# Supplementary material
Source: publisher figshare collection journal article supplement (https://acs.figshare.com/ndownloader/files/5908059)
Supplement: Supplementary file 1 [file 5908059]

data_jg128abscorr
_audit_creation_date              2016-03-03
_audit_creation_method
;
Olex2 1.2
(compiled 2016.02.19 svn.r3266 for OlexSys, GUI svn.r5155)
;
_publ_contact_author_address      ?
_publ_contact_author_email        ?
_publ_contact_author_name         ''
_publ_contact_author_phone        ?
_publ_section_references
;
Bourhis, L.J., Dolomanov, O.V., Gildea, R.J., Howard, J.A.K., Puschmann, H.
 (2015). Acta Cryst. A71, 59-75.

Dolomanov, O.V., Bourhis, L.J., Gildea, R.J, Howard, J.A.K. & Puschmann, H.
 (2009), J. Appl. Cryst. 42, 339-341.

Sheldrick, G.M. (2008). Acta Cryst. A64, 112-122.
;
_chemical_name_common             ?
_chemical_name_systematic         ?
_chemical_formula_moiety          'C25 H42 I Ir N O6 P'
_chemical_formula_sum             'C25 H42 I Ir N O6 P'
_chemical_formula_weight          802.67
_chemical_melting_point           ?
loop_
  _atom_type_symbol
  _atom_type_description
  _atom_type_scat_dispersion_real
  _atom_type_scat_dispersion_imag
  _atom_type_scat_source
 'C' 'C' 0.0181 0.0091 'International Tables Vol C Tables 4.2.6.8 and 6.1.1.4'
 'H' 'H' 0.0000 0.0000 'International Tables Vol C Tables 4.2.6.8 and 6.1.1.4'
 'I' 'I' -0.3257 6.8362 'International Tables Vol C Tables 4.2.6.8 and 6.1.1.4'
 'Ir' 'Ir' -4.7710 6.5667
 'International Tables Vol C Tables 4.2.6.8 and 6.1.1.4'
 'N' 'N' 0.0311 0.0180 'International Tables Vol C Tables 4.2.6.8 and 6.1.1.4'
 'O' 'O' 0.0492 0.0322 'International Tables Vol C Tables 4.2.6.8 and 6.1.1.4'
 'P' 'P' 0.2955 0.4335 'International Tables Vol C Tables 4.2.6.8 and 6.1.1.4'

_space_group_crystal_system       'orthorhombic'
_space_group_IT_number            61
_space_group_name_H-M_alt         'P b c a'
_space_group_name_Hall            '-P 2ac 2ab'
loop_
  _space_group_symop_id
  _space_group_symop_operation_xyz
 1 'x, y, z'
 2 '-x+1/2, -y, z+1/2'
 3 'x+1/2, -y+1/2, -z'
 4 '-x, y+1/2, -z+1/2'
 5 '-x, -y, -z'
 6 'x-1/2, y, -z-1/2'
 7 '-x-1/2, y-1/2, z'
 8 'x, -y-1/2, z-1/2'

_cell_length_a                    9.3658(2)
_cell_length_b                    14.7653(3)
_cell_length_c                    40.8371(9)
_cell_angle_alpha                 90.00
_cell_angle_beta                  90.00
_cell_angle_gamma                 90.00
_cell_volume                      5647.3(2)
_cell_formula_units_Z             8
_cell_measurement_reflns_used     9696
_cell_measurement_temperature     100.15
_cell_measurement_theta_max       72.24
_cell_measurement_theta_min       5.20
_exptl_absorpt_coefficient_mu     18.593
_exptl_absorpt_correction_T_max   0.3452
_exptl_absorpt_correction_T_min   0.0850
_exptl_absorpt_correction_type    numerical
_exptl_absorpt_process_details
;
SADABS-2014/2 (Bruker,2014/2) was used for absorption correction.
wR2(int) was 0.1143 before and 0.0631 after correction.
The Ratio of minimum to maximum transmission is 0.2462.
The \l/2 correction factor is 0.00150.
;
_exptl_crystal_colour             'clear yellowish yellow'
_exptl_crystal_colour_lustre      clear
_exptl_crystal_colour_modifier    yellowish
_exptl_crystal_colour_primary     yellow
_exptl_crystal_density_diffrn     1.888
_exptl_crystal_density_meas       ?
_exptl_crystal_density_method     'not measured'
_exptl_crystal_description        block
_exptl_crystal_F_000              3136
_exptl_crystal_preparation        ?
_exptl_crystal_size_max           0.292
_exptl_crystal_size_mid           0.212
_exptl_crystal_size_min           0.148
_exptl_special_details
;
 ? 
;
_diffrn_reflns_av_R_equivalents   0.0649
_diffrn_reflns_av_unetI/netI      0.0270
_diffrn_reflns_limit_h_max        11
_diffrn_reflns_limit_h_min        -11
_diffrn_reflns_limit_k_max        17
_diffrn_reflns_limit_k_min        -14
_diffrn_reflns_limit_l_max        50
_diffrn_reflns_limit_l_min        -50
_diffrn_reflns_number             74407
_diffrn_reflns_theta_full         72.46
_diffrn_reflns_theta_max          72.46
_diffrn_reflns_theta_min          5.20
_diffrn_ambient_temperature       100.15
_diffrn_detector_area_resol_mean  ?
_diffrn_measured_fraction_theta_full 0.992
_diffrn_measured_fraction_theta_max 0.992
_diffrn_measurement_device_type   'Bruker APEX-II CCD'
_diffrn_measurement_method        '\f and \w scans'
_diffrn_radiation_monochromator   graphite
_diffrn_radiation_type            CuK\a
_diffrn_radiation_wavelength      1.54178
_diffrn_source                    'fine-focus sealed tube'
_diffrn_standards_number          0
_reflns_number_gt                 5410
_reflns_number_total              5559
_reflns_threshold_expression      >2sigma(I)
_computing_cell_refinement        'SAINT v8.34A (Bruker, 2013)'
_computing_data_collection        ?
_computing_data_reduction         'SAINT v8.34A (Bruker, 2013)'
_computing_molecular_graphics     'Olex2 (Dolomanov et al., 2009)'
_computing_publication_material   'Olex2 (Dolomanov et al., 2009)'
_computing_structure_refinement   'XL (Sheldrick, 2008)'
_computing_structure_solution     'olex2.solve (Bourhis et al., 2015)'
_refine_diff_density_max          1.709
_refine_diff_density_min          -1.210
_refine_diff_density_rms          0.140
_refine_ls_extinction_coef        ?
_refine_ls_extinction_method      none
_refine_ls_goodness_of_fit_ref    1.172
_refine_ls_hydrogen_treatment     constr
_refine_ls_matrix_type            full
_refine_ls_number_parameters      321
_refine_ls_number_reflns          5559
_refine_ls_number_restraints      0
_refine_ls_R_factor_all           0.0294
_refine_ls_R_factor_gt            0.0284
_refine_ls_restrained_S_all       1.172
_refine_ls_shift/su_max           0.003
_refine_ls_shift/su_mean          0.000
_refine_ls_structure_factor_coef  Fsqd
_refine_ls_weighting_details
'calc w=1/[\s^2^(Fo^2^)+(0.0317P)^2^+13.4504P] where P=(Fo^2^+2Fc^2^)/3'
_refine_ls_weighting_scheme       calc
_refine_ls_wR_factor_gt           0.0699
_refine_ls_wR_factor_ref          0.0705
_refine_special_details
;
 Refinement of F^2^ against ALL reflections.  The weighted R-factor wR and 
 goodness of fit S are based on F^2^, conventional R-factors R are based 
 on F, with F set to zero for negative F^2^. The threshold expression of 
 F^2^ > 2sigma(F^2^) is used only for calculating R-factors(gt) etc. and is 
 not relevant to the choice of reflections for refinement.  R-factors based 
 on F^2^ are statistically about twice as large as those based on F, and R- 
 factors based on ALL data will be even larger. 
;
_olex2_refinement_description
;
1. Others
 Fixed Uiso: H10(0.022) H11(0.025) H1A(0.033) H1B(0.033) H1C(0.033)
 H24A(0.028) H24B(0.028) H16A(0.025) H16B(0.025) H15A(0.023) H15B(0.023)
 H25A(0.024) H25B(0.024) H12(0.025) H8A(0.048) H8B(0.048) H8C(0.048) H3(0.024)
 H6(0.025) H7A(0.04) H7B(0.04) H7C(0.04) H5A(0.041) H5B(0.041) H5C(0.041)
 H19A(0.028) H19B(0.028) H18A(0.027) H18B(0.027) H17A(0.03) H17B(0.03)
 H20A(0.031) H20B(0.031) H21A(0.031) H21B(0.031) H22A(0.028) H22B(0.028)
 H23A(0.027) H23B(0.027) H4A(0.04) H4B(0.04) H4C(0.04)
 Fixed X: H10(0.0779) H11(-0.1393) H1A(0.23) H1B(0.2532) H1C(0.3449)
 H24A(0.0235) H24B(-0.0107) H16A(0.0166) H16B(0.0647) H15A(-0.2525) H15B(-
 0.2535) H25A(-0.2235) H25B(-0.2117) H12(-0.2627) H8A(0.3991) H8B(0.5609)
 H8C(0.4561) H3(0.0471) H6(0.4364) H7A(0.4956) H7B(0.6103) H7C(0.4817)
 H5A(0.1506) H5B(0.1342) H5C(0.287) H19A(-0.2451) H19B(-0.3167) H18A(-0.1826)
 H18B(-0.3093) H17A(-0.214) H17B(-0.0815) H20A(-0.0439) H20B(-0.2046) H21A(-
 0.0282) H21B(0.0275) H22A(-0.0619) H22B(-0.2091) H23A(-0.0134) H23B(0.042)
 H4A(0.3106) H4B(0.1587) H4C(0.1878)
 Fixed Y: H10(0.2533) H11(0.1775) H1A(0.2622) H1B(0.301) H1C(0.3405)
 H24A(0.3669) H24B(0.4695) H16A(0.2097) H16B(0.2542) H15A(0.2612) H15B(0.3663)
 H25A(0.3338) H25B(0.4287) H12(0.2007) H8A(0.5712) H8B(0.5413) H8C(0.4762)
 H3(0.5373) H6(0.519) H7A(0.3447) H7B(0.4089) H7C(0.3665) H5A(0.6375)
 H5B(0.6837) H5C(0.6483) H19A(0.259) H19B(0.1679) H18A(0.0861) H18B(0.1485)
 H17A(0.1808) H17B(0.114) H20A(0.1837) H20B(0.2164) H21A(0.3354) H21B(0.3199)
 H22A(0.4852) H22B(0.4978) H23A(0.5201) H23B(0.4194) H4A(0.5483) H4B(0.5821)
 H4C(0.4763)
 Fixed Z: H10(0.5011) H11(0.5112) H1A(0.6054) H1B(0.6416) H1C(0.6118)
 H24A(0.6957) H24B(0.6851) H16A(0.629) H16B(0.6628) H15A(0.6188) H15B(0.6091)
 H25A(0.6759) H25B(0.6572) H12(0.5601) H8A(0.6026) H8B(0.5961) H8C(0.6162)
 H3(0.5387) H6(0.5486) H7A(0.5753) H7B(0.5578) H7C(0.537) H5A(0.5773)
 H5B(0.5421) H5C(0.554) H19A(0.75) H19B(0.7638) H18A(0.7217) H18B(0.7079)
 H17A(0.6583) H17B(0.6643) H20A(0.8174) H20B(0.8114) H21A(0.8231) H21B(0.7864)
 H22A(0.7955) H22B(0.7762) H23A(0.7408) H23B(0.7483) H4A(0.5036) H4B(0.4905)
 H4C(0.4956)
;
_atom_sites_solution_hydrogens    geom
_atom_sites_solution_primary      iterative
_atom_sites_solution_secondary    difmap
loop_
  _atom_site_label
  _atom_site_type_symbol
  _atom_site_fract_x
  _atom_site_fract_y
  _atom_site_fract_z
  _atom_site_U_iso_or_equiv
  _atom_site_adp_type
  _atom_site_occupancy
  _atom_site_calc_flag
  _atom_site_disorder_assembly
  _atom_site_disorder_group
  _atom_site_refinement_flags_posn
 Ir1 Ir 0.092288(15) 0.415833(10) 0.609735(3) 0.01404(7) Uani 1 d . . .
 C10 C 0.0274(4) 0.2622(2) 0.52101(9) 0.0186(7) Uani 1 d . . .
 H10 H 0.0779 0.2533 0.5011 0.022 Uiso 1 calc . . R
 C9 C 0.0785(4) 0.3195(2) 0.54493(9) 0.0154(7) Uani 1 d . . .
 C11 C -0.1015(4) 0.2177(3) 0.52716(9) 0.0206(8) Uani 1 d . . .
 H11 H -0.1393 0.1775 0.5112 0.025 Uiso 1 calc . . R
 C14 C 0.0085(4) 0.3352(2) 0.57423(8) 0.0156(7) Uani 1 d . . .
 I1 I -0.11576(3) 0.549898(17) 0.603268(6) 0.02251(8) Uani 1 d . . .
 O1 O 0.2347(3) 0.54414(19) 0.65894(7) 0.0272(6) Uani 1 d . . .
 C1 C 0.2515(4) 0.3165(3) 0.61827(9) 0.0223(8) Uani 1 d . . .
 H1A H 0.2300 0.2622 0.6054 0.033 Uiso 1 calc . . GR
 H1B H 0.2532 0.3010 0.6416 0.033 Uiso 1 calc . . GR
 H1C H 0.3449 0.3405 0.6118 0.033 Uiso 1 calc . . GR
 N9 N -0.0808(3) 0.3314(2) 0.63792(7) 0.0169(6) Uani 1 d . . .
 C13 C -0.1209(4) 0.2900(3) 0.57977(9) 0.0184(7) Uani 1 d . . .
 C24 C -0.0541(4) 0.4114(3) 0.69203(10) 0.0234(8) Uani 1 d . . .
 H24A H 0.0235 0.3669 0.6957 0.028 Uiso 1 calc . . R
 H24B H -0.0107 0.4695 0.6851 0.028 Uiso 1 calc . . R
 C16 C -0.0190(4) 0.2415(3) 0.64876(9) 0.0204(7) Uani 1 d . . .
 H16A H 0.0166 0.2097 0.6290 0.025 Uiso 1 calc . . R
 H16B H 0.0647 0.2542 0.6628 0.025 Uiso 1 calc . . R
 C15 C -0.1916(4) 0.3125(3) 0.61187(8) 0.0194(7) Uani 1 d . . .
 H15A H -0.2525 0.2612 0.6188 0.023 Uiso 1 calc . . R
 H15B H -0.2535 0.3663 0.6091 0.023 Uiso 1 calc . . R
 C25 C -0.1557(4) 0.3771(3) 0.66582(9) 0.0197(7) Uani 1 d . . .
 H25A H -0.2235 0.3338 0.6759 0.024 Uiso 1 calc . . R
 H25B H -0.2117 0.4287 0.6572 0.024 Uiso 1 calc . . R
 C12 C -0.1752(4) 0.2315(3) 0.55631(9) 0.0210(8) Uani 1 d . . .
 H12 H -0.2627 0.2007 0.5601 0.025 Uiso 1 calc . . R
 P1 P 0.22252(9) 0.45304(6) 0.56552(2) 0.01546(18) Uani 1 d . . .
 O2 O 0.2094(3) 0.36502(17) 0.54090(6) 0.0177(5) Uani 1 d . . .
 C8 C 0.4624(4) 0.5198(3) 0.59817(11) 0.0318(10) Uani 1 d . . .
 H8A H 0.3991 0.5712 0.6026 0.048 Uiso 1 calc . . GR
 H8B H 0.5609 0.5413 0.5961 0.048 Uiso 1 calc . . GR
 H8C H 0.4561 0.4762 0.6162 0.048 Uiso 1 calc . . GR
 C3 C 0.1533(4) 0.5443(3) 0.53947(9) 0.0200(7) Uani 1 d . . .
 H3 H 0.0471 0.5373 0.5387 0.024 Uiso 1 calc . . R
 C6 C 0.4172(4) 0.4741(3) 0.56637(9) 0.0212(8) Uani 1 d . . .
 H6 H 0.4364 0.5190 0.5486 0.025 Uiso 1 calc . . R
 C7 C 0.5095(4) 0.3910(3) 0.55841(10) 0.0267(8) Uani 1 d . . .
 H7A H 0.4956 0.3447 0.5753 0.040 Uiso 1 calc . . GR
 H7B H 0.6103 0.4089 0.5578 0.040 Uiso 1 calc . . GR
 H7C H 0.4817 0.3665 0.5370 0.040 Uiso 1 calc . . GR
 C5 C 0.1840(5) 0.6367(3) 0.55457(10) 0.0272(9) Uani 1 d . . .
 H5A H 0.1506 0.6375 0.5773 0.041 Uiso 1 calc . . GR
 H5B H 0.1342 0.6837 0.5421 0.041 Uiso 1 calc . . GR
 H5C H 0.2870 0.6483 0.5540 0.041 Uiso 1 calc . . GR
 C2 C 0.1785(4) 0.4941(2) 0.64189(9) 0.0188(7) Uani 1 d . . .
 O3 O -0.1155(3) 0.2001(2) 0.70066(7) 0.0252(6) Uani 1 d . . .
 C19 C -0.2319(4) 0.1928(3) 0.75247(10) 0.0237(8) Uani 1 d . . .
 H19A H -0.2451 0.2590 0.7500 0.028 Uiso 1 calc . . R
 H19B H -0.3167 0.1679 0.7638 0.028 Uiso 1 calc . . R
 C18 C -0.2160(4) 0.1494(3) 0.71923(9) 0.0223(8) Uani 1 d . . .
 H18A H -0.1826 0.0861 0.7217 0.027 Uiso 1 calc . . R
 H18B H -0.3093 0.1485 0.7079 0.027 Uiso 1 calc . . R
 C17 C -0.1158(5) 0.1769(3) 0.66712(10) 0.0250(8) Uani 1 d . . .
 H17A H -0.2140 0.1808 0.6583 0.030 Uiso 1 calc . . R
 H17B H -0.0815 0.1140 0.6643 0.030 Uiso 1 calc . . R
 O6 O -0.1336(3) 0.42379(18) 0.72122(6) 0.0214(6) Uani 1 d . . .
 O5 O -0.1689(3) 0.37093(19) 0.78895(6) 0.0227(6) Uani 1 d . . .
 O4 O -0.1061(3) 0.1749(2) 0.77128(7) 0.0257(6) Uani 1 d . . .
 C20 C -0.1065(4) 0.2180(3) 0.80233(10) 0.0259(9) Uani 1 d . . .
 H20A H -0.0439 0.1837 0.8174 0.031 Uiso 1 calc . . R
 H20B H -0.2046 0.2164 0.8114 0.031 Uiso 1 calc . . R
 C21 C -0.0566(4) 0.3150(3) 0.80099(10) 0.0259(8) Uani 1 d . . .
 H21A H -0.0282 0.3354 0.8231 0.031 Uiso 1 calc . . R
 H21B H 0.0275 0.3199 0.7864 0.031 Uiso 1 calc . . R
 C22 C -0.1240(4) 0.4584(3) 0.77842(9) 0.0233(8) Uani 1 d . . .
 H22A H -0.0619 0.4852 0.7955 0.028 Uiso 1 calc . . R
 H22B H -0.2091 0.4978 0.7762 0.028 Uiso 1 calc . . R
 C23 C -0.0442(4) 0.4578(3) 0.74634(9) 0.0228(8) Uani 1 d . . .
 H23A H -0.0134 0.5201 0.7408 0.027 Uiso 1 calc . . R
 H23B H 0.0420 0.4194 0.7483 0.027 Uiso 1 calc . . R
 C4 C 0.2075(5) 0.5371(3) 0.50410(9) 0.0267(8) Uani 1 d . . .
 H4A H 0.3106 0.5483 0.5036 0.040 Uiso 1 calc . . GR
 H4B H 0.1587 0.5821 0.4905 0.040 Uiso 1 calc . . GR
 H4C H 0.1878 0.4763 0.4956 0.040 Uiso 1 calc . . GR

loop_
  _atom_site_aniso_label
  _atom_site_aniso_U_11
  _atom_site_aniso_U_22
  _atom_site_aniso_U_33
  _atom_site_aniso_U_23
  _atom_site_aniso_U_13
  _atom_site_aniso_U_12
 Ir1 0.01523(10) 0.01640(10) 0.01050(9) -0.00116(5) -0.00074(5) 0.00095(5)
 C10 0.0221(18) 0.0199(18) 0.0137(16) -0.0010(13) -0.0013(13) 0.0022(14)
 C9 0.0171(16) 0.0136(17) 0.0155(17) -0.0004(13) -0.0031(13) 0.0016(13)
 C11 0.0260(19) 0.0177(18) 0.0181(18) -0.0029(14) -0.0069(14) -0.0016(14)
 C14 0.0209(17) 0.0162(17) 0.0097(15) -0.0014(12) -0.0025(13) 0.0015(14)
 I1 0.02004(13) 0.02316(15) 0.02434(13) 0.00363(9) 0.00279(9) 0.00533(9)
 O1 0.0296(15) 0.0312(15) 0.0206(14) -0.0077(11) -0.0021(12) -0.0043(12)
 C1 0.0243(19) 0.027(2) 0.0157(17) 0.0011(14) -0.0020(14) 0.0026(15)
 N9 0.0198(15) 0.0173(16) 0.0137(15) -0.0011(11) -0.0008(11) -0.0012(12)
 C13 0.0199(17) 0.0205(19) 0.0148(17) 0.0012(14) -0.0015(13) 0.0014(14)
 C24 0.0241(19) 0.029(2) 0.0169(19) -0.0065(14) 0.0059(15) -0.0032(16)
 C16 0.0259(19) 0.0207(19) 0.0146(17) 0.0004(13) -0.0016(14) 0.0037(15)
 C15 0.0187(18) 0.027(2) 0.0126(17) 0.0003(13) -0.0011(13) -0.0024(15)
 C25 0.0233(18) 0.0218(19) 0.0139(17) -0.0018(13) 0.0040(14) -0.0007(15)
 C12 0.0216(18) 0.022(2) 0.0195(18) 0.0033(14) -0.0036(14) -0.0033(15)
 P1 0.0155(4) 0.0184(4) 0.0125(4) -0.0013(3) 0.0002(3) -0.0008(3)
 O2 0.0185(12) 0.0193(13) 0.0152(12) -0.0031(9) 0.0017(9) -0.0017(10)
 C8 0.0176(19) 0.050(3) 0.028(2) -0.0155(19) -0.0003(16) -0.0064(18)
 C3 0.0202(18) 0.0208(19) 0.0190(18) 0.0021(14) -0.0014(14) 0.0005(15)
 C6 0.0127(17) 0.032(2) 0.0189(19) -0.0036(15) 0.0030(13) -0.0031(15)
 C7 0.0202(19) 0.036(2) 0.023(2) -0.0042(16) 0.0024(15) 0.0047(17)
 C5 0.032(2) 0.023(2) 0.027(2) 0.0004(16) 0.0032(16) -0.0049(16)
 C2 0.0229(18) 0.0172(18) 0.0162(17) 0.0003(14) 0.0015(14) 0.0032(14)
 O3 0.0317(15) 0.0285(16) 0.0153(13) 0.0003(11) 0.0005(11) -0.0085(12)
 C19 0.0213(19) 0.026(2) 0.0234(19) 0.0034(15) 0.0014(15) 0.0026(16)
 C18 0.0241(19) 0.0208(19) 0.0220(19) 0.0020(14) 0.0026(15) -0.0026(15)
 C17 0.036(2) 0.023(2) 0.0162(19) -0.0030(15) -0.0001(15) -0.0018(16)
 O6 0.0247(14) 0.0261(15) 0.0135(13) -0.0043(10) 0.0045(11) -0.0020(11)
 O5 0.0231(14) 0.0255(15) 0.0196(13) 0.0015(10) 0.0029(10) 0.0004(11)
 O4 0.0308(15) 0.0312(16) 0.0152(13) -0.0010(11) 0.0015(11) 0.0081(12)
 C20 0.032(2) 0.031(2) 0.0147(18) 0.0021(15) 0.0036(15) 0.0054(17)
 C21 0.0251(19) 0.033(2) 0.0197(19) -0.0001(16) 0.0023(15) 0.0025(17)
 C22 0.031(2) 0.024(2) 0.0148(18) -0.0048(14) 0.0025(15) -0.0032(16)
 C23 0.029(2) 0.025(2) 0.0146(18) -0.0005(14) 0.0012(15) -0.0046(16)
 C4 0.033(2) 0.032(2) 0.0153(18) 0.0045(15) 0.0012(15) 0.0040(17)

_geom_special_details
;
 All esds (except the esd in the dihedral angle between two l.s. planes) 
 are estimated using the full covariance matrix.  The cell esds are taken 
 into account individually in the estimation of esds in distances, angles 
 and torsion angles; correlations between esds in cell parameters are only 
 used when they are defined by crystal symmetry.  An approximate (isotropic) 
 treatment of cell esds is used for estimating esds involving l.s. planes. 
;
loop_
  _geom_bond_atom_site_label_1
  _geom_bond_atom_site_label_2
  _geom_bond_distance
  _geom_bond_site_symmetry_2
  _geom_bond_publ_flag
 Ir1 C14 2.034(3) . ?
 Ir1 I1 2.7901(3) . ?
 Ir1 C1 2.120(4) . ?
 Ir1 N9 2.347(3) . ?
 Ir1 P1 2.2472(9) . ?
 Ir1 C2 1.927(4) . ?
 C10 H10 0.9500 . ?
 C10 C9 1.378(5) . ?
 C10 C11 1.397(5) . ?
 C9 C14 1.384(5) . ?
 C9 O2 1.408(4) . ?
 C11 H11 0.9500 . ?
 C11 C12 1.391(5) . ?
 C14 C13 1.402(5) . ?
 O1 C2 1.143(5) . ?
 C1 H1A 0.9800 . ?
 C1 H1B 0.9800 . ?
 C1 H1C 0.9800 . ?
 N9 C16 1.515(5) . ?
 N9 C15 1.512(5) . ?
 N9 C25 1.498(4) . ?
 C13 C15 1.506(5) . ?
 C13 C12 1.388(5) . ?
 C24 H24A 0.9900 . ?
 C24 H24B 0.9900 . ?
 C24 C25 1.519(5) . ?
 C24 O6 1.417(4) . ?
 C16 H16A 0.9900 . ?
 C16 H16B 0.9900 . ?
 C16 C17 1.514(6) . ?
 C15 H15A 0.9900 . ?
 C15 H15B 0.9900 . ?
 C25 H25A 0.9900 . ?
 C25 H25B 0.9900 . ?
 C12 H12 0.9500 . ?
 P1 O2 1.648(3) . ?
 P1 C3 1.835(4) . ?
 P1 C6 1.849(4) . ?
 C8 H8A 0.9800 . ?
 C8 H8B 0.9800 . ?
 C8 H8C 0.9800 . ?
 C8 C6 1.523(5) . ?
 C3 H3 1.0000 . ?
 C3 C5 1.525(5) . ?
 C3 C4 1.535(5) . ?
 C6 H6 1.0000 . ?
 C6 C7 1.535(6) . ?
 C7 H7A 0.9800 . ?
 C7 H7B 0.9800 . ?
 C7 H7C 0.9800 . ?
 C5 H5A 0.9800 . ?
 C5 H5B 0.9800 . ?
 C5 H5C 0.9800 . ?
 O3 C18 1.422(5) . ?
 O3 C17 1.412(5) . ?
 C19 H19A 0.9900 . ?
 C19 H19B 0.9900 . ?
 C19 C18 1.508(5) . ?
 C19 O4 1.431(5) . ?
 C18 H18A 0.9900 . ?
 C18 H18B 0.9900 . ?
 C17 H17A 0.9900 . ?
 C17 H17B 0.9900 . ?
 O6 C23 1.416(5) . ?
 O5 C21 1.424(5) . ?
 O5 C22 1.425(5) . ?
 O4 C20 1.419(5) . ?
 C20 H20A 0.9900 . ?
 C20 H20B 0.9900 . ?
 C20 C21 1.508(6) . ?
 C21 H21A 0.9900 . ?
 C21 H21B 0.9900 . ?
 C22 H22A 0.9900 . ?
 C22 H22B 0.9900 . ?
 C22 C23 1.508(5) . ?
 C23 H23A 0.9900 . ?
 C23 H23B 0.9900 . ?
 C4 H4A 0.9800 . ?
 C4 H4B 0.9800 . ?
 C4 H4C 0.9800 . ?

loop_
  _geom_angle_atom_site_label_1
  _geom_angle_atom_site_label_2
  _geom_angle_atom_site_label_3
  _geom_angle
  _geom_angle_site_symmetry_1
  _geom_angle_site_symmetry_3
  _geom_angle_publ_flag
 C14 Ir1 I1 94.52(10) . . ?
 C14 Ir1 C1 89.04(15) . . ?
 C14 Ir1 N9 76.82(13) . . ?
 C14 Ir1 P1 77.27(10) . . ?
 C1 Ir1 I1 175.86(10) . . ?
 C1 Ir1 N9 92.16(13) . . ?
 C1 Ir1 P1 85.38(11) . . ?
 N9 Ir1 I1 86.61(8) . . ?
 P1 Ir1 I1 97.44(2) . . ?
 P1 Ir1 N9 154.02(8) . . ?
 C2 Ir1 C14 177.24(15) . . ?
 C2 Ir1 I1 86.07(11) . . ?
 C2 Ir1 C1 90.47(15) . . ?
 C2 Ir1 N9 105.91(13) . . ?
 C2 Ir1 P1 99.98(11) . . ?
 C9 C10 H10 121.3 . . ?
 C9 C10 C11 117.5(3) . . ?
 C11 C10 H10 121.3 . . ?
 C10 C9 C14 123.4(3) . . ?
 C10 C9 O2 120.8(3) . . ?
 C14 C9 O2 115.7(3) . . ?
 C10 C11 H11 119.5 . . ?
 C12 C11 C10 121.0(3) . . ?
 C12 C11 H11 119.5 . . ?
 C9 C14 Ir1 122.1(3) . . ?
 C9 C14 C13 118.0(3) . . ?
 C13 C14 Ir1 119.8(3) . . ?
 Ir1 C1 H1A 109.5 . . ?
 Ir1 C1 H1B 109.5 . . ?
 Ir1 C1 H1C 109.5 . . ?
 H1A C1 H1B 109.5 . . ?
 H1A C1 H1C 109.5 . . ?
 H1B C1 H1C 109.5 . . ?
 C16 N9 Ir1 110.2(2) . . ?
 C15 N9 Ir1 103.1(2) . . ?
 C15 N9 C16 107.8(3) . . ?
 C25 N9 Ir1 117.2(2) . . ?
 C25 N9 C16 110.6(3) . . ?
 C25 N9 C15 107.3(3) . . ?
 C14 C13 C15 114.6(3) . . ?
 C12 C13 C14 120.1(3) . . ?
 C12 C13 C15 125.3(3) . . ?
 H24A C24 H24B 108.5 . . ?
 C25 C24 H24A 110.1 . . ?
 C25 C24 H24B 110.1 . . ?
 O6 C24 H24A 110.1 . . ?
 O6 C24 H24B 110.1 . . ?
 O6 C24 C25 107.8(3) . . ?
 N9 C16 H16A 107.8 . . ?
 N9 C16 H16B 107.8 . . ?
 H16A C16 H16B 107.2 . . ?
 C17 C16 N9 117.9(3) . . ?
 C17 C16 H16A 107.8 . . ?
 C17 C16 H16B 107.8 . . ?
 N9 C15 H15A 109.5 . . ?
 N9 C15 H15B 109.5 . . ?
 C13 C15 N9 110.6(3) . . ?
 C13 C15 H15A 109.5 . . ?
 C13 C15 H15B 109.5 . . ?
 H15A C15 H15B 108.1 . . ?
 N9 C25 C24 113.1(3) . . ?
 N9 C25 H25A 109.0 . . ?
 N9 C25 H25B 109.0 . . ?
 C24 C25 H25A 109.0 . . ?
 C24 C25 H25B 109.0 . . ?
 H25A C25 H25B 107.8 . . ?
 C11 C12 H12 120.0 . . ?
 C13 C12 C11 120.0(4) . . ?
 C13 C12 H12 120.0 . . ?
 O2 P1 Ir1 104.90(10) . . ?
 O2 P1 C3 101.48(15) . . ?
 O2 P1 C6 102.54(16) . . ?
 C3 P1 Ir1 116.96(13) . . ?
 C3 P1 C6 103.66(19) . . ?
 C6 P1 Ir1 124.12(13) . . ?
 C9 O2 P1 111.7(2) . . ?
 H8A C8 H8B 109.5 . . ?
 H8A C8 H8C 109.5 . . ?
 H8B C8 H8C 109.5 . . ?
 C6 C8 H8A 109.5 . . ?
 C6 C8 H8B 109.5 . . ?
 C6 C8 H8C 109.5 . . ?
 P1 C3 H3 107.0 . . ?
 C5 C3 P1 110.8(3) . . ?
 C5 C3 H3 107.0 . . ?
 C5 C3 C4 112.3(3) . . ?
 C4 C3 P1 112.2(3) . . ?
 C4 C3 H3 107.0 . . ?
 P1 C6 H6 106.0 . . ?
 C8 C6 P1 111.4(3) . . ?
 C8 C6 H6 106.0 . . ?
 C8 C6 C7 112.2(3) . . ?
 C7 C6 P1 114.7(3) . . ?
 C7 C6 H6 106.0 . . ?
 C6 C7 H7A 109.5 . . ?
 C6 C7 H7B 109.5 . . ?
 C6 C7 H7C 109.5 . . ?
 H7A C7 H7B 109.5 . . ?
 H7A C7 H7C 109.5 . . ?
 H7B C7 H7C 109.5 . . ?
 C3 C5 H5A 109.5 . . ?
 C3 C5 H5B 109.5 . . ?
 C3 C5 H5C 109.5 . . ?
 H5A C5 H5B 109.5 . . ?
 H5A C5 H5C 109.5 . . ?
 H5B C5 H5C 109.5 . . ?
 O1 C2 Ir1 174.5(3) . . ?
 C17 O3 C18 112.9(3) . . ?
 H19A C19 H19B 108.3 . . ?
 C18 C19 H19A 109.9 . . ?
 C18 C19 H19B 109.9 . . ?
 O4 C19 H19A 109.9 . . ?
 O4 C19 H19B 109.9 . . ?
 O4 C19 C18 108.8(3) . . ?
 O3 C18 C19 108.7(3) . . ?
 O3 C18 H18A 109.9 . . ?
 O3 C18 H18B 109.9 . . ?
 C19 C18 H18A 109.9 . . ?
 C19 C18 H18B 109.9 . . ?
 H18A C18 H18B 108.3 . . ?
 C16 C17 H17A 109.9 . . ?
 C16 C17 H17B 109.9 . . ?
 O3 C17 C16 109.1(3) . . ?
 O3 C17 H17A 109.9 . . ?
 O3 C17 H17B 109.9 . . ?
 H17A C17 H17B 108.3 . . ?
 C23 O6 C24 110.2(3) . . ?
 C21 O5 C22 114.3(3) . . ?
 C20 O4 C19 113.2(3) . . ?
 O4 C20 H20A 108.9 . . ?
 O4 C20 H20B 108.9 . . ?
 O4 C20 C21 113.2(3) . . ?
 H20A C20 H20B 107.8 . . ?
 C21 C20 H20A 108.9 . . ?
 C21 C20 H20B 108.9 . . ?
 O5 C21 C20 109.5(3) . . ?
 O5 C21 H21A 109.8 . . ?
 O5 C21 H21B 109.8 . . ?
 C20 C21 H21A 109.8 . . ?
 C20 C21 H21B 109.8 . . ?
 H21A C21 H21B 108.2 . . ?
 O5 C22 H22A 108.8 . . ?
 O5 C22 H22B 108.8 . . ?
 O5 C22 C23 113.8(3) . . ?
 H22A C22 H22B 107.7 . . ?
 C23 C22 H22A 108.8 . . ?
 C23 C22 H22B 108.8 . . ?
 O6 C23 C22 109.8(3) . . ?
 O6 C23 H23A 109.7 . . ?
 O6 C23 H23B 109.7 . . ?
 C22 C23 H23A 109.7 . . ?
 C22 C23 H23B 109.7 . . ?
 H23A C23 H23B 108.2 . . ?
 C3 C4 H4A 109.5 . . ?
 C3 C4 H4B 109.5 . . ?
 C3 C4 H4C 109.5 . . ?
 H4A C4 H4B 109.5 . . ?
 H4A C4 H4C 109.5 . . ?
 H4B C4 H4C 109.5 . . ?

loop_
  _geom_torsion_atom_site_label_1
  _geom_torsion_atom_site_label_2
  _geom_torsion_atom_site_label_3
  _geom_torsion_atom_site_label_4
  _geom_torsion
  _geom_torsion_site_symmetry_1
  _geom_torsion_site_symmetry_2
  _geom_torsion_site_symmetry_3
  _geom_torsion_site_symmetry_4
  _geom_torsion_publ_flag
 Ir1 C14 C13 C15 4.3(4) . . . . ?
 Ir1 C14 C13 C12 -176.9(3) . . . . ?
 Ir1 N9 C16 C17 -179.4(3) . . . . ?
 Ir1 N9 C15 C13 40.5(3) . . . . ?
 Ir1 N9 C25 C24 -57.1(4) . . . . ?
 Ir1 P1 O2 C9 29.9(2) . . . . ?
 Ir1 P1 C3 C5 78.6(3) . . . . ?
 Ir1 P1 C3 C4 -154.9(2) . . . . ?
 Ir1 P1 C6 C8 -35.2(4) . . . . ?
 Ir1 P1 C6 C7 93.5(3) . . . . ?
 C10 C9 C14 Ir1 177.1(3) . . . . ?
 C10 C9 C14 C13 0.1(5) . . . . ?
 C10 C9 O2 P1 160.7(3) . . . . ?
 C10 C11 C12 C13 0.0(6) . . . . ?
 C9 C10 C11 C12 0.3(5) . . . . ?
 C9 C14 C13 C15 -178.6(3) . . . . ?
 C9 C14 C13 C12 0.2(5) . . . . ?
 C11 C10 C9 C14 -0.4(5) . . . . ?
 C11 C10 C9 O2 178.4(3) . . . . ?
 C14 Ir1 N9 C16 85.0(2) . . . . ?
 C14 Ir1 N9 C15 -29.8(2) . . . . ?
 C14 Ir1 N9 C25 -147.4(3) . . . . ?
 C14 Ir1 P1 O2 -22.79(14) . . . . ?
 C14 Ir1 P1 C3 88.71(17) . . . . ?
 C14 Ir1 P1 C6 -139.64(19) . . . . ?
 C14 Ir1 C2 O1 19(6) . . . . ?
 C14 C9 O2 P1 -20.4(4) . . . . ?
 C14 C13 C15 N9 -33.0(4) . . . . ?
 C14 C13 C12 C11 -0.3(6) . . . . ?
 I1 Ir1 C14 C9 112.7(3) . . . . ?
 I1 Ir1 C14 C13 -70.4(3) . . . . ?
 I1 Ir1 N9 C16 -179.5(2) . . . . ?
 I1 Ir1 N9 C15 65.6(2) . . . . ?
 I1 Ir1 N9 C25 -52.0(2) . . . . ?
 I1 Ir1 P1 O2 -115.77(10) . . . . ?
 I1 Ir1 P1 C3 -4.27(14) . . . . ?
 I1 Ir1 P1 C6 127.38(17) . . . . ?
 I1 Ir1 C2 O1 -83(3) . . . . ?
 C1 Ir1 C14 C9 -69.5(3) . . . . ?
 C1 Ir1 C14 C13 107.5(3) . . . . ?
 C1 Ir1 N9 C16 -3.5(2) . . . . ?
 C1 Ir1 N9 C15 -118.4(2) . . . . ?
 C1 Ir1 N9 C25 124.1(3) . . . . ?
 C1 Ir1 P1 O2 67.27(15) . . . . ?
 C1 Ir1 P1 C3 178.77(18) . . . . ?
 C1 Ir1 P1 C6 -49.6(2) . . . . ?
 C1 Ir1 C2 O1 99(4) . . . . ?
 N9 Ir1 C14 C9 -161.9(3) . . . . ?
 N9 Ir1 C14 C13 15.1(3) . . . . ?
 N9 Ir1 P1 O2 -18.2(2) . . . . ?
 N9 Ir1 P1 C3 93.3(2) . . . . ?
 N9 Ir1 P1 C6 -135.0(2) . . . . ?
 N9 Ir1 C2 O1 -169(3) . . . . ?
 N9 C16 C17 O3 -84.4(4) . . . . ?
 C24 O6 C23 C22 -172.1(3) . . . . ?
 C16 N9 C15 C13 -76.1(4) . . . . ?
 C16 N9 C25 C24 70.2(4) . . . . ?
 C15 N9 C16 C17 -67.5(4) . . . . ?
 C15 N9 C25 C24 -172.4(3) . . . . ?
 C15 C13 C12 C11 178.5(4) . . . . ?
 C25 N9 C16 C17 49.5(4) . . . . ?
 C25 N9 C15 C13 164.8(3) . . . . ?
 C25 C24 O6 C23 -178.6(3) . . . . ?
 C12 C13 C15 N9 148.2(4) . . . . ?
 P1 Ir1 C14 C9 16.0(3) . . . . ?
 P1 Ir1 C14 C13 -167.0(3) . . . . ?
 P1 Ir1 N9 C16 80.4(3) . . . . ?
 P1 Ir1 N9 C15 -34.5(3) . . . . ?
 P1 Ir1 N9 C25 -152.01(19) . . . . ?
 P1 Ir1 C2 O1 14(4) . . . . ?
 O2 C9 C14 Ir1 -1.7(4) . . . . ?
 O2 C9 C14 C13 -178.7(3) . . . . ?
 O2 P1 C3 C5 -168.0(3) . . . . ?
 O2 P1 C3 C4 -41.5(3) . . . . ?
 O2 P1 C6 C8 -153.1(3) . . . . ?
 O2 P1 C6 C7 -24.4(3) . . . . ?
 C3 P1 O2 C9 -92.3(2) . . . . ?
 C3 P1 C6 C8 101.5(3) . . . . ?
 C3 P1 C6 C7 -129.7(3) . . . . ?
 C6 P1 O2 C9 160.7(2) . . . . ?
 C6 P1 C3 C5 -61.9(3) . . . . ?
 C6 P1 C3 C4 64.6(3) . . . . ?
 C2 Ir1 C14 C9 10(3) . . . . ?
 C2 Ir1 C14 C13 -173(3) . . . . ?
 C2 Ir1 N9 C16 -94.6(2) . . . . ?
 C2 Ir1 N9 C15 150.5(2) . . . . ?
 C2 Ir1 N9 C25 33.0(3) . . . . ?
 C2 Ir1 P1 O2 156.93(15) . . . . ?
 C2 Ir1 P1 C3 -91.57(18) . . . . ?
 C2 Ir1 P1 C6 40.1(2) . . . . ?
 C19 O4 C20 C21 -83.5(4) . . . . ?
 C18 O3 C17 C16 173.3(3) . . . . ?
 C18 C19 O4 C20 176.1(3) . . . . ?
 C17 O3 C18 C19 -167.2(3) . . . . ?
 O6 C24 C25 N9 -160.1(3) . . . . ?
 O5 C22 C23 O6 61.3(4) . . . . ?
 O4 C19 C18 O3 -72.8(4) . . . . ?
 O4 C20 C21 O5 78.2(4) . . . . ?
 C21 O5 C22 C23 73.6(4) . . . . ?
 C22 O5 C21 C20 -164.1(3) . . . . ?

_olex2_submission_original_sample_id JG128
_olex2_submission_special_instructions 'No special instructions were received'


#===END

data_x1604007
_audit_creation_date              2016-04-28
_audit_creation_method
;
Olex2 1.2
(compiled 2016.02.19 svn.r3266 for OlexSys, GUI svn.r5155)
;
_publ_contact_author_address      ?
_publ_contact_author_email        ?
_publ_contact_author_name         ''
_publ_contact_author_phone        ?
_publ_section_references
;
Bourhis, L.J., Dolomanov, O.V., Gildea, R.J., Howard, J.A.K., Puschmann, H.
 (2015). Acta Cryst. A71, 59-75.

Dolomanov, O.V., Bourhis, L.J., Gildea, R.J, Howard, J.A.K. & Puschmann, H.
 (2009), J. Appl. Cryst. 42, 339-341.

Sheldrick, G.M. (2008). Acta Cryst. A64, 112-122.
;
_chemical_name_common             ?
_chemical_name_systematic         ?
_chemical_formula_moiety          'C25 H41 Ir N O7 P'
_chemical_formula_sum             'C25 H41 Ir N O7 P'
_chemical_formula_weight          690.76
_chemical_melting_point           ?
loop_
  _atom_type_symbol
  _atom_type_description
  _atom_type_scat_dispersion_real
  _atom_type_scat_dispersion_imag
  _atom_type_scat_source
 'C' 'C' 0.0181 0.0091 'International Tables Vol C Tables 4.2.6.8 and 6.1.1.4'
 'H' 'H' 0.0000 0.0000 'International Tables Vol C Tables 4.2.6.8 and 6.1.1.4'
 'Ir' 'Ir' -4.7710 6.5667
 'International Tables Vol C Tables 4.2.6.8 and 6.1.1.4'
 'N' 'N' 0.0311 0.0180 'International Tables Vol C Tables 4.2.6.8 and 6.1.1.4'
 'O' 'O' 0.0492 0.0322 'International Tables Vol C Tables 4.2.6.8 and 6.1.1.4'
 'P' 'P' 0.2955 0.4335 'International Tables Vol C Tables 4.2.6.8 and 6.1.1.4'

_shelx_space_group_comment
;
The symmetry employed for this shelxl refinement is uniquely defined
by the following loop, which should always be used as a source of
symmetry information in preference to the above space-group names.
They are only intended as comments.
;
_space_group_crystal_system       'monoclinic'
_space_group_IT_number            14
_space_group_name_H-M_alt         'P 1 21/n 1'
_space_group_name_Hall            '-P 2yn'
loop_
  _space_group_symop_operation_xyz
 'x, y, z'
 '-x+1/2, y+1/2, -z+1/2'
 '-x, -y, -z'
 'x-1/2, -y-1/2, z-1/2'

_cell_length_a                    18.127(2)
_cell_length_b                    7.9807(11)
_cell_length_c                    19.276(3)
_cell_angle_alpha                 90
_cell_angle_beta                  102.644(7)
_cell_angle_gamma                 90
_cell_volume                      2721.0(6)
_cell_formula_units_Z             4
_cell_measurement_reflns_used     9842
_cell_measurement_temperature     100
_cell_measurement_theta_max       72.00
_cell_measurement_theta_min       3.03
_shelx_estimated_absorpt_T_max    0.468
_shelx_estimated_absorpt_T_min    0.195
_exptl_absorpt_coefficient_mu     10.416
_exptl_absorpt_correction_T_max   0.5645
_exptl_absorpt_correction_T_min   0.2234
_exptl_absorpt_correction_type    numerical
_exptl_absorpt_process_details
;
SADABS-2014/5 (Bruker,2014/5) was used for absorption correction.
wR2(int) was 0.0750 before and 0.0624 after correction.
The Ratio of minimum to maximum transmission is 0.3957.
The \l/2 correction factor is 0.00150.
;
_exptl_absorpt_special_details    ?
_exptl_crystal_colour             'clear yellow'
_exptl_crystal_colour_lustre      clear
_exptl_crystal_colour_primary     yellow
_exptl_crystal_density_diffrn     1.686
_exptl_crystal_density_meas       ?
_exptl_crystal_density_method     ?
_exptl_crystal_description        plate
_exptl_crystal_F_000              1384
_exptl_crystal_size_max           0.233
_exptl_crystal_size_mid           0.134
_exptl_crystal_size_min           0.086
_exptl_transmission_factor_max    ?
_exptl_transmission_factor_min    ?
_diffrn_reflns_av_R_equivalents   0.0483
_diffrn_reflns_av_unetI/netI      0.0256
_diffrn_reflns_Laue_measured_fraction_full 0.998
_diffrn_reflns_Laue_measured_fraction_max 0.993
_diffrn_reflns_limit_h_max        22
_diffrn_reflns_limit_h_min        -22
_diffrn_reflns_limit_k_max        9
_diffrn_reflns_limit_k_min        -9
_diffrn_reflns_limit_l_max        23
_diffrn_reflns_limit_l_min        -23
_diffrn_reflns_number             41167
_diffrn_reflns_point_group_measured_fraction_full 0.998
_diffrn_reflns_point_group_measured_fraction_max 0.993
_diffrn_reflns_theta_full         67.679
_diffrn_reflns_theta_max          72.308
_diffrn_reflns_theta_min          3.032
_diffrn_ambient_temperature       100
_diffrn_detector_area_resol_mean  ?
_diffrn_measured_fraction_theta_full 0.998
_diffrn_measured_fraction_theta_max 0.993
_diffrn_measurement_device_type   'Bruker APEX-II CCD'
_diffrn_measurement_method        '\f and \w scans'
_diffrn_radiation_type            CuK\a
_diffrn_radiation_wavelength      1.54178
_diffrn_source                    ?
_diffrn_special_details           ?
_diffrn_standards_number          0
_reflns_Friedel_coverage          0.000
_reflns_Friedel_fraction_full     .
_reflns_Friedel_fraction_max      .
_reflns_number_gt                 5017
_reflns_number_total              5320
_reflns_special_details
;
 Reflections were merged by SHELXL according to the crystal
 class for the calculation of statistics and refinement.
 
 _reflns_Friedel_fraction is defined as the number of unique
 Friedel pairs measured divided by the number that would be
 possible theoretically, ignoring centric projections and
 systematic absences.
;
_reflns_threshold_expression      'I > 2\s(I)'
_computing_cell_refinement        ?
_computing_data_collection        ?
_computing_data_reduction         ?
_computing_molecular_graphics     'Olex2 (Dolomanov et al., 2009)'
_computing_publication_material   'Olex2 (Dolomanov et al., 2009)'
_computing_structure_refinement   'XL (Sheldrick, 2008)'
_computing_structure_solution     'olex2.solve (Bourhis et al., 2015)'
_refine_diff_density_max          2.071
_refine_diff_density_min          -1.046
_refine_diff_density_rms          0.113
_refine_ls_extinction_coef        .
_refine_ls_extinction_method      none
_refine_ls_goodness_of_fit_ref    1.080
_refine_ls_hydrogen_treatment     constr
_refine_ls_matrix_type            full
_refine_ls_number_parameters      321
_refine_ls_number_reflns          5320
_refine_ls_number_restraints      0
_refine_ls_R_factor_all           0.0284
_refine_ls_R_factor_gt            0.0265
_refine_ls_restrained_S_all       1.080
_refine_ls_shift/su_max           0.001
_refine_ls_shift/su_mean          0.000
_refine_ls_structure_factor_coef  Fsqd
_refine_ls_weighting_details
'w=1/[\s^2^(Fo^2^)+(0.0237P)^2^+8.4568P] where P=(Fo^2^+2Fc^2^)/3'
_refine_ls_weighting_scheme       calc
_refine_ls_wR_factor_gt           0.0626
_refine_ls_wR_factor_ref          0.0637
_refine_special_details           ?
_olex2_refinement_description
;
1. Fixed Uiso
 At 1.2 times of:
  All C(H) groups, All C(H,H) groups
 At 1.5 times of:
  All C(H,H,H) groups
2.a Ternary CH refined with riding coordinates:
 C5(H5), C8(H8)
2.b Secondary CH2 refined with riding coordinates:
 C20(H20A,H20B), C22(H22A,H22B), C23(H23A,H23B), C25(H25A,H25B), C26(H26A,
 H26B), C28(H28A,H28B), C29(H29A,H29B), C31(H31A,H31B), C32(H32A,H32B),
 C34(H34A,H34B), C35(H35A,H35B)
2.c Aromatic/amide H refined with riding coordinates:
 C17(H17), C18(H18)
2.d Idealised Me refined as rotating group:
 C6(H6A,H6B,H6C), C7(H7A,H7B,H7C), C9(H9A,H9B,H9C), C10(H10A,H10B,H10C),
 C16(H16A,H16B,H16C)
;
_atom_sites_solution_hydrogens    geom
_atom_sites_solution_primary      iterative
_atom_sites_solution_secondary    ?
loop_
  _atom_site_label
  _atom_site_type_symbol
  _atom_site_fract_x
  _atom_site_fract_y
  _atom_site_fract_z
  _atom_site_U_iso_or_equiv
  _atom_site_adp_type
  _atom_site_occupancy
  _atom_site_site_symmetry_order
  _atom_site_calc_flag
  _atom_site_refinement_flags_posn
  _atom_site_refinement_flags_adp
  _atom_site_refinement_flags_occupancy
  _atom_site_disorder_assembly
  _atom_site_disorder_group
 Ir1 Ir 0.46435(2) 0.32029(2) 0.17558(2) 0.01631(6) Uani 1 1 d . . . . .
 P2 P 0.37927(5) 0.22144(11) 0.08590(5) 0.01652(17) Uani 1 1 d . . . . .
 C3 C 0.5487(2) 0.2142(5) 0.1536(2) 0.0241(8) Uani 1 1 d . . . . .
 O4 O 0.59749(15) 0.1441(4) 0.13694(17) 0.0347(7) Uani 1 1 d . . . . .
 C5 C 0.3857(2) 0.2866(4) -0.00384(19) 0.0210(7) Uani 1 1 d . . . . .
 H5 H 0.4318 0.2331 -0.0146 0.025 Uiso 1 1 calc R . . . .
 C6 C 0.3174(2) 0.2305(5) -0.0616(2) 0.0293(8) Uani 1 1 d . . . . .
 H6A H 0.3176 0.1081 -0.0658 0.044 Uiso 1 1 calc GR . . . .
 H6B H 0.3207 0.2809 -0.1072 0.044 Uiso 1 1 calc GR . . . .
 H6C H 0.2706 0.2667 -0.0487 0.044 Uiso 1 1 calc GR . . . .
 C7 C 0.3970(2) 0.4768(5) -0.0043(2) 0.0297(8) Uani 1 1 d . . . . .
 H7A H 0.3527 0.5328 0.0065 0.045 Uiso 1 1 calc GR . . . .
 H7B H 0.4034 0.5121 -0.0513 0.045 Uiso 1 1 calc GR . . . .
 H7C H 0.4422 0.5072 0.0316 0.045 Uiso 1 1 calc GR . . . .
 C8 C 0.3565(2) -0.0013(4) 0.07662(19) 0.0200(7) Uani 1 1 d . . . . .
 H8 H 0.3098 -0.0155 0.0383 0.024 Uiso 1 1 calc R . . A 1
 C9 C 0.4216(2) -0.0936(5) 0.0546(2) 0.0271(8) Uani 1 1 d . . . . .
 H9A H 0.4243 -0.0600 0.0063 0.041 Uiso 1 1 calc GR . . . .
 H9B H 0.4131 -0.2148 0.0558 0.041 Uiso 1 1 calc GR . . . .
 H9C H 0.4693 -0.0653 0.0875 0.041 Uiso 1 1 calc GR . . . .
 C10 C 0.3413(2) -0.0725(5) 0.1458(2) 0.0292(8) Uani 1 1 d . . . . .
 H10A H 0.3851 -0.0510 0.1847 0.044 Uiso 1 1 calc GR . . . .
 H10B H 0.3328 -0.1936 0.1407 0.044 Uiso 1 1 calc GR . . . .
 H10C H 0.2965 -0.0187 0.1564 0.044 Uiso 1 1 calc GR . . . .
 O11 O 0.29576(13) 0.3043(3) 0.09101(13) 0.0209(5) Uani 1 1 d . . . . .
 C12 C 0.36993(18) 0.4273(4) 0.19610(18) 0.0164(6) Uani 1 1 d . . . . .
 C13 C 0.30037(18) 0.4098(4) 0.14922(18) 0.0162(6) Uani 1 1 d . . . . .
 C14 C 0.23647(19) 0.4931(4) 0.16105(18) 0.0174(7) Uani 1 1 d . . . . .
 O15 O 0.16909(13) 0.4661(3) 0.11299(13) 0.0219(5) Uani 1 1 d . . . . .
 C16 C 0.1031(2) 0.5359(6) 0.1308(2) 0.0355(10) Uani 1 1 d . . . . .
 H16A H 0.0587 0.5095 0.0933 0.053 Uiso 1 1 calc GR . . . .
 H16B H 0.1087 0.6577 0.1355 0.053 Uiso 1 1 calc GR . . . .
 H16C H 0.0965 0.4883 0.1760 0.053 Uiso 1 1 calc GR . . . .
 C17 C 0.24454(19) 0.5957(4) 0.22028(19) 0.0189(7) Uani 1 1 d . . . . .
 H17 H 0.2020 0.6558 0.2283 0.023 Uiso 1 1 calc R . . . .
 C18 C 0.3140(2) 0.6125(4) 0.26844(19) 0.0208(7) Uani 1 1 d . . . . .
 H18 H 0.3184 0.6823 0.3091 0.025 Uiso 1 1 calc R . . . .
 C19 C 0.37629(19) 0.5271(4) 0.25656(18) 0.0179(7) Uani 1 1 d . . . . .
 C20 C 0.4531(2) 0.5217(5) 0.3065(2) 0.0239(8) Uani 1 1 d . . . . .
 H20A H 0.4632 0.6295 0.3321 0.029 Uiso 1 1 calc R . . . .
 H20B H 0.4542 0.4316 0.3420 0.029 Uiso 1 1 calc R . . . .
 N21 N 0.51300(16) 0.4896(4) 0.26471(16) 0.0208(6) Uani 1 1 d . . . . .
 C22 C 0.5266(2) 0.6561(5) 0.2337(3) 0.0382(11) Uani 1 1 d . . . . .
 H22A H 0.4789 0.6920 0.2016 0.046 Uiso 1 1 calc R . . . .
 H22B H 0.5382 0.7383 0.2731 0.046 Uiso 1 1 calc R . . . .
 C23 C 0.5856(3) 0.6655(7) 0.1950(3) 0.0440(11) Uani 1 1 d . . . . .
 H23A H 0.5737 0.7579 0.1601 0.053 Uiso 1 1 calc R . . . .
 H23B H 0.5859 0.5600 0.1681 0.053 Uiso 1 1 calc R . . . .
 O24 O 0.65976(18) 0.6924(5) 0.23808(19) 0.0501(10) Uani 1 1 d . . . . .
 C25 C 0.6825(3) 0.8529(7) 0.2632(3) 0.0523(14) Uani 1 1 d . . . . .
 H25A H 0.6375 0.9259 0.2584 0.063 Uiso 1 1 calc R . . . .
 H25B H 0.7157 0.9016 0.2340 0.063 Uiso 1 1 calc R . . . .
 C26 C 0.7234(3) 0.8481(7) 0.3386(4) 0.0543(15) Uani 1 1 d . . . . .
 H26A H 0.7636 0.7618 0.3448 0.065 Uiso 1 1 calc R . . . .
 H26B H 0.7478 0.9579 0.3521 0.065 Uiso 1 1 calc R . . . .
 O27 O 0.67278(18) 0.8106(4) 0.3838(2) 0.0451(8) Uani 1 1 d . . . . .
 C28 C 0.7094(3) 0.7977(6) 0.4570(3) 0.0552(15) Uani 1 1 d . . . . .
 H28A H 0.7205 0.9112 0.4773 0.066 Uiso 1 1 calc R . . . .
 H28B H 0.7579 0.7373 0.4616 0.066 Uiso 1 1 calc R . . . .
 C29 C 0.6613(3) 0.7082(7) 0.4961(3) 0.0531(14) Uani 1 1 d . . . . .
 H29A H 0.6826 0.7168 0.5479 0.064 Uiso 1 1 calc R . . . .
 H29B H 0.6100 0.7578 0.4859 0.064 Uiso 1 1 calc R . . . .
 O30 O 0.65759(17) 0.5347(4) 0.47436(16) 0.0395(7) Uani 1 1 d . . . . .
 C31 C 0.6143(3) 0.4395(8) 0.5113(3) 0.0533(14) Uani 1 1 d . . . . .
 H31A H 0.5663 0.4988 0.5114 0.064 Uiso 1 1 calc R . . . .
 H31B H 0.6420 0.4259 0.5613 0.064 Uiso 1 1 calc R . . . .
 C32 C 0.5971(3) 0.2681(7) 0.4773(3) 0.0482(13) Uani 1 1 d . . . . .
 H32A H 0.6451 0.2161 0.4720 0.058 Uiso 1 1 calc R . . . .
 H32B H 0.5754 0.1964 0.5098 0.058 Uiso 1 1 calc R . . . .
 O33 O 0.54621(16) 0.2705(4) 0.40975(18) 0.0405(8) Uani 1 1 d . . . . .
 C34 C 0.5778(2) 0.2638(6) 0.3488(3) 0.0365(10) Uani 1 1 d . . . . .
 H34A H 0.5463 0.1886 0.3134 0.044 Uiso 1 1 calc R . . . .
 H34B H 0.6288 0.2132 0.3625 0.044 Uiso 1 1 calc R . . . .
 C35 C 0.5846(2) 0.4322(5) 0.3133(2) 0.0278(8) Uani 1 1 d . . . . .
 H35A H 0.6006 0.5178 0.3508 0.033 Uiso 1 1 calc R . . . .
 H35B H 0.6246 0.4240 0.2859 0.033 Uiso 1 1 calc R . . . .

loop_
  _atom_site_aniso_label
  _atom_site_aniso_U_11
  _atom_site_aniso_U_22
  _atom_site_aniso_U_33
  _atom_site_aniso_U_23
  _atom_site_aniso_U_13
  _atom_site_aniso_U_12
 Ir1 0.01159(8) 0.01837(8) 0.01811(8) -0.00121(5) 0.00134(5) 0.00141(5)
 P2 0.0158(4) 0.0162(4) 0.0170(4) -0.0028(3) 0.0025(3) 0.0029(3)
 C3 0.0185(17) 0.0263(19) 0.0258(18) 0.0024(15) 0.0010(15) 0.0013(15)
 O4 0.0214(14) 0.0402(17) 0.0438(17) -0.0015(14) 0.0103(13) 0.0108(12)
 C5 0.0242(18) 0.0181(17) 0.0203(17) 0.0017(14) 0.0042(14) 0.0035(14)
 C6 0.036(2) 0.028(2) 0.0200(18) 0.0030(15) -0.0024(16) -0.0029(17)
 C7 0.036(2) 0.0195(18) 0.031(2) 0.0039(16) 0.0020(17) -0.0006(16)
 C8 0.0222(17) 0.0175(17) 0.0194(16) -0.0026(13) 0.0026(14) 0.0001(13)
 C9 0.034(2) 0.0146(16) 0.035(2) -0.0005(15) 0.0141(17) 0.0021(15)
 C10 0.033(2) 0.029(2) 0.0273(19) 0.0050(16) 0.0107(17) 0.0000(16)
 O11 0.0156(11) 0.0237(13) 0.0212(12) -0.0082(10) -0.0006(10) 0.0040(9)
 C12 0.0128(15) 0.0172(16) 0.0186(16) 0.0017(13) 0.0022(13) 0.0026(12)
 C13 0.0152(15) 0.0159(15) 0.0177(16) -0.0011(13) 0.0039(13) -0.0001(12)
 C14 0.0158(15) 0.0168(16) 0.0195(16) 0.0043(13) 0.0038(13) 0.0015(13)
 O15 0.0130(11) 0.0278(13) 0.0234(12) -0.0034(11) 0.0003(10) 0.0040(10)
 C16 0.0165(18) 0.049(3) 0.040(2) -0.007(2) 0.0027(17) 0.0084(17)
 C17 0.0196(16) 0.0166(16) 0.0219(17) -0.0002(13) 0.0078(14) 0.0014(13)
 C18 0.0253(18) 0.0188(16) 0.0188(16) -0.0037(14) 0.0059(14) 0.0003(14)
 C19 0.0187(16) 0.0169(16) 0.0179(16) -0.0007(13) 0.0033(13) -0.0024(13)
 C20 0.0207(17) 0.0261(19) 0.0225(17) -0.0102(15) -0.0004(14) 0.0000(14)
 N21 0.0160(14) 0.0187(15) 0.0248(15) -0.0013(12) -0.0018(12) -0.0033(11)
 C22 0.023(2) 0.024(2) 0.064(3) 0.014(2) 0.000(2) -0.0037(16)
 C23 0.046(3) 0.051(3) 0.035(2) 0.001(2) 0.008(2) -0.005(2)
 O24 0.0287(16) 0.069(2) 0.047(2) 0.0234(18) -0.0029(15) -0.0232(16)
 C25 0.049(3) 0.044(3) 0.071(4) 0.021(3) 0.029(3) 0.007(2)
 C26 0.033(2) 0.036(3) 0.096(5) -0.016(3) 0.019(3) -0.011(2)
 O27 0.0319(16) 0.0427(19) 0.054(2) 0.0130(16) -0.0059(15) 0.0019(14)
 C28 0.054(3) 0.033(3) 0.061(3) -0.008(2) -0.024(3) 0.001(2)
 C29 0.065(3) 0.053(3) 0.031(2) -0.013(2) -0.012(2) 0.011(3)
 O30 0.0364(16) 0.0522(19) 0.0271(15) -0.0018(14) 0.0010(13) 0.0019(15)
 C31 0.037(3) 0.083(4) 0.035(2) 0.016(3) -0.001(2) -0.004(3)
 C32 0.032(2) 0.054(3) 0.051(3) 0.026(3) -0.005(2) -0.011(2)
 O33 0.0197(13) 0.0479(19) 0.0475(19) 0.0219(15) -0.0065(13) -0.0045(13)
 C34 0.025(2) 0.029(2) 0.048(3) 0.0062(19) -0.0106(19) 0.0007(17)
 C35 0.0171(17) 0.027(2) 0.033(2) -0.0005(16) -0.0069(15) -0.0023(15)

_geom_special_details
;
 All esds (except the esd in the dihedral angle between two l.s. planes)
 are estimated using the full covariance matrix.  The cell esds are taken
 into account individually in the estimation of esds in distances, angles
 and torsion angles; correlations between esds in cell parameters are only
 used when they are defined by crystal symmetry.  An approximate (isotropic)
 treatment of cell esds is used for estimating esds involving l.s. planes.
;
loop_
  _geom_bond_atom_site_label_1
  _geom_bond_atom_site_label_2
  _geom_bond_distance
  _geom_bond_site_symmetry_2
  _geom_bond_publ_flag
 Ir1 P2 2.1960(9) . ?
 Ir1 C3 1.875(4) . ?
 Ir1 C12 2.028(3) . ?
 Ir1 N21 2.212(3) . ?
 P2 C5 1.834(4) . ?
 P2 C8 1.825(4) . ?
 P2 O11 1.674(2) . ?
 C3 O4 1.151(5) . ?
 C5 H5 1.0000 . ?
 C5 C6 1.539(5) . ?
 C5 C7 1.532(5) . ?
 C6 H6A 0.9800 . ?
 C6 H6B 0.9800 . ?
 C6 H6C 0.9800 . ?
 C7 H7A 0.9800 . ?
 C7 H7B 0.9800 . ?
 C7 H7C 0.9800 . ?
 C8 H8 1.0000 . ?
 C8 C9 1.530(5) . ?
 C8 C10 1.529(5) . ?
 C9 H9A 0.9800 . ?
 C9 H9B 0.9800 . ?
 C9 H9C 0.9800 . ?
 C10 H10A 0.9800 . ?
 C10 H10B 0.9800 . ?
 C10 H10C 0.9800 . ?
 O11 C13 1.391(4) . ?
 C12 C13 1.388(5) . ?
 C12 C19 1.396(5) . ?
 C13 C14 1.397(5) . ?
 C14 O15 1.379(4) . ?
 C14 C17 1.386(5) . ?
 O15 C16 1.429(4) . ?
 C16 H16A 0.9800 . ?
 C16 H16B 0.9800 . ?
 C16 H16C 0.9800 . ?
 C17 H17 0.9500 . ?
 C17 C18 1.398(5) . ?
 C18 H18 0.9500 . ?
 C18 C19 1.379(5) . ?
 C19 C20 1.509(5) . ?
 C20 H20A 0.9900 . ?
 C20 H20B 0.9900 . ?
 C20 N21 1.509(5) . ?
 N21 C22 1.499(5) . ?
 N21 C35 1.496(5) . ?
 C22 H22A 0.9900 . ?
 C22 H22B 0.9900 . ?
 C22 C23 1.433(7) . ?
 C23 H23A 0.9900 . ?
 C23 H23B 0.9900 . ?
 C23 O24 1.434(6) . ?
 O24 C25 1.399(7) . ?
 C25 H25A 0.9900 . ?
 C25 H25B 0.9900 . ?
 C25 C26 1.481(9) . ?
 C26 H26A 0.9900 . ?
 C26 H26B 0.9900 . ?
 C26 O27 1.428(7) . ?
 O27 C28 1.426(6) . ?
 C28 H28A 0.9900 . ?
 C28 H28B 0.9900 . ?
 C28 C29 1.458(9) . ?
 C29 H29A 0.9900 . ?
 C29 H29B 0.9900 . ?
 C29 O30 1.444(6) . ?
 O30 C31 1.395(6) . ?
 C31 H31A 0.9900 . ?
 C31 H31B 0.9900 . ?
 C31 C32 1.520(9) . ?
 C32 H32A 0.9900 . ?
 C32 H32B 0.9900 . ?
 C32 O33 1.421(6) . ?
 O33 C34 1.417(6) . ?
 C34 H34A 0.9900 . ?
 C34 H34B 0.9900 . ?
 C34 C35 1.525(6) . ?
 C35 H35A 0.9900 . ?
 C35 H35B 0.9900 . ?

loop_
  _geom_angle_atom_site_label_1
  _geom_angle_atom_site_label_2
  _geom_angle_atom_site_label_3
  _geom_angle
  _geom_angle_site_symmetry_1
  _geom_angle_site_symmetry_3
  _geom_angle_publ_flag
 P2 Ir1 N21 157.35(8) . . ?
 C3 Ir1 P2 97.30(12) . . ?
 C3 Ir1 C12 177.25(15) . . ?
 C3 Ir1 N21 104.18(14) . . ?
 C12 Ir1 P2 80.06(10) . . ?
 C12 Ir1 N21 78.54(12) . . ?
 C5 P2 Ir1 117.51(12) . . ?
 C8 P2 Ir1 122.15(12) . . ?
 C8 P2 C5 104.09(16) . . ?
 O11 P2 Ir1 107.45(9) . . ?
 O11 P2 C5 100.86(15) . . ?
 O11 P2 C8 101.67(15) . . ?
 O4 C3 Ir1 175.9(4) . . ?
 P2 C5 H5 107.6 . . ?
 C6 C5 P2 113.2(3) . . ?
 C6 C5 H5 107.6 . . ?
 C7 C5 P2 108.8(3) . . ?
 C7 C5 H5 107.6 . . ?
 C7 C5 C6 111.8(3) . . ?
 C5 C6 H6A 109.5 . . ?
 C5 C6 H6B 109.5 . . ?
 C5 C6 H6C 109.5 . . ?
 H6A C6 H6B 109.5 . . ?
 H6A C6 H6C 109.5 . . ?
 H6B C6 H6C 109.5 . . ?
 C5 C7 H7A 109.5 . . ?
 C5 C7 H7B 109.5 . . ?
 C5 C7 H7C 109.5 . . ?
 H7A C7 H7B 109.5 . . ?
 H7A C7 H7C 109.5 . . ?
 H7B C7 H7C 109.5 . . ?
 P2 C8 H8 108.6 . . ?
 C9 C8 P2 108.9(2) . . ?
 C9 C8 H8 108.6 . . ?
 C10 C8 P2 110.9(3) . . ?
 C10 C8 H8 108.6 . . ?
 C10 C8 C9 111.1(3) . . ?
 C8 C9 H9A 109.5 . . ?
 C8 C9 H9B 109.5 . . ?
 C8 C9 H9C 109.5 . . ?
 H9A C9 H9B 109.5 . . ?
 H9A C9 H9C 109.5 . . ?
 H9B C9 H9C 109.5 . . ?
 C8 C10 H10A 109.5 . . ?
 C8 C10 H10B 109.5 . . ?
 C8 C10 H10C 109.5 . . ?
 H10A C10 H10B 109.5 . . ?
 H10A C10 H10C 109.5 . . ?
 H10B C10 H10C 109.5 . . ?
 C13 O11 P2 113.0(2) . . ?
 C13 C12 Ir1 121.1(2) . . ?
 C13 C12 C19 119.9(3) . . ?
 C19 C12 Ir1 119.0(2) . . ?
 O11 C13 C14 120.9(3) . . ?
 C12 C13 O11 118.1(3) . . ?
 C12 C13 C14 120.9(3) . . ?
 O15 C14 C13 117.4(3) . . ?
 O15 C14 C17 124.3(3) . . ?
 C17 C14 C13 118.3(3) . . ?
 C14 O15 C16 116.3(3) . . ?
 O15 C16 H16A 109.5 . . ?
 O15 C16 H16B 109.5 . . ?
 O15 C16 H16C 109.5 . . ?
 H16A C16 H16B 109.5 . . ?
 H16A C16 H16C 109.5 . . ?
 H16B C16 H16C 109.5 . . ?
 C14 C17 H17 119.3 . . ?
 C14 C17 C18 121.4(3) . . ?
 C18 C17 H17 119.3 . . ?
 C17 C18 H18 120.2 . . ?
 C19 C18 C17 119.6(3) . . ?
 C19 C18 H18 120.2 . . ?
 C12 C19 C20 114.3(3) . . ?
 C18 C19 C12 120.0(3) . . ?
 C18 C19 C20 125.6(3) . . ?
 C19 C20 H20A 109.7 . . ?
 C19 C20 H20B 109.7 . . ?
 H20A C20 H20B 108.2 . . ?
 N21 C20 C19 109.6(3) . . ?
 N21 C20 H20A 109.7 . . ?
 N21 C20 H20B 109.7 . . ?
 C20 N21 Ir1 107.9(2) . . ?
 C22 N21 Ir1 107.7(3) . . ?
 C22 N21 C20 105.2(3) . . ?
 C35 N21 Ir1 116.3(2) . . ?
 C35 N21 C20 110.2(3) . . ?
 C35 N21 C22 108.9(3) . . ?
 N21 C22 H22A 107.9 . . ?
 N21 C22 H22B 107.9 . . ?
 H22A C22 H22B 107.2 . . ?
 C23 C22 N21 117.4(4) . . ?
 C23 C22 H22A 107.9 . . ?
 C23 C22 H22B 107.9 . . ?
 C22 C23 H23A 108.6 . . ?
 C22 C23 H23B 108.6 . . ?
 C22 C23 O24 114.7(4) . . ?
 H23A C23 H23B 107.6 . . ?
 O24 C23 H23A 108.6 . . ?
 O24 C23 H23B 108.6 . . ?
 C25 O24 C23 120.3(4) . . ?
 O24 C25 H25A 109.4 . . ?
 O24 C25 H25B 109.4 . . ?
 O24 C25 C26 111.2(4) . . ?
 H25A C25 H25B 108.0 . . ?
 C26 C25 H25A 109.4 . . ?
 C26 C25 H25B 109.4 . . ?
 C25 C26 H26A 109.5 . . ?
 C25 C26 H26B 109.5 . . ?
 H26A C26 H26B 108.1 . . ?
 O27 C26 C25 110.7(4) . . ?
 O27 C26 H26A 109.5 . . ?
 O27 C26 H26B 109.5 . . ?
 C28 O27 C26 113.3(4) . . ?
 O27 C28 H28A 109.6 . . ?
 O27 C28 H28B 109.6 . . ?
 O27 C28 C29 110.3(4) . . ?
 H28A C28 H28B 108.1 . . ?
 C29 C28 H28A 109.6 . . ?
 C29 C28 H28B 109.6 . . ?
 C28 C29 H29A 110.0 . . ?
 C28 C29 H29B 110.0 . . ?
 H29A C29 H29B 108.4 . . ?
 O30 C29 C28 108.3(4) . . ?
 O30 C29 H29A 110.0 . . ?
 O30 C29 H29B 110.0 . . ?
 C31 O30 C29 111.7(4) . . ?
 O30 C31 H31A 109.5 . . ?
 O30 C31 H31B 109.5 . . ?
 O30 C31 C32 110.8(4) . . ?
 H31A C31 H31B 108.1 . . ?
 C32 C31 H31A 109.5 . . ?
 C32 C31 H31B 109.5 . . ?
 C31 C32 H32A 108.6 . . ?
 C31 C32 H32B 108.6 . . ?
 H32A C32 H32B 107.6 . . ?
 O33 C32 C31 114.5(4) . . ?
 O33 C32 H32A 108.6 . . ?
 O33 C32 H32B 108.6 . . ?
 C34 O33 C32 117.4(3) . . ?
 O33 C34 H34A 108.5 . . ?
 O33 C34 H34B 108.5 . . ?
 O33 C34 C35 115.1(4) . . ?
 H34A C34 H34B 107.5 . . ?
 C35 C34 H34A 108.5 . . ?
 C35 C34 H34B 108.5 . . ?
 N21 C35 C34 114.0(3) . . ?
 N21 C35 H35A 108.8 . . ?
 N21 C35 H35B 108.8 . . ?
 C34 C35 H35A 108.8 . . ?
 C34 C35 H35B 108.8 . . ?
 H35A C35 H35B 107.7 . . ?

loop_
  _geom_torsion_atom_site_label_1
  _geom_torsion_atom_site_label_2
  _geom_torsion_atom_site_label_3
  _geom_torsion_atom_site_label_4
  _geom_torsion
  _geom_torsion_site_symmetry_1
  _geom_torsion_site_symmetry_2
  _geom_torsion_site_symmetry_3
  _geom_torsion_site_symmetry_4
  _geom_torsion_publ_flag
 Ir1 P2 C5 C6 -172.0(2) . . . . ?
 Ir1 P2 C5 C7 -47.0(3) . . . . ?
 Ir1 P2 C8 C9 -73.1(3) . . . . ?
 Ir1 P2 C8 C10 49.5(3) . . . . ?
 Ir1 P2 O11 C13 -0.8(2) . . . . ?
 Ir1 C12 C13 O11 5.8(4) . . . . ?
 Ir1 C12 C13 C14 -175.5(2) . . . . ?
 Ir1 C12 C19 C18 174.5(3) . . . . ?
 Ir1 C12 C19 C20 -9.1(4) . . . . ?
 Ir1 N21 C22 C23 -69.4(4) . . . . ?
 Ir1 N21 C35 C34 -58.5(4) . . . . ?
 P2 O11 C13 C12 -2.8(4) . . . . ?
 P2 O11 C13 C14 178.5(3) . . . . ?
 C5 P2 C8 C9 63.0(3) . . . . ?
 C5 P2 C8 C10 -174.5(3) . . . . ?
 C5 P2 O11 C13 -124.4(2) . . . . ?
 C8 P2 C5 C6 49.5(3) . . . . ?
 C8 P2 C5 C7 174.5(3) . . . . ?
 C8 P2 O11 C13 128.6(2) . . . . ?
 O11 P2 C5 C6 -55.6(3) . . . . ?
 O11 P2 C5 C7 69.3(3) . . . . ?
 O11 P2 C8 C9 167.5(2) . . . . ?
 O11 P2 C8 C10 -70.0(3) . . . . ?
 O11 C13 C14 O15 0.2(5) . . . . ?
 O11 C13 C14 C17 179.6(3) . . . . ?
 C12 C13 C14 O15 -178.4(3) . . . . ?
 C12 C13 C14 C17 0.9(5) . . . . ?
 C12 C19 C20 N21 30.0(4) . . . . ?
 C13 C12 C19 C18 -2.1(5) . . . . ?
 C13 C12 C19 C20 174.3(3) . . . . ?
 C13 C14 O15 C16 172.6(3) . . . . ?
 C13 C14 C17 C18 -1.8(5) . . . . ?
 C14 C17 C18 C19 0.8(5) . . . . ?
 O15 C14 C17 C18 177.5(3) . . . . ?
 C17 C14 O15 C16 -6.8(5) . . . . ?
 C17 C18 C19 C12 1.2(5) . . . . ?
 C17 C18 C19 C20 -174.8(3) . . . . ?
 C18 C19 C20 N21 -153.8(3) . . . . ?
 C19 C12 C13 O11 -177.7(3) . . . . ?
 C19 C12 C13 C14 1.0(5) . . . . ?
 C19 C20 N21 Ir1 -34.8(3) . . . . ?
 C19 C20 N21 C22 80.0(4) . . . . ?
 C19 C20 N21 C35 -162.8(3) . . . . ?
 C20 N21 C22 C23 175.7(4) . . . . ?
 C20 N21 C35 C34 64.7(4) . . . . ?
 N21 C22 C23 O24 -84.7(5) . . . . ?
 C22 N21 C35 C34 179.6(4) . . . . ?
 C22 C23 O24 C25 -79.2(6) . . . . ?
 C23 O24 C25 C26 136.8(4) . . . . ?
 O24 C25 C26 O27 -70.7(5) . . . . ?
 C25 C26 O27 C28 177.7(4) . . . . ?
 C26 O27 C28 C29 -161.6(4) . . . . ?
 O27 C28 C29 O30 69.7(5) . . . . ?
 C28 C29 O30 C31 178.1(4) . . . . ?
 C29 O30 C31 C32 168.0(4) . . . . ?
 O30 C31 C32 O33 -69.5(5) . . . . ?
 C31 C32 O33 C34 98.5(5) . . . . ?
 C32 O33 C34 C35 -99.0(4) . . . . ?
 O33 C34 C35 N21 -81.9(4) . . . . ?
 C35 N21 C22 C23 57.6(5) . . . . ?

_shelx_res_file
;
    x1604007.res created by SHELXL-2014/7

TITL
CELL 1.54178 18.1271 7.9807 19.2759 90 102.644 90
ZERR 4 0.0024 0.0011 0.0026 0 0.0066 0
LATT 1
SYMM 0.5-X,0.5+Y,0.5-Z
SFAC C H Ir N O P
UNIT 100 164 4 4 28 4

L.S. 8
PLAN  5
SIZE 0.086 0.134 0.233
TEMP -173.15
MORE -1
BOND $H
CONF
fmap 2
acta
OMIT -2 1 1
OMIT -12 7 13
OMIT -3 2 2
OMIT 2 0 2
OMIT 4 2 4
OMIT -2 1 8
OMIT -4 1 8
REM <olex2.extras>
REM <HklSrc "%.\\x1604007.hkl">
REM </olex2.extras>

WGHT    0.023700    8.456800
FVAR       0.08513
IR1   3    0.464352    0.320292    0.175580    11.00000    0.01159    0.01837 =
         0.01811   -0.00121    0.00134    0.00141
P2    6    0.379266    0.221435    0.085896    11.00000    0.01581    0.01623 =
         0.01701   -0.00283    0.00247    0.00294
C3    1    0.548669    0.214234    0.153634    11.00000    0.01849    0.02631 =
         0.02575    0.00240    0.00099    0.00129
O4    5    0.597488    0.144090    0.136943    11.00000    0.02139    0.04024 =
         0.04380   -0.00150    0.01029    0.01081
C5    1    0.385702    0.286586   -0.003837    11.00000    0.02419    0.01811 =
         0.02027    0.00170    0.00423    0.00347
AFIX  13
H5    2    0.431840    0.233097   -0.014553    11.00000   -1.20000
AFIX   0
C6    1    0.317434    0.230490   -0.061644    11.00000    0.03638    0.02763 =
         0.01997    0.00301   -0.00241   -0.00288
AFIX 137
H6A   2    0.317577    0.108119   -0.065841    11.00000   -1.50000
H6B   2    0.320670    0.280904   -0.107241    11.00000   -1.50000
H6C   2    0.270595    0.266735   -0.048650    11.00000   -1.50000
AFIX   0
C7    1    0.397033    0.476791   -0.004299    11.00000    0.03600    0.01951 =
         0.03120    0.00387    0.00202   -0.00060
AFIX 137
H7A   2    0.352748    0.532768    0.006497    11.00000   -1.50000
H7B   2    0.403410    0.512095   -0.051327    11.00000   -1.50000
H7C   2    0.442186    0.507175    0.031639    11.00000   -1.50000
AFIX   0
C8    1    0.356455   -0.001325    0.076616    11.00000    0.02215    0.01754 =
         0.01940   -0.00260    0.00262    0.00010
PART 1
AFIX  13
H8    2    0.309839   -0.015495    0.038257    11.00000   -1.20000
AFIX   0
PART 0
C9    1    0.421646   -0.093643    0.054567    11.00000    0.03425    0.01464 =
         0.03544   -0.00051    0.01414    0.00214
AFIX 137
H9A   2    0.424280   -0.060028    0.006270    11.00000   -1.50000
H9B   2    0.413140   -0.214772    0.055780    11.00000   -1.50000
H9C   2    0.469285   -0.065275    0.087525    11.00000   -1.50000
AFIX   0
C10   1    0.341342   -0.072548    0.145815    11.00000    0.03294    0.02945 =
         0.02727    0.00495    0.01075    0.00000
AFIX 137
H10A  2    0.385066   -0.050986    0.184738    11.00000   -1.50000
H10B  2    0.332818   -0.193612    0.140708    11.00000   -1.50000
H10C  2    0.296455   -0.018701    0.156355    11.00000   -1.50000
AFIX   0
O11   5    0.295765    0.304338    0.091012    11.00000    0.01563    0.02373 =
         0.02119   -0.00824   -0.00056    0.00396
C12   1    0.369932    0.427282    0.196099    11.00000    0.01277    0.01724 =
         0.01861    0.00173    0.00223    0.00256
C13   1    0.300375    0.409812    0.149224    11.00000    0.01521    0.01591 =
         0.01773   -0.00112    0.00389   -0.00012
C14   1    0.236466    0.493114    0.161047    11.00000    0.01585    0.01684 =
         0.01952    0.00426    0.00382    0.00152
O15   5    0.169089    0.466057    0.112985    11.00000    0.01296    0.02777 =
         0.02337   -0.00344    0.00033    0.00399
C16   1    0.103074    0.535887    0.130843    11.00000    0.01650    0.04890 =
         0.03955   -0.00710    0.00274    0.00844
AFIX 137
H16A  2    0.058711    0.509522    0.093276    11.00000   -1.50000
H16B  2    0.108712    0.657749    0.135529    11.00000   -1.50000
H16C  2    0.096519    0.488287    0.175971    11.00000   -1.50000
AFIX   0
C17   1    0.244544    0.595690    0.220281    11.00000    0.01964    0.01658 =
         0.02187   -0.00021    0.00784    0.00135
AFIX  43
H17   2    0.201959    0.655815    0.228319    11.00000   -1.20000
AFIX   0
C18   1    0.314050    0.612516    0.268441    11.00000    0.02528    0.01875 =
         0.01876   -0.00374    0.00587    0.00026
AFIX  43
H18   2    0.318377    0.682271    0.309070    11.00000   -1.20000
AFIX   0
C19   1    0.376290    0.527145    0.256558    11.00000    0.01871    0.01689 =
         0.01789   -0.00074    0.00333   -0.00238
C20   1    0.453065    0.521670    0.306464    11.00000    0.02066    0.02607 =
         0.02252   -0.01015   -0.00043   -0.00002
AFIX  23
H20A  2    0.463201    0.629549    0.332138    11.00000   -1.20000
H20B  2    0.454155    0.431572    0.341977    11.00000   -1.20000
AFIX   0
N21   4    0.513000    0.489568    0.264713    11.00000    0.01596    0.01866 =
         0.02477   -0.00135   -0.00183   -0.00332
C22   1    0.526636    0.656091    0.233748    11.00000    0.02279    0.02378 =
         0.06372    0.01419   -0.00016   -0.00373
AFIX  23
H22A  2    0.478893    0.692032    0.201623    11.00000   -1.20000
H22B  2    0.538154    0.738322    0.273092    11.00000   -1.20000
AFIX   0
C23   1    0.585561    0.665533    0.195008    11.00000    0.04583    0.05093 =
         0.03475    0.00098    0.00753   -0.00470
AFIX  23
H23A  2    0.573736    0.757899    0.160053    11.00000   -1.20000
H23B  2    0.585855    0.560006    0.168071    11.00000   -1.20000
AFIX   0
O24   5    0.659759    0.692379    0.238077    11.00000    0.02872    0.06936 =
         0.04700    0.02341   -0.00290   -0.02321
C25   1    0.682479    0.852939    0.263185    11.00000    0.04913    0.04434 =
         0.07053    0.02131    0.02869    0.00696
AFIX  23
H25A  2    0.637465    0.925855    0.258426    11.00000   -1.20000
H25B  2    0.715741    0.901569    0.233964    11.00000   -1.20000
AFIX   0
C26   1    0.723417    0.848121    0.338603    11.00000    0.03320    0.03585 =
         0.09603   -0.01625    0.01900   -0.01134
AFIX  23
H26A  2    0.763564    0.761825    0.344821    11.00000   -1.20000
H26B  2    0.747763    0.957916    0.352116    11.00000   -1.20000
AFIX   0
O27   5    0.672782    0.810640    0.383756    11.00000    0.03187    0.04268 =
         0.05375    0.01296   -0.00595    0.00189
C28   1    0.709416    0.797683    0.456989    11.00000    0.05424    0.03330 =
         0.06133   -0.00831   -0.02353    0.00126
AFIX  23
H28A  2    0.720495    0.911200    0.477313    11.00000   -1.20000
H28B  2    0.757941    0.737260    0.461558    11.00000   -1.20000
AFIX   0
C29   1    0.661341    0.708244    0.496148    11.00000    0.06521    0.05252 =
         0.03100   -0.01264   -0.01247    0.01134
AFIX  23
H29A  2    0.682612    0.716837    0.547899    11.00000   -1.20000
H29B  2    0.610033    0.757812    0.485876    11.00000   -1.20000
AFIX   0
O30   5    0.657591    0.534735    0.474359    11.00000    0.03642    0.05221 =
         0.02714   -0.00179    0.00100    0.00186
C31   1    0.614274    0.439520    0.511322    11.00000    0.03718    0.08344 =
         0.03526    0.01563   -0.00051   -0.00376
AFIX  23
H31A  2    0.566316    0.498772    0.511425    11.00000   -1.20000
H31B  2    0.642030    0.425906    0.561278    11.00000   -1.20000
AFIX   0
C32   1    0.597067    0.268095    0.477306    11.00000    0.03216    0.05450 =
         0.05139    0.02603   -0.00493   -0.01082
AFIX  23
H32A  2    0.645113    0.216108    0.472003    11.00000   -1.20000
H32B  2    0.575438    0.196415    0.509775    11.00000   -1.20000
AFIX   0
O33   5    0.546213    0.270460    0.409745    11.00000    0.01968    0.04791 =
         0.04749    0.02192   -0.00653   -0.00450
C34   1    0.577793    0.263754    0.348764    11.00000    0.02464    0.02891 =
         0.04757    0.00620   -0.01064    0.00074
AFIX  23
H34A  2    0.546290    0.188573    0.313412    11.00000   -1.20000
H34B  2    0.628779    0.213166    0.362477    11.00000   -1.20000
AFIX   0
C35   1    0.584574    0.432245    0.313344    11.00000    0.01712    0.02733 =
         0.03332   -0.00045   -0.00694   -0.00231
AFIX  23
H35A  2    0.600604    0.517843    0.350782    11.00000   -1.20000
H35B  2    0.624609    0.424035    0.285854    11.00000   -1.20000
AFIX   0
HKLF 4

REM
REM R1 =  0.0265 for    5017 Fo > 4sig(Fo)  and  0.0284 for all    5320 data
REM    321 parameters refined using      0 restraints

END

WGHT      0.0237      8.4570

REM Highest difference peak  2.071,  deepest hole -1.046,  1-sigma level  0.113
Q1    1   0.5741  0.7847  0.2525  11.00000  0.05    2.07
Q2    1   0.5925  0.5774  0.4745  11.00000  0.05    1.39
Q3    1   0.6385  0.7846  0.2531  11.00000  0.05    1.13
Q4    1   0.6401  0.4246  0.4777  11.00000  0.05    0.69
Q5    1   0.6186  0.7353  0.5061  11.00000  0.05    0.68
;
_shelx_res_checksum               56827
_shelx_hkl_file
;
   1   0   0    0.33    0.14
   1   0   0   -0.10    0.12
  -1   0   0    0.14    0.14
   1   0   0   -0.04    0.19
  -1   0   0    0.09    0.21
   2   0   0  321.48   12.22
   2   0   0  290.47   12.66
  -2   0   0  260.99   12.17
  -2   0   0  295.00   12.73
   3   0   0    0.39    0.19
  -3   0   0    0.40    0.14
  -3   0   0    0.11    0.37
  -3   0   0    0.21    0.26
   3   0   0    0.29    0.39
   3   0   0    0.59    0.28
  -3   0   0    0.22    0.22
   3   0   0    0.24    0.25
   4   0   0   15.19    0.90
   4   0   0   15.64    1.25
  -4   0   0   15.64    0.87
  -4   0   0   17.94    1.99
  -4   0   0   16.61    1.31
  -4   0   0   15.85    1.07
   4   0   0   18.32    1.85
   4   0   0   16.59    1.29
   5   0   0    0.25    0.22
  -5   0   0   -0.09    0.20
   5   0   0    0.15    0.35
   5   0   0    0.62    0.19
  -5   0   0    0.03    0.25
  -5   0   0   -0.25    0.32
   5   0   0    0.80    0.48
  -5   0   0    0.29    0.33
  -5   0   0    0.52    0.74
   5   0   0    0.42    0.61
  -6   0   0   20.32    1.45
   6   0   0   22.30    2.50
   6   0   0   19.88    1.12
  -6   0   0   21.52    1.21
   6   0   0   16.20    1.64
   6   0   0   17.89    1.66
  -6   0   0   18.71    1.31
  -6   0   0   25.69    1.98
   6   0   0   20.82    1.06
  -6   0   0   21.82    2.76
   7   0   0   -0.22    0.20
   7   0   0   -0.10    0.66
   7   0   0   -0.26    0.26
   7   0   0    0.25    0.19
  -7   0   0    0.25    0.32
  -7   0   0    1.26    1.22
  -7   0   0    0.39    0.45
   7   0   0    0.42    0.62
  -8   0   0   34.05    1.97
   8   0   0   32.27    1.50
   8   0   0   31.54    1.74
   8   0   0   32.75    1.49
  -8   0   0   40.04    2.35
   8   0   0   37.89    2.84
   9   0   0    0.13    0.51
  -9   0   0    0.51    0.41
   9   0   0    0.65    0.34
  -9   0   0    0.50    0.52
 -10   0   0   82.82    4.17
 -10   0   0   80.91    4.51
  10   0   0   87.67    5.44
  10   0   0   75.23    3.79
 -11   0   0    0.37    0.43
  11   0   0    0.20    0.71
  11   0   0   -0.04    0.31
 -11   0   0   -0.29    0.40
  12   0   0  177.28   10.07
  12   0   0  176.05    8.39
  12   0   0  185.32    8.01
 -12   0   0  181.86    9.00
 -12   0   0  180.43    8.55
  13   0   0   -0.31    0.53
 -13   0   0   -0.03    0.56
 -13   0   0    0.83    0.72
  13   0   0    0.24    0.46
  13   0   0   -0.20    0.32
  14   0   0  313.00   12.81
  14   0   0  289.03   12.66
  14   0   0  321.60   12.95
 -14   0   0  251.40   13.75
  14   0   0  288.01   12.61
  14   0   0  302.59   12.87
  15   0   0    0.01    0.48
 -15   0   0   -0.37    0.85
  15   0   0    0.23    0.48
  15   0   0   -0.40    0.39
  15   0   0    0.14    0.50
  15   0   0    1.21    0.80
  15   0   0    0.02    0.43
  15   0   0    0.28    0.65
  16   0   0  121.72    5.87
  16   0   0  114.94    5.89
  16   0   0  120.05    5.59
  16   0   0  117.27    5.54
  16   0   0  124.86    5.62
  16   0   0  120.36    5.79
  17   0   0    0.28    0.57
  17   0   0   -0.53    0.44
  17   0   0   -0.22    0.45
 -17   0   0   -0.94    0.76
  17   0   0    0.27    0.42
  17   0   0   -0.82    0.40
  17   0   0   -0.57    0.88
  17   0   0   -0.57    0.56
 -18   0   0   31.78    2.27
  18   0   0   31.09    2.31
  18   0   0   31.40    1.77
 -18   0   0   33.01    2.25
  18   0   0   30.92    2.15
  18   0   0   32.55    1.79
  19   0   0    1.00    0.56
 -19   0   0    0.82    0.62
  19   0   0   -0.23    0.57
 -19   0   0    0.79    0.66
 -20   0   0    8.52    0.97
  20   0   0    8.23    1.01
 -20   0   0    7.48    0.95
  20   0   0    7.82    0.90
  21   0   0    0.35    0.39
  21   0   0    1.06    0.43
 -21   0   0    0.33    0.38
 -21   0   0    0.16    0.42
 -21   0   0   -0.26    0.47
   0  -1   0    0.29    0.30
   0  -1   0   -0.24    0.34
   0  -1   0    0.65    0.69
   0   1   0   -0.15    0.38
   0   1   0    0.18    0.14
   0   1   0    0.01    0.50
  -1  -1   0  283.95   13.09
   1  -1   0  311.02   12.78
   1  -1   0  239.45   11.74
  -1  -1   0  300.82   11.47
   1  -1   0  244.09   12.02
  -1  -1   0  262.65   11.85
  -1  -1   0  274.70   12.65
   1   1   0  292.53   13.11
   1   1   0  291.69   11.52
  -1   1   0  268.69   11.90
  -1   1   0  290.66   13.65
   1   1   0  270.30   12.70
  -1   1   0  288.43   12.55
   2  -1   0  313.48   14.73
  -2  -1   0  364.21   14.20
   2  -1   0  335.94   14.58
  -2  -1   0  348.08   14.70
  -2  -1   0  340.32   16.01
  -2  -1   0  355.63   15.73
   2  -1   0  357.10   14.68
   2  -1   0  336.65   14.83
   2   1   0  355.45   16.13
  -2   1   0  337.22   15.51
   2   1   0  354.79   15.78
  -2   1   0  333.03   15.57
   2   1   0  342.85   14.21
   3  -1   0  134.11    7.14
  -3  -1   0  163.32    6.71
  -3  -1   0  161.96    8.85
   3  -1   0  159.53    6.99
  -3  -1   0  157.76    8.40
   3  -1   0  157.00    7.32
  -3  -1   0  157.94    6.87
  -3  -1   0  170.93    7.37
   3  -1   0  145.94    6.59
   3   1   0  173.74    8.60
  -3   1   0  170.62    8.09
  -3   1   0  144.67    6.53
   3   1   0  156.37    6.67
   4  -1   0    3.73    0.75
  -4  -1   0    4.02    1.25
   4  -1   0    5.03    0.86
   4  -1   0    4.38    0.59
   4  -1   0    3.47    0.38
  -4  -1   0    4.42    0.79
  -4  -1   0    4.94    1.66
  -4  -1   0    4.73    0.56
  -4  -1   0    3.87    0.66
   4   1   0    4.97    1.32
  -4   1   0    3.68    0.43
  -4   1   0    3.91    1.07
   5  -1   0    6.49    1.26
  -5  -1   0    5.71    0.78
  -5  -1   0    6.56    1.80
  -5  -1   0    7.28    1.70
   5  -1   0    7.20    0.84
   5  -1   0    6.92    1.03
  -5  -1   0    6.71    0.68
   5  -1   0    6.26    0.52
  -5  -1   0    6.13    0.98
   5  -1   0    7.16    1.04
   5   1   0    7.60    1.04
  -5   1   0    6.72    1.47
   5   1   0    7.06    1.66
  -5   1   0    7.34    0.70
  -6  -1   0  321.38   16.17
  -6  -1   0  286.59   13.65
  -6  -1   0  323.28   13.05
   6  -1   0  262.63   13.01
  -6  -1   0  304.13   12.72
   6  -1   0  334.89   13.88
   6  -1   0  277.34   12.46
   6  -1   0  309.49   14.20
  -6   1   0  302.18   12.31
  -6   1   0  294.13   15.25
   6   1   0  335.86   16.04
   6   1   0  295.36   12.59
   6   1   0  255.79   13.49
  -6   1   0  297.40   12.83
  -7  -1   0    7.42    0.93
   7  -1   0    7.85    1.26
   7  -1   0    7.05    1.16
  -7  -1   0    7.53    0.83
   7  -1   0    7.07    0.62
  -7  -1   0    9.14    2.26
   7  -1   0    6.65    1.45
   7   1   0    7.28    0.67
  -7   1   0    7.48    0.94
   7   1   0    6.53    1.19
  -7   1   0    8.14    0.62
   7   1   0    6.85    0.65
   8  -1   0  255.13   10.92
   8  -1   0  286.34   12.59
  -8  -1   0  266.64   11.73
  -8  -1   0  255.79   11.34
   8  -1   0  268.65   12.41
   8   1   0  278.29   11.10
  -8   1   0  257.15   11.59
  -8   1   0  249.21   11.04
   8   1   0  262.64   11.03
   8   1   0  233.38   12.41
  -9  -1   0    5.10    1.05
   9  -1   0    3.39    0.55
  -9  -1   0    4.74    0.90
   9  -1   0    3.65    1.12
   9   1   0    2.78    0.48
   9   1   0    4.65    0.66
  -9   1   0    3.44    0.85
   9   1   0    3.63    1.22
  -9   1   0    4.90    0.76
 -10  -1   0  233.89   10.61
 -10  -1   0  249.34   11.15
  10  -1   0  234.52   10.13
  10  -1   0  224.12   11.79
  10   1   0  232.45   10.16
  10   1   0  247.42   12.35
 -10   1   0  230.39   10.38
  10   1   0  243.96   10.03
 -10   1   0  237.58   10.94
 -11  -1   0   32.71    2.31
 -11  -1   0   30.79    2.60
  11  -1   0   33.26    3.13
  11  -1   0   30.96    1.84
  11   1   0   31.61    1.88
 -11   1   0   33.75    2.54
  11   1   0   30.40    3.26
 -11   1   0   30.19    2.12
  12  -1   0   55.10    3.00
 -12  -1   0   62.04    4.08
 -12  -1   0   57.67    3.57
  12  -1   0   55.09    3.03
 -12   1   0   59.32    3.46
  12   1   0   56.87    3.05
 -12   1   0   59.95    3.85
  12   1   0   61.39    4.97
  13  -1   0   71.93    3.56
  13  -1   0   65.42    3.51
 -13  -1   0   70.74    4.71
  13  -1   0   71.15    3.42
 -13  -1   0   64.20    4.13
  13   1   0   67.14    3.68
  13   1   0   70.06    3.70
 -13   1   0   80.48    4.61
  13   1   0   68.04    3.57
 -13   1   0   65.65    4.01
  14  -1   0    3.41    0.67
  14  -1   0    2.84    0.64
  14  -1   0    3.38    0.80
 -14  -1   0    2.50    1.22
  14  -1   0    3.28    0.75
  14  -1   0    3.19    0.73
 -14  -1   0    2.82    1.06
  14   1   0    4.54    0.88
 -14   1   0    2.30    0.96
  14   1   0    2.86    0.84
  14   1   0    5.01    1.09
  14   1   0    4.19    0.97
  14   1   0    3.12    0.79
  14   1   0    3.33    0.84
  15  -1   0   11.55    1.08
  15  -1   0   11.41    1.16
  15  -1   0    9.85    1.00
  15  -1   0   10.36    2.01
  15  -1   0   11.37    1.30
  15  -1   0    9.96    1.00
 -15  -1   0   11.65    1.57
  15  -1   0   11.71    1.91
  15   1   0   13.34    1.41
  15   1   0   11.42    1.42
  15   1   0   10.86    1.39
 -15   1   0   14.07    1.95
  15   1   0   12.11    1.40
  15   1   0   11.97    1.47
  15   1   0   12.83    1.52
  15   1   0   11.15    1.23
  15   1   0   10.98    1.62
 -16  -1   0   23.45    2.08
  16  -1   0   20.60    1.64
 -16  -1   0   20.35    1.96
  16  -1   0   21.41    1.30
  16  -1   0   24.12    1.73
  16  -1   0   21.35    1.42
  16  -1   0   21.95    1.98
  16  -1   0   20.78    1.39
  16   1   0   22.08    1.62
  16   1   0   19.84    2.03
  16   1   0   23.07    1.85
  16   1   0   24.42    1.78
  16   1   0   20.22    1.72
  16   1   0   24.21    1.81
  16   1   0   22.70    1.86
  17  -1   0   28.85    1.51
  17  -1   0   27.21    1.54
  17  -1   0   31.51    2.16
 -17  -1   0   27.97    2.14
 -17  -1   0   28.63    2.20
  17  -1   0   31.17    2.02
  17  -1   0   27.95    1.96
  17   1   0   30.97    1.99
  17   1   0   29.11    1.61
  17   1   0   26.11    2.20
  17   1   0   27.36    2.01
  17   1   0   27.07    2.09
  17   1   0   28.09    2.10
  17   1   0   28.53    1.99
  18  -1   0   27.77    2.05
  18  -1   0   31.16    2.22
 -18  -1   0   31.47    2.08
  18  -1   0   28.78    1.94
  18  -1   0   25.88    1.96
 -18  -1   0   30.24    2.09
  18   1   0   29.82    2.14
  18   1   0   29.93    1.88
  18   1   0   28.75    2.04
  18   1   0   27.96    1.84
 -18   1   0   29.15    2.17
  18   1   0   28.96    1.84
  19  -1   0    3.69    0.85
  19  -1   0    3.36    0.74
 -19  -1   0    3.36    0.75
 -19  -1   0    3.51    0.76
 -19   1   0    3.32    0.81
  19   1   0    3.76    0.58
  19   1   0    3.87    0.59
  19   1   0    3.02    0.74
  19   1   0    2.72    0.78
  20  -1   0   42.98    2.37
 -20  -1   0   42.56    2.71
 -20  -1   0   40.74    2.36
 -20  -1   0   41.74    2.37
  20  -1   0   44.54    2.49
  20   1   0   45.11    2.43
 -20   1   0   42.79    2.46
 -20   1   0   49.75    2.50
  20   1   0   43.04    2.36
 -21  -1   0    0.50    0.50
 -21  -1   0   -0.25    0.32
  21  -1   0    1.00    0.37
  21  -1   0    0.51    0.38
 -21  -1   0    0.05    0.37
 -21   1   0    0.54    0.41
 -21   1   0    0.00    0.36
  21   1   0    0.67    0.38
   0  -2   0  241.29   12.53
   0  -2   0  239.88   13.19
   0  -2   0  270.19   11.77
   0  -2   0  313.23   12.56
   0  -2   0  298.99   15.17
   0   2   0  301.63   11.79
   0   2   0  264.06   11.79
   0   2   0  317.27   15.15
   0   2   0  300.77   14.18
   1  -2   0   11.71    1.12
   1  -2   0   10.58    1.99
   1  -2   0    6.77    1.22
   1  -2   0    8.44    0.68
  -1  -2   0    9.35    0.68
  -1  -2   0    7.43    1.43
  -1  -2   0   11.98    1.20
   1  -2   0    9.46    1.26
  -1  -2   0   10.45    2.07
  -1   2   0   10.60    0.70
  -1   2   0    9.44    1.67
   1   2   0    9.83    0.74
   1   2   0    9.90    1.99
  -1   2   0    8.89    0.55
   1   2   0    9.03    0.75
  -1   2   0   11.20    2.27
   1   2   0   10.59    1.81
   2  -2   0  144.38    7.95
   2  -2   0  159.83    7.07
  -2  -2   0  153.84    9.49
  -2  -2   0  163.53    7.35
   2  -2   0  132.91    6.46
  -2  -2   0  135.40    8.37
   2  -2   0  156.17    7.73
  -2  -2   0  144.41    6.47
  -2   2   0  151.30    9.83
   2   2   0  157.78    8.97
  -2   2   0  151.81    8.77
   2   2   0  147.97    6.58
   2   2   0  161.79    9.54
  -2   2   0  149.52    6.38
   2   2   0  149.09    6.57
   3  -2   0  236.57   11.70
  -3  -2   0  240.66   10.87
  -3  -2   0  252.09   11.82
   3  -2   0  243.96   11.66
  -3  -2   0  268.79   10.87
   3  -2   0  238.58   11.35
   3  -2   0  252.63   10.95
  -3  -2   0  270.52   13.61
  -3  -2   0  273.63   14.53
   3  -2   0  227.75   11.50
  -3   2   0  281.48   14.93
   3   2   0  247.60   11.01
   3   2   0  270.46   11.00
   3   2   0  264.39   13.80
  -3   2   0  278.29   10.78
   3   2   0  292.45   14.77
  -4  -2   0   71.35    3.28
   4  -2   0   63.87    3.51
  -4  -2   0   65.24    3.59
   4  -2   0   68.09    3.18
  -4  -2   0   74.28    5.75
  -4  -2   0   73.91    4.30
   4  -2   0   67.82    3.72
  -4  -2   0   71.06    6.21
   4  -2   0   70.76    3.82
  -4  -2   0   66.25    3.25
  -4   2   0   62.10    3.11
   4   2   0   71.67    5.78
   4   2   0   73.03    3.44
   4   2   0   68.27    3.30
  -4   2   0   72.34    5.88
  -5  -2   0  169.94   10.63
  -5  -2   0  150.93    7.39
  -5  -2   0  152.52   10.74
   5  -2   0  175.70    7.80
  -5  -2   0  168.46    7.06
   5  -2   0  152.03    7.40
   5  -2   0  151.91    6.81
  -5  -2   0  152.61    7.00
  -5  -2   0  147.73    8.06
   5   2   0  153.05    7.00
   5   2   0  165.99   10.39
   5   2   0  163.23    7.00
   5   2   0  155.47    7.18
  -5   2   0  178.02   10.41
  -5   2   0  156.09    6.93
   6  -2   0    3.33    0.76
  -6  -2   0    3.86    0.90
   6  -2   0    3.68    0.94
  -6  -2   0    3.92    0.69
   6  -2   0    3.14    0.46
  -6  -2   0    4.19    1.21
  -6  -2   0    4.16    1.93
   6   2   0    3.50    0.49
  -6   2   0    4.45    0.61
   6   2   0    3.50    0.61
   6   2   0    5.79    1.32
   7  -2   0  250.42   10.79
  -7  -2   0  267.27   15.88
   7  -2   0  237.98   10.60
   7  -2   0  267.56   11.99
  -7  -2   0  268.25   11.21
  -7   2   0  240.06   11.23
   7   2   0  270.59   11.11
   7   2   0  273.96   12.89
   7   2   0  243.72   10.85
  -8  -2   0   45.48    2.60
   8  -2   0   42.69    2.17
   8  -2   0   43.30    3.13
   8  -2   0   42.35    2.07
   8   2   0   47.20    2.47
   8   2   0   43.24    2.27
   8   2   0   40.43    3.60
  -8   2   0   46.58    2.81
  -9  -2   0  130.63    6.24
   9  -2   0  131.21    5.66
   9  -2   0  126.50    6.87
  -9   2   0  127.23    6.48
   9   2   0  139.62    6.01
   9   2   0  128.48    5.83
   9   2   0  119.18    7.65
  10  -2   0   26.54    1.54
  10  -2   0   22.70    2.28
 -10  -2   0   25.36    1.97
  10   2   0   24.94    3.00
  10   2   0   26.66    1.70
 -10   2   0   27.04    2.22
  10   2   0   25.32    1.62
  11  -2   0   43.79    2.43
  11  -2   0   43.94    3.28
 -11  -2   0   44.00    2.94
  11  -2   0   40.77    2.60
  11   2   0   46.71    2.53
  11   2   0   44.30    2.45
  11   2   0   45.15    4.36
 -11   2   0   46.11    3.18
  11   2   0   48.14    2.73
  12  -2   0  136.06    6.42
  12  -2   0  148.44    6.42
  12  -2   0  141.20    6.41
  12  -2   0  127.61    7.20
 -12  -2   0  147.28    7.16
  12   2   0  145.80    9.36
  12   2   0  141.98    6.51
  12   2   0  148.39    6.29
  12   2   0  138.36    6.19
 -12   2   0  130.07    7.24
  13  -2   0   10.08    1.16
  13  -2   0    9.33    1.13
  13  -2   0    9.58    0.91
 -13  -2   0   11.51    1.43
  13  -2   0   10.96    0.90
  13   2   0   11.37    1.57
  13   2   0    9.46    1.24
 -13   2   0   12.67    1.58
  13   2   0    9.40    0.86
  14  -2   0   87.60    3.84
 -14  -2   0   82.67    4.40
  14  -2   0   87.86    4.25
  14  -2   0   84.23    4.23
  14  -2   0   83.69    3.83
  14  -2   0   83.28    5.16
 -14  -2   0   89.57    4.42
  14   2   0   87.63    4.54
  14   2   0   85.24    4.49
 -14   2   0   78.86    5.13
  14   2   0   82.84    4.51
  14   2   0   86.67    4.69
  14   2   0   83.06    4.40
  14   2   0   84.13    4.40
  14   2   0   82.76    4.47
  15  -2   0    0.34    1.05
  15  -2   0    0.65    0.31
 -15  -2   0    0.91    0.69
  15  -2   0    0.62    0.35
  15  -2   0    0.76    0.47
 -15  -2   0   -0.05    0.69
  15  -2   0    1.83    0.59
  15   2   0    1.63    0.73
  15   2   0    1.25    0.79
  15   2   0    1.36    0.86
  15   2   0    1.91    0.79
  15   2   0    0.24    0.84
 -15   2   0    0.87    0.92
  15   2   0    2.53    0.82
  16  -2   0   22.87    2.33
  16  -2   0   30.91    2.06
 -16  -2   0   30.12    2.20
  16  -2   0   32.82    2.05
  16  -2   0   29.93    2.72
 -16  -2   0   29.80    2.17
  16   2   0   34.14    2.43
  16   2   0   31.01    2.25
  16   2   0   33.37    2.21
  16   2   0   30.10    2.15
  16   2   0   33.59    2.35
  16   2   0   35.50    2.32
  17  -2   0   36.86    2.46
  17  -2   0   45.04    3.28
  17  -2   0   43.94    2.71
 -17  -2   0   41.14    2.66
  17  -2   0   46.83    2.54
 -17  -2   0   43.61    2.64
  17   2   0   44.66    2.78
  17   2   0   41.94    2.64
  17   2   0   44.26    2.48
  17   2   0   43.40    2.73
  17   2   0   40.00    2.59
  17   2   0   41.45    2.64
 -18  -2   0   10.40    1.24
  18  -2   0   11.31    1.04
 -18  -2   0    6.69    1.27
 -18  -2   0   10.59    1.22
  18  -2   0   11.39    1.27
  18   2   0    8.22    1.05
  18   2   0   11.91    1.33
  18   2   0   12.08    1.24
 -18   2   0    5.10    1.38
  18   2   0    8.88    1.18
  18   2   0   13.50    1.32
  18   2   0    9.23    0.78
  19  -2   0   66.37    3.38
 -19  -2   0   67.20    3.32
  19  -2   0   66.86    3.46
 -19  -2   0   68.94    3.35
 -19  -2   0   65.60    3.77
  19  -2   0   62.36    3.27
  19   2   0   67.66    3.39
  19   2   0   62.65    3.22
  19   2   0   67.07    3.31
  19   2   0   61.59    3.27
  19   2   0   63.64    3.30
 -19   2   0   65.50    3.42
  20  -2   0    4.63    0.65
 -20  -2   0    4.77    0.64
 -20  -2   0    4.97    0.88
  20  -2   0    4.30    0.73
 -20  -2   0    4.59    0.68
  20   2   0    4.68    0.55
 -20   2   0    5.48    0.79
  20   2   0    4.60    0.66
  21  -2   0   32.42    1.75
 -21  -2   0   31.92    1.66
  21  -2   0   33.61    1.79
 -21   2   0   34.90    1.79
   0  -3   0    0.90    1.37
   0  -3   0    0.01    0.56
   0  -3   0    0.27    0.48
   0  -3   0    0.00    0.31
   0   3   0    0.17    1.11
   0   3   0    0.28    0.32
   0   3   0   -0.13    0.27
  -1  -3   0  223.70   10.80
   1  -3   0  252.97   13.56
   1  -3   0  215.39    9.81
  -1  -3   0  249.40   14.84
  -1  -3   0  212.15    9.79
   1  -3   0  223.26   10.62
  -1  -3   0  215.06   12.23
  -1   3   0  203.09   13.81
  -1   3   0  214.68    9.80
  -1   3   0  224.43    9.77
   1   3   0  256.39   14.66
   1   3   0  246.28    9.98
   1   3   0  215.31    9.81
   1   3   0  252.74   10.03
  -2  -3   0   81.33    6.43
  -2  -3   0   87.79    4.24
   2  -3   0   77.85    5.29
   2  -3   0   87.31    4.84
   2  -3   0   85.78    4.22
   2  -3   0  106.09    6.61
  -2  -3   0   98.75    5.36
  -2   3   0  104.33    8.31
   2   3   0   88.89    4.26
   2   3   0   94.74    8.02
  -2   3   0   91.45    4.06
   2   3   0   91.80    4.39
  -2   3   0   90.69    4.21
   2   3   0   87.85    4.36
  -3  -3   0  204.65    8.86
   3  -3   0  195.09    9.44
   3  -3   0  182.21    9.96
  -3  -3   0  216.00   12.30
   3  -3   0  195.47    8.84
  -3  -3   0  227.27   10.33
   3   3   0  217.19    9.09
  -3   3   0  208.43    8.54
   3   3   0  202.47   13.58
   3   3   0  210.99    9.03
   3   3   0  194.15    8.86
  -3   3   0  187.45    8.74
   4  -3   0    0.68    0.45
   4  -3   0    0.95    0.41
   4  -3   0    0.57    0.33
  -4  -3   0    1.36    1.20
  -4  -3   0    0.31    0.61
  -4  -3   0    1.55    0.51
   4  -3   0    0.72    0.37
  -4  -3   0    0.85    0.34
   4   3   0    0.70    0.44
   4   3   0    0.83    0.45
   4   3   0    1.08    0.45
  -4   3   0    0.76    0.37
  -5  -3   0  130.05    7.29
   5  -3   0  131.40    5.56
  -5  -3   0  125.15    9.56
  -5  -3   0  121.41    5.74
  -5  -3   0  123.30    5.60
   5  -3   0  118.99    6.15
   5   3   0  123.19    5.79
  -5   3   0  116.30    5.63
   5   3   0  125.18    5.77
   6  -3   0    0.53    0.31
   6  -3   0    0.66    0.47
  -6  -3   0    1.69    0.53
  -6  -3   0    1.40    1.58
  -6  -3   0    0.51    0.78
  -6   3   0    0.43    0.38
   6   3   0    0.54    0.37
   6   3   0    1.57    0.54
  -7  -3   0    0.14    0.39
   7  -3   0    1.01    0.33
   7  -3   0    0.03    0.38
  -7   3   0    0.25    0.40
   7   3   0    0.65    0.94
   7   3   0    0.00    0.35
   8  -3   0   15.28    0.97
   8  -3   0   17.33    1.08
   8  -3   0   15.78    1.51
  -8  -3   0   15.82    1.45
   8   3   0   19.05    2.74
  -8   3   0   17.12    1.57
   8   3   0   17.79    1.45
   9  -3   0   85.00    3.84
   9  -3   0   89.55    4.50
  -9  -3   0   82.50    4.43
   9  -3   0   83.70    3.86
   9   3   0   83.59    4.35
  -9   3   0   81.84    4.72
   9   3   0   82.83    6.37
  10  -3   0    5.56    0.73
 -10  -3   0    4.93    1.04
  10  -3   0    4.98    0.79
  10  -3   0    5.96    0.84
  10   3   0    6.11    1.01
 -10   3   0    5.38    1.24
  10   3   0    5.29    0.93
  11  -3   0  114.41    5.13
  11  -3   0  101.74    4.98
 -11  -3   0   99.43    5.60
 -11   3   0  109.18    6.04
  11   3   0  111.01    5.35
  11   3   0  112.22    5.20
  12  -3   0   10.77    1.03
  12  -3   0    9.22    0.68
  12  -3   0    8.61    1.04
 -12  -3   0    9.94    1.33
 -12  -3   0    9.27    1.70
 -12  -3   0   10.13    1.30
 -12   3   0    8.65    1.62
  12   3   0    8.69    1.05
  12   3   0    9.49    1.11
 -13  -3   0  114.50    6.27
 -13  -3   0  114.90    5.59
  13  -3   0  112.64    6.46
  13  -3   0  116.97    5.49
  13  -3   0  119.16    5.50
 -13  -3   0  115.99    5.56
  13  -3   0  111.95    4.85
  13   3   0  111.84    5.61
  13   3   0  114.85    7.44
  13   3   0  120.12    5.64
 -13   3   0  121.72    6.59
  13   3   0  119.17    5.41
  13   3   0  110.10    5.96
  13   3   0  118.99    5.66
 -14  -3   0    0.48    0.96
 -14  -3   0   -0.07    0.66
 -14  -3   0    1.15    0.70
  14  -3   0    0.33    0.88
  14  -3   0    0.39    0.46
  14  -3   0    0.30    0.36
  14   3   0   -0.24    0.87
  14   3   0    1.46    0.74
 -14   3   0    0.32    0.82
  14   3   0    1.23    0.94
  14   3   0    1.55    0.75
  14   3   0    0.92    0.94
  14   3   0    0.58    0.36
  14   3   0    0.21    1.00
 -15  -3   0  141.97    6.83
 -15  -3   0  149.71    6.84
  15  -3   0  148.72    6.77
 -15  -3   0  152.96    7.67
  15  -3   0  159.85    7.88
  15  -3   0  148.17    6.81
  15   3   0  135.27    7.16
  15   3   0  150.00    7.38
  15   3   0  149.61    7.19
  15   3   0  146.62    7.13
  15   3   0  145.35    6.94
  15   3   0  146.42    6.85
 -16  -3   0    2.98    0.77
  16  -3   0    3.33    1.17
  16  -3   0    2.74    0.61
  16  -3   0    3.02    0.70
 -16  -3   0    2.33    1.04
 -16  -3   0    2.64    0.81
  16   3   0    2.89    0.93
  16   3   0    2.61    0.92
  16   3   0    3.53    1.17
  16   3   0    3.42    1.06
  16   3   0    5.44    0.98
  16   3   0    3.21    0.87
 -17  -3   0  108.60    4.95
 -17  -3   0  104.18    4.90
 -17  -3   0  101.20    5.56
  17  -3   0  102.16    4.85
  17  -3   0  105.95    5.05
  17  -3   0  102.63    5.61
  17  -3   0   94.56    4.86
  17   3   0  101.70    5.30
  17   3   0  105.55    5.20
  17   3   0  107.78    5.29
  17   3   0   98.40    5.00
  17   3   0  100.41    4.94
 -18  -3   0    0.27    0.73
 -18  -3   0    0.12    0.50
 -18  -3   0    0.99    0.48
  18  -3   0    0.09    0.49
  18  -3   0    0.54    0.34
  18   3   0    0.22    0.69
  18   3   0    0.61    0.48
  18   3   0    0.38    0.51
  18   3   0    0.41    0.61
  18   3   0   -0.33    0.59
 -19  -3   0   17.44    1.22
 -19  -3   0   17.17    1.62
  19  -3   0   15.61    1.58
  19  -3   0   17.65    1.30
  19  -3   0   18.49    1.21
 -19   3   0   16.13    1.39
  19   3   0   17.89    1.39
  19   3   0   20.96    1.47
  19   3   0   20.51    1.49
  20  -3   0    0.00    0.42
  20  -3   0    1.05    0.34
 -20  -3   0    0.64    0.87
  20   3   0    0.20    0.38
 -20   3   0    1.22    0.46
   0  -4   0   50.71    2.79
   0  -4   0   50.88    3.64
   0   4   0   49.28    2.86
   0   4   0   49.84    2.94
  -1  -4   0    2.54    1.00
  -1  -4   0    2.26    1.36
   1  -4   0    3.34    1.00
  -1  -4   0    3.46    0.72
   1  -4   0    2.68    1.28
   1  -4   0    3.41    0.70
   1   4   0    3.34    0.77
  -1   4   0    2.63    0.65
  -1   4   0    2.82    0.71
   1   4   0    3.49    0.78
  -2  -4   0    0.51    0.39
  -2  -4   0    0.26    0.57
   2  -4   0    0.84    0.79
   2  -4   0    1.09    0.52
   2  -4   0    0.00    0.34
  -2  -4   0    0.31    1.01
   2   4   0    0.33    0.44
   2   4   0    0.44    0.46
  -2   4   0    0.13    0.36
  -2   4   0    0.71    0.43
  -3  -4   0  121.25    7.36
  -3  -4   0  108.64    9.12
   3  -4   0  129.20    6.62
   3  -4   0  126.66    5.91
  -3  -4   0  124.36    5.95
   3   4   0  123.93    6.16
  -3   4   0  131.94    5.97
  -3   4   0  128.04    5.85
   3   4   0  133.26    6.22
  -4  -4   0   36.90    5.20
  -4  -4   0   43.71    2.65
   4  -4   0   42.55    3.00
  -4  -4   0   44.77    3.93
   4  -4   0   49.27    2.61
   4   4   0   45.17    2.79
  -4   4   0   44.45    2.60
  -4   4   0   45.01    2.45
   4   4   0   46.57    2.90
   4   4   0   43.98    2.68
  -5  -4   0  302.44   15.32
  -5  -4   0  301.19   13.28
   5  -4   0  282.19   13.56
   5  -4   0  310.53   12.93
  -5   4   0  296.03   13.19
   5   4   0  313.99   13.38
   5   4   0  308.63   13.32
   6  -4   0    0.27    0.44
   6  -4   0    0.32    0.31
   6   4   0    0.50    0.47
  -6   4   0    0.04    0.42
   6   4   0    0.27    0.45
   7  -4   0  161.94    8.41
   7  -4   0  190.74    7.97
  -7   4   0  190.82    8.65
   7   4   0  196.25    8.65
   8  -4   0   10.13    0.97
   8  -4   0   10.54    0.82
   8  -4   0   11.33    0.86
  -8   4   0   11.06    1.37
   8   4   0   11.63    1.33
   9  -4   0  166.91    7.45
   9  -4   0  164.26    7.62
  -9  -4   0  169.84    9.16
   9  -4   0  173.90    7.38
   9   4   0  175.23    7.98
   9   4   0  171.90    8.21
  -9   4   0  179.83    8.52
  10  -4   0    0.08    0.32
  10  -4   0    0.94    0.44
 -10   4   0    0.33    0.55
  10   4   0   -0.22    0.51
  10   4   0   -0.20    0.54
 -11  -4   0   81.18    4.02
  11  -4   0   80.71    4.04
  11  -4   0   80.98    3.96
 -11  -4   0   83.41    4.03
  11   4   0   81.93    4.54
  11   4   0   81.79    4.26
  11   4   0   86.18    4.76
 -11   4   0   79.14    4.92
  12  -4   0    1.47    0.95
  12  -4   0    0.33    0.41
 -12  -4   0    1.16    0.61
  12  -4   0    1.38    0.52
 -12  -4   0    0.22    1.12
 -12  -4   0    0.05    0.62
  12   4   0    0.65    0.68
  12   4   0    0.15    0.65
 -12   4   0    0.28    0.71
  12   4   0    1.46    0.58
  13  -4   0   11.67    1.10
 -13  -4   0   12.46    1.97
 -13  -4   0   11.98    1.26
 -13  -4   0   11.25    1.24
  13  -4   0    9.71    1.73
  13  -4   0   13.13    1.18
  13   4   0   12.32    1.85
  13   4   0   13.28    1.23
  13   4   0   10.35    1.22
  13   4   0   12.43    1.46
 -14  -4   0    3.14    0.74
 -14  -4   0    1.97    0.67
  14  -4   0    3.67    0.75
 -14  -4   0    4.03    1.35
  14  -4   0    3.38    1.12
  14  -4   0    2.07    0.53
  14   4   0    2.26    1.09
  14   4   0    3.17    0.78
  14   4   0    2.44    0.66
  14   4   0    3.33    0.63
  15  -4   0    3.50    1.12
 -15  -4   0    2.24    1.06
  15  -4   0    3.26    0.68
  15  -4   0    3.24    0.62
 -15  -4   0    3.33    0.74
  15   4   0    3.77    1.22
  15   4   0    4.04    1.31
  15   4   0    2.06    0.70
  15   4   0    2.56    1.09
 -16  -4   0    9.74    1.02
  16  -4   0    9.17    1.05
 -16  -4   0   11.69    2.13
  16  -4   0    9.65    0.90
  16  -4   0   10.40    1.56
 -16  -4   0   10.36    1.65
  16   4   0   10.64    1.66
  16   4   0   10.59    1.38
  16   4   0   10.24    1.60
  16   4   0    9.54    1.50
  17  -4   0   43.58    2.29
 -17  -4   0   45.39    2.98
  17  -4   0   41.08    2.45
 -17  -4   0   43.21    2.19
 -17  -4   0   46.73    3.60
  17  -4   0   42.52    2.87
  17   4   0   45.66    3.02
  17   4   0   40.85    2.77
  17   4   0   39.98    2.84
  17   4   0   44.27    2.66
 -18  -4   0   14.86    1.62
  18  -4   0   15.48    1.19
  18  -4   0   13.18    0.99
  18  -4   0   13.51    1.46
 -18  -4   0   15.04    2.06
 -18  -4   0   16.17    1.85
  18   4   0   16.76    1.50
  18   4   0   16.90    1.55
  18   4   0   14.98    1.18
  18   4   0   12.37    1.46
 -19  -4   0   93.36    5.00
  19  -4   0   90.16    4.12
  19  -4   0   86.32    4.01
  19  -4   0   96.17    4.30
 -19   4   0   91.74    4.16
  19   4   0   86.75    4.37
  19   4   0   92.12    4.30
   0  -5   0   -0.42    0.57
   0  -5   0    0.57    0.47
   0   5   0    0.58    0.51
   0   5   0    0.49    0.51
  -1  -5   0  162.18    7.67
   1  -5   0  170.39    7.66
   1  -5   0  138.72    8.46
  -1  -5   0  156.13    9.01
  -1   5   0  162.06    7.90
   1   5   0  171.07    8.07
   1   5   0  167.67    7.94
  -1   5   0  166.82    7.83
  -2  -5   0   18.20    1.66
   2  -5   0   20.46    2.20
   2  -5   0   18.56    1.63
  -2  -5   0   20.81    2.66
  -2   5   0   18.06    1.76
   2   5   0   20.15    1.91
   2   5   0   20.27    1.94
  -2   5   0   20.64    1.78
  -3  -5   0  159.12    9.47
  -3  -5   0  152.48    7.68
   3  -5   0  170.31    8.44
   3  -5   0  159.72    7.52
   3   5   0  143.24    7.86
  -3   5   0  179.43    7.87
   3   5   0  153.39    7.96
  -3   5   0  164.69    7.76
   4  -5   0   55.32    3.14
   4  -5   0   50.67    3.63
  -4  -5   0   52.62    4.78
  -4  -5   0   59.19    3.48
  -4   5   0   60.18    3.43
   4   5   0   58.21    3.64
  -4   5   0   55.75    3.41
   5  -5   0   24.54    1.67
   5  -5   0   24.84    1.52
   5  -5   0   26.54    2.18
  -5  -5   0   24.01    3.28
  -5  -5   0   23.66    2.08
   5   5   0   21.73    2.07
  -5   5   0   23.11    2.01
  -6  -5   0  155.65    7.21
   6  -5   0  132.94    7.19
   6  -5   0  151.64    6.74
   6  -5   0  164.88    6.82
   6   5   0  145.94    7.46
  -6   5   0  158.58    7.56
  -7  -5   0    1.28    0.77
   7  -5   0    0.62    0.47
   7  -5   0    0.40    0.31
   7  -5   0    0.67    0.41
   7  -5   0    0.69    0.35
   7   5   0    2.96    0.99
  -7   5   0    0.41    0.58
   8  -5   0   95.49    3.88
  -8  -5   0   86.35    4.87
   8  -5   0   83.05    4.16
   8  -5   0   81.70    5.33
   8  -5   0   92.54    4.11
   8  -5   0   91.66    4.37
   8   5   0   89.99    5.11
  -8   5   0   91.18    5.15
   8   5   0   95.89    4.94
   9  -5   0   25.92    1.64
   9  -5   0   29.58    1.42
  -9  -5   0   26.49    2.28
  -9  -5   0   23.02    2.74
   9  -5   0   26.61    2.44
   9  -5   0   28.09    1.80
   9   5   0   27.04    2.14
   9   5   0   29.62    2.37
   9   5   0   30.15    2.70
  -9   5   0   26.00    2.43
 -10  -5   0   20.69    2.88
  10  -5   0   19.89    1.37
  10  -5   0   17.90    1.43
 -10  -5   0   20.90    2.66
 -10  -5   0   19.58    1.98
  10  -5   0   22.62    2.19
  10  -5   0   22.65    2.24
  10   5   0   19.31    1.79
  10   5   0   18.19    2.08
 -10   5   0   17.42    2.09
  10   5   0   20.60    2.19
 -11  -5   0   45.98    3.16
 -11  -5   0   41.96    3.63
  11  -5   0   44.64    3.27
  11  -5   0   42.36    2.45
  11  -5   0   38.21    3.23
  11  -5   0   43.25    2.40
 -11  -5   0   42.95    3.42
  11   5   0   45.30    2.81
  11   5   0   42.14    2.97
  11   5   0   45.93    3.23
 -11   5   0   41.81    3.32
  12  -5   0    3.80    0.72
 -12  -5   0    3.06    1.36
 -12  -5   0    5.45    1.23
 -12  -5   0    3.10    1.50
  12  -5   0    3.15    0.63
  12  -5   0    5.37    1.33
  12  -5   0    5.69    1.47
  12   5   0    2.72    0.95
  12   5   0    2.53    0.91
  12   5   0    4.30    0.87
 -13  -5   0   43.88    3.20
 -13  -5   0   44.73    3.75
  13  -5   0   49.04    3.36
 -13  -5   0   44.14    3.46
  13  -5   0   46.65    2.52
  13  -5   0   42.86    2.55
  13   5   0   46.89    3.01
  13   5   0   49.66    3.20
  13   5   0   45.56    2.70
 -14  -5   0    4.02    1.29
 -14  -5   0    3.40    0.99
  14  -5   0    5.52    0.83
  14  -5   0    4.62    0.70
  14  -5   0    4.56    1.21
 -14  -5   0    5.60    1.50
  14   5   0    4.55    0.81
  14   5   0    4.20    1.34
  14   5   0    3.62    0.62
  15  -5   0   80.94    3.78
 -15  -5   0   81.65    5.03
 -15  -5   0   78.58    4.61
  15  -5   0   83.38    4.52
 -15  -5   0   77.04    4.50
  15   5   0   74.08    4.42
  15   5   0   75.81    4.87
  16  -5   0    4.00    0.56
 -16  -5   0    4.48    1.20
 -16  -5   0    5.49    1.00
 -16  -5   0    5.04    1.07
  16  -5   0    5.18    0.99
  16  -5   0    4.19    0.72
  16   5   0    2.67    0.87
  16   5   0    4.28    1.27
  16   5   0    2.15    1.05
  17  -5   0   50.37    2.95
  17  -5   0   52.12    2.45
 -17  -5   0   50.65    3.33
  17  -5   0   55.84    2.65
  17   5   0   45.77    3.03
  17   5   0   48.94    3.12
  17   5   0   48.50    2.82
  18  -5   0   18.38    1.18
  18  -5   0   17.79    1.39
 -18  -5   0   17.82    1.64
  18   5   0   18.84    1.54
  18   5   0   19.07    1.17
   0  -6   0  134.95    5.98
   0  -6   0  133.64    6.54
   0  -6   0  121.97    6.23
   0   6   0  120.12    6.86
   0   6   0  127.24    6.84
  -1  -6   0    6.75    1.25
   1  -6   0    6.09    0.87
   1  -6   0    5.40    1.15
   1  -6   0    3.94    1.09
  -1  -6   0    6.92    1.02
  -1  -6   0    4.62    1.21
  -1   6   0    5.34    1.34
  -1   6   0    4.62    1.16
   1   6   0    3.26    1.18
   1   6   0    5.04    1.25
   2  -6   0  104.65    5.10
   2  -6   0  103.52    4.84
   2  -6   0  105.81    5.34
  -2  -6   0   95.28    5.29
  -2  -6   0  105.64    4.96
  -2  -6   0  104.27    5.51
  -2   6   0   90.06    5.53
  -2   6   0   92.63    5.65
   2   6   0  112.52    6.00
   2   6   0   96.25    5.85
   3  -6   0    0.46    0.41
  -3  -6   0    0.11    0.64
  -3  -6   0    1.46    1.04
   3  -6   0    1.00    0.79
   3  -6   0    3.83    0.93
   3  -6   0    0.17    0.59
  -3   6   0    0.42    0.73
  -3   6   0    0.37    0.68
   3   6   0    0.52    1.09
  -4  -6   0   84.64    4.89
   4  -6   0   76.42    4.02
  -4  -6   0   87.96    4.52
   4  -6   0   85.21    4.02
   4  -6   0   89.68    4.74
   4  -6   0   86.65    4.30
  -4  -6   0   80.31    4.76
  -4   6   0   88.52    5.03
  -4   6   0   60.56    5.48
   4   6   0   87.17    4.10
   4   6   0   79.06    4.43
  -5  -6   0   16.91    2.34
   5  -6   0   18.82    1.31
  -5  -6   0   19.56    1.72
  -5  -6   0   21.74    2.81
   5  -6   0   19.50    1.49
   5  -6   0   19.15    1.43
   5  -6   0   16.21    1.85
  -5  -6   0   20.92    2.55
   5   6   0   19.40    1.49
   5   6   0   17.56    1.85
  -5   6   0   18.97    2.02
  -6  -6   0   21.50    1.65
   6  -6   0   22.02    2.31
   6  -6   0   20.37    1.23
   6  -6   0   19.62    2.03
  -6  -6   0   23.15    2.00
   6  -6   0   20.73    1.44
  -6  -6   0   25.10    2.61
  -6  -6   0   21.50    2.45
   6  -6   0   21.26    1.54
   6   6   0   22.45    1.56
   6   6   0   20.88    1.90
  -6   6   0   19.83    2.15
  -7  -6   0   76.80    4.35
  -7  -6   0   70.88    4.70
   7  -6   0   72.70    3.73
  -7  -6   0   69.77    3.59
   7  -6   0   65.30    4.51
  -7  -6   0   70.60    4.67
   7  -6   0   72.61    3.58
   7  -6   0   76.97    3.42
   7  -6   0   74.79    4.41
  -7   6   0   75.02    4.59
   7   6   0   77.66    3.64
   7   6   0   66.85    4.15
   8  -6   0    4.38    0.77
   8  -6   0    4.92    0.76
  -8  -6   0    4.56    1.46
  -8  -6   0    4.44    0.79
   8  -6   0    4.44    1.25
   8  -6   0    4.31    1.32
  -8  -6   0    2.82    1.05
  -8   6   0    3.08    1.19
   8   6   0    6.30    1.17
   8   6   0    3.57    0.71
  -9  -6   0   20.97    2.21
   9  -6   0   20.11    1.55
   9  -6   0   21.55    2.16
  -9  -6   0   23.85    2.71
   9  -6   0   22.66    1.49
   9  -6   0   23.48    2.33
   9   6   0   21.61    2.39
   9   6   0   21.41    2.03
   9   6   0   19.20    1.93
 -10  -6   0   39.40    3.05
  10  -6   0   34.65    2.78
  10  -6   0   38.51    2.22
  10  -6   0   34.08    2.84
 -10  -6   0   35.55    3.11
  10  -6   0   39.70    2.19
  10   6   0   35.25    2.58
  10   6   0   35.10    2.94
  10   6   0   36.36    2.72
  11  -6   0    0.30    0.81
 -11  -6   0    0.48    0.85
  11  -6   0    0.15    0.78
 -11  -6   0    0.08    0.94
  11  -6   0    1.23    0.47
  11  -6   0    0.18    0.38
  11   6   0    1.39    0.79
  11   6   0    0.74    0.61
  11   6   0    0.34    0.71
 -12  -6   0   51.89    3.68
  12  -6   0   51.95    2.77
  12  -6   0   52.44    3.52
 -12  -6   0   54.03    3.65
  12  -6   0   55.58    3.55
  12  -6   0   51.77    2.81
  12   6   0   52.92    3.08
  12   6   0   53.32    3.42
  12   6   0   54.71    3.46
  13  -6   0    1.14    0.89
 -13  -6   0    2.14    0.92
 -13  -6   0    1.30    0.94
  13  -6   0    2.48    0.87
  13  -6   0    1.63    0.43
  13   6   0    1.76    0.65
  13   6   0    2.03    0.58
  13   6   0    1.53    0.79
  14  -6   0   74.06    4.08
  14  -6   0   71.63    3.41
 -14  -6   0   72.84    4.24
 -14  -6   0   68.61    4.21
  14  -6   0   73.95    3.73
  14   6   0   69.85    3.38
  14   6   0   72.85    3.45
  14   6   0   71.13    4.25
  14   6   0   76.95    4.09
  15  -6   0    0.18    0.43
  15  -6   0    0.63    0.52
 -15  -6   0   -0.15    0.67
 -15  -6   0    0.80    0.57
  15  -6   0    0.32    0.25
  15   6   0   -0.20    0.72
  16  -6   0   80.57    3.61
  16  -6   0   75.88    3.89
 -16  -6   0   74.17    3.85
  16   6   0   80.60    3.95
  16   6   0   73.44    4.19
  17  -6   0   14.67    0.92
  17  -6   0   13.13    1.09
  17   6   0   12.95    1.04
  17   6   0   13.68    1.39
   0  -7   0   -0.57    0.73
   0  -7   0    0.00    0.54
   0  -7   0    0.18    1.02
   0  -7   0    0.23    0.70
   0  -7   0   -0.48    0.70
   0  -7   0    1.01    0.58
   0  -7   0   -1.19    0.66
   0   7   0    0.33    1.04
   0   7   0    0.42    0.60
  -1  -7   0    0.12    0.80
   1  -7   0    0.37    0.64
   1  -7   0    0.19    0.65
   1  -7   0    0.72    0.51
  -1  -7   0    0.21    0.70
   1  -7   0    2.29    1.11
  -1  -7   0    1.09    0.85
  -1  -7   0    0.63    0.83
  -1  -7   0    0.96    0.56
  -1  -7   0    1.56    0.71
  -1  -7   0    0.04    0.91
   1  -7   0    0.50    0.73
  -1   7   0    0.27    0.63
  -1   7   0   -0.50    0.87
   1   7   0   -0.22    0.54
   1   7   0    1.37    0.79
  -2  -7   0   34.16    2.99
   2  -7   0   32.94    2.90
  -2  -7   0   30.94    2.34
  -2  -7   0   36.47    2.63
   2  -7   0   32.82    2.11
   2  -7   0   31.47    2.41
   2  -7   0   31.68    2.60
  -2  -7   0   32.47    2.20
  -2  -7   0   36.65    2.87
   2  -7   0   31.07    2.10
   2   7   0   31.29    2.43
  -2   7   0   33.10    3.06
   2   7   0   32.83    2.11
   3  -7   0    1.34    0.55
  -3  -7   0    1.85    0.89
   3  -7   0    0.95    0.58
   3  -7   0    1.01    0.80
   3  -7   0    2.03    1.04
  -3  -7   0    0.76    0.91
  -3  -7   0    0.24    1.04
  -3  -7   0   -0.23    1.03
   3  -7   0    1.11    0.54
  -3  -7   0    1.91    0.73
   3   7   0    0.20    0.72
   3   7   0    1.29    0.60
  -4  -7   0   72.58    4.50
  -4  -7   0   79.64    3.90
  -4  -7   0   77.56    4.47
  -4  -7   0   80.41    4.92
   4  -7   0   76.84    3.97
   4  -7   0   82.35    3.65
   4  -7   0   73.89    3.81
   4  -7   0   75.06    3.95
  -4  -7   0   70.34    4.87
   4  -7   0   77.77    4.55
   4  -7   0   83.69    4.82
   4   7   0   75.08    3.85
   4   7   0   83.60    4.48
   5  -7   0   -0.11    0.37
  -5  -7   0    0.11    1.01
  -5  -7   0    0.59    0.56
  -5  -7   0   -0.43    1.00
   5  -7   0    0.13    0.23
   5  -7   0    0.36    0.81
  -5  -7   0    0.66    1.08
   5  -7   0    0.56    0.41
   5  -7   0   -0.09    0.75
   5   7   0    0.73    0.67
   5   7   0    0.32    0.52
  -6  -7   0  125.91    7.03
   6  -7   0  120.48    5.82
  -6  -7   0  124.33    5.80
  -6  -7   0  127.00    6.68
  -6  -7   0  132.82    6.71
   6  -7   0  125.58    6.72
   6  -7   0  125.44    6.61
   6  -7   0  125.49    5.98
   6   7   0  130.21    6.43
   6   7   0  133.84    5.83
  -7  -7   0    3.41    1.29
   7  -7   0    2.03    0.87
  -7  -7   0    4.40    1.35
  -7  -7   0    2.34    1.11
   7  -7   0    2.81    0.65
   7  -7   0    3.58    1.16
  -7  -7   0    2.90    0.67
   7  -7   0    2.80    0.65
   7   7   0    3.09    0.96
   7   7   0    3.10    0.62
   8  -7   0   86.30    4.25
   8  -7   0   93.64    5.14
  -8  -7   0   82.94    5.10
   8  -7   0   90.99    4.36
   8  -7   0   94.29    5.06
   8   7   0   85.91    4.81
   8   7   0   84.55    5.38
   9  -7   0    1.03    0.40
   9  -7   0    0.50    0.62
   9  -7   0    0.52    0.37
  -9  -7   0    0.38    0.95
  -9  -7   0    0.42    1.06
   9  -7   0    0.95    0.71
   9   7   0    0.61    0.69
   9   7   0    0.11    0.79
   9   7   0    1.13    0.72
 -10  -7   0   31.72    2.83
  10  -7   0   32.82    1.94
  10  -7   0   33.77    2.59
  10  -7   0   31.70    2.55
 -10  -7   0   36.91    2.96
  10   7   0   35.00    2.39
  10   7   0   32.09    2.43
  10   7   0   33.70    2.70
 -11  -7   0    0.24    0.82
  11  -7   0    0.30    0.63
  11  -7   0    0.58    0.63
  11  -7   0    0.28    0.30
 -11  -7   0    0.24    0.99
  11   7   0    0.10    0.61
  11   7   0   -0.25    0.56
  11   7   0    0.32    0.51
  12  -7   0   16.25    1.57
 -12  -7   0   15.81    1.92
 -12  -7   0   18.58    1.88
  12  -7   0   17.70    1.28
  12  -7   0   15.86    1.59
  12  -7   0   16.92    1.13
  12   7   0   18.82    1.68
  12   7   0   14.60    1.47
  12   7   0   16.42    1.36
 -13  -7   0    1.50    1.00
 -13  -7   0    0.94    0.72
  13  -7   0    0.07    0.45
  13  -7   0    1.15    0.47
  13  -7   0    0.74    0.63
  13  -7   0    0.82    0.28
  13   7   0    1.19    0.43
  13   7   0    1.74    0.66
  13   7   0    0.96    0.37
  14  -7   0    2.22    0.49
  14  -7   0    2.44    0.60
 -14  -7   0    1.09    0.90
  14  -7   0    1.50    0.29
  14   7   0    2.60    0.87
  14   7   0    3.34    0.79
  15  -7   0    0.11    0.34
  15  -7   0    0.34    0.27
 -15  -7   0    0.71    0.74
  15   7   0    0.38    0.53
   0  -8   0   75.91    3.84
   0  -8   0   78.38    4.05
   0  -8   0   74.69    3.86
   0  -8   0   82.02    4.47
   0  -8   0   79.06    4.64
   0  -8   0   72.89    3.87
   0   8   0   74.98    3.85
  -1  -8   0    4.40    1.17
   1  -8   0    4.83    0.71
  -1  -8   0    4.97    1.01
   1  -8   0    4.83    1.09
   1  -8   0    2.66    0.75
   1  -8   0    3.50    1.03
   1  -8   0    6.01    0.96
  -1  -8   0    4.78    0.84
  -1  -8   0    4.82    1.17
   1  -8   0    2.12    0.72
  -1  -8   0    6.54    1.06
   1   8   0    5.39    0.83
  -1   8   0    6.03    0.92
  -2  -8   0   53.14    2.92
   2  -8   0   58.16    3.64
   2  -8   0   53.52    3.05
   2  -8   0   52.29    2.92
  -2  -8   0   56.69    3.24
   2  -8   0   49.22    3.38
   2  -8   0   49.80    2.97
  -2  -8   0   55.26    3.70
   2  -8   0   56.43    2.62
   2   8   0   54.76    3.31
   2   8   0   52.57    2.87
  -2   8   0   57.24    3.00
  -3  -8   0    9.30    1.56
   3  -8   0    6.96    1.12
  -3  -8   0   10.84    1.15
  -3  -8   0    6.82    1.26
   3  -8   0   12.22    1.17
  -3  -8   0    8.77    0.98
   3  -8   0    9.79    1.16
   3  -8   0   10.66    1.53
   3  -8   0    8.54    1.50
   3   8   0    9.91    1.07
   3   8   0    7.81    1.25
  -3   8   0   10.72    1.20
   4  -8   0   22.26    1.83
  -4  -8   0   25.36    2.34
   4  -8   0   22.03    1.63
  -4  -8   0   20.14    1.98
   4  -8   0   22.72    1.62
  -4  -8   0   22.12    1.58
   4  -8   0   21.52    2.07
  -4  -8   0   20.65    1.55
   4  -8   0   20.92    1.95
  -4   8   0   22.79    1.70
   4   8   0   21.30    1.50
   4   8   0   20.24    1.91
  -5  -8   0    6.02    1.38
   5  -8   0    4.27    1.02
   5  -8   0    5.19    0.81
  -5  -8   0    7.76    1.04
  -5  -8   0    4.36    0.74
  -5  -8   0    5.45    1.18
   5  -8   0    4.90    1.14
   5  -8   0    2.12    1.10
   5   8   0    5.38    0.74
   5   8   0    5.30    1.04
   6  -8   0    5.07    1.09
   6  -8   0    5.50    0.81
  -6  -8   0    8.00    1.17
  -6  -8   0    7.08    1.27
   6  -8   0    6.30    1.16
  -6  -8   0    6.89    0.79
  -6  -8   0    6.44    1.32
   6   8   0    6.37    0.74
   6   8   0    7.19    1.14
  -6   8   0    7.51    0.98
  -7  -8   0    4.39    1.09
   7  -8   0    3.81    0.92
   7  -8   0    5.26    0.77
   7  -8   0    3.74    0.89
  -7  -8   0    6.03    1.18
  -7  -8   0    5.89    1.05
   7   8   0    5.09    0.97
   7   8   0    6.88    1.54
  -7   8   0    3.57    0.93
  -8  -8   0    4.57    0.98
  -8  -8   0    6.32    1.23
   8  -8   0    6.32    1.10
  -8  -8   0    5.81    1.15
   8  -8   0    6.33    1.09
   8  -8   0    7.49    0.86
   8   8   0    6.49    1.17
   8   8   0    5.89    1.21
   8   8   0    6.29    1.09
   9  -8   0   13.45    1.01
   9  -8   0   13.90    1.46
  -9  -8   0   14.41    1.66
  -9  -8   0   10.61    1.47
  -9  -8   0   11.73    1.37
   9  -8   0   13.29    1.44
   9   8   0   10.63    1.59
   9   8   0    9.40    1.21
   9   8   0   12.59    1.33
  10  -8   0   28.62    1.95
  10  -8   0   27.80    1.96
 -10  -8   0   25.22    2.12
 -10  -8   0   25.95    1.88
  10  -8   0   27.25    1.57
 -10  -8   0   22.28    1.95
  10   8   0   25.94    2.00
  10   8   0   26.89    1.91
  10   8   0   21.67    1.72
 -11  -8   0    4.49    0.89
 -11  -8   0    4.75    1.19
  11  -8   0    4.89    0.86
 -11  -8   0    3.38    0.77
  11  -8   0    4.44    0.51
  11  -8   0    4.82    0.63
  11  -8   0    4.34    0.74
  11   8   0    4.80    0.79
  11   8   0    4.77    0.85
  11   8   0    4.03    0.64
  12  -8   0   44.87    2.25
  12  -8   0   44.53    2.46
  12  -8   0   45.34    2.42
  12  -8   0   44.85    2.18
 -12  -8   0   43.18    2.39
  12   8   0   41.60    2.46
   0  -9   0    0.92    0.63
   0  -9   0    0.29    0.53
   0  -9   0    0.42    0.58
   0  -9   0   -0.02    0.38
   0   9   0    0.17    0.41
  -1  -9   0   41.63    2.08
  -1  -9   0   49.18    2.49
   1  -9   0   50.97    2.89
  -1  -9   0   51.37    3.02
   1  -9   0   52.87    3.07
   1  -9   0   50.34    2.54
  -1   9   0   53.79    2.58
   1   9   0   49.61    2.49
  -2  -9   0   13.80    0.89
   2  -9   0   12.73    1.37
   2  -9   0   12.58    1.39
  -2  -9   0   13.97    1.05
   2  -9   0   14.22    1.21
  -2  -9   0   12.73    1.43
   2  -9   0   14.56    1.15
   2   9   0   12.99    1.02
  -2   9   0   14.53    1.15
  -3  -9   0   14.31    1.04
   3  -9   0   14.55    1.48
  -3  -9   0   10.13    1.31
  -3  -9   0   16.23    1.06
   3  -9   0   16.22    1.16
   3  -9   0   16.27    1.48
   3  -9   0   13.33    1.17
   3   9   0   13.40    1.44
   3   9   0   14.90    1.02
  -3   9   0   14.17    1.15
   4  -9   0    9.00    1.17
   4  -9   0   10.52    1.02
   4  -9   0   10.86    0.98
  -4  -9   0   12.14    1.00
  -4  -9   0   11.63    0.83
  -4  -9   0   12.50    1.29
   4  -9   0    7.66    1.09
   4   9   0   12.69    1.29
  -4   9   0   11.51    1.07
   5  -9   0    0.80    0.40
   5  -9   0    0.13    0.50
   5  -9   0    2.20    0.47
   5  -9   0   -0.55    0.39
  -5  -9   0    0.96    0.62
  -5  -9   0    0.99    0.45
   5   9   0    0.62    0.78
  -5   9   0    0.55    0.39
   5   9   0    1.17    0.58
  -6  -9   0   34.83    2.14
  -6  -9   0   32.56    1.89
   6  -9   0   30.73    2.03
   6  -9   0   33.82    1.80
   6  -9   0   28.27    2.01
  -6   9   0   33.12    1.81
   6   9   0   31.81    2.39
   6   9   0   29.96    2.03
   7  -9   0    0.45    0.32
   7  -9   0    0.53    0.41
   7  -9   0    0.48    0.42
   7  -9   0    0.48    0.39
  -7  -9   0    0.93    0.55
  -7  -9   0    0.68    0.46
   7   9   0    0.79    0.60
  -7   9   0   -0.05    0.36
   7   9   0   -0.05    0.41
   8  -9   0   23.03    1.60
   8  -9   0   23.42    1.56
   8  -9   0   24.85    1.34
   8  -9   0   25.25    1.39
   8   9   0   23.74    1.62
   8   9   0   23.09    1.71
  -8   9   0   24.58    1.38
  22   0  -1    0.03    0.30
 -22   0   1    0.67    0.44
  21   0  -1   46.11    2.53
 -21   0   1   52.50    2.54
 -21   0   1   49.51    2.59
  20   0  -1    0.35    0.52
 -20   0   1   -0.18    0.46
 -20   0   1    0.47    0.52
  20   0  -1    0.61    0.49
 -19   0   1   31.10    2.10
  19   0  -1   28.87    1.57
  19   0  -1   27.95    1.96
  19   0  -1   29.04    2.13
  19   0  -1   29.78    1.61
 -19   0   1   31.10    2.06
  18   0  -1    0.74    0.75
  18   0  -1    0.57    0.64
 -18   0   1   -0.32    0.67
  18   0  -1   -0.78    0.66
  18   0  -1    0.55    0.42
  18   0  -1    0.37    0.39
 -18   0   1    0.54    0.69
  18   0  -1    1.13    0.59
  18   0  -1   -0.59    0.39
  17   0  -1    3.00    0.87
  17   0  -1    0.89    0.54
  17   0  -1    0.94    0.52
  17   0  -1    0.51    0.71
  17   0  -1    2.59    1.06
 -17   0   1    1.77    0.89
  17   0  -1    0.73    0.53
  17   0  -1    0.90    0.70
  16   0  -1    0.40    0.49
 -16   0   1    0.14    0.89
  16   0  -1   -0.41    0.54
  16   0  -1    0.49    0.51
  16   0  -1   -0.07    0.48
  16   0  -1    0.10    0.49
  16   0  -1    1.36    0.98
  16   0  -1    0.42    0.54
  16   0  -1   -0.01    0.75
  15   0  -1   19.61    1.70
  15   0  -1   21.78    1.66
  15   0  -1   20.11    1.58
  15   0  -1   21.87    1.65
  15   0  -1   20.30    1.94
 -15   0   1   20.47    2.59
  15   0  -1   19.45    1.67
  15   0  -1   18.85    1.52
 -14   0   1    0.04    0.78
  14   0  -1    0.43    0.65
  14   0  -1    0.44    0.48
  14   0  -1    1.46    0.62
  14   0  -1    0.34    0.61
 -13   0   1   99.07    5.73
  13   0  -1   96.90    7.10
  13   0  -1   94.33    4.59
 -13   0   1   86.36    5.03
  13   0  -1   96.72    4.69
  13   0  -1   93.64    5.45
 -12   0   1    0.34    0.55
 -12   0   1    0.42    0.53
  12   0  -1   -0.10    0.91
  12   0  -1    0.03    0.39
 -11   0   1  313.64   13.43
  11   0  -1  309.74   13.00
 -11   0   1  299.51   13.93
  11   0  -1  293.57   15.07
 -10   0   1    0.27    0.37
 -10   0   1    0.40    0.52
  10   0  -1   -0.06    0.30
  10   0  -1   -0.33    0.45
   9   0  -1  269.56   12.37
   9   0  -1  244.54   10.31
  -9   0   1  245.73   10.80
  -9   0   1  246.31   11.28
   9   0  -1  235.59   10.52
   8   0  -1    0.10    0.30
   8   0  -1    0.00    0.17
   8   0  -1    0.17    0.50
  -8   0   1    0.47    0.45
  -8   0   1    0.41    0.36
  -7   0   1  194.28    8.15
  -7   0   1  191.76   11.46
   7   0  -1  196.85   10.80
  -7   0   1  188.23    8.53
   7   0  -1  170.49    8.00
   7   0  -1  183.42    9.18
   6   0  -1    0.09    0.39
  -6   0   1    0.19    0.52
  -6   0   1    0.15    0.25
  -6   0   1    0.11    0.39
  -6   0   1    0.30    0.31
  -6   0   1    0.06    0.75
   6   0  -1    0.45    0.49
   6   0  -1    0.51    0.64
   6   0  -1    0.18    0.27
  -5   0   1  138.32    6.41
  -5   0   1  145.35    8.46
   5   0  -1  168.96    8.40
   5   0  -1  138.04    6.26
  -5   0   1  150.96    6.30
   5   0  -1  133.97    6.87
  -5   0   1  161.68    7.17
   5   0  -1  135.33    6.99
  -5   0   1  148.17    6.59
  -4   0   1    0.32    0.24
   4   0  -1   -0.15    0.48
  -4   0   1    0.48    0.33
  -4   0   1    0.07    0.36
  -4   0   1    0.05    0.56
   4   0  -1   -0.26    0.32
   4   0  -1    0.38    0.24
   4   0  -1    0.03    0.34
  -4   0   1   -0.02    0.25
   3   0  -1    0.70    0.66
   3   0  -1    0.36    0.17
  -3   0   1    0.60    0.67
   3   0  -1    0.51    0.39
  -3   0   1    0.16    0.25
  -3   0   1    0.31    0.22
  -3   0   1    0.82    0.46
  -2   0   1    0.44    0.25
  -2   0   1    0.10    0.35
   2   0  -1    0.34    0.38
  -2   0   1    0.29    0.21
   2   0  -1    0.07    0.52
   2   0  -1    0.20    0.32
  -2   0   1    0.04    0.53
  -1   0   1   12.96    0.66
   1   0  -1   14.24    1.20
   1   0  -1   11.94    0.81
   1   0  -1   10.12    0.79
  -1   0   1   11.67    0.81
   1   0  -1   10.54    0.61
  -1   0   1   11.94    1.13
  -1   0   1    9.77    0.60
  -1   0   1   10.32    0.78
   0   0   1    0.37    0.22
   0   0  -1    0.34    0.21
   0   0   1    0.22    0.33
   0   0   1    0.05    0.08
   0   0  -1    0.23    0.36
   0   0   1    0.52    0.24
   0   0  -1    0.39    0.24
  -1   0  -1  356.12   14.28
  -1   0  -1  364.22   14.22
   1   0   1  335.25   14.17
   1   0   1  287.89   13.81
  -2   0  -1    0.47    0.22
  -2   0  -1    0.15    0.31
   2   0   1   -0.08    0.17
   2   0   1    0.01    0.07
   2   0   1    0.12    0.31
   3   0   1  205.80    7.93
   3   0   1  164.96    8.31
  -3   0  -1  219.04    9.31
   3   0   1  202.47    9.01
  -3   0  -1  186.71    8.35
  -3   0  -1  201.72    8.09
   3   0   1  165.90    8.28
   3   0   1  196.88    7.91
   4   0   1    0.44    0.37
   4   0   1    0.49    0.57
  -4   0  -1   -0.06    0.26
  -4   0  -1   -0.13    0.48
   4   0   1    0.20    0.15
   4   0   1    0.16    0.12
  -4   0  -1    0.13    0.35
   4   0   1   -0.04    0.31
   5   0   1  135.58    5.72
  -5   0  -1  129.00    6.11
   5   0   1  126.44    6.45
   5   0   1  137.64    5.73
  -5   0  -1  151.18    8.03
   5   0   1  151.93    7.57
   6   0   1    0.17    0.57
  -6   0  -1    0.06    0.23
  -6   0  -1   -0.13    0.31
   6   0   1    0.38    0.45
   6   0   1    0.10    0.39
  -6   0  -1    0.13    0.75
   7   0   1  173.36    8.71
   7   0   1  186.64    9.95
  -7   0  -1  181.54    7.83
  -7   0  -1  178.13    8.13
   7   0   1  188.79    7.67
   8   0   1   -0.22    0.23
  -8   0  -1    0.41    0.37
  -8   0  -1    1.44    0.45
   8   0   1   -0.01    0.41
  -9   0  -1  384.06   16.40
   9   0   1  374.18   15.71
  -9   0  -1  361.23   16.02
   9   0   1  390.34   17.32
 -10   0  -1    0.56    0.51
  10   0   1    0.12    0.30
  10   0   1    0.43    0.60
 -10   0  -1    0.03    0.44
 -11   0  -1   28.81    2.30
  11   0   1   32.95    3.04
  11   0   1   28.45    1.71
 -11   0  -1   27.04    2.07
  12   0   1    0.57    0.86
 -12   0  -1    0.47    0.53
 -12   0  -1   -0.26    0.54
  12   0   1    0.51    0.33
  12   0   1    1.34    0.52
  13   0   1   98.61    4.42
 -13   0  -1   81.58    5.22
 -13   0  -1   89.13    5.06
  13   0   1   92.66    4.41
  13   0   1   92.21    4.48
  14   0   1    0.12    0.47
  14   0   1    1.83    0.68
  14   0   1   -0.09    0.37
 -14   0  -1    0.82    0.87
  14   0   1    0.81    0.54
  14   0   1   -0.02    0.40
  14   0   1   -0.45    0.51
  15   0   1   69.87    3.87
  15   0   1   69.94    3.63
  15   0   1   71.85    3.61
  15   0   1   72.23    3.79
 -15   0  -1   77.51    4.98
  15   0   1   68.61    3.58
  15   0   1   73.79    3.74
  16   0   1   -0.23    0.68
  16   0   1    0.48    0.50
  16   0   1   -0.44    0.47
 -16   0  -1   -0.28    1.01
  16   0   1   -0.79    0.41
  16   0   1    0.12    0.44
  16   0   1    0.00    0.44
  17   0   1   86.07    3.76
  17   0   1   81.08    3.93
  17   0   1   85.83    4.54
 -17   0  -1   86.85    4.44
  17   0   1   86.16    3.96
  17   0   1   85.15    4.36
  17   0   1   84.92    4.34
  17   0   1   78.85    4.26
  18   0   1    0.16    0.33
  18   0   1   -0.13    0.59
 -18   0  -1   -0.57    0.68
  18   0   1    0.03    0.76
  18   0   1    0.08    0.52
  18   0   1    0.12    0.22
  19   0   1  120.51    5.69
 -19   0  -1  125.44    5.71
 -19   0  -1  118.67    5.68
  19   0   1  121.78    5.75
  20   0   1    0.37    0.42
 -20   0  -1    0.00    0.43
  20   0   1    0.09    0.45
 -20   0  -1    0.23    0.45
 -21   0  -1   70.84    3.34
  21   0   1   74.18    3.37
  21   0   1   70.06    3.30
 -21   0  -1   69.63    3.34
  21  -1  -1   10.79    0.99
 -21  -1   1   11.04    0.98
 -21  -1   1   12.56    0.98
  21  -1  -1   11.32    0.98
 -21  -1   1    9.82    1.18
  21   1  -1   10.29    0.97
 -21   1   1   12.41    1.10
 -21   1   1   11.99    0.99
  20  -1  -1   13.76    1.22
 -20  -1   1   12.99    1.27
 -20  -1   1   14.41    1.53
 -20  -1   1   12.13    1.21
  20  -1  -1   13.78    1.30
 -20   1   1   12.88    1.32
  20   1  -1   15.29    1.26
  20   1  -1   14.80    0.91
  20   1  -1   14.40    0.95
  20   1  -1   14.08    1.25
 -20   1   1   13.35    1.32
 -19  -1   1   35.39    2.31
  19  -1  -1   42.92    2.42
  19  -1  -1   38.17    2.34
 -19  -1   1   36.80    2.32
  19  -1  -1   39.60    2.51
  19   1  -1   36.95    2.14
  19   1  -1   39.72    2.16
  19   1  -1   33.63    2.34
 -19   1   1   39.27    2.45
  19   1  -1   37.09    2.09
  19   1  -1   38.92    2.38
 -19   1   1   40.25    2.41
  18  -1  -1    7.34    0.60
  18  -1  -1    6.17    1.01
  18  -1  -1    7.18    0.68
 -18  -1   1    7.67    1.13
 -18  -1   1    7.89    1.14
  18  -1  -1    6.80    1.10
  18  -1  -1    8.57    1.31
  18  -1  -1    7.76    1.16
  18   1  -1    7.42    1.12
  18   1  -1    7.24    1.12
  18   1  -1    8.04    1.00
 -18   1   1    8.92    1.21
  18   1  -1    6.86    0.97
  18   1  -1    8.42    1.06
  17  -1  -1   76.72    3.62
  17  -1  -1   70.25    3.98
  17  -1  -1   80.23    3.63
  17  -1  -1   75.73    3.44
  17  -1  -1   76.17    4.14
 -17  -1   1   75.04    4.11
  17  -1  -1   78.94    4.10
 -17  -1   1   72.46    4.06
  17   1  -1   79.98    4.12
  17   1  -1   77.83    4.04
  17   1  -1   76.43    3.73
 -17   1   1   79.33    4.20
  17   1  -1   74.45    4.19
  17   1  -1   75.99    3.99
  17   1  -1   82.47    4.02
  16  -1  -1    0.42    0.46
  16  -1  -1   -0.32    0.54
  16  -1  -1   -2.04    0.69
  16  -1  -1   -0.02    0.39
  16  -1  -1   -0.20    0.46
 -16  -1   1   -0.21    0.84
 -16  -1   1    0.63    0.79
  16  -1  -1    0.64    0.42
  16   1  -1    1.10    0.78
  16   1  -1    0.73    0.65
  16   1  -1   -0.06    0.57
  16   1  -1    0.19    0.56
  16   1  -1   -0.32    0.88
  16   1  -1   -0.08    0.59
  16   1  -1    0.22    0.67
  16   1  -1    0.67    0.59
  15  -1  -1  141.71    6.95
  15  -1  -1  145.09    6.53
 -15  -1   1  136.76    6.84
  15  -1  -1  149.40    6.52
  15  -1  -1  148.15    6.85
  15  -1  -1  152.86    6.84
 -15  -1   1  136.61    6.87
  15  -1  -1  153.63    7.85
  15  -1  -1  146.91    6.55
  15   1  -1  147.15    6.79
 -15   1   1  140.03    7.99
  15   1  -1  136.46    6.83
  15   1  -1  151.05    6.86
  15   1  -1  147.51    7.01
  15   1  -1  144.93    7.06
  15   1  -1  146.74    6.88
  15   1  -1  145.17    6.94
  15   1  -1  141.61    6.73
  14  -1  -1    0.88    0.52
  14  -1  -1    2.65    0.77
  14  -1  -1    1.07    0.55
 -14  -1   1    1.59    1.15
  14  -1  -1    1.39    0.53
  14  -1  -1    1.81    0.60
 -14  -1   1    0.75    0.90
  14   1  -1    2.52    0.88
  14   1  -1    1.18    0.64
 -14   1   1    0.92    0.92
  14   1  -1    0.88    0.68
  14   1  -1    1.39    0.84
  14   1  -1    2.32    0.79
  13  -1  -1  207.83    9.04
  13  -1  -1  205.68    8.84
 -13  -1   1  201.62    9.67
 -13  -1   1  219.09   10.56
  13  -1  -1  199.15    9.03
 -13   1   1  200.19    9.53
 -13   1   1  196.75   10.10
  13   1  -1  205.16    8.45
  13   1  -1  204.92    9.05
  13   1  -1  193.38    9.15
  13   1  -1  191.65    9.29
  12  -1  -1   36.89    2.20
  12  -1  -1   34.50    2.13
 -12  -1   1   32.86    2.51
 -12  -1   1   37.78    3.05
  12   1  -1   36.43    2.16
 -12   1   1   41.45    3.03
  12   1  -1   38.05    1.94
 -12   1   1   31.40    2.37
  12   1  -1   36.97    3.82
 -11  -1   1   16.71    1.88
  11  -1  -1   16.32    2.26
 -11  -1   1   17.19    1.56
  11  -1  -1   15.14    1.22
  11   1  -1   16.82    2.42
 -11   1   1   16.21    1.45
 -11   1   1   14.98    1.77
  11   1  -1   15.11    1.21
  11   1  -1   16.40    1.09
 -10  -1   1   36.82    2.32
 -10  -1   1   29.65    2.51
  10  -1  -1   35.78    1.95
  10  -1  -1   38.93    3.45
  10   1  -1   35.81    3.39
 -10   1   1   35.56    2.17
 -10   1   1   31.34    2.52
  10   1  -1   34.64    1.92
  10   1  -1   34.05    1.96
  -9  -1   1   25.72    1.79
  -9  -1   1   24.30    2.06
   9  -1  -1   24.87    3.26
   9  -1  -1   26.80    2.64
   9  -1  -1   25.11    1.47
  -9   1   1   26.74    2.09
  -9   1   1   23.67    1.61
   9   1  -1   26.80    1.55
   9   1  -1   26.89    1.56
   9   1  -1   24.92    2.64
   8  -1  -1   49.47    2.45
  -8  -1   1   53.19    2.82
   8  -1  -1   50.39    4.64
  -8  -1   1   54.23    3.18
   8  -1  -1   58.05    3.93
   8  -1  -1   50.54    2.56
  -8   1   1   55.68    3.19
   8   1  -1   50.97    2.55
  -8   1   1   50.62    2.62
   8   1  -1   46.10    3.65
  -7  -1   1   12.82    2.60
  -7  -1   1   10.19    1.16
   7  -1  -1   13.65    1.91
   7  -1  -1   12.15    2.16
   7  -1  -1    9.84    0.73
  -7  -1   1   11.22    0.98
  -7  -1   1   10.62    1.58
   7  -1  -1   11.17    1.52
   7  -1  -1   10.67    0.81
  -7   1   1   12.33    1.21
  -7   1   1   10.51    0.82
   7   1  -1   10.10    0.82
   7   1  -1   11.56    1.52
   6  -1  -1   95.83    4.31
  -6  -1   1   87.44    5.25
   6  -1  -1   95.43    5.93
   6  -1  -1   95.21    5.38
  -6  -1   1   96.77    7.13
   6  -1  -1  108.86    6.74
  -6  -1   1   87.69    4.68
  -6  -1   1   99.31    4.47
  -6   1   1   94.24    4.65
  -6   1   1   97.02    4.25
  -6   1   1  108.37    7.16
   6   1  -1   97.01    5.35
   5  -1  -1   56.89    4.52
  -5  -1   1   64.24    5.05
  -5  -1   1   61.88    2.89
  -5  -1   1   59.29    3.57
  -5  -1   1   62.49    5.30
   5  -1  -1   66.69    4.24
   5  -1  -1   61.11    3.38
   5  -1  -1   58.11    2.76
   5  -1  -1   60.17    2.56
  -5  -1   1   57.06    3.08
   5  -1  -1   57.81    3.66
  -5   1   1   58.18    3.67
  -5   1   1   62.80    4.86
   5   1  -1   62.54    4.89
   5   1  -1   56.84    3.55
  -5   1   1   61.74    2.67
  -5   1   1   52.98    2.95
   4  -1  -1   14.41    2.08
   4  -1  -1   17.44    1.60
   4  -1  -1   16.03    1.80
  -4  -1   1   13.13    1.30
  -4  -1   1   14.93    2.29
   4  -1  -1   15.74    1.35
  -4  -1   1   15.27    2.12
   4  -1  -1   13.31    0.73
  -4  -1   1   16.05    0.98
  -4  -1   1   12.55    1.06
   4  -1  -1   13.67    0.89
  -4   1   1   14.00    1.00
  -4   1   1   13.75    0.75
   4   1  -1   13.93    0.90
   4   1  -1   16.57    1.47
  -4   1   1   12.22    1.40
  -4   1   1   14.47    2.09
   4   1  -1   16.00    2.09
  -3  -1   1  958.62   39.65
  -3  -1   1  953.74   37.67
  -3  -1   1  972.84   38.27
   3  -1  -1  898.57   38.66
   3  -1  -1  866.47   37.50
   3  -1  -1  834.57   37.65
  -3  -1   1  962.14   40.17
   3  -1  -1  815.09   38.91
   3   1  -1  984.82   37.71
  -3   1   1  914.28   37.68
  -3   1   1  951.95   37.48
  -3   1   1  794.25   38.46
   3   1  -1  965.67   39.75
   3   1  -1  955.69   38.34
  -3   1   1 1000.00   40.03
  -2  -1   1   14.98    1.67
  -2  -1   1   15.74    1.17
   2  -1  -1   16.27    1.86
   2  -1  -1   16.07    1.42
   2  -1  -1   13.40    0.76
  -2  -1   1   15.55    1.88
   2  -1  -1   13.10    1.71
  -2  -1   1   15.67    0.83
   2  -1  -1   13.23    1.35
   2   1  -1   13.93    0.86
  -2   1   1   14.62    1.52
   2   1  -1   13.98    1.65
  -2   1   1   14.86    2.07
  -2   1   1   14.49    0.74
  -2   1   1   13.94    1.94
  -2   1   1   15.59    0.87
   1  -1  -1  504.16   24.77
  -1  -1   1  614.00   24.53
  -1  -1   1  612.05   25.60
   1  -1  -1  558.71   25.13
   1  -1  -1  604.74   26.47
   1  -1  -1  609.20   24.02
  -1  -1   1  579.03   25.15
   1  -1  -1  599.70   25.69
   1   1  -1  608.28   25.62
  -1   1   1  588.16   24.99
  -1   1   1  605.97   27.18
  -1   1   1  575.05   24.18
  -1   1   1  605.75   24.14
   1   1  -1  616.10   24.16
   1   1  -1  585.98   25.26
   0  -1  -1    5.82    0.77
   0  -1  -1    5.99    0.81
   0  -1  -1    6.43    0.42
   0  -1  -1    5.94    1.40
   0  -1   1    5.60    0.51
   0  -1   1    6.00    0.73
   0  -1  -1    5.59    1.10
   0  -1   1    5.97    0.96
   0   1   1    5.09    0.42
   0   1   1    6.60    1.17
   0   1   1    5.71    0.44
   0   1  -1    7.32    1.01
   0   1  -1    6.38    0.81
   0   1   1    5.54    1.37
   1  -1   1  178.49    7.95
  -1  -1  -1  196.63    9.86
  -1  -1  -1  191.27    7.94
  -1  -1  -1  187.71    8.47
   1  -1   1  183.51    8.17
   1   1   1  187.01    7.94
   1   1   1  191.00    9.80
  -1   1  -1  174.20    8.26
   1   1   1  189.99    7.96
  -1   1  -1  200.90    9.11
   1   1   1  217.91    9.75
  -2  -1  -1    4.98    0.48
  -2  -1  -1    4.64    1.14
  -2  -1  -1    4.64    0.68
   2  -1   1    5.39    0.48
  -2  -1  -1    5.55    1.33
   2   1   1    4.58    1.12
   2   1   1    5.75    1.31
   2   1   1    4.71    0.44
   2   1   1    5.06    0.44
  -2   1  -1    4.96    0.77
  -2   1  -1    5.93    0.74
  -3  -1  -1   51.73    4.10
   3  -1   1   55.23    2.35
   3  -1   1   52.30    2.57
  -3  -1  -1   41.53    2.78
  -3  -1  -1   44.14    2.45
  -3  -1  -1   49.43    2.34
   3  -1   1   45.61    2.12
  -3  -1  -1   47.66    3.82
  -3   1  -1   54.44    2.99
   3   1   1   47.74    2.22
   3   1   1   53.51    3.94
   3   1   1   47.50    2.28
  -4  -1  -1  104.71    5.63
  -4  -1  -1  133.67    5.56
   4  -1   1  140.25    5.98
   4  -1   1  119.36    5.57
   4  -1   1  119.10    5.30
  -4  -1  -1  136.20    7.81
  -4  -1  -1  119.33    7.81
   4   1   1  141.43    7.78
  -4   1  -1  129.02    6.62
   4   1   1  126.55    5.47
  -5  -1  -1   49.44    2.82
   5  -1   1   51.97    2.41
  -5  -1  -1   52.10    4.59
   5  -1   1   61.89    2.88
   5  -1   1   54.46    3.09
  -5  -1  -1   53.84    2.67
  -5  -1  -1   42.55    3.18
   5   1   1   52.73    2.56
  -5   1  -1   59.40    4.05
   5   1   1   61.80    4.75
  -5   1  -1   49.99    2.51
   5   1   1   59.68    3.50
  -6  -1  -1   76.16    4.64
  -6  -1  -1   76.16    4.04
  -6  -1  -1   79.82    3.84
  -6  -1  -1   94.96    6.86
   6  -1   1   80.10    4.38
   6  -1   1   92.29    4.18
  -6   1  -1   72.81    5.44
  -6   1  -1   81.06    3.86
   6   1   1   82.77    3.69
   6   1   1   76.22    4.65
   6   1   1   82.89    6.20
  -7  -1  -1   67.89    3.25
  -7  -1  -1   63.92    3.47
   7  -1   1   63.15    3.81
   7  -1   1   67.92    3.63
  -7   1  -1   61.67    3.27
   7   1   1   62.04    2.94
   7   1   1   60.89    4.04
   7   1   1   61.97    2.98
  -8  -1  -1   26.33    1.77
  -8  -1  -1   29.53    2.04
   8  -1   1   28.08    2.32
   8  -1   1   24.80    1.37
   8   1   1   26.15    1.46
  -8   1  -1   29.05    1.89
   8   1   1   25.94    2.44
   8   1   1   23.87    1.45
   9  -1   1   74.24    3.40
  -9  -1  -1   74.16    3.89
   9  -1   1   75.52    4.60
  -9  -1  -1   78.79    4.24
  -9   1  -1   65.53    3.89
   9   1   1   77.97    5.01
   9   1   1   74.65    3.34
   9   1   1   72.21    3.47
  10  -1   1   35.69    1.94
  10  -1   1   42.09    3.20
 -10  -1  -1   31.94    2.58
 -10  -1  -1   37.72    2.46
  10   1   1   37.29    2.02
 -10   1  -1   35.37    2.47
 -10   1  -1   38.96    2.57
  10   1   1   35.17    3.34
 -11  -1  -1  395.92   17.24
  11  -1   1  404.54   18.24
 -11  -1  -1  392.77   17.68
  11  -1   1  403.55   16.54
  11   1   1  409.36   16.64
 -11   1  -1  390.41   17.37
  11   1   1  356.87   18.73
 -11   1  -1  398.57   16.99
 -12  -1  -1   -0.48    0.48
  12  -1   1    0.20    0.35
 -12  -1  -1    0.43    0.62
  12  -1   1    0.01    0.36
  12  -1   1    0.43    0.73
  12   1   1    0.40    0.81
 -12   1  -1    0.03    0.54
  12   1   1    0.50    0.40
  12   1   1    0.09    0.48
 -12   1  -1    0.03    0.49
  13  -1   1  166.03    7.64
  13  -1   1  166.67    7.44
  13  -1   1  173.60    7.64
 -13  -1  -1  164.31    8.45
 -13  -1  -1  194.16    9.20
  13   1   1  158.55    7.77
 -13   1  -1  161.49    8.23
 -13   1  -1  177.35    8.65
  13   1   1  172.40    7.79
  13   1   1  178.77    7.75
  14  -1   1   72.09    3.64
  14  -1   1   72.36    3.40
  14  -1   1   69.90    3.38
 -14  -1  -1   72.33    4.98
  14  -1   1   67.36    3.40
  14  -1   1   72.18    3.65
  14   1   1   68.69    3.64
  14   1   1   68.40    3.79
  14   1   1   70.46    3.88
  14   1   1   73.04    3.74
  14   1   1   69.67    3.76
 -14   1  -1   73.58    4.58
  14   1   1   75.80    3.76
  15  -1   1   21.79    1.59
  15  -1   1   22.97    2.63
 -15  -1  -1   19.31    2.01
  15  -1   1   22.37    1.26
  15  -1   1   23.39    1.65
  15  -1   1   21.14    1.39
  15  -1   1   20.06    1.37
  15   1   1   22.42    1.73
  15   1   1   21.11    1.67
  15   1   1   19.65    1.79
  15   1   1   22.78    1.75
  15   1   1   21.94    1.63
  15   1   1   24.13    2.18
 -15   1  -1   21.38    2.30
  15   1   1   20.85    1.82
  16  -1   1   14.78    1.32
 -16  -1  -1   13.74    1.60
  16  -1   1   16.38    1.05
  16  -1   1   15.79    1.32
  16  -1   1   14.96    1.66
  16  -1   1   15.54    1.00
  16   1   1   15.66    1.58
  16   1   1   14.57    1.23
  16   1   1   15.04    1.80
  16   1   1   16.23    1.54
  16   1   1   15.18    1.39
  16   1   1   16.19    1.44
  16   1   1   15.19    1.42
  17  -1   1   26.91    1.86
  17  -1   1   28.12    2.01
  17  -1   1   28.76    1.90
 -17  -1  -1   25.89    2.06
 -17  -1  -1   27.43    2.11
  17   1   1   24.43    2.08
  17   1   1   28.18    1.86
  17   1   1   28.40    1.89
  17   1   1   26.45    2.01
  17   1   1   30.86    1.93
  17   1   1   28.06    2.07
  18  -1   1   19.90    1.58
 -18  -1  -1   17.45    1.57
 -18  -1  -1   17.62    1.62
  18  -1   1   18.42    1.44
  18   1   1   19.90    1.69
  18   1   1   17.74    1.27
  18   1   1   20.23    1.38
 -18   1  -1   16.25    1.62
  18   1   1   20.36    1.58
  18   1   1   18.59    1.35
  19  -1   1    0.21    0.45
 -19  -1  -1   -0.56    0.51
  19  -1   1   -0.04    0.57
 -19  -1  -1   -0.24    0.50
 -19  -1  -1   -0.26    0.57
  19   1   1   -0.19    0.27
  19   1   1    0.29    0.46
  19   1   1    0.65    0.51
 -19   1  -1   -0.71    0.60
  20  -1   1   22.90    1.58
 -20  -1  -1   20.72    1.47
  20  -1   1   24.79    1.55
 -20  -1  -1   22.50    1.50
 -20   1  -1   22.71    1.58
  20   1   1   22.10    1.55
  20   1   1   21.75    1.45
 -20   1  -1   23.03    1.54
 -21  -1  -1   17.33    1.13
  21  -1   1   17.72    1.15
 -21  -1  -1   17.95    1.14
  21   1   1   16.84    1.10
 -21   1  -1   17.31    1.20
  21   1   1   18.10    1.17
 -21   1  -1   16.86    1.19
  21  -2  -1    9.54    0.84
  21  -2  -1    8.86    0.86
 -21  -2   1    6.73    0.64
 -21  -2   1    7.59    0.93
 -21   2   1   10.57    0.91
 -21   2   1    7.10    0.77
 -20  -2   1   31.83    1.83
 -20  -2   1   30.40    2.22
  20  -2  -1   29.62    1.85
 -20  -2   1   33.19    1.86
  20  -2  -1   30.68    1.87
  20  -2  -1   30.33    1.95
  20   2  -1   31.70    1.79
  20   2  -1   33.31    1.86
 -20   2   1   35.12    1.97
 -20   2   1   34.01    2.00
  20   2  -1   32.62    1.81
  20   2  -1   34.07    1.61
  19  -2  -1    9.93    1.20
  19  -2  -1    7.57    1.03
 -19  -2   1    7.33    0.91
 -19  -2   1   12.33    1.59
  19  -2  -1    7.32    0.94
 -19  -2   1   10.19    1.12
 -19   2   1    8.42    1.05
  19   2  -1    6.17    0.92
  19   2  -1    7.37    0.93
  19   2  -1    8.47    1.06
  19   2  -1    7.94    1.04
  19   2  -1    8.91    1.03
 -18  -2   1   75.10    3.88
  18  -2  -1   75.09    3.84
 -18  -2   1   81.36    4.51
 -18  -2   1   69.09    3.78
  18  -2  -1   71.37    3.98
  18  -2  -1   77.29    3.96
  18   2  -1   73.21    3.88
  18   2  -1   73.47    3.84
  18   2  -1   72.39    3.94
  18   2  -1   76.26    3.62
  18   2  -1   76.12    3.91
  18   2  -1   72.08    3.96
  17  -2  -1    7.24    1.04
  17  -2  -1    5.74    0.92
 -17  -2   1    7.62    1.16
  17  -2  -1    4.96    1.39
  17  -2  -1    6.49    1.09
 -17  -2   1    5.64    1.05
  17   2  -1    6.08    1.02
  17   2  -1    5.98    1.04
  17   2  -1    7.30    1.19
  17   2  -1    5.22    1.03
  17   2  -1    5.47    1.06
  17   2  -1    4.43    1.06
 -16  -2   1   73.71    3.94
  16  -2  -1   71.29    3.32
  16  -2  -1   75.34    3.94
  16  -2  -1   75.61    3.37
  16  -2  -1   73.55    4.77
  16  -2  -1   72.27    4.12
  16  -2  -1   72.84    3.90
 -16  -2   1   75.72    3.99
  16   2  -1   78.34    4.12
  16   2  -1   72.14    3.96
  16   2  -1   76.26    4.22
  16   2  -1   74.94    4.04
  16   2  -1   79.60    4.03
  16   2  -1   72.53    4.05
  15  -2  -1   10.47    1.25
  15  -2  -1   11.64    1.35
  15  -2  -1    9.28    0.76
 -15  -2   1   10.95    1.37
  15  -2  -1    8.99    0.89
 -15  -2   1   10.50    1.37
  15  -2  -1    9.45    1.75
  15  -2  -1    8.52    0.84
  15   2  -1   12.80    1.57
  15   2  -1   11.31    1.68
  15   2  -1   10.57    1.49
  15   2  -1   12.52    1.49
  15   2  -1   12.13    1.61
 -15   2   1    9.90    1.76
  15   2  -1   11.06    1.54
  14  -2  -1   44.67    2.28
  14  -2  -1   47.20    2.30
 -14  -2   1   44.63    2.82
  14  -2  -1   46.98    3.70
 -14  -2   1   47.00    2.78
  14  -2  -1   43.50    2.62
  14  -2  -1   41.84    2.59
  14  -2  -1   42.40    2.28
 -14   2   1   39.56    3.43
  14   2  -1   44.24    2.88
  14   2  -1   39.30    2.80
  14   2  -1   44.80    2.20
  14   2  -1   44.34    2.87
  14   2  -1   44.98    2.99
  14   2  -1   45.58    2.90
  14   2  -1   45.12    2.84
  13  -2  -1   55.61    3.03
  13  -2  -1   60.27    2.76
  13  -2  -1   54.70    3.03
 -13  -2   1   50.59    3.57
  13   2  -1   58.33    3.13
  13   2  -1   55.83    3.30
  13   2  -1   50.21    2.64
 -13   2   1   52.45    3.46
  13   2  -1   59.13    2.83
 -13   2   1   52.47    3.90
  12  -2  -1   33.41    3.11
  12  -2  -1   32.73    2.09
 -12  -2   1   33.45    2.54
  12  -2  -1   34.97    2.09
  12   2  -1   37.92    4.21
  12   2  -1   33.08    2.12
  12   2  -1   33.07    1.97
 -12   2   1   33.47    2.86
 -12   2   1   32.03    2.36
  12   2  -1   31.07    1.97
 -11  -2   1  163.36    7.87
  11  -2  -1  152.47    8.78
  11  -2  -1  169.04    7.35
  11   2  -1  166.38   10.07
 -11   2   1  169.41    7.69
  11   2  -1  167.28    7.45
 -11   2   1  166.03    8.40
  11   2  -1  160.04    7.39
  10  -2  -1    5.13    0.72
  10  -2  -1    3.83    0.61
 -10  -2   1    5.01    1.00
  10  -2  -1    3.98    1.27
  10   2  -1    4.51    1.64
 -10   2   1    2.98    0.98
  10   2  -1    5.16    0.84
 -10   2   1    4.30    0.85
  10   2  -1    3.89    0.73
  -9  -2   1   53.92    3.08
   9  -2  -1   50.51    2.62
   9  -2  -1   59.62    4.14
   9  -2  -1   52.39    2.70
  -9   2   1   51.56    3.41
  -9   2   1   55.17    2.85
   9   2  -1   58.33    2.96
   9   2  -1   52.96    2.78
   9   2  -1   54.37    4.37
   8  -2  -1   13.72    0.87
   8  -2  -1   13.05    1.77
   8  -2  -1   14.55    1.44
  -8  -2   1   13.20    1.21
   8  -2  -1   12.51    0.94
   8  -2  -1   12.23    1.32
   8   2  -1   13.51    1.97
   8   2  -1   13.66    1.02
  -8   2   1   11.43    1.32
  -8   2   1   14.64    1.05
   8   2  -1   14.33    1.16
  -7  -2   1   48.38    5.48
  -7  -2   1   42.35    2.39
   7  -2  -1   37.74    1.96
   7  -2  -1   35.53    2.95
   7  -2  -1   42.21    2.16
   7  -2  -1   47.80    3.13
   7  -2  -1   42.17    3.23
  -7  -2   1   46.00    3.50
   7   2  -1   40.66    2.18
  -7   2   1   45.25    2.64
  -7   2   1   39.56    2.10
   7   2  -1   48.53    3.62
  -6  -2   1  216.31    9.75
   6  -2  -1  208.76    9.07
  -6  -2   1  224.90   10.56
  -6  -2   1  217.55   13.10
  -6  -2   1  228.81   14.00
   6  -2  -1  198.15   10.24
   6  -2  -1  180.76   10.29
  -6  -2   1  222.18    9.26
  -6   2   1  212.11    8.93
   6   2  -1  215.59   10.65
   6   2  -1  212.23    9.17
  -6   2   1  219.24    9.40
  -5  -2   1   68.26    6.24
   5  -2  -1   70.69    4.37
  -5  -2   1   61.29    3.46
  -5  -2   1   65.16    3.11
  -5  -2   1   59.43    3.07
  -5  -2   1   64.67    4.03
   5  -2  -1   62.71    3.79
   5  -2  -1   58.38    3.02
  -5  -2   1   64.13    5.58
   5  -2  -1   66.44    4.05
  -5   2   1   64.93    3.19
   5   2  -1   63.90    3.15
  -5   2   1   62.69    5.93
   5   2  -1   61.53    3.25
  -5   2   1   59.15    2.81
   5   2  -1   64.69    4.14
   5   2  -1   67.16    5.82
  -4  -2   1  277.02   12.39
   4  -2  -1  234.74   12.18
  -4  -2   1  252.21   11.32
   4  -2  -1  273.34   12.43
   4  -2  -1  259.62   11.41
  -4  -2   1  290.58   11.35
  -4  -2   1  282.03   12.16
  -4  -2   1  278.33   15.17
  -4  -2   1  264.14   14.13
   4   2  -1  280.19   11.47
  -4   2   1  284.27   15.47
   4   2  -1  250.69   11.48
  -4   2   1  260.96   11.38
  -4   2   1  256.25   11.09
   4   2  -1  289.70   14.71
   3  -2  -1    5.30    0.80
   3  -2  -1    6.44    1.37
  -3  -2   1    5.46    1.46
   3  -2  -1    4.64    1.19
  -3  -2   1    5.71    0.97
   3  -2  -1    6.46    1.49
  -3  -2   1    5.58    1.92
  -3  -2   1    4.73    0.61
   3  -2  -1    4.52    1.01
   3   2  -1    6.32    0.68
  -3   2   1    5.08    1.26
   3   2  -1    6.21    1.61
  -3   2   1    6.48    2.42
  -3   2   1    5.85    0.45
  -3   2   1    5.31    0.59
   3   2  -1    6.40    0.67
   2  -2  -1  387.37   17.23
  -2  -2   1  414.13   16.08
  -2  -2   1  406.53   19.49
  -2  -2   1  367.39   16.33
   2  -2  -1  370.68   17.94
   2  -2  -1  356.87   16.47
   2  -2  -1  385.32   19.12
  -2  -2   1  371.11   17.06
  -2   2   1  419.69   17.57
   2   2  -1  439.71   19.17
   2   2  -1  416.45   16.50
   2   2  -1  405.54   16.48
  -2   2   1  398.66   16.27
   2   2  -1  382.14   19.33
  -2   2   1  415.34   21.44
  -2   2   1  381.75   16.41
  -1  -2   1  252.44   10.65
   1  -2  -1  259.85   13.78
   1  -2  -1  225.28   10.08
  -1  -2   1  233.80    9.97
   1  -2  -1  247.55   11.42
  -1  -2   1  246.42   12.78
   1  -2  -1  202.29   11.64
  -1   2   1  208.17    9.97
  -1   2   1  225.15   12.56
   1   2  -1  250.60   12.63
   1   2  -1  271.19   12.40
  -1   2   1  243.54   10.04
   1   2  -1  200.08    9.99
   1   2  -1  250.17   10.04
  -1   2   1  262.01   14.34
  -1   2   1  247.10   10.10
   0  -2  -1  232.21   11.10
   0  -2  -1  232.57   13.85
   0  -2   1  227.12   10.15
   0  -2   1  253.51   10.72
   0  -2  -1  219.49   12.17
   0  -2   1  254.00   12.90
   0  -2  -1  221.11   10.27
   0   2  -1  252.39   10.22
   0   2  -1  254.40   10.07
   0   2   1  249.04   12.91
   0   2  -1  263.72   12.83
   0   2   1  238.07   10.29
   0   2   1  275.31   10.39
   0   2   1  232.78   10.25
   0   2   1  266.73   14.08
   0   2  -1  231.61   11.96
   1  -2   1    2.11    0.69
   1  -2   1    1.15    0.53
   1  -2   1    1.84    0.48
   1  -2   1    2.04    0.34
  -1  -2  -1    3.57    0.91
  -1  -2  -1    3.89    1.68
   1  -2   1    2.25    0.91
  -1  -2  -1    1.27    0.95
   1   2   1    2.73    1.46
   1   2   1    2.22    0.45
   1   2   1    2.97    1.32
  -1   2  -1    2.49    1.20
  -1   2  -1    1.97    0.86
  -1   2  -1    1.56    0.28
   1   2   1    2.77    0.48
   1   2   1    2.15    0.42
  -2  -2  -1    4.25    1.00
  -2  -2  -1    4.01    0.58
  -2  -2  -1    3.88    1.44
   2  -2   1    4.46    0.48
   2  -2   1    4.21    0.50
   2  -2   1    3.78    0.59
   2  -2   1    4.42    0.53
  -2  -2  -1    4.37    1.80
   2  -2   1    4.84    0.98
  -2  -2  -1    4.67    0.52
  -2   2  -1    4.31    1.60
   2   2   1    3.60    0.60
  -2   2  -1    4.19    0.34
   2   2   1    4.46    1.75
   2   2   1    4.33    1.61
   2   2   1    3.77    0.55
   2   2   1    4.00    0.56
  -3  -2  -1   35.22    3.74
  -3  -2  -1   39.00    4.37
   3  -2   1   35.63    1.79
  -3  -2  -1   35.13    2.61
  -3  -2  -1   35.46    1.87
   3  -2   1   35.53    2.12
   3  -2   1   34.11    1.99
  -3  -2  -1   33.16    2.14
   3   2   1   31.55    1.95
   3   2   1   39.20    3.96
   3   2   1   36.48    1.88
   3   2   1   37.55    1.92
   3   2   1   36.55    4.18
  -3   2  -1   32.62    1.55
  -3   2  -1   36.67    3.82
   4  -2   1    4.56    0.43
  -4  -2  -1    5.46    1.65
  -4  -2  -1    4.96    2.08
  -4  -2  -1    5.07    0.90
  -4  -2  -1    6.28    1.17
   4  -2   1    4.18    0.60
   4  -2   1    4.35    0.62
  -4  -2  -1    6.55    0.68
   4   2   1    5.08    0.81
  -4   2  -1    4.06    0.33
   4   2   1    5.46    1.91
  -4   2  -1    4.77    1.66
  -4   2  -1    4.33    0.36
   4   2   1    4.83    0.55
   4   2   1    4.04    0.61
  -5  -2  -1  136.51    9.18
   5  -2   1  122.94    5.94
  -5  -2  -1  137.67    5.88
  -5  -2  -1  137.98    6.28
  -5  -2  -1  125.04    7.03
   5  -2   1  133.54    5.48
   5   2   1  113.56    5.60
  -5   2  -1  132.40    8.33
   5   2   1  130.12    5.79
   5   2   1  129.82   10.35
  -5   2  -1  124.56    5.50
  -6  -2  -1   16.58    1.26
  -6  -2  -1   14.90    1.49
  -6  -2  -1   12.53    2.37
   6  -2   1   16.36    0.89
   6  -2   1   13.84    1.12
  -6  -2  -1   15.35    3.15
   6  -2   1   17.40    1.37
  -6   2  -1   15.14    1.06
   6   2   1   16.04    1.15
   6   2   1   14.40    1.00
  -7  -2  -1   79.86    4.60
   7  -2   1   85.21    4.21
   7  -2   1   86.04    3.73
  -7  -2  -1   88.26    4.26
   7  -2   1   79.61    4.37
  -7   2  -1   84.77    4.14
   7   2   1   87.78    4.07
   7   2   1   87.61    3.90
   7   2   1   81.51    5.43
   8  -2   1   50.51    3.05
   8  -2   1   49.16    2.27
  -8  -2  -1   47.72    2.87
  -8  -2  -1   52.82    3.36
   8   2   1   56.05    4.22
   8   2   1   51.82    2.69
   8   2   1   47.22    2.51
  -8   2  -1   48.63    2.92
   9  -2   1   64.38    3.07
   9  -2   1   64.17    3.76
  -9  -2  -1   77.85    4.38
  -9  -2  -1   66.04    3.69
   9   2   1   66.52    5.01
  -9   2  -1   64.08    3.72
   9   2   1   68.56    3.38
   9   2   1   67.33    3.28
 -10  -2  -1  105.93    6.16
  10  -2   1  103.19    5.55
  10  -2   1  112.94    4.97
 -10  -2  -1  114.34    5.66
  10   2   1  113.43    5.14
  10   2   1  109.95    7.21
  10   2   1  114.55    5.14
 -10   2  -1  108.48    5.67
 -11  -2  -1   28.34    2.27
  11  -2   1   24.81    1.91
  11  -2   1   28.87    1.68
  11  -2   1   27.42    1.70
 -11  -2  -1   25.49    2.64
  11   2   1   28.67    1.67
 -11   2  -1   29.61    2.31
  11   2   1   24.60    3.18
  11   2   1   28.11    1.61
  11   2   1   31.02    1.84
  12  -2   1  162.77    7.10
  12  -2   1  158.97    6.80
 -12  -2  -1  169.76    8.80
  12  -2   1  167.21    7.14
 -12  -2  -1  151.97    7.90
  12   2   1  159.31    7.26
  12   2   1  131.59    9.49
  12   2   1  166.85    6.94
  12   2   1  147.03    8.59
 -12   2  -1  168.15    8.05
  13  -2   1   21.31    1.25
  13  -2   1   23.28    1.25
  13  -2   1   20.67    1.49
  13  -2   1   21.50    1.50
 -13  -2  -1   21.59    2.03
 -13  -2  -1   22.67    1.92
  13   2   1   21.35    2.80
 -13   2  -1   21.61    2.14
  13   2   1   23.11    1.87
  13   2   1   25.56    1.75
  13   2   1   22.03    2.02
  14  -2   1   47.43    2.28
 -14  -2  -1   53.12    3.05
 -14  -2  -1   52.10    3.03
  14  -2   1   51.09    2.76
  14  -2   1   51.31    2.74
  14  -2   1   51.90    3.73
  14   2   1   49.72    3.03
  14   2   1   48.99    3.04
  14   2   1   52.96    3.25
  14   2   1   49.75    2.98
 -14   2  -1   49.73    3.56
  14   2   1   51.16    3.03
  14   2   1   47.69    2.91
  14   2   1   47.62    3.02
 -15  -2  -1   16.51    1.69
 -15  -2  -1   16.58    1.69
  15  -2   1   17.13    1.35
  15  -2   1   15.67    2.12
  15  -2   1   16.69    1.35
  15   2   1   15.12    1.63
  15   2   1   16.79    1.57
  15   2   1   17.51    1.93
  15   2   1   18.02    1.75
  15   2   1   15.55    1.75
  15   2   1   16.43    1.71
  15   2   1   14.94    1.66
 -16  -2  -1   36.35    2.41
  16  -2   1   36.37    2.92
 -16  -2  -1   38.72    2.43
  16  -2   1   37.40    2.22
  16  -2   1   35.97    2.18
  16   2   1   34.47    2.44
  16   2   1   32.49    2.43
  16   2   1   39.83    2.34
  16   2   1   37.45    2.39
  16   2   1   36.94    2.42
  16   2   1   31.85    2.48
  17  -2   1    5.64    0.93
 -17  -2  -1    6.14    1.02
  17  -2   1    6.34    1.15
 -17  -2  -1    5.17    1.22
  17  -2   1    5.58    0.85
 -17  -2  -1    4.10    0.94
  17   2   1    5.33    0.97
  17   2   1    6.12    1.07
  17   2   1    7.19    1.07
  17   2   1    6.55    1.09
  17   2   1    7.01    0.84
  17   2   1    6.76    1.00
 -18  -2  -1    0.32    0.73
  18  -2   1    1.14    0.54
 -18  -2  -1    1.73    0.61
 -18  -2  -1    0.12    0.54
  18  -2   1    0.97    0.43
  18   2   1    0.35    0.56
  18   2   1    0.81    0.62
  18   2   1    1.05    0.55
  18   2   1    0.54    0.54
  18   2   1    0.59    0.50
  19  -2   1   37.42    3.14
 -19  -2  -1   30.45    1.89
 -19  -2  -1   32.26    1.94
  19  -2   1   31.38    1.92
  19   2   1   31.23    1.91
  19   2   1   31.26    1.82
  19   2   1   32.28    1.82
  19   2   1   31.83    1.94
 -19   2  -1   30.75    2.04
  19   2   1   29.61    1.52
 -20  -2  -1    2.24    0.47
 -20  -2  -1    0.82    0.45
  20  -2   1    1.85    0.46
  20  -2   1    2.26    0.60
 -20   2  -1    1.06    0.55
  20   2   1    2.41    0.52
  21  -2   1   33.58    1.69
 -21   2  -1   29.99    2.05
  21  -3  -1    1.80    0.42
  20  -3  -1   50.19    2.61
 -20  -3   1   50.53    2.88
 -20  -3   1   51.44    3.42
  20  -3  -1   54.84    2.59
  20   3  -1   46.65    2.58
  20   3  -1   51.17    2.62
 -20   3   1   52.74    2.63
  20   3  -1   51.75    2.47
 -19  -3   1    0.65    0.44
  19  -3  -1   -0.25    0.52
  19  -3  -1    0.14    0.41
 -19  -3   1    1.01    0.66
  19  -3  -1    0.51    0.35
  19   3  -1    0.65    0.64
  19   3  -1    0.94    0.57
  19   3  -1    0.97    0.66
 -19   3   1    1.15    0.58
  18  -3  -1   12.14    1.34
 -18  -3   1    9.75    1.04
 -18  -3   1    9.36    1.01
  18  -3  -1   11.11    1.03
 -18  -3   1    8.23    1.43
  18   3  -1   12.80    1.43
  18   3  -1   10.63    1.37
  18   3  -1   14.01    1.28
  18   3  -1   12.53    1.16
  18   3  -1    9.20    1.25
 -18   3   1   15.74    1.88
 -17  -3   1    1.59    0.65
 -17  -3   1    1.64    0.66
  17  -3  -1    0.96    0.73
  17  -3  -1    2.11    0.56
  17  -3  -1    1.24    0.64
 -17  -3   1    1.54    0.95
  17  -3  -1    0.97    0.95
  17   3  -1    1.17    0.91
  17   3  -1    1.38    0.74
  17   3  -1    1.97    0.92
  17   3  -1    1.42    0.81
  17   3  -1    1.58    0.72
  16  -3  -1   -0.19    0.84
  16  -3  -1    0.09    0.50
  16  -3  -1    0.18    0.79
 -16  -3   1    0.98    0.65
 -16  -3   1    1.52    0.98
  16  -3  -1    1.65    0.55
 -16  -3   1    0.72    0.63
  16   3  -1   -0.24    0.86
  16   3  -1    0.06    0.70
  16   3  -1    1.40    0.98
  16   3  -1    2.09    0.90
  16   3  -1   -0.04    0.78
 -15  -3   1   13.81    1.45
  15  -3  -1   14.12    1.29
  15  -3  -1   12.80    1.23
  15  -3  -1   14.71    2.11
 -15  -3   1   17.06    2.22
 -15  -3   1   13.76    1.47
  15   3  -1   13.87    1.61
  15   3  -1   13.90    0.95
  15   3  -1   13.76    1.87
  15   3  -1   16.27    2.02
  15   3  -1   11.58    1.67
  15   3  -1   14.33    1.50
  15   3  -1   13.70    1.72
  14  -3  -1   26.32    1.81
  14  -3  -1   23.92    1.29
  14  -3  -1   24.23    1.75
  14  -3  -1   27.23    2.99
 -14  -3   1   25.20    2.50
  14  -3  -1   23.01    1.22
 -14  -3   1   23.17    1.86
 -14  -3   1   27.10    1.97
  14   3  -1   23.96    1.60
 -14   3   1   22.51    2.56
  14   3  -1   25.01    1.80
  14   3  -1   27.61    2.48
  14   3  -1   25.97    1.91
  14   3  -1   25.39    1.93
  14   3  -1   25.80    2.27
  13  -3  -1   20.43    2.58
 -13  -3   1   15.95    2.50
  13  -3  -1   21.13    1.59
  13  -3  -1   20.53    1.19
  13  -3  -1   18.83    1.18
 -13  -3   1   18.82    1.68
  13  -3  -1   21.29    1.61
 -13  -3   1   19.20    1.75
  13   3  -1   21.36    2.29
  13   3  -1   18.55    1.75
 -13   3   1   24.64    2.52
  13   3  -1   21.59    1.77
  13   3  -1   23.62    1.60
 -12  -3   1  199.02    8.49
 -12  -3   1  164.02    7.87
  12  -3  -1  151.08    7.33
  12  -3  -1  152.50    6.89
  12  -3  -1  151.00    7.28
  12   3  -1  160.27    7.54
  12   3  -1  158.99    7.35
 -12   3   1  171.27    8.62
  11  -3  -1    3.92    1.01
  11  -3  -1    4.99    0.86
  11  -3  -1    5.11    0.73
  11   3  -1    4.09    0.92
 -11   3   1    3.20    1.08
  11   3  -1    5.10    0.86
  10  -3  -1  184.24    9.03
  10  -3  -1  173.02    8.24
 -10  -3   1  174.10    8.51
  10  -3  -1  183.44    7.99
  10  -3  -1  189.92    8.01
  10   3  -1  188.36    8.48
 -10   3   1  186.62    9.20
  -9  -3   1    2.14    0.69
   9  -3  -1    2.94    0.94
   9  -3  -1    2.52    0.49
   9  -3  -1    1.77    0.44
   9   3  -1    2.50    0.72
  -9   3   1    1.56    0.75
   8  -3  -1  232.97    9.92
   8  -3  -1  211.56   10.93
   8  -3  -1  224.98    9.75
  -8  -3   1  248.71   10.32
   8   3  -1  237.44   10.34
  -8   3   1  230.96   10.65
   7  -3  -1    1.47    0.43
   7  -3  -1    1.00    0.62
  -7  -3   1    1.14    0.50
   7  -3  -1    1.58    0.33
  -7  -3   1    1.55    1.63
   7   3  -1    1.10    0.51
  -7   3   1    1.75    0.65
   7   3  -1    1.02    0.47
   6  -3  -1  180.68    7.69
   6  -3  -1  173.05    8.61
  -6  -3   1  185.55    7.72
  -6  -3   1  173.68    7.87
  -6  -3   1  169.76    9.31
   6  -3  -1  174.65    7.81
  -6  -3   1  154.94   11.79
   6   3  -1  174.30    7.88
  -6   3   1  172.32    7.56
  -6   3   1  164.80    7.92
   6   3  -1  187.11    7.96
   5  -3  -1   26.52    2.37
  -5  -3   1   25.34    2.48
   5  -3  -1   18.83    2.00
  -5  -3   1   19.14    3.33
   5  -3  -1   23.42    2.09
  -5  -3   1   20.53    1.52
   5  -3  -1   24.44    1.54
   5   3  -1   21.57    1.61
   5   3  -1   23.33    1.73
  -5   3   1   25.15    1.65
  -5   3   1   23.20    1.36
  -4  -3   1    1.23    0.80
   4  -3  -1    1.26    0.57
   4  -3  -1    1.49    0.80
   4  -3  -1    1.37    0.72
   4  -3  -1    1.81    0.98
  -4  -3   1    2.31    0.56
  -4   3   1    1.31    0.47
   4   3  -1    1.72    0.55
  -4   3   1    1.36    0.37
   4   3  -1    4.57    0.80
   3  -3  -1   94.96    6.78
  -3  -3   1  102.58    5.69
   3  -3  -1   96.30    5.43
  -3  -3   1   82.32    6.77
   3  -3  -1   92.25    4.64
  -3  -3   1   97.71    4.54
  -3   3   1   99.21    4.61
   3   3  -1   98.79    4.72
  -3   3   1  103.56    4.46
   3   3  -1  104.85    4.78
   3   3  -1  100.26    8.35
  -2  -3   1   34.64    1.98
   2  -3  -1   38.59    2.15
  -2  -3   1   39.09    2.82
  -2  -3   1   31.23    3.58
   2  -3  -1   42.08    4.47
   2  -3  -1   36.78    2.79
  -2   3   1   41.41    2.15
   2   3  -1   35.60    2.11
  -2   3   1   37.07    2.02
  -2   3   1   41.32    5.45
   2   3  -1   32.02    4.36
   2   3  -1   36.00    2.15
   1  -3  -1  125.65    5.94
  -1  -3   1  109.81    7.64
   1  -3  -1  140.05    9.96
  -1  -3   1  134.43    6.72
  -1  -3   1  134.68    9.67
   1  -3  -1  142.65    7.00
  -1  -3   1  130.59    5.83
  -1   3   1  135.30   10.45
   1   3  -1  129.67    5.93
   1   3  -1  144.85    9.69
  -1   3   1  132.19    5.99
   1   3  -1  132.18    5.99
  -1   3   1  125.85    5.92
   0  -3   1   84.56    6.78
   0  -3  -1   85.39    7.93
   0  -3   1   67.62    5.02
   0  -3   1   74.21    3.59
   0  -3  -1   75.55    3.73
   0  -3  -1   71.22    4.57
   0  -3  -1   68.72    5.64
   0  -3   1   83.07    4.35
   0   3   1   81.39    3.81
   0   3  -1   80.53    3.68
   0   3   1   76.17    3.78
   0   3  -1   82.72    6.82
   0   3  -1   82.24    3.68
   0   3   1   71.78    3.67
   0   3   1   74.85    7.42
   1  -3   1    8.11    0.73
  -1  -3  -1    9.72    1.41
   1  -3   1   10.78    1.71
   1  -3   1    9.46    1.87
   1  -3   1    9.05    1.08
  -1  -3  -1    9.53    0.88
   1  -3   1    6.41    1.25
  -1  -3  -1    7.01    1.82
  -1   3  -1    8.88    0.68
   1   3   1    7.11    0.79
  -1   3  -1    9.94    2.36
   1   3   1    8.28    0.87
   1   3   1    8.66    2.73
   1   3   1    9.33    0.91
  -1   3  -1    8.36    0.74
   2  -3   1  201.34    9.65
  -2  -3  -1  217.36   12.24
   2  -3   1  174.26    9.18
   2  -3   1  189.71    9.09
   2  -3   1  198.96    8.62
   2  -3   1  196.00    9.96
  -2  -3  -1  214.76   10.13
  -2  -3  -1  196.50    8.75
   2   3   1  200.41    8.77
   2   3   1  213.70    8.90
   2   3   1  207.33   13.59
   2   3   1  190.31    8.86
  -2   3  -1  211.07    8.59
   3  -3   1   12.88    1.02
  -3  -3  -1   13.92    0.96
  -3  -3  -1   14.49    1.80
   3  -3   1   15.14    1.30
  -3  -3  -1   13.80    1.15
   3  -3   1   12.19    1.50
  -3  -3  -1   11.67    2.45
   3   3   1   15.42    3.38
   3   3   1   14.17    1.18
   3   3   1   13.98    1.24
  -3   3  -1   12.97    0.92
   3   3   1   13.56    1.11
   4  -3   1  281.59   11.23
   4  -3   1  251.79   11.38
   4  -3   1  245.47   10.73
  -4  -3  -1  259.51   10.87
  -4  -3  -1  260.60   12.68
  -4  -3  -1  234.18   10.96
  -4  -3  -1  255.07   15.13
   4   3   1  239.16   10.97
   4   3   1  254.69   16.42
  -4   3  -1  239.82   10.71
   4   3   1  257.62   11.24
   4   3   1  259.57   11.06
  -5  -3  -1   -0.14    0.61
   5  -3   1    0.21    0.30
   5  -3   1    0.41    0.25
   5  -3   1    0.17    0.36
  -5  -3  -1    0.01    0.31
  -5  -3  -1    0.57    1.18
   5   3   1   -0.16    0.31
   5   3   1    0.45    0.37
  -5   3  -1    0.44    0.25
  -6  -3  -1  487.23   27.44
   6  -3   1  544.30   21.24
  -6  -3  -1  488.30   21.66
   6  -3   1  581.77   21.69
   6   3   1  493.92   21.64
  -6   3  -1  482.91   21.51
   6   3   1  526.24   21.75
   7  -3   1    0.45    0.28
   7  -3   1    0.55    0.38
   7  -3   1    0.28    0.20
  -7  -3  -1    0.19    0.42
  -7   3  -1    0.35    0.38
   7   3   1   -0.05    0.35
  -8  -3  -1   89.56    4.66
   8  -3   1   94.72    4.00
   8  -3   1   86.22    4.00
  -8   3  -1   84.88    4.62
   8   3   1   93.17    6.66
   8   3   1   97.25    4.62
   9  -3   1   19.74    1.16
  -9  -3  -1   18.89    1.71
   9   3   1   22.35    1.65
  -9   3  -1   18.39    1.78
   9   3   1   19.06    2.93
  10  -3   1   17.93    1.35
  10  -3   1   20.72    1.30
 -10  -3  -1   19.35    1.84
  10   3   1   21.86    1.57
  10   3   1   23.55    1.68
  10   3   1   18.01    3.00
 -10   3  -1   21.37    1.92
 -11  -3  -1   31.62    2.58
  11  -3   1   33.73    1.98
  11  -3   1   31.39    1.91
  11   3   1   36.25    4.39
  11   3   1   32.52    2.14
  11   3   1   33.79    2.08
 -11   3  -1   37.38    2.73
 -12  -3  -1    0.12    0.74
 -12  -3  -1    0.99    0.74
  12  -3   1   -0.02    0.35
  12  -3   1   -0.17    0.35
  12   3   1    0.05    0.38
  12   3   1    0.17    0.37
 -12   3  -1    0.95    0.69
  13  -3   1   18.37    1.36
  13  -3   1   19.49    2.45
  13  -3   1   20.22    1.38
 -13  -3  -1   20.24    1.74
 -13  -3  -1   17.26    1.64
 -13  -3  -1   15.46    2.16
  13   3   1   18.58    1.66
  13   3   1   20.27    2.14
  13   3   1   19.41    1.95
  13   3   1   20.36    1.34
  13   3   1   22.48    2.27
  13   3   1   18.83    1.42
  13   3   1   18.69    2.05
 -13   3  -1   17.64    2.01
  13   3   1   18.65    1.70
 -14  -3  -1    2.44    0.81
  14  -3   1    2.64    1.21
  14  -3   1    2.80    0.59
 -14  -3  -1    2.68    0.82
  14  -3   1    4.07    0.76
 -14  -3  -1    3.71    1.31
  14   3   1    3.53    1.21
  14   3   1    3.87    1.31
  14   3   1    4.35    0.91
  14   3   1    1.83    0.89
  14   3   1    3.30    0.89
  14   3   1    2.28    0.98
 -14   3  -1    3.64    1.61
  15  -3   1    2.06    0.54
  15  -3   1    2.83    0.65
  15  -3   1    1.88    1.13
 -15  -3  -1    1.46    1.08
 -15  -3  -1    3.18    0.81
 -15  -3  -1    2.01    0.69
  15   3   1    1.50    0.89
  15   3   1    1.66    0.84
  15   3   1    1.14    0.73
  15   3   1    0.91    0.88
  15   3   1    2.74    1.08
  15   3   1    1.99    0.86
 -16  -3  -1   80.98    4.31
  16  -3   1   95.69    5.05
 -16  -3  -1   85.02    4.94
  16  -3   1   85.99    4.19
 -16  -3  -1   81.90    4.27
  16  -3   1   90.28    4.27
  16   3   1   89.96    4.40
  16   3   1   84.34    4.73
  16   3   1   85.06    4.48
  16   3   1   86.68    4.65
  16   3   1   89.50    4.60
  16   3   1   87.18    4.34
 -17  -3  -1    0.21    0.50
 -17  -3  -1    0.62    0.83
  17  -3   1    0.17    0.31
  17  -3   1    0.58    0.61
  17  -3   1   -0.56    0.75
 -17  -3  -1    0.97    0.56
  17   3   1   -0.04    0.68
  17   3   1    0.05    0.63
  17   3   1    0.61    0.61
  17   3   1    0.65    0.59
  17   3   1    0.77    0.62
  17   3   1   -0.17    0.72
 -18  -3  -1  102.22    4.74
  18  -3   1  103.83    4.71
  18  -3   1  100.32    4.82
 -18  -3  -1  103.62    4.75
  18   3   1  102.89    5.02
  18   3   1  103.82    4.98
  18   3   1  103.18    4.76
  18   3   1   99.78    5.01
  19  -3   1    0.44    0.27
 -19  -3  -1    0.13    0.40
  19  -3   1   -0.18    0.37
  19   3   1   -0.08    0.40
  19   3   1    0.03    0.35
  19   3   1    0.23    0.45
 -19   3  -1    0.31    0.57
  20  -3   1   65.38    2.98
  20  -3   1   61.21    3.01
 -20   3  -1   62.72    3.02
 -20  -4   1   20.77    1.66
  20  -4  -1   19.31    1.16
  20   4  -1   21.83    1.31
 -19  -4   1    3.11    0.80
 -19  -4   1    4.36    1.02
  19  -4  -1    3.16    0.46
  19  -4  -1    3.36    0.54
  19  -4  -1    4.26    0.66
  19   4  -1    3.13    0.73
  19   4  -1    3.56    0.74
  19   4  -1    5.68    0.85
 -19   4   1    5.67    0.69
 -18  -4   1   92.58    5.47
  18  -4  -1   97.86    4.45
  18  -4  -1   89.59    4.87
 -18  -4   1   93.05    4.95
  18  -4  -1   96.48    4.36
 -18  -4   1   95.55    5.03
  18   4  -1   89.50    4.72
  18   4  -1   97.49    4.55
  18   4  -1   90.98    4.89
 -17  -4   1    7.77    1.40
  17  -4  -1    7.29    0.97
 -17  -4   1    7.73    1.68
  17  -4  -1    6.41    1.20
 -17  -4   1    7.38    1.32
  17  -4  -1    5.68    0.79
  17   4  -1    6.52    1.32
  17   4  -1    6.20    1.10
  17   4  -1    6.10    1.23
  17   4  -1    6.50    1.27
  16  -4  -1   96.11    5.36
 -16  -4   1   90.27    5.88
  16  -4  -1   98.70    4.69
  16  -4  -1   97.44    4.79
 -16  -4   1   95.78    4.42
  16  -4  -1   96.25    4.59
 -16  -4   1   75.41    6.34
 -16  -4   1   99.99    5.45
  16   4  -1   96.58    5.07
  16   4  -1   92.19    5.29
  16   4  -1  103.75    5.39
  16   4  -1  104.88    5.33
  15  -4  -1    8.62    1.09
 -15  -4   1    8.88    2.02
  15  -4  -1    8.29    1.52
  15  -4  -1    7.62    0.99
 -15  -4   1    7.54    0.92
 -15  -4   1   10.61    1.78
  15   4  -1    8.38    0.83
  15   4  -1   12.33    1.99
  15   4  -1    7.43    1.41
  15   4  -1    7.14    0.76
 -14  -4   1   84.12    5.62
 -14  -4   1   85.14    5.15
  14  -4  -1   86.88    4.31
  14  -4  -1   83.96    4.32
  14  -4  -1   85.27    5.20
 -14  -4   1   89.74    4.19
  14   4  -1   84.18    4.82
  14   4  -1   87.84    4.57
  14   4  -1   88.53    4.17
  14   4  -1   86.78    4.29
  13  -4  -1    0.54    0.98
 -13  -4   1    1.30    0.96
 -13  -4   1    0.69    1.32
  13  -4  -1    0.43    0.38
 -13  -4   1    1.38    0.59
  13  -4  -1    1.07    0.57
  13   4  -1    1.09    0.68
 -13   4   1    0.29    0.74
  13   4  -1    0.48    0.65
  13   4  -1    0.53    0.48
  12  -4  -1   66.65    2.93
 -12  -4   1   64.86    5.85
  12  -4  -1   68.38    3.58
  12  -4  -1   64.13    4.35
 -12  -4   1   64.29    4.33
 -12  -4   1   66.10    3.40
  12  -4  -1   70.26    3.52
 -12  -4   1   74.98    3.85
 -12   4   1   66.70    4.58
  12   4  -1   69.63    3.48
  12   4  -1   68.71    4.13
  12   4  -1   69.33    3.72
  11  -4  -1    0.65    0.35
  11  -4  -1   -1.35    1.10
 -11  -4   1    0.26    0.83
  11  -4  -1    0.71    0.46
 -11  -4   1    0.18    0.85
 -11  -4   1    0.54    0.55
  11  -4  -1    2.35    0.57
  11  -4  -1    0.65    0.29
  11   4  -1    0.62    1.41
 -11   4   1    1.16    0.88
  11   4  -1   -0.04    0.79
  11   4  -1    0.40    0.55
  10  -4  -1   16.76    1.20
  10  -4  -1   16.05    1.11
  10  -4  -1   15.04    1.30
 -10  -4   1   18.05    2.04
 -10   4   1   15.52    1.86
  10   4  -1   14.35    1.64
  10   4  -1   15.51    1.51
   9  -4  -1   20.49    1.32
   9  -4  -1   19.65    1.49
   9  -4  -1   23.18    1.41
   9  -4  -1   18.35    1.75
  -9  -4   1   21.15    1.99
   9   4  -1   22.42    1.80
   9   4  -1   22.31    1.88
  -9   4   1   21.92    2.11
   8  -4  -1    9.39    0.77
   8  -4  -1    7.36    1.18
   8  -4  -1    8.67    0.84
   8  -4  -1    8.63    1.53
  -8   4   1    8.90    1.51
   8   4  -1    8.64    1.35
   7  -4  -1   49.53    3.47
   7  -4  -1   52.19    2.55
   7  -4  -1   53.32    2.78
   7   4  -1   55.34    3.22
  -7   4   1   55.57    3.30
   7   4  -1   53.09    3.22
   6  -4  -1  132.34    7.84
  -6  -4   1  164.81    9.36
   6  -4  -1  168.38    7.19
  -6  -4   1  157.52    7.50
  -6   4   1  162.77    7.61
  -6   4   1  160.60    7.27
   6   4  -1  157.49    7.51
   6   4  -1  167.96    7.65
  -5  -4   1    7.69    1.13
   5  -4  -1    6.83    1.22
  -5  -4   1    9.34    1.72
   5  -4  -1    8.14    1.05
   5   4  -1    9.08    1.19
  -5   4   1    6.75    0.88
   5   4  -1    7.93    1.11
  -5   4   1    7.24    1.03
  -4  -4   1  245.00   10.73
   4  -4  -1  258.94   10.82
   4  -4  -1  221.43   11.49
  -4  -4   1  268.39   12.56
  -4   4   1  232.44   10.78
   4   4  -1  241.88   10.97
  -4   4   1  238.64   10.63
   4   4  -1  236.58   10.96
   3  -4  -1    6.48    0.99
   3  -4  -1    4.40    1.33
  -3  -4   1    5.74    1.47
  -3  -4   1    6.18    0.90
   3  -4  -1    4.32    1.12
  -3  -4   1    5.36    2.12
  -3   4   1    5.21    0.90
  -3   4   1    5.06    0.80
   3   4  -1    5.19    0.96
   3   4  -1    6.11    1.10
  -2  -4   1  210.85    8.80
   2  -4  -1  203.81    8.90
  -2  -4   1  163.85    9.75
   2  -4  -1  213.60   10.07
  -2   4   1  185.95    8.80
   2   4  -1  207.61    9.10
  -2   4   1  202.11    8.94
   2   4  -1  187.76    8.90
  -1  -4   1   14.74    1.16
  -1  -4   1   16.00    1.81
  -1  -4   1    8.89    2.00
   1  -4  -1    9.41    2.05
   1  -4  -1   14.19    1.80
   1  -4  -1   12.58    1.19
   1   4  -1   11.45    1.14
  -1   4   1   13.00    1.25
   1   4  -1   12.92    1.31
  -1   4   1   13.94    1.27
   0  -4  -1  141.39    6.82
   0  -4   1  154.11    7.72
   0  -4   1  152.73    6.75
   0  -4  -1  150.89    8.11
   0   4  -1  141.45    6.79
   0   4  -1  145.07    6.92
   0   4   1  151.86    7.02
   0   4   1  142.92    6.93
   1  -4   1    2.37    1.09
  -1  -4  -1    1.47    1.16
   1  -4   1    3.30    0.93
  -1  -4  -1    2.33    1.04
  -1  -4  -1    2.90    0.70
   1  -4   1    4.07    0.71
  -1   4  -1    2.67    0.63
   1   4   1    2.49    0.71
  -1   4  -1    5.11    0.82
   1   4   1    3.79    0.86
  -2  -4  -1   68.84    4.77
   2  -4   1   58.06    3.72
  -2  -4  -1   58.06    5.99
   2  -4   1   52.07    3.59
   2  -4   1   68.22    3.29
  -2  -4  -1   74.30    3.55
   2   4   1   58.23    3.49
   2   4   1   69.47    3.61
  -2   4  -1   62.06    3.28
  -2   4  -1   70.83    3.32
  -3  -4  -1    9.68    1.13
   3  -4   1   10.17    1.23
  -3  -4  -1   12.68    2.01
   3  -4   1   10.97    1.03
  -3  -4  -1    9.79    2.67
   3   4   1   10.43    1.19
  -3   4  -1   11.40    1.05
   3   4   1   13.17    1.37
   3   4   1   10.14    1.18
   4  -4   1   87.91    4.25
  -4  -4  -1   72.53    4.00
   4  -4   1   78.90    3.74
  -4  -4  -1   80.33    5.72
  -4  -4  -1   60.54    7.06
  -4   4  -1   69.26    3.78
   4   4   1   78.17    4.05
   4   4   1   76.76    4.09
   5  -4   1   31.90    2.04
   5  -4   1   29.83    1.70
  -5  -4  -1   25.56    4.90
  -5  -4  -1   32.82    3.58
  -5   4  -1   28.36    1.92
   5   4   1   29.41    2.11
   5   4   1   27.65    2.05
   6  -4   1   75.69    3.64
   6  -4   1   77.29    3.43
  -6   4  -1   75.56    3.91
   6   4   1   78.18    4.09
   6   4   1   62.30    3.86
   7  -4   1   10.65    0.77
  -7   4  -1   11.98    1.25
   7   4   1   12.02    1.35
   8  -4   1  114.51    5.33
   8  -4   1  120.81    5.08
  -8   4  -1  114.50    5.92
   8   4   1  122.74    6.00
   9  -4   1    2.33    0.48
   9  -4   1    2.45    0.56
  -9   4  -1    1.94    0.78
   9   4   1    2.82    0.82
   9   4   1    2.09    0.73
  10  -4   1  114.03    5.12
  10  -4   1  108.59    5.21
  10   4   1  116.58    5.82
 -10   4  -1  109.31    6.03
  10   4   1  119.78    5.60
  11  -4   1    1.04    0.44
 -11  -4  -1    0.70    0.62
 -11  -4  -1    0.45    0.68
  11  -4   1    0.48    0.38
  11   4   1    0.64    0.70
  11   4   1    0.87    0.84
 -11   4  -1    1.05    0.71
  11   4   1    0.78    0.54
  12  -4   1  151.33    6.74
  12  -4   1  154.16    7.74
  12  -4   1  148.50    6.74
 -12  -4  -1  154.24    6.85
 -12  -4  -1  144.35    7.61
 -12  -4  -1  144.26    6.77
  12   4   1  142.91    6.89
  12   4   1  150.21    7.38
  12   4   1  157.04    6.89
  12   4   1  161.87    7.37
 -12   4  -1  136.37    7.57
  12   4   1  143.76    7.43
 -13  -4  -1    3.08    1.24
 -13  -4  -1    2.10    0.70
  13  -4   1    1.23    0.45
  13  -4   1    2.38    0.60
 -13  -4  -1    3.15    0.81
  13  -4   1    2.25    1.05
  13   4   1    3.16    0.66
  13   4   1    5.92    1.37
  13   4   1    2.08    0.70
  13   4   1    3.79    0.84
 -14  -4  -1  123.66    6.78
  14  -4   1  130.32    5.99
 -14  -4  -1  136.56    6.05
 -14  -4  -1  128.04    6.01
  14  -4   1  132.49    6.85
  14  -4   1  132.70    5.96
  14   4   1  145.26    7.04
  14   4   1  124.85    6.58
  14   4   1  131.42    6.87
  14   4   1  131.94    6.07
  14   4   1  125.78    5.75
 -15  -4  -1    4.21    1.23
 -15  -4  -1    4.38    0.80
  15  -4   1    3.35    0.67
  15  -4   1    4.28    1.19
  15  -4   1    3.78    0.63
 -15  -4  -1    3.79    0.74
  15   4   1    5.33    1.37
  15   4   1    4.56    0.83
  15   4   1    3.28    1.16
  15   4   1    4.81    1.26
  15   4   1    4.37    1.10
  16  -4   1   28.44    2.33
 -16  -4  -1   30.35    2.61
  16  -4   1   29.85    1.71
 -16  -4  -1   28.49    1.80
  16   4   1   27.22    2.17
  16   4   1   28.36    2.38
  16   4   1   28.63    1.78
  16   4   1   29.21    2.30
  16   4   1   27.78    2.48
  17  -4   1    3.10    0.70
 -17  -4  -1    3.18    1.37
 -17  -4  -1    2.03    0.49
  17  -4   1    2.63    0.47
  17  -4   1    1.68    0.81
  17   4   1    2.15    0.66
  17   4   1    0.87    0.85
  17   4   1    4.24    0.98
  17   4   1    1.83    0.80
 -18  -4  -1    1.40    0.90
  18  -4   1    0.42    0.23
  18  -4   1   -0.18    0.39
  18   4   1   -1.15    0.49
  18   4   1    0.53    0.62
  18   4   1    0.63    0.38
  18   4   1   -0.07    0.54
  19  -4   1    4.14    0.57
 -19  -4  -1    2.76    0.82
  19   4   1    3.80    0.67
  19   4   1    4.04    0.57
  19  -5  -1   16.48    1.02
  18  -5  -1   17.27    1.02
  18  -5  -1   16.58    1.13
  18  -5  -1   16.85    1.26
  18  -5  -1   16.19    1.39
 -18  -5   1   15.70    1.55
 -18  -5   1   16.25    1.49
  18   5  -1   19.85    1.72
 -18   5   1   17.95    1.26
  18   5  -1   17.51    1.29
  18   5  -1   16.53    1.54
 -17  -5   1   28.41    2.36
  17  -5  -1   29.46    2.04
  17  -5  -1   26.04    1.57
  17  -5  -1   30.11    1.75
 -17  -5   1   27.89    2.22
 -17  -5   1   27.41    2.08
  17   5  -1   27.75    2.05
  17   5  -1   30.75    2.32
  17   5  -1   28.96    2.37
  17   5  -1   27.36    2.27
  16  -5  -1    0.52    0.32
 -16  -5   1    1.03    0.85
  16  -5  -1   -0.30    0.59
  16  -5  -1    1.28    0.56
 -16  -5   1    0.87    0.69
 -16  -5   1    1.13    0.84
  16   5  -1    1.56    1.15
  16   5  -1   -0.46    0.68
  15  -5  -1   19.71    1.64
 -15  -5   1   22.57    2.37
  15  -5  -1   20.62    1.94
 -15  -5   1   21.82    2.19
  15  -5  -1   18.74    1.34
 -15  -5   1   21.73    1.98
  15   5  -1   18.09    1.24
  15   5  -1   16.04    1.16
  15   5  -1   22.02    2.18
 -14  -5   1   11.44    1.97
 -14  -5   1   10.31    1.55
  14  -5  -1   10.61    1.72
  14  -5  -1    7.32    0.94
 -14  -5   1    8.16    1.58
  14  -5  -1   10.58    1.07
  14   5  -1    8.84    1.09
  14   5  -1   12.16    1.82
  14   5  -1   10.18    1.27
 -13  -5   1   20.51    2.05
 -13  -5   1   19.02    2.32
  13  -5  -1   21.66    1.56
 -13  -5   1   22.72    2.60
  13  -5  -1   22.41    2.30
  13  -5  -1   22.27    1.60
  13  -5  -1   19.71    2.25
  13   5  -1   20.66    1.96
  13   5  -1   24.60    2.16
  13   5  -1   21.46    1.73
 -12  -5   1   24.16    2.46
  12  -5  -1   23.49    2.38
 -12  -5   1   22.26    2.66
 -12  -5   1   22.44    2.17
  12  -5  -1   22.42    2.60
  12  -5  -1   23.30    1.60
  12  -5  -1   23.99    1.66
  12   5  -1   23.56    2.11
  12   5  -1   20.89    1.81
  12   5  -1   21.07    2.10
 -11  -5   1   18.96    2.31
  11  -5  -1   20.64    2.29
  11  -5  -1   20.18    1.54
  11  -5  -1   19.73    1.47
  11  -5  -1   19.90    2.22
 -11  -5   1   19.24    2.54
 -11  -5   1   18.74    1.97
  11   5  -1   22.95    1.88
  11   5  -1   21.26    2.07
 -11   5   1   19.10    2.32
  11   5  -1   24.26    2.30
  10  -5  -1   49.75    2.41
 -10  -5   1   47.90    3.26
 -10  -5   1   50.88    3.72
 -10  -5   1   51.23    3.92
  10  -5  -1   48.73    3.50
  10  -5  -1   46.35    2.74
  10  -5  -1   51.56    2.69
  10  -5  -1   54.62    3.51
 -10   5   1   45.90    3.59
  10   5  -1   50.36    3.29
  10   5  -1   49.57    3.15
  10   5  -1   49.76    3.62
   9  -5  -1    0.46    0.38
   9  -5  -1    0.40    0.40
  -9  -5   1    0.27    0.68
   9  -5  -1    0.67    0.88
   9  -5  -1    0.36    0.30
   9  -5  -1    0.29    0.32
  -9  -5   1   -0.60    1.02
   9   5  -1    0.80    0.65
   9   5  -1    0.83    0.78
  -9   5   1    0.46    0.72
   9   5  -1    0.19    0.77
   8  -5  -1  137.88    6.24
   8  -5  -1  163.60    8.86
   8  -5  -1  133.97    6.39
  -8  -5   1  134.57    6.82
   8  -5  -1  136.72    6.05
  -8  -5   1  137.66    7.20
   8  -5  -1  146.32    6.30
   8   5  -1  144.91    7.27
  -8   5   1  135.34    7.29
   7  -5  -1   45.73    2.41
   7  -5  -1   43.59    2.21
   7  -5  -1   39.50    2.20
  -7  -5   1   40.45    2.74
   7  -5  -1   42.25    2.39
  -7   5   1   40.12    2.96
  -7   5   1   43.44    2.94
  -6  -5   1  128.51    6.07
  -6  -5   1  128.18    8.57
   6  -5  -1  129.93    5.89
   6  -5  -1  120.49    6.67
   6  -5  -1  121.93    5.72
  -6   5   1  115.18    6.25
   6   5  -1  125.85    6.56
  -6   5   1  132.88    6.60
  -5  -5   1   45.61    3.07
   5  -5  -1   46.64    2.56
  -5  -5   1   44.40    4.33
   5  -5  -1   51.25    2.85
   5  -5  -1   51.62    3.61
  -5   5   1   44.62    3.03
   5   5  -1   47.98    3.29
  -5   5   1   53.72    3.31
  -4  -5   1   25.29    2.99
  -4  -5   1   27.00    2.07
   4  -5  -1   30.11    2.09
  -4   5   1   23.90    2.11
   4   5  -1   29.41    2.41
  -4   5   1   26.64    2.09
   4   5  -1   25.73    2.26
  -3  -5   1   33.32    2.28
  -3  -5   1   33.11    3.32
   3  -5  -1   31.77    2.23
   3  -5  -1   26.02    2.65
  -3   5   1   35.34    2.43
  -3   5   1   30.47    2.33
   3   5  -1   29.71    2.38
   3   5  -1   30.11    2.52
   2  -5  -1    1.62    0.95
   2  -5  -1    1.20    0.58
  -2  -5   1    0.81    0.79
  -2  -5   1    0.76    0.53
  -2   5   1   -0.05    0.44
   2   5  -1    1.22    0.62
   2   5  -1    0.71    0.66
  -2   5   1    0.82    0.57
  -1  -5   1   14.22    1.39
   1  -5  -1   14.46    1.49
  -1  -5   1   15.39    2.04
   1  -5  -1   14.18    2.05
   1   5  -1   13.63    1.47
  -1   5   1   14.16    1.55
   1   5  -1   16.64    1.70
  -1   5   1   14.19    1.52
   0  -5   1   36.15    2.35
   0  -5  -1   38.31    2.51
   0  -5   1   33.34    3.06
   0  -5  -1   39.71    3.57
   0   5  -1   37.21    2.67
   0   5   1   35.86    2.65
   0   5  -1   34.85    2.48
   0   5   1   32.51    2.51
  -1  -5  -1   60.80    4.74
  -1  -5  -1   62.17    3.48
   1  -5   1   57.72    3.24
   1  -5   1   47.97    3.81
   1   5   1   64.41    3.70
  -1   5  -1   50.19    3.42
  -1   5  -1   61.17    3.48
   1   5   1   59.37    3.64
   2  -5   1   52.66    3.48
  -2  -5  -1   41.94    2.84
   2  -5   1   41.58    2.63
  -2  -5  -1   49.62    4.31
   2   5   1   42.78    3.01
  -2   5  -1   39.03    2.73
  -2   5  -1   42.66    2.89
   2   5   1   42.67    3.01
  -3  -5  -1   35.77    2.60
   3  -5   1   39.53    2.36
  -3  -5  -1   36.80    3.92
   3  -5   1   42.42    2.95
  -3   5  -1   35.13    2.52
  -3   5  -1   34.89    2.48
   3   5   1   38.43    2.76
  -4  -5  -1  197.93    9.25
   4  -5   1  183.19    9.14
  -4  -5  -1  182.35   11.31
   4  -5   1  200.89    8.65
   4  -5   1  199.12    8.43
  -4   5  -1  193.39    9.03
   4   5   1  197.49    9.29
   5  -5   1    0.67    0.39
   5  -5   1    1.33    0.41
   5  -5   1    0.52    0.46
  -5   5  -1    1.23    0.50
   5   5   1    0.54    0.68
   6  -5   1  119.29    5.37
   6  -5   1  121.11    5.29
   6   5   1  121.68    6.25
  -6   5  -1  111.24    6.01
  -7  -5  -1   19.42    1.94
   7  -5   1   22.10    1.43
   7  -5   1   22.50    1.19
  -7   5  -1   17.84    1.82
   7   5   1   20.42    2.00
   8  -5   1   40.07    2.30
   8  -5   1   41.25    3.01
  -8  -5  -1   39.47    2.95
   8  -5   1   41.66    2.18
  -8   5  -1   46.67    3.01
   8   5   1   41.82    2.89
   8   5   1   39.83    2.99
   8   5   1   43.58    2.83
  -9  -5  -1   50.83    4.04
   9  -5   1   50.97    3.62
   9  -5   1   53.61    2.82
   9  -5   1   53.42    3.69
  -9  -5  -1   52.29    3.50
   9  -5   1   53.63    2.71
   9   5   1   56.74    3.46
  -9   5  -1   50.92    3.50
   9   5   1   55.84    3.28
   9   5   1   54.87    3.77
 -10  -5  -1   27.70    1.88
  10  -5   1   27.47    2.51
  10  -5   1   27.62    1.71
  10  -5   1   28.96    2.51
 -10  -5  -1   25.95    2.41
  10  -5   1   24.45    1.60
 -10  -5  -1   29.16    2.98
 -10  -5  -1   23.48    2.54
  10   5   1   27.31    2.47
 -10   5  -1   23.70    2.35
  10   5   1   26.95    2.08
  10   5   1   28.95    2.31
  11  -5   1   27.96    1.74
  11  -5   1   28.62    1.75
  11  -5   1   28.51    2.54
 -11  -5  -1   29.44    1.73
 -11  -5  -1   28.52    3.05
 -11  -5  -1   21.80    2.63
  11  -5   1   30.60    2.62
 -11  -5  -1   25.35    2.42
  11   5   1   27.03    2.31
  11   5   1   26.70    2.37
  11   5   1   30.13    2.11
 -12  -5  -1    0.33    1.03
 -12  -5  -1    0.18    1.08
  12  -5   1    0.19    0.71
 -12  -5  -1    0.69    0.87
  12  -5   1   -0.01    0.29
  12  -5   1    0.45    0.42
  12   5   1    0.17    0.61
  12   5   1   -0.27    0.44
  12   5   1    0.00    0.81
  13  -5   1   34.64    2.02
  13  -5   1   39.68    2.82
  13  -5   1   34.17    1.96
 -13  -5  -1   30.42    2.86
 -13  -5  -1   31.99    2.74
 -13  -5  -1   32.91    3.16
  13   5   1   32.03    2.86
  13   5   1   34.48    2.33
  13   5   1   34.28    2.58
  13   5   1   33.89    2.12
  14  -5   1   19.85    1.94
 -14  -5  -1   21.05    2.40
 -14  -5  -1   19.08    2.29
  14  -5   1   18.20    1.23
 -14  -5  -1   16.23    1.99
  14  -5   1   18.70    1.33
  14   5   1   16.63    1.17
  14   5   1   17.91    2.12
 -15  -5  -1   46.20    3.08
 -15  -5  -1   48.21    3.55
  15  -5   1   44.52    2.98
  15  -5   1   43.66    2.29
  15   5   1   44.65    3.34
  15   5   1   42.84    2.96
  16  -5   1   60.66    2.98
  16  -5   1   67.78    3.64
 -16  -5  -1   62.16    4.08
  16   5   1   64.78    3.87
  16   5   1   66.85    3.80
  16   5   1   65.19    3.77
  16   5   1   62.99    3.52
  17  -5   1    7.35    0.99
  17  -5   1    7.61    0.83
  17  -5   1    6.98    0.57
 -17  -5  -1    5.38    1.08
  17   5   1    2.63    0.94
  17   5   1    7.47    0.90
  17   5   1    6.57    1.07
 -18  -5  -1   51.17    3.09
  18  -5   1   57.21    2.59
  18   5   1   54.09    3.02
  18   5   1   53.24    2.83
  17  -6  -1    0.94    0.42
  17  -6  -1    0.52    0.31
  17  -6  -1    0.77    0.44
  17   6  -1    0.77    0.48
  17   6  -1    1.39    0.72
 -16  -6   1   18.81    1.77
  16  -6  -1   21.10    1.64
 -16  -6   1   21.33    1.51
  16  -6  -1   23.08    1.40
  16  -6  -1   20.21    1.20
  16   6  -1   22.94    2.16
  16   6  -1   23.22    1.81
 -15  -6   1    4.08    0.88
 -15  -6   1    3.82    1.02
  15  -6  -1    4.42    0.89
  15  -6  -1    4.84    0.79
  15  -6  -1    5.15    0.63
  15   6  -1    4.34    1.16
  15   6  -1    4.09    0.44
  14  -6  -1   18.65    1.47
  14  -6  -1   19.16    1.83
 -14  -6   1   18.41    1.85
 -14  -6   1   22.39    2.12
  14  -6  -1   17.72    1.26
  14   6  -1   20.41    1.86
  14   6  -1   17.30    1.47
  14   6  -1   19.35    2.21
  14   6  -1   19.33    1.39
 -13  -6   1   16.50    1.89
  13  -6  -1   16.57    1.81
  13  -6  -1   19.26    1.53
  13  -6  -1   15.66    1.84
 -13  -6   1   14.97    1.98
  13  -6  -1   18.64    1.31
  13   6  -1   17.47    1.71
  13   6  -1   18.03    1.50
  13   6  -1   19.57    1.90
 -12  -6   1    0.72    0.80
  12  -6  -1    0.54    0.76
 -12  -6   1    0.65    0.92
  12  -6  -1    1.49    0.82
  12  -6  -1    0.42    0.50
  12  -6  -1    0.37    0.34
  12   6  -1    0.39    0.69
  12   6  -1    0.64    0.55
  12   6  -1    0.34    0.69
  11  -6  -1   50.10    3.57
  11  -6  -1   55.15    2.91
  11  -6  -1   56.84    3.63
 -11  -6   1   51.32    3.57
 -11  -6   1   43.42    3.65
  11  -6  -1   52.81    2.85
  11   6  -1   56.97    3.73
  11   6  -1   49.78    3.31
  11   6  -1   52.48    3.24
  10  -6  -1    0.32    0.43
 -10  -6   1   -0.73    0.89
  10  -6  -1    1.62    0.85
  10  -6  -1    1.90    0.86
 -10  -6   1   -0.10    0.74
  10  -6  -1    1.66    0.57
  10   6  -1    0.46    0.60
  10   6  -1   -0.74    0.69
  10   6  -1    1.16    0.95
   9  -6  -1   85.99    5.09
   9  -6  -1   90.50    4.25
  -9  -6   1   86.52    5.25
  -9  -6   1   85.92    5.41
   9  -6  -1   89.78    5.06
   9  -6  -1   82.40    3.97
  -9  -6   1   91.18    5.01
  -9  -6   1   81.50    4.10
   9  -6  -1   87.43    4.36
   9   6  -1   90.95    5.44
   9   6  -1   93.21    4.90
   8  -6  -1    2.89    0.71
  -8  -6   1    3.47    1.41
  -8  -6   1    2.11    0.90
   8  -6  -1    2.98    0.55
   8  -6  -1    1.33    0.88
   8  -6  -1    4.67    1.42
  -8  -6   1    7.19    1.74
   8  -6  -1    3.09    0.64
   8  -6  -1    3.24    0.35
  -8  -6   1    2.89    0.69
  -8   6   1    2.83    1.08
   8   6  -1    2.35    0.66
   8   6  -1    3.60    1.05
   7  -6  -1   98.88    5.22
  -7  -6   1   85.89    5.35
   7  -6  -1   92.42    4.31
  -7  -6   1   79.98    5.12
   7  -6  -1   93.44    5.30
   7  -6  -1   86.91    4.00
  -7  -6   1   91.45    4.81
  -7  -6   1   89.93    4.34
   7  -6  -1   86.78    4.42
   7  -6  -1   90.61    4.29
   7   6  -1   90.90    4.89
  -7   6   1   81.15    5.26
   7   6  -1   95.30    4.32
   6  -6  -1   34.99    1.99
  -6  -6   1   36.22    3.02
  -6  -6   1   39.10    2.65
   6  -6  -1   35.10    2.19
   6  -6  -1   34.25    2.20
  -6  -6   1   39.68    3.06
  -6  -6   1   31.66    3.05
   6  -6  -1   37.73    2.09
   6  -6  -1   35.71    3.07
  -6  -6   1   35.64    2.22
   6  -6  -1   35.62    2.79
  -6  -6   1   36.82    2.41
  -6   6   1   37.98    2.99
   6   6  -1   38.55    2.63
   6   6  -1   35.09    2.17
  -5  -6   1   77.80    4.51
  -5  -6   1   79.32    3.92
  -5  -6   1   82.98    4.80
   5  -6  -1   81.29    3.99
  -5  -6   1   69.08    4.50
  -5  -6   1   82.28    4.40
   5  -6  -1   80.81    4.56
   5  -6  -1   80.79    4.15
   5  -6  -1   78.17    3.83
   5  -6  -1   80.37    3.83
  -5   6   1   76.33    4.81
   5   6  -1   77.07    4.38
   5   6  -1   77.57    3.91
  -4  -6   1   62.67    3.90
   4  -6  -1   68.03    3.59
  -4  -6   1   67.84    4.14
  -4  -6   1   73.70    4.35
   4  -6  -1   70.96    4.15
   4  -6  -1   69.18    3.87
   4  -6  -1   71.21    3.63
   4   6  -1   71.12    3.58
  -4   6   1   74.58    4.54
  -3  -6   1    2.60    0.86
  -3  -6   1    0.89    0.60
   3  -6  -1    1.75    0.80
   3  -6  -1    2.78    0.67
   3  -6  -1    1.60    0.81
  -3  -6   1    0.58    0.89
   3  -6  -1    3.53    1.07
  -3   6   1    1.83    0.93
   3   6  -1    1.85    1.17
  -3   6   1    2.37    0.94
   3   6  -1    2.34    1.08
  -2  -6   1   24.19    2.09
   2  -6  -1   23.04    2.03
   2  -6  -1   24.42    2.06
  -2  -6   1   24.26    1.73
   2  -6  -1   23.37    1.65
  -2  -6   1   23.47    2.12
   2   6  -1   25.77    2.40
  -2   6   1   23.17    2.29
   2   6  -1   24.43    2.55
  -2   6   1   24.87    2.39
  -1  -6   1   17.83    1.77
  -1  -6   1   18.32    1.76
   1  -6  -1   19.49    1.48
   1  -6  -1   20.89    2.13
   1  -6  -1   19.58    1.90
  -1  -6   1   16.65    1.38
   1   6  -1   19.33    2.23
  -1   6   1   18.02    2.01
  -1   6   1   17.19    2.00
   1   6  -1   18.44    2.00
   0  -6  -1   38.92    2.89
   0  -6   1   42.09    2.38
   0  -6  -1   40.77    2.45
   0  -6  -1   40.24    2.86
   0  -6   1   42.62    2.83
   0  -6   1   39.69    2.68
   0   6  -1   40.52    3.07
   0   6  -1   41.83    3.27
   0   6   1   42.14    3.22
   0   6   1   41.75    3.19
  -1  -6  -1   27.31    2.39
   1  -6   1   28.77    1.86
   1  -6   1   29.46    2.18
  -1  -6  -1   28.72    2.40
   1  -6   1   35.13    2.37
  -1  -6  -1   29.24    2.01
  -1   6  -1   28.99    2.73
  -1   6  -1   30.61    2.53
   1   6   1   29.42    2.62
   1   6   1   29.81    2.69
   2  -6   1   13.26    1.44
   2  -6   1   12.35    1.11
  -2  -6  -1   11.06    1.82
   2  -6   1   12.21    1.36
  -2  -6  -1   13.38    1.89
  -2   6  -1   14.32    1.89
  -2   6  -1   11.07    1.52
   2   6   1   13.94    1.89
   3  -6   1  139.62    6.43
   3  -6   1  146.80    6.77
  -3  -6  -1  148.25    7.21
   3  -6   1  150.77    7.20
   3  -6   1  146.34    6.42
  -3  -6  -1  146.71    7.37
   3   6   1  140.71    7.27
   3   6   1  121.98    8.01
  -3   6  -1  148.34    7.37
   3   6   1  143.28    6.44
  -3   6  -1  128.63    7.32
  -4  -6  -1    1.28    1.09
  -4  -6  -1    2.66    1.62
  -4  -6  -1    4.44    1.38
   4  -6   1    1.96    0.57
   4  -6   1    1.32    0.84
   4  -6   1    2.51    0.53
   4  -6   1    2.78    0.61
  -4   6  -1    2.68    0.93
  -4   6  -1    1.97    1.18
   4   6   1    1.72    0.64
   4   6   1    1.86    0.79
   5  -6   1  118.16    5.54
   5  -6   1  141.91    8.35
   5  -6   1  118.87    5.45
  -5  -6  -1  125.56    6.12
  -5  -6  -1  112.31    6.44
   5  -6   1  118.42    6.22
   5  -6   1  119.16    5.17
  -5   6  -1  109.94    6.34
   5   6   1  125.24    5.55
   5   6   1  120.58    6.06
   6  -6   1    7.84    1.48
  -6  -6  -1    8.55    1.90
   6  -6   1   10.34    1.74
  -6  -6  -1    6.71    1.30
   6  -6   1    9.61    0.95
   6  -6   1   10.53    0.79
  -6  -6  -1    9.27    1.08
  -6  -6  -1    9.31    1.95
   6   6   1    9.91    1.13
   6   6   1   12.44    1.61
  -6   6  -1    7.28    1.42
   7  -6   1   81.48    3.94
  -7  -6  -1   79.55    4.72
   7  -6   1   83.03    4.69
  -7  -6  -1   72.54    4.98
  -7  -6  -1   77.86    3.81
   7  -6   1   77.17    3.77
   7  -6   1   81.51    4.88
   7   6   1   77.37    3.78
  -7   6  -1   77.79    4.70
   7   6   1   82.88    4.47
   8  -6   1   14.49    1.96
   8  -6   1   15.29    1.14
  -8  -6  -1   10.75    2.06
   8  -6   1   15.16    2.08
   8  -6   1   13.04    1.16
  -8  -6  -1   14.74    1.92
   8   6   1   14.65    1.81
   8   6   1   14.75    2.19
   8   6   1   16.65    1.93
  -8   6  -1   11.16    1.88
   9  -6   1   31.33    1.87
  -9  -6  -1   32.19    2.78
   9  -6   1   29.15    2.60
   9  -6   1   32.18    2.62
  -9  -6  -1   32.30    2.99
   9  -6   1   27.77    1.89
   9   6   1   34.13    2.50
   9   6   1   35.30    2.91
   9   6   1   32.34    2.44
 -10  -6  -1   19.94    2.21
  10  -6   1   18.59    1.97
  10  -6   1   22.62    2.09
  10  -6   1   19.47    1.38
  10  -6   1   19.56    1.41
 -10  -6  -1   15.73    2.13
  10   6   1   20.14    1.79
  10   6   1   22.30    2.00
  10   6   1   21.14    2.20
  11  -6   1    1.11    0.88
 -11  -6  -1    1.52    1.07
  11  -6   1    0.75    0.79
  11  -6   1    1.68    0.46
 -11  -6  -1    1.51    0.90
  11  -6   1    3.92    0.61
  11   6   1    1.83    0.86
  11   6   1    1.83    0.87
  11   6   1    1.26    0.63
 -12  -6  -1    8.81    1.60
  12  -6   1    9.35    0.93
  12  -6   1    8.19    1.31
  12  -6   1    5.98    1.28
  12  -6   1    7.93    0.81
 -12  -6  -1   10.02    1.72
  12   6   1   10.59    1.46
  12   6   1    9.43    1.35
  12   6   1    9.61    1.17
 -13  -6  -1    9.84    2.17
  13  -6   1    6.43    1.09
 -13  -6  -1    7.44    1.40
  13  -6   1    7.47    0.74
  13   6   1    8.17    1.30
  13   6   1    7.61    0.91
  13   6   1    7.97    1.00
  13   6   1    9.52    1.66
 -14  -6  -1   13.02    1.59
  14  -6   1   12.09    0.87
  14  -6   1   13.59    1.41
  14   6   1   11.15    1.39
  14   6   1   12.05    0.76
  14   6   1   11.01    1.52
  15  -6   1   30.70    1.76
  15  -6   1   29.22    2.02
 -15  -6  -1   29.42    2.15
  15  -6   1   26.69    1.45
  15   6   1   32.01    2.56
  15   6   1   26.78    2.10
  16  -6   1    9.32    0.98
 -16  -6  -1   10.07    1.06
  16  -6   1    7.69    0.79
  16   6   1    7.80    0.99
  16   6   1    7.68    1.22
  17  -6   1   66.88    3.14
  17  -6   1   62.33    3.16
  17   6   1   65.38    2.92
  17   6   1   67.34    3.33
  15  -7  -1   46.15    2.20
  15  -7  -1   45.80    2.45
  15  -7  -1   43.73    2.14
 -15  -7   1   38.20    2.56
  15   7  -1   42.04    2.56
  14  -7  -1    0.78    0.30
  14  -7  -1    1.69    0.64
  14  -7  -1    1.06    0.41
 -14  -7   1    1.68    0.88
  14  -7  -1    0.89    0.49
 -14  -7   1    1.90    0.67
  14   7  -1    1.27    0.62
  14   7  -1    1.07    0.82
  14   7  -1    0.35    0.30
 -13  -7   1   47.69    3.16
  13  -7  -1   46.08    2.38
  13  -7  -1   47.60    2.87
  13  -7  -1   50.09    2.93
  13  -7  -1   49.66    2.51
  13   7  -1   45.34    2.67
  13   7  -1   45.40    2.53
  13   7  -1   47.67    2.90
  12  -7  -1    0.60    0.41
  12  -7  -1   -0.23    0.56
  12  -7  -1   -0.21    0.27
  12  -7  -1    0.12    0.54
 -12  -7   1    2.37    0.95
 -12  -7   1   -0.18    0.67
  12   7  -1    0.12    0.49
  12   7  -1   -0.16    0.56
  12   7  -1   -0.19    0.50
  11  -7  -1   12.93    1.62
  11  -7  -1   11.26    1.19
 -11  -7   1   16.41    2.11
  11  -7  -1   12.30    1.06
 -11  -7   1   11.77    1.67
  11  -7  -1   11.98    1.62
  11   7  -1   12.41    1.61
  11   7  -1   13.76    1.65
  11   7  -1   11.59    1.38
 -10  -7   1    1.87    0.97
  10  -7  -1    0.55    0.37
  10  -7  -1    0.51    0.77
  10  -7  -1    1.34    0.74
 -10  -7   1    1.61    1.08
  10  -7  -1    0.24    0.43
  10   7  -1    0.51    0.82
  10   7  -1    1.14    0.72
  10   7  -1    1.47    0.70
  -9  -7   1    1.46    1.01
   9  -7  -1    0.97    0.77
   9  -7  -1   -0.10    0.43
   9  -7  -1    0.67    0.41
   9  -7  -1    0.07    0.69
  -9  -7   1   -0.01    0.99
   9   7  -1    0.34    0.83
   9   7  -1    0.19    0.64
   9   7  -1    0.29    0.70
  -8  -7   1    4.19    1.36
   8  -7  -1    5.41    1.19
  -8  -7   1    4.80    0.76
  -8  -7   1    6.10    1.51
   8  -7  -1    4.67    1.10
  -8  -7   1    5.87    1.55
   8  -7  -1    4.95    0.83
   8  -7  -1    4.98    0.85
   8   7  -1    5.22    1.17
   8   7  -1    4.91    0.75
  -7  -7   1   18.38    1.48
   7  -7  -1   19.27    1.43
   7  -7  -1   18.64    1.50
  -7  -7   1   23.78    2.32
   7  -7  -1   20.00    2.02
  -7  -7   1   21.53    2.40
   7  -7  -1   19.75    2.16
  -7  -7   1   15.11    2.09
   7   7  -1   20.72    1.49
   7   7  -1   20.07    1.91
   6  -7  -1    0.45    0.47
   6  -7  -1    1.61    0.87
   6  -7  -1    1.00    0.48
  -6  -7   1    2.01    1.10
   6  -7  -1    1.73    0.31
   6  -7  -1    1.27    0.98
  -6  -7   1    1.29    0.59
  -6  -7   1    2.19    1.05
  -6  -7   1    0.24    0.95
   6   7  -1    1.20    0.84
   6   7  -1    1.47    0.61
   5  -7  -1   90.79    4.60
   5  -7  -1   91.30    4.74
   5  -7  -1   98.90    4.36
   5  -7  -1   99.49    5.53
  -5  -7   1   97.68    5.81
  -5  -7   1   98.45    5.30
  -5  -7   1   92.81    5.26
   5  -7  -1   94.16    5.30
  -5  -7   1   97.21    4.65
   5   7  -1   95.99    5.14
   5   7  -1   99.64    4.64
  -4  -7   1    1.37    0.74
   4  -7  -1    2.31    0.65
  -4  -7   1    4.35    1.29
   4  -7  -1    1.73    0.92
   4  -7  -1    2.35    0.57
  -4  -7   1    1.22    0.94
   4  -7  -1    2.53    1.07
   4  -7  -1    2.35    0.81
  -4  -7   1    3.63    1.31
   4  -7  -1    2.30    0.58
  -4  -7   1    1.56    0.93
   4   7  -1    3.05    0.90
   4   7  -1    2.15    0.64
   3  -7  -1  136.68    6.29
  -3  -7   1  129.20    6.30
  -3  -7   1  137.90    6.63
  -3  -7   1  141.28    6.81
   3  -7  -1  140.22    6.70
   3  -7  -1  134.25    7.18
  -3  -7   1  135.54    7.11
   3  -7  -1  147.41    7.04
   3  -7  -1  136.54    6.43
  -3  -7   1  137.71    7.45
   3  -7  -1  137.91    6.27
   3   7  -1  131.11    6.28
   3   7  -1  127.24    6.69
   2  -7  -1    1.66    1.10
  -2  -7   1    0.03    0.77
   2  -7  -1   -0.34    0.42
  -2  -7   1   -0.39    0.49
  -2  -7   1    0.00    0.68
   2  -7  -1    0.25    0.42
  -2  -7   1   -1.13    0.71
   2  -7  -1    0.83    0.79
  -2  -7   1    0.78    0.73
   2  -7  -1   -0.22    0.60
  -2  -7   1   -0.13    0.70
  -2  -7   1   -0.67    1.02
   2  -7  -1    0.66    0.71
  -2  -7   1    0.91    0.91
   2   7  -1   -0.55    0.52
  -2   7   1   -0.03    0.63
   2   7  -1    0.18    0.75
  -2   7   1    0.01    0.90
  -1  -7   1   76.42    4.26
  -1  -7   1   74.30    4.16
  -1  -7   1   78.39    3.78
   1  -7  -1   82.75    4.23
  -1  -7   1   73.34    3.97
   1  -7  -1   75.84    4.71
   1  -7  -1   73.05    3.81
  -1  -7   1   76.40    4.47
  -1  -7   1   77.29    4.88
   1  -7  -1   75.96    4.50
   1  -7  -1   81.59    4.07
   1  -7  -1   74.87    3.94
  -1  -7   1   75.82    4.40
  -1  -7   1   82.91    4.05
   1  -7  -1   73.88    4.38
   1   7  -1   71.10    3.88
  -1   7   1   76.99    5.15
   1   7  -1   68.71    4.93
   1   7  -1   77.56    4.29
  -1   7   1   78.39    3.93
   0  -7   1    4.66    0.89
   0  -7  -1    5.54    1.27
   0  -7  -1    6.38    1.04
   0  -7   1    4.85    1.14
   0  -7  -1    4.19    1.49
   0  -7  -1    3.04    1.00
   0  -7  -1    2.80    0.72
   0  -7   1    4.27    1.07
   0  -7  -1    4.54    0.94
   0  -7  -1    2.50    1.06
   0  -7   1    4.81    1.35
   0  -7  -1    3.10    0.87
   0  -7   1    4.53    1.00
   0   7  -1    3.52    1.25
   0   7  -1    3.58    0.90
   0   7   1    3.85    0.83
   1  -7   1   66.26    3.93
  -1  -7  -1   63.89    3.85
  -1  -7  -1   64.56    3.35
  -1  -7  -1   53.83    3.74
   1  -7   1   60.55    4.26
  -1  -7  -1   64.85    3.56
  -1  -7  -1   63.72    4.12
   1  -7   1   65.98    3.42
  -1  -7  -1   60.34    3.35
  -1  -7  -1   66.06    4.30
   1  -7   1   66.04    3.42
   1   7   1   64.56    3.36
   1   7   1   60.44    3.73
  -1   7  -1   65.07    4.43
   2  -7   1    4.33    0.93
   2  -7   1    4.14    1.15
  -2  -7  -1    2.97    1.09
  -2  -7  -1    1.90    1.17
   2  -7   1    2.68    0.69
   2  -7   1    4.74    1.37
  -2  -7  -1    3.83    0.83
  -2  -7  -1    2.92    1.07
   2  -7   1    3.52    0.70
  -2  -7  -1    3.69    1.40
   2   7   1    4.70    1.20
  -2   7  -1    2.16    1.30
   2   7   1    1.37    0.67
  -3  -7  -1   36.76    3.15
  -3  -7  -1   35.98    2.82
   3  -7   1   36.16    2.22
   3  -7   1   34.51    1.93
   3  -7   1   35.24    2.26
  -3  -7  -1   37.84    3.28
   3  -7   1   40.21    3.08
  -3  -7  -1   38.76    2.26
  -3  -7  -1   37.29    2.78
   3  -7   1   37.11    2.82
   3   7   1   35.48    2.20
   3   7   1   36.03    2.60
   4  -7   1    2.18    0.92
   4  -7   1    2.08    1.01
  -4  -7  -1    2.96    0.74
   4  -7   1    2.06    0.33
  -4  -7  -1    2.68    1.17
  -4  -7  -1    3.95    1.33
   4  -7   1    2.72    0.95
  -4  -7  -1    2.90    1.20
   4  -7   1    2.31    0.62
   4   7   1    2.52    0.90
   4   7   1    1.79    0.66
   5  -7   1    1.31    0.44
  -5  -7  -1   -0.57    1.01
  -5  -7  -1    1.67    1.10
  -5  -7  -1    0.15    1.00
   5  -7   1    1.88    0.47
   5  -7   1    1.30    0.97
   5  -7   1    0.72    0.83
  -5  -7  -1    0.75    0.61
   5   7   1    1.15    0.54
   5   7   1    0.17    0.69
   6  -7   1   10.54    1.59
   6  -7   1   11.57    1.73
   6  -7   1   10.76    0.98
  -6  -7  -1    8.18    1.73
  -6  -7  -1   11.21    1.87
  -6  -7  -1   10.90    1.10
   6  -7   1    9.00    1.10
  -6  -7  -1    7.17    1.71
   6   7   1   10.79    1.00
   6   7   1   10.88    1.54
   7  -7   1   22.89    1.52
  -7  -7  -1   22.04    1.22
  -7  -7  -1   19.19    1.88
   7  -7   1   22.06    1.55
  -7  -7  -1   24.38    2.66
   7  -7   1   22.19    2.24
   7  -7   1   25.50    2.21
  -7  -7  -1   15.85    2.20
  -7  -7  -1   21.23    1.58
   7   7   1   18.67    1.93
   7   7   1   20.20    2.48
  -8  -7  -1    0.19    0.42
   8  -7   1    1.16    0.80
   8  -7   1    0.27    0.33
  -8  -7  -1   -0.22    1.13
   8  -7   1    0.46    0.41
  -8  -7  -1    0.24    0.40
   8  -7   1   -0.49    0.61
  -8  -7  -1   -0.07    0.95
   8   7   1   -0.65    0.74
   8   7   1    0.90    0.66
   8   7   1    1.04    0.81
   9  -7   1   50.57    2.70
   9  -7   1   48.98    2.69
   9  -7   1   47.58    3.30
  -9  -7  -1   50.94    3.60
  -9  -7  -1   53.45    2.54
   9  -7   1   51.25    3.31
  -9  -7  -1   54.69    3.76
  -9  -7  -1   50.33    2.69
   9   7   1   54.29    3.25
   9   7   1   49.65    3.22
   9   7   1   50.94    3.57
  10  -7   1    0.67    0.62
  10  -7   1   -0.08    0.66
 -10  -7  -1    0.72    0.91
 -10  -7  -1    1.41    0.47
 -10  -7  -1    1.28    0.46
  10  -7   1    0.64    0.34
 -10  -7  -1    0.41    1.19
  10   7   1    0.93    0.59
  10   7   1    0.94    0.77
  10   7   1    0.45    0.66
 -11  -7  -1   64.09    4.08
  11  -7   1   63.67    3.72
  11  -7   1   61.65    3.05
  11  -7   1   57.64    3.61
 -11  -7  -1   66.20    3.07
 -11  -7  -1   64.17    2.94
 -11  -7  -1   60.09    3.85
  11   7   1   66.02    3.71
  11   7   1   61.61    3.65
  11   7   1   61.67    3.39
  12  -7   1    0.41    0.51
 -12  -7  -1    1.07    1.03
  12  -7   1    0.41    0.26
  12  -7   1   -0.46    0.55
  12  -7   1    0.93    0.63
 -12  -7  -1    0.36    0.31
  12   7   1   -0.05    0.36
  12   7   1    0.63    0.61
  12   7   1    0.90    0.48
  13  -7   1   76.00    4.01
  13  -7   1   79.94    3.45
  13  -7   1   77.54    3.64
 -13  -7  -1   78.96    4.40
  13   7   1   73.39    3.45
  13   7   1   78.03    4.27
  13   7   1   78.53    4.07
  14  -7   1    0.08    0.35
 -14  -7  -1   -0.52    0.72
  14  -7   1    0.65    0.38
  14   7   1    0.11    0.56
  14   7   1    0.44    0.63
  15  -7   1   31.55    1.82
  15  -7   1   32.44    1.71
  15   7   1   32.23    1.92
  12  -8  -1   -0.24    0.43
  12  -8  -1    0.35    0.38
  12  -8  -1    0.44    0.38
  12  -8  -1    1.16    0.32
 -12  -8   1   -0.30    0.49
 -12  -8   1    0.29    0.44
 -12   8   1   -0.18    0.42
  12   8  -1    0.31    0.49
  12   8  -1    0.24    0.32
  11  -8  -1   62.65    3.40
  11  -8  -1   67.45    3.47
 -11  -8   1   60.12    3.52
  11  -8  -1   65.19    3.16
  11  -8  -1   63.71    3.04
 -11  -8   1   65.84    3.57
  11  -8  -1   68.32    3.11
 -11  -8   1   62.27    3.31
  11   8  -1   65.42    3.45
  11   8  -1   63.10    3.48
  11   8  -1   63.15    3.29
  10  -8  -1    0.33    0.36
 -10  -8   1   -0.40    0.52
  10  -8  -1    0.69    0.48
 -10  -8   1    1.15    0.75
 -10  -8   1   -0.14    0.69
  10  -8  -1    0.42    0.51
  10  -8  -1    0.00    0.25
  10  -8  -1    0.37    0.46
 -10   8   1    0.25    0.46
  10   8  -1   -0.68    0.47
  10   8  -1   -0.39    0.48
  10   8  -1    0.03    0.49
  -9  -8   1   64.08    3.47
   9  -8  -1   63.40    3.59
   9  -8  -1   68.08    3.32
  -9  -8   1   54.11    3.72
   9  -8  -1   64.76    3.64
   9  -8  -1   67.59    3.22
  -9  -8   1   62.08    3.65
   9   8  -1   62.24    3.59
   9   8  -1   67.16    4.01
   9   8  -1   62.33    3.58
  -9   8   1   64.36    3.27
  -8  -8   1    3.57    0.96
  -8  -8   1    1.86    0.73
   8  -8  -1    3.52    0.71
   8  -8  -1    2.69    0.55
   8  -8  -1    1.21    0.70
   8  -8  -1    2.03    0.72
  -8  -8   1    0.51    0.82
   8   8  -1    2.05    0.75
   8   8  -1    2.85    1.12
  -8   8   1    1.95    0.63
  -7  -8   1   67.92    3.30
  -7  -8   1   69.05    3.95
   7  -8  -1   71.98    4.05
  -7  -8   1   62.62    4.17
   7  -8  -1   67.53    3.98
   7  -8  -1   72.16    3.61
  -7  -8   1   70.01    3.69
   7  -8  -1   73.13    3.57
  -7   8   1   65.56    3.53
   7   8  -1   75.21    3.96
   6  -8  -1    1.40    0.63
  -6  -8   1    0.36    0.69
   6  -8  -1    1.34    0.70
  -6  -8   1    1.16    0.63
   6  -8  -1    1.10    0.46
  -6  -8   1    0.58    0.50
  -6  -8   1    1.51    0.88
   6  -8  -1   -0.15    0.66
  -6   8   1    1.07    0.61
   6   8  -1   -0.23    0.60
   6   8  -1    1.14    0.43
   5  -8  -1   21.26    2.01
   5  -8  -1   21.48    1.63
  -5  -8   1   20.16    2.17
   5  -8  -1   21.41    2.09
  -5  -8   1   21.87    2.00
  -5  -8   1   23.16    1.59
  -5  -8   1   23.35    1.61
   5  -8  -1   22.37    1.78
   5   8  -1   23.10    1.53
   5   8  -1   20.86    1.95
  -5   8   1   24.58    1.71
   4  -8  -1   20.44    1.92
   4  -8  -1   19.48    1.54
  -4  -8   1   13.50    1.86
   4  -8  -1   20.70    2.05
  -4  -8   1   20.95    1.83
  -4  -8   1   17.62    1.34
  -4  -8   1   21.22    1.53
   4  -8  -1   17.19    1.43
   4   8  -1   21.57    1.89
   4   8  -1   18.57    1.42
  -4   8   1   19.47    1.56
   3  -8  -1    1.48    0.44
   3  -8  -1    2.22    0.95
  -3  -8   1    1.87    0.92
   3  -8  -1    2.57    0.72
   3  -8  -1    1.02    0.59
  -3  -8   1    1.70    0.65
   3  -8  -1    2.38    0.83
   3  -8  -1    1.72    0.78
  -3  -8   1    2.37    0.87
   3   8  -1    1.76    0.80
   3   8  -1    1.14    0.58
  -3   8   1    4.12    0.75
  -2  -8   1    7.56    1.00
   2  -8  -1    8.89    1.11
  -2  -8   1    9.95    1.63
   2  -8  -1    5.96    1.16
   2  -8  -1    9.21    0.89
  -2  -8   1    7.32    1.13
  -2  -8   1    9.02    1.27
   2  -8  -1    8.62    1.17
   2  -8  -1    7.71    1.35
  -2  -8   1    7.88    1.35
   2  -8  -1    8.42    1.17
   2   8  -1    7.49    1.03
   2   8  -1   10.31    1.46
  -2   8   1    8.63    1.03
  -1  -8   1    5.16    0.98
   1  -8  -1    4.61    1.15
  -1  -8   1    5.18    0.95
  -1  -8   1    3.91    0.81
   1  -8  -1    6.15    0.92
   1  -8  -1    4.99    1.12
  -1  -8   1    5.71    0.88
  -1  -8   1    3.88    1.18
   1  -8  -1    5.61    1.01
   1  -8  -1    6.36    0.92
   1  -8  -1    4.64    0.96
  -1  -8   1    3.69    1.02
   1   8  -1    5.51    1.18
  -1   8   1    5.71    0.84
   1   8  -1    4.69    0.85
   0  -8   1    6.59    0.97
   0  -8  -1    6.75    1.36
   0  -8  -1    9.59    1.12
   0  -8   1    8.85    1.17
   0  -8   1    6.95    1.32
   0  -8   1    8.66    0.96
   0  -8   1    7.55    1.02
   0  -8  -1    7.09    1.02
   0  -8  -1    6.50    1.21
   0  -8   1    6.61    1.30
   0  -8  -1    8.32    1.21
   0   8  -1    8.14    1.09
   0   8   1    8.63    1.02
  -1  -8  -1   25.84    2.37
   1  -8   1   27.64    1.78
   1  -8   1   24.54    1.88
   1  -8   1   25.73    1.48
   1  -8   1   27.57    2.24
  -1  -8  -1   23.64    1.96
  -1  -8  -1   24.84    1.80
   1  -8   1   27.03    2.41
   1  -8   1   26.02    1.85
  -1   8  -1   25.95    1.84
   1   8   1   27.60    1.75
   2  -8   1    0.63    0.75
  -2  -8  -1    0.38    0.50
  -2  -8  -1    0.08    0.83
  -2  -8  -1   -0.07    0.68
   2  -8   1    0.18    0.75
  -2  -8  -1    0.88    0.59
   2  -8   1    0.14    0.49
   2  -8   1    0.58    0.49
   2  -8   1    0.58    0.72
   2   8   1    1.14    0.51
   2   8   1    1.33    0.72
  -2   8  -1   -0.21    0.59
   3  -8   1   65.87    4.43
   3  -8   1   83.82    4.77
   3  -8   1   87.47    4.21
  -3  -8  -1   85.99    4.58
   3  -8   1   83.69    4.71
   3  -8   1   81.17    4.06
  -3  -8  -1   80.14    4.80
  -3  -8  -1   86.13    4.04
  -3  -8  -1   83.51    4.09
   3   8   1   86.85    4.00
   3   8   1   83.68    4.47
  -3   8  -1   80.99    4.15
   4  -8   1    1.35    0.55
  -4  -8  -1    0.76    0.86
   4  -8   1    1.66    0.84
  -4  -8  -1    0.58    0.51
  -4  -8  -1    2.16    0.63
   4  -8   1    3.51    0.62
   4  -8   1    2.10    0.93
  -4  -8  -1    1.55    1.00
   4   8   1    1.87    0.53
  -4   8  -1    0.56    0.65
   4   8   1    1.67    0.81
  -5  -8  -1   82.81    3.82
  -5  -8  -1   86.08    4.26
  -5  -8  -1   80.84    4.55
   5  -8   1   81.56    4.06
   5  -8   1   82.68    4.60
  -5  -8  -1   65.57    4.55
   5  -8   1   88.31    4.76
   5   8   1   83.89    3.82
   5   8   1   84.31    4.47
  -6  -8  -1    2.27    0.81
  -6  -8  -1    3.46    1.15
   6  -8   1    1.65    0.80
   6  -8   1    1.51    0.70
  -6  -8  -1    2.98    0.96
   6  -8   1    1.51    0.50
   6   8   1    1.90    0.78
   6   8   1    1.48    1.00
  -7  -8  -1   49.21    3.18
  -7  -8  -1   47.18    3.15
   7  -8   1   46.04    3.00
  -7  -8  -1   45.52    2.87
   7  -8   1   46.43    3.03
   7  -8   1   47.11    2.51
   7   8   1   45.18    2.93
   7   8   1   48.87    3.42
   7   8   1   44.40    2.98
   8  -8   1    0.45    0.31
  -8  -8  -1   -0.04    0.85
  -8  -8  -1    0.83    0.74
   8  -8   1    0.30    0.52
   8  -8   1   -0.10    0.46
  -8  -8  -1   -0.01    0.67
   8   8   1    1.82    0.72
   8   8   1   -0.45    0.55
   8   8   1   -0.25    0.57
   9  -8   1   25.09    1.44
  -9  -8  -1   23.13    1.90
   9  -8   1   22.53    1.84
  -9  -8  -1   24.28    2.17
   9  -8   1   24.71    1.95
  -9  -8  -1   21.74    1.95
   9   8   1   25.40    2.07
   9   8   1   25.16    1.90
   9   8   1   25.63    1.82
  10  -8   1   20.79    1.72
  10  -8   1   24.05    1.45
 -10  -8  -1   23.24    2.15
  10  -8   1   22.22    1.71
 -10  -8  -1   23.50    1.77
  10   8   1   22.71    1.78
  10   8   1   24.26    1.81
  10   8   1   23.50    1.59
  11  -8   1    3.49    0.63
  11  -8   1    3.58    0.43
 -11  -8  -1    4.10    0.74
  11  -8   1    4.38    0.58
  11  -8   1    2.14    0.60
  11   8   1    4.58    0.81
  11   8   1    2.58    0.53
  11   8   1    3.24    0.56
  12  -8   1   13.62    0.91
  12  -8   1   11.58    1.03
 -12  -8  -1   14.23    1.16
  12   8   1   13.49    1.18
   9  -9  -1    0.09    0.43
   9  -9  -1   -0.05    0.28
   9  -9  -1    0.32    0.26
   9  -9  -1    0.52    0.36
   9   9  -1    0.10    0.60
   9   9  -1    0.50    0.40
  -8  -9   1   22.40    1.42
   8  -9  -1   21.02    1.43
  -8  -9   1   19.21    1.48
   8  -9  -1   22.92    1.30
   8  -9  -1   23.21    1.25
   8  -9  -1   20.90    1.48
   8   9  -1   22.14    1.53
  -8   9   1   22.24    1.30
   8   9  -1   19.91    1.67
  -7  -9   1    3.22    0.71
   7  -9  -1    1.28    0.52
   7  -9  -1    1.97    0.45
  -7  -9   1    1.26    0.44
   7  -9  -1    2.37    0.44
   7  -9  -1    2.20    0.56
   7   9  -1    2.13    0.61
   7   9  -1    2.00    0.77
  -7   9   1    1.99    0.45
   6  -9  -1    9.30    1.07
   6  -9  -1   10.21    0.82
   6  -9  -1    9.78    1.07
  -6  -9   1    7.38    0.82
   6  -9  -1    9.22    0.89
  -6  -9   1    8.46    1.12
   6   9  -1    9.28    1.11
  -6   9   1    8.34    0.88
   6   9  -1    8.87    1.35
   5  -9  -1   21.22    1.63
  -5  -9   1   18.04    1.67
   5  -9  -1   20.43    1.34
  -5  -9   1   22.77    1.33
   5  -9  -1   21.32    1.42
   5  -9  -1   20.90    1.64
   5   9  -1   19.40    1.58
  -5   9   1   18.83    1.33
   4  -9  -1   15.12    1.47
  -4  -9   1   17.27    1.09
   4  -9  -1   15.58    1.51
  -4  -9   1   14.53    1.52
   4  -9  -1   15.73    1.25
  -4  -9   1   16.00    1.08
   4  -9  -1   17.90    1.21
   4   9  -1   16.28    1.07
   4   9  -1   14.82    1.46
  -4   9   1   17.47    1.22
   3  -9  -1   16.22    1.30
   3  -9  -1   14.91    1.54
  -3  -9   1   18.26    1.20
  -3  -9   1   16.27    1.01
  -3  -9   1   15.54    1.57
   3  -9  -1   17.44    1.25
   3  -9  -1   19.35    1.61
   3   9  -1   14.00    1.50
   3   9  -1   18.40    1.19
  -3   9   1   18.36    1.27
   2  -9  -1   -0.41    0.56
  -2  -9   1    0.42    0.43
   2  -9  -1    0.08    0.46
   2  -9  -1   -0.11    0.57
   2  -9  -1    0.12    0.41
  -2  -9   1    0.66    0.56
  -2   9   1    0.30    0.41
   2   9  -1    0.93    0.41
   1  -9  -1   31.36    2.21
   1  -9  -1   31.01    1.85
  -1  -9   1   31.90    2.31
   1  -9  -1   31.11    2.25
  -1  -9   1   33.19    2.10
   1  -9  -1   31.81    2.06
  -1  -9   1   35.55    1.92
   1   9  -1   34.15    1.88
  -1   9   1   33.96    1.88
   0  -9   1   23.33    1.86
   0  -9   1   23.02    1.81
   0  -9  -1   21.39    1.43
   0  -9  -1   20.53    1.80
   0  -9   1   20.99    1.59
   0  -9   1   24.60    1.51
   0  -9  -1   21.76    1.08
   0   9   1   23.49    1.46
   0   9  -1   24.19    1.49
  -1  -9  -1   29.29    1.63
  -1  -9  -1   26.87    1.45
   1  -9   1   26.36    1.76
   1  -9   1   24.97    2.04
  -1  -9  -1   27.23    2.04
   1  -9   1   26.34    1.96
   1  -9   1   29.03    1.73
   1   9   1   25.71    1.58
  -1   9  -1   28.05    1.68
   2  -9   1   29.38    2.13
   2  -9   1   31.23    1.89
   2  -9   1   29.37    1.82
   2  -9   1   27.04    2.13
  -2  -9  -1   31.19    1.69
  -2  -9  -1   29.95    2.14
  -2  -9  -1   31.94    1.67
  -2   9  -1   31.23    1.80
   2   9   1   29.86    1.64
   3  -9   1    3.69    0.79
   3  -9   1    2.78    0.62
   3  -9   1    3.14    0.83
  -3  -9  -1    4.02    0.52
  -3  -9  -1    3.28    0.73
  -3  -9  -1    2.86    0.57
   3  -9   1    4.23    0.68
   3   9   1    4.38    0.87
   3   9   1    3.49    0.49
  -3   9  -1    2.04    0.55
   4  -9   1   23.72    1.44
   4  -9   1   23.24    1.74
   4  -9   1   22.43    1.76
   4  -9   1   21.13    1.42
  -4  -9  -1   19.11    1.65
  -4  -9  -1   20.08    1.45
   4   9   1   20.82    1.65
  -4   9  -1   22.47    1.46
   5  -9   1    1.06    0.47
  -5  -9  -1    0.94    0.54
  -5  -9  -1    0.38    0.45
   5  -9   1    0.23    0.49
   5  -9   1    0.19    0.45
   5  -9   1    0.80    0.37
  -5   9  -1    0.12    0.41
   5   9   1    0.97    0.74
   5   9   1    0.56    0.51
   6  -9   1   19.59    1.35
   6  -9   1   24.07    1.70
   6  -9   1   24.01    1.64
  -6  -9  -1   22.59    1.52
   6  -9   1   22.56    1.33
  -6  -9  -1   16.95    1.51
   6   9   1   19.89    1.60
  -6   9  -1   22.79    1.41
   6   9   1   22.98    1.90
  -7  -9  -1    2.68    0.59
   7  -9   1    3.36    0.60
   7  -9   1    3.62    0.73
   7  -9   1    5.61    0.69
   7   9   1    3.33    0.67
  -7   9  -1    3.87    0.57
   7   9   1    6.67    1.02
   8  -9   1   18.92    1.09
   8  -9   1   18.09    1.30
   8  -9   1   17.60    1.34
   8   9   1   17.35    1.39
   8   9   1   18.90    1.35
  22   0  -2   45.56    2.14
 -22   0   2   41.77    2.39
 -22   0   2   44.85    2.15
  21   0  -2    0.55    0.43
 -21   0   2   -0.26    0.41
 -21   0   2   -0.12    0.44
  21   0  -2   -0.36    0.44
  20   0  -2   76.33    3.29
 -20   0   2   73.70    3.76
  20   0  -2   74.18    3.82
  20   0  -2   75.95    3.81
 -20   0   2   75.38    3.81
 -19   0   2   -0.01    0.58
  19   0  -2    0.20    0.38
  19   0  -2   -0.04    0.33
 -19   0   2   -0.69    0.66
  19   0  -2   -0.10    0.66
  19   0  -2    0.94    0.60
  19   0  -2    0.49    0.40
  18   0  -2  141.32    6.55
 -18   0   2  145.30    6.90
  18   0  -2  144.86    6.98
  18   0  -2  137.73    6.82
  18   0  -2  150.59    7.01
  18   0  -2  140.93    6.94
  18   0  -2  149.97    6.55
  18   0  -2  146.73    6.55
 -18   0   2  145.62    6.83
  17   0  -2    1.15    0.69
 -17   0   2    0.57    0.81
  17   0  -2    0.03    0.41
  17   0  -2    0.14    0.69
  17   0  -2   -0.07    0.50
  17   0  -2    0.79    0.56
  17   0  -2    0.42    0.49
 -17   0   2    0.14    0.79
  17   0  -2    0.33    0.86
  17   0  -2    0.03    0.55
  16   0  -2   53.07    3.41
  16   0  -2   58.20    3.29
  16   0  -2   51.22    3.03
 -16   0   2   50.72    3.30
  16   0  -2   53.05    2.80
  16   0  -2   50.84    2.97
  16   0  -2   53.48    3.28
  16   0  -2   52.99    2.94
  16   0  -2   51.63    3.11
  15   0  -2    0.61    1.15
 -15   0   2    0.24    0.92
  15   0  -2    0.45    0.60
  15   0  -2    0.82    0.88
 -15   0   2    0.95    0.92
  15   0  -2    0.35    0.51
  15   0  -2    0.54    0.67
  15   0  -2    0.84    0.59
  15   0  -2   -0.04    0.52
  15   0  -2    0.57    0.57
  14   0  -2  121.13    5.96
  14   0  -2  123.14    5.80
 -14   0   2  119.06    7.13
  14   0  -2  125.09    5.91
  14   0  -2  123.47    5.77
 -13   0   2   -0.19    0.50
 -13   0   2    0.31    0.70
  13   0  -2    0.36    0.43
  13   0  -2    0.81    0.55
  13   0  -2    0.53    1.08
 -12   0   2    7.86    1.58
  12   0  -2    9.26    1.12
  12   0  -2    7.68    2.06
 -12   0   2    6.78    1.21
  11   0  -2    0.31    0.84
  11   0  -2    0.27    0.11
 -11   0   2   -0.16    0.60
  11   0  -2    2.40    0.58
 -11   0   2   -0.11    0.42
  10   0  -2   28.80    1.73
  10   0  -2   29.42    1.53
  10   0  -2   28.19    2.96
 -10   0   2   28.83    2.38
 -10   0   2   29.37    1.97
   9   0  -2    0.17    0.32
   9   0  -2    0.21    0.58
  -9   0   2    0.20    0.51
  -9   0   2    0.40    0.38
   8   0  -2  156.26    8.41
  -8   0   2  163.34    7.67
   8   0  -2  161.62    6.95
  -8   0   2  162.04    7.18
  -7   0   2    0.24    0.89
  -7   0   2    0.23    0.30
   7   0  -2    0.18    0.50
   7   0  -2    0.70    0.97
  -7   0   2    0.00    0.42
  -7   0   2    0.20    0.40
   7   0  -2    0.36    0.27
  -7   0   2    0.79    0.72
  -6   0   2  355.00   18.66
  -6   0   2  402.96   17.93
  -6   0   2  421.45   18.17
  -6   0   2  459.49   17.81
  -6   0   2  496.42   21.52
   6   0  -2  425.69   18.84
   6   0  -2  460.85   20.82
   6   0  -2  393.47   17.72
   5   0  -2   -0.27    0.58
   5   0  -2   -0.18    0.24
   5   0  -2    0.28    0.51
  -5   0   2    0.95    0.93
  -5   0   2   -0.11    0.28
  -5   0   2   -0.17    0.32
  -5   0   2   -0.10    0.43
   5   0  -2    0.18    0.16
  -5   0   2    0.32    0.43
  -4   0   2  690.28   28.76
  -4   0   2  728.14   29.04
  -4   0   2  661.60   28.86
   4   0  -2  788.62   31.20
   4   0  -2  630.80   28.64
  -4   0   2  714.97   29.55
   4   0  -2  696.75   29.52
  -3   0   2    0.38    0.71
  -3   0   2    0.51    0.29
   3   0  -2    0.09    0.61
   3   0  -2    0.07    0.20
   3   0  -2    0.06    0.35
  -3   0   2    0.45    0.32
  -3   0   2   -0.27    0.36
  -2   0   2  735.21   33.76
  -2   0   2  774.57   33.70
   2   0  -2  867.01   35.35
   2   0  -2  801.81   34.21
   2   0  -2  791.35   33.72
  -2   0   2  921.98   35.49
  -2   0   2  901.47   34.27
   1   0  -2    0.11    0.11
  -1   0   2    0.14    0.42
  -1   0   2    0.75    0.33
  -1   0   2    0.01    0.05
   1   0  -2    0.33    0.48
  -1   0   2    0.26    0.26
   1   0  -2    0.07    0.24
  -1   0   2    0.35    0.17
   0   0   2  201.96    8.88
   0   0   2  187.76    9.52
   0   0  -2  204.38    8.87
   0   0   2  221.91    8.85
   0   0   2  193.43    8.28
  -1   0  -2    0.32    0.45
  -1   0  -2    0.60    0.28
   1   0   2    0.45    0.26
   1   0   2    0.14    0.27
  -1   0  -2    0.65    0.42
  -2   0  -2    4.31    0.96
   2   0   2    4.77    0.89
   2   0   2    5.20    0.58
  -2   0  -2    4.52    0.84
   3   0   2    0.28    0.34
   3   0   2    0.73    0.54
  -3   0  -2    0.03    0.49
  -3   0  -2    0.15    0.51
  -3   0  -2    0.24    0.20
  -4   0  -2   97.64    5.69
   4   0   2   99.52    4.64
   4   0   2   83.23    4.52
   4   0   2   95.21    5.23
  -4   0  -2  104.98    4.27
  -4   0  -2   96.38    5.78
  -5   0  -2    0.22    0.09
   5   0   2    1.16    0.49
  -5   0  -2    0.50    0.66
  -5   0  -2    0.29    0.28
   5   0   2    0.41    0.53
   5   0   2    0.04    0.32
   6   0   2  132.89    6.21
  -6   0  -2  129.21    5.41
   6   0   2  121.92    6.92
  -6   0  -2  122.49    5.68
  -6   0  -2  123.14    7.88
  -7   0  -2    1.54    0.41
   7   0   2    0.15    0.23
   7   0   2    0.20    0.52
  -7   0  -2    0.00    0.31
   7   0   2   -0.03    0.35
  -8   0  -2  316.29   12.24
   8   0   2  240.52   12.64
   8   0   2  272.49   11.57
  -8   0  -2  280.48   11.86
   9   0   2    0.01    0.48
  -9   0  -2    0.26    0.42
   9   0   2    0.25    0.30
  -9   0  -2    0.06    0.38
 -10   0  -2  452.92   18.97
 -10   0  -2  449.83   19.24
  10   0   2  428.30   18.45
  11   0   2    0.42    0.68
 -11   0  -2   -0.10    0.50
  11   0   2    0.30    0.32
 -11   0  -2    1.06    0.58
  12   0   2  103.34    4.92
  12   0   2  105.40    5.01
 -12   0  -2  121.32    5.98
 -12   0  -2   98.58    5.54
  13   0   2    0.96    0.39
 -13   0  -2    0.34    0.69
  13   0   2    1.92    0.58
  13   0   2    0.13    0.84
 -13   0  -2    0.42    0.65
  13   0   2   -0.06    0.39
 -14   0  -2   24.93    2.45
  14   0   2   23.97    1.70
  14   0   2   24.40    1.66
  14   0   2   23.40    1.72
  14   0   2   23.57    1.62
  14   0   2   25.00    1.66
  15   0   2    0.48    0.52
  15   0   2    0.16    0.47
  15   0   2    0.22    0.44
 -15   0  -2   -0.09    0.81
  15   0   2    0.46    0.45
  15   0   2   -0.85    0.73
  15   0   2    0.34    0.43
  16   0   2   23.77    1.73
  16   0   2   23.80    1.52
  16   0   2   21.72    1.66
  16   0   2   22.76    1.41
  16   0   2   25.41    1.88
  16   0   2   22.90    1.51
  17   0   2    1.23    0.34
 -17   0  -2   -0.77    0.80
  17   0   2    0.32    0.50
  17   0   2    0.79    0.39
  17   0   2    0.44    0.57
 -18   0  -2    0.14    0.68
  18   0   2    0.11    0.72
  18   0   2    1.27    0.58
  19   0   2    1.37    0.58
  19   0   2    0.21    0.45
 -19   0  -2    1.08    0.57
 -19   0  -2    0.63    0.56
  20   0   2   23.18    1.51
 -20   0  -2   21.21    1.51
  20   0   2   26.75    1.61
 -20   0  -2   23.57    1.56
  21   0   2    0.37    0.30
  21   0   2   -0.56    0.33
 -21   0  -2   -0.08    0.32
 -21   0  -2    0.31    0.33
 -22   1   2   14.90    1.38
 -22   1   2   19.10    1.30
 -21  -1   2    9.83    0.98
  21  -1  -2   11.13    1.04
  21  -1  -2   10.20    1.00
 -21  -1   2   12.91    1.32
 -21  -1   2   10.76    0.98
 -21   1   2   11.64    1.08
  21   1  -2   10.89    0.99
 -21   1   2   10.40    1.00
 -20  -1   2   14.57    1.25
 -20  -1   2   13.36    1.33
  20  -1  -2   13.85    1.26
  20  -1  -2   11.53    1.31
 -20   1   2   14.38    1.42
  20   1  -2   13.94    1.29
  20   1  -2   14.18    1.29
  20   1  -2   13.71    1.04
  20   1  -2   15.58    1.08
 -20   1   2   11.22    1.22
  19  -1  -2   38.68    1.84
  19  -1  -2   42.05    2.55
 -19  -1   2   40.77    2.45
  19  -1  -2   39.79    2.49
 -19  -1   2   42.52    2.52
  19   1  -2   42.72    2.34
 -19   1   2   39.35    2.57
  19   1  -2   39.35    2.31
  19   1  -2   41.79    2.51
  19   1  -2   43.84    2.57
  19   1  -2   41.51    2.38
 -19   1   2   39.59    2.51
  18  -1  -2    5.15    1.06
 -18  -1   2    2.91    0.90
  18  -1  -2    4.23    0.62
  18  -1  -2    3.43    0.93
  18  -1  -2    4.15    0.58
  18  -1  -2    5.26    1.04
 -18  -1   2    4.01    0.95
  18  -1  -2    4.19    0.89
  18   1  -2    3.18    0.80
  18   1  -2    4.00    0.96
 -18   1   2    3.37    0.95
  18   1  -2    4.05    0.86
  18   1  -2    4.09    0.66
  18   1  -2    4.55    0.96
  18   1  -2    4.00    0.82
 -17  -1   2   27.32    2.19
 -17  -1   2   25.49    2.22
  17  -1  -2   27.55    2.25
  17  -1  -2   30.89    2.15
  17  -1  -2   29.81    2.41
  17  -1  -2   29.27    2.13
  17  -1  -2   30.14    1.80
  17  -1  -2   30.69    1.79
  17  -1  -2   29.79    1.78
  17   1  -2   31.20    2.22
  17   1  -2   34.18    2.26
  17   1  -2   30.75    1.97
 -17   1   2   30.99    2.34
  17   1  -2   27.07    2.04
  17   1  -2   27.83    2.29
  17   1  -2   27.41    2.10
 -16  -1   2   19.19    1.90
  16  -1  -2   19.41    1.50
  16  -1  -2   22.30    2.25
  16  -1  -2   19.79    1.49
  16  -1  -2   21.03    1.73
  16  -1  -2   21.08    1.73
 -16  -1   2   19.98    1.99
  16  -1  -2   20.51    1.49
  16   1  -2   21.36    1.72
  16   1  -2   21.12    1.72
 -16   1   2   15.47    1.80
  16   1  -2   18.28    1.68
  16   1  -2   18.15    1.81
  16   1  -2   22.14    2.17
  16   1  -2   20.12    1.87
  16   1  -2   21.64    2.02
  15  -1  -2    6.00    0.88
  15  -1  -2    3.12    1.56
  15  -1  -2    7.02    1.13
 -15  -1   2    4.08    1.15
  15  -1  -2    7.30    0.80
 -15  -1   2    6.96    1.24
  15  -1  -2    5.44    1.01
  15  -1  -2    5.97    0.94
  15  -1  -2    3.79    0.76
  15  -1  -2    5.43    1.27
  15   1  -2    7.78    1.23
  15   1  -2    5.53    1.09
 -15   1   2    5.41    1.60
  15   1  -2    3.39    1.23
  15   1  -2    4.86    1.21
  15   1  -2    5.73    1.11
  15   1  -2    6.33    1.08
  15   1  -2    5.24    1.02
 -14  -1   2  158.80    9.01
  14  -1  -2  173.36    7.57
  14  -1  -2  174.17    7.91
  14  -1  -2  176.81    7.87
  14  -1  -2  182.06    7.64
 -14   1   2  154.00    8.96
  14   1  -2  170.82    7.87
  14   1  -2  162.97    7.82
  14   1  -2  173.26    7.95
  13  -1  -2    1.73    0.62
  13  -1  -2    1.28    0.57
  13  -1  -2    0.80    0.58
 -13  -1   2    1.39    0.75
 -13  -1   2    0.70    0.93
  13   1  -2    0.99    0.37
 -13   1   2    0.70    0.62
  13   1  -2    1.15    1.30
 -13   1   2    1.22    0.93
  13   1  -2    1.19    0.58
  12  -1  -2  245.17   13.39
  12  -1  -2  254.69   10.86
 -12  -1   2  245.07   11.32
 -12  -1   2  253.77   12.14
  12   1  -2  250.53   10.57
 -12   1   2  244.33   11.99
  12   1  -2  253.27   10.58
 -12   1   2  243.37   11.22
  12   1  -2  241.44   10.82
 -11  -1   2    1.83    0.91
 -11  -1   2    1.01    0.58
  11  -1  -2    1.35    0.49
  11  -1  -2    2.06    1.16
 -11   1   2    2.16    0.94
  11   1  -2    1.10    0.91
  11   1  -2    2.07    0.57
  11   1  -2    1.24    0.37
 -11   1   2    1.56    0.64
 -10  -1   2  122.05    6.00
 -10  -1   2  130.16    6.63
  10  -1  -2  110.78    7.42
  10  -1  -2  131.30    5.65
 -10   1   2  130.71    5.95
  10   1  -2  122.46    7.62
  10   1  -2  125.12    5.67
 -10   1   2  129.71    6.66
  10   1  -2  121.55    5.68
   9  -1  -2    1.58    1.38
  -9  -1   2    0.99    0.65
  -9  -1   2    1.36    0.52
   9  -1  -2    0.38    0.32
   9  -1  -2    0.80    0.39
   9  -1  -2    1.17    0.86
  -9   1   2    0.81    0.61
  -9   1   2    1.95    0.54
   9   1  -2    0.70    0.76
   9   1  -2    1.56    0.48
   8  -1  -2  135.66    5.94
  -8  -1   2  159.38    6.60
   8  -1  -2  136.79    6.18
   8  -1  -2  147.18    6.35
  -8  -1   2  126.16   11.99
  -8  -1   2  150.57    7.02
   8  -1  -2  150.24    8.01
  -8   1   2  136.32    6.37
   8   1  -2  142.18    6.25
  -8   1   2  145.66    7.02
   8   1  -2  141.87    7.85
   7  -1  -2   35.99    2.98
   7  -1  -2   32.03    1.65
   7  -1  -2   34.16    1.86
  -7  -1   2   37.25    4.45
  -7  -1   2   31.07    2.21
   7  -1  -2   35.10    1.73
  -7  -1   2   33.75    1.98
  -7  -1   2   35.61    2.85
  -7   1   2   36.83    2.35
  -7   1   2   34.20    1.88
   7   1  -2   34.07    2.81
  -7   1   2   37.02    4.45
  -6  -1   2   49.73    4.75
   6  -1  -2   44.61    2.22
  -6  -1   2   43.01    3.17
  -6  -1   2   44.74    2.69
  -6  -1   2   46.62    2.44
   6  -1  -2   51.31    3.52
   6  -1  -2   46.48    4.09
   6  -1  -2   47.78    2.38
  -6   1   2   50.15    4.93
   6   1  -2   52.85    4.77
  -6   1   2   46.56    2.66
  -6   1   2   47.52    2.34
   6   1  -2   48.71    3.27
  -6   1   2   46.66    3.46
  -6   1   2   47.33    2.70
  -5  -1   2  159.85    9.35
   5  -1  -2  165.93    7.62
   5  -1  -2  153.43    7.87
   5  -1  -2  146.67    6.56
  -5  -1   2  155.00    6.71
  -5  -1   2  144.57    6.94
   5  -1  -2  149.54    6.67
  -5  -1   2  137.44    7.43
  -5   1   2  145.72    6.87
   5   1  -2  158.43    6.68
   5   1  -2  155.56    7.56
  -5   1   2  156.53    7.90
   5   1  -2  171.63    9.49
  -5   1   2  162.29    9.71
  -5   1   2  169.96    6.64
  -5   1   2  134.73    6.85
  -4  -1   2   22.00    1.68
   4  -1  -2   25.26    1.47
  -4  -1   2   30.12    1.49
   4  -1  -2   30.63    2.93
   4  -1  -2   23.96    1.36
   4  -1  -2   28.99    2.35
  -4  -1   2   27.15    2.90
   4  -1  -2   25.08    3.09
  -4  -1   2   26.75    1.97
   4  -1  -2   27.34    2.09
   4   1  -2   26.59    1.47
   4   1  -2   24.50    1.51
  -4   1   2   25.60    1.58
   4   1  -2   25.57    1.94
  -4   1   2   26.19    2.24
  -4   1   2   26.34    1.38
   4   1  -2   27.39    2.93
  -4   1   2   23.10    1.51
  -4   1   2   27.65    3.18
  -3  -1   2  180.31    8.07
   3  -1  -2  158.62    7.60
   3  -1  -2  197.55    9.79
  -3  -1   2  184.73    7.49
   3  -1  -2  172.53    9.87
   3  -1  -2  184.10    8.76
  -3  -1   2  197.10    9.53
   3   1  -2  173.66    7.55
  -3   1   2  182.36    8.71
  -3   1   2  161.62    9.85
   3   1  -2  194.69    9.58
  -3   1   2  160.70    7.58
   3   1  -2  172.16    7.59
  -3   1   2  164.18    7.46
   3   1  -2  179.95    8.13
  -3   1   2  173.34    7.64
  -2  -1   2   27.33    1.70
  -2  -1   2   27.79    1.24
   2  -1  -2   25.37    2.27
   2  -1  -2   23.17    2.72
   2  -1  -2   26.71    2.23
   2  -1  -2   27.37    1.27
   2  -1  -2   28.12    3.03
  -2  -1   2   26.34    2.51
  -2  -1   2   28.41    2.44
  -2   1   2   27.67    1.47
  -2   1   2   28.26    2.35
  -2   1   2   28.39    3.16
  -2   1   2   25.98    1.43
  -2   1   2   24.44    1.34
   2   1  -2   25.82    1.37
   2   1  -2   31.58    2.55
   2   1  -2   29.39    1.78
   2   1  -2   28.71    1.43
   1  -1  -2  240.75   12.20
  -1  -1   2  237.42   10.32
  -1  -1   2  272.17   11.22
   1  -1  -2  238.94   13.06
   1  -1  -2  243.50   11.13
   1  -1  -2  226.17   10.04
  -1  -1   2  216.29   11.11
  -1   1   2  227.18   10.08
  -1   1   2  240.01   12.32
   1   1  -2  252.51    9.93
  -1   1   2  248.72   11.26
  -1   1   2  226.44   10.11
   1   1  -2  249.49   10.40
   1   1  -2  265.73   11.33
  -1   1   2  268.24   13.72
  -1   1   2  233.64   10.10
   1   1  -2  241.33   10.06
   0  -1  -2  488.83   20.54
   0  -1  -2  515.85   19.69
   0  -1  -2  460.99   22.65
   0  -1   2  514.02   19.75
   0  -1  -2  510.23   21.99
   0  -1   2  463.75   20.19
   0  -1   2  462.71   20.06
   0   1  -2  444.01   20.35
   0   1   2  478.32   22.62
   0   1   2  445.92   19.66
   0   1  -2  442.80   20.26
   0   1   2  540.58   22.09
   0   1   2  473.96   20.55
   0   1   2  469.81   19.68
  -1  -1  -2   37.65    1.83
  -1  -1  -2   39.53    2.48
   1  -1   2   38.94    1.72
  -1  -1  -2   40.21    3.61
  -1  -1  -2   41.08    3.44
   1   1   2   39.37    3.30
   1   1   2   43.71    3.66
  -1   1  -2   38.40    1.88
   1   1   2   39.00    1.79
   1   1   2   35.15    1.80
  -1   1  -2   31.26    1.93
  -2  -1  -2  125.66    5.77
  -2  -1  -2  132.18    5.62
  -2  -1  -2  132.16    6.31
  -2  -1  -2  137.64    7.70
  -2  -1  -2  134.84    7.86
   2   1   2  113.07    7.35
   2   1   2  127.97    5.48
   2   1   2  131.54    5.58
   2   1   2  139.22    7.59
  -3  -1  -2   13.58    2.07
  -3  -1  -2   12.68    0.89
  -3  -1  -2   13.87    2.18
  -3  -1  -2   17.82    1.49
   3   1   2   13.70    2.13
  -3   1  -2   11.19    0.96
   3   1   2   14.51    2.12
   3   1   2   12.14    0.81
   3   1   2   12.67    1.33
  -4  -1  -2  463.14   17.91
   4  -1   2  378.39   17.70
  -4  -1  -2  387.30   18.65
   4  -1   2  447.24   17.95
  -4  -1  -2  416.92   20.80
  -4  -1  -2  406.84   18.04
  -4  -1  -2  449.72   20.84
  -4   1  -2  481.56   18.83
   4   1   2  391.42   18.63
   4   1   2  459.91   20.63
   4   1   2  451.56   17.80
  -5  -1  -2   11.80    1.45
   5  -1   2   12.41    1.03
   5  -1   2   10.04    0.81
  -5  -1  -2   10.89    2.12
  -5  -1  -2   11.44    0.90
  -5  -1  -2   10.23    0.99
   5   1   2    9.79    0.88
  -5   1  -2   10.53    0.59
   5   1   2   10.56    0.77
  -5   1  -2   11.75    0.58
  -5   1  -2   12.37    1.62
   5   1   2   13.38    2.18
  -6  -1  -2  279.52   11.90
  -6  -1  -2  269.82   12.11
  -6  -1  -2  260.13   15.12
   6  -1   2  308.39   12.03
   6  -1   2  252.08   12.14
   6   1   2  277.90   11.66
   6   1   2  281.46   11.61
  -6   1  -2  279.20   11.75
   6   1   2  275.37   12.88
  -6   1  -2  302.04   14.05
   7  -1   2   11.79    1.23
   7  -1   2    9.25    0.99
  -7  -1  -2   13.41    1.23
  -7  -1  -2   10.80    1.06
  -7   1  -2   10.44    0.96
   7   1   2   11.70    0.77
   7   1   2   11.62    1.55
   7   1   2   10.88    0.78
   8  -1   2  122.96    5.86
  -8  -1  -2  106.84    5.54
   8  -1   2  113.30    4.79
  -8  -1  -2  115.21    5.35
   8   1   2  110.30    4.78
   8   1   2  104.58    4.91
  -8   1  -2  104.06    5.24
   8   1   2  112.56    6.35
  -9  -1  -2   31.45    2.31
  -9  -1  -2   30.03    2.09
   9  -1   2   31.16    1.62
   9  -1   2   32.91    2.50
  -9   1  -2   32.12    2.11
   9   1   2   31.84    1.73
   9   1   2   27.62    2.74
 -10  -1  -2    1.55    0.76
  10  -1   2    2.39    0.48
 -10  -1  -2    1.58    0.71
  10  -1   2    1.20    0.73
  10   1   2    2.25    0.51
 -10   1  -2    1.81    0.66
  10   1   2    1.86    1.00
  11  -1   2   45.99    2.38
 -11  -1  -2   50.48    3.36
 -11  -1  -2   42.67    2.98
  11  -1   2   46.31    3.34
  11   1   2   49.09    4.13
  11   1   2   44.53    2.45
 -11   1  -2   46.36    3.00
  12  -1   2  124.46    5.44
  12  -1   2  115.06    5.43
 -12  -1  -2  122.19    6.63
  12  -1   2  112.99    6.35
 -12  -1  -2  111.54    6.18
 -12   1  -2  127.96    6.30
  12   1   2  121.49    5.64
  12   1   2  118.66    5.51
  13  -1   2   54.58    2.81
  13  -1   2   50.52    2.60
  13  -1   2   52.15    2.59
  13  -1   2   54.45    2.78
 -13   1  -2   52.59    3.50
  13   1   2   49.98    2.92
  13   1   2   51.82    2.95
  13   1   2   49.42    2.92
  13   1   2   55.06    2.88
  14  -1   2   64.93    3.28
  14  -1   2   65.75    3.03
  14  -1   2   63.98    3.30
  14  -1   2   62.37    3.01
  14  -1   2   59.79    4.10
  14   1   2   63.08    3.44
  14   1   2   68.21    3.44
  14   1   2   64.65    3.31
 -14   1  -2   55.30    3.99
  14   1   2   63.15    3.50
  14   1   2   64.38    3.39
  14   1   2   63.79    3.52
 -15  -1  -2   -0.54    1.09
  15  -1   2    0.50    0.32
  15  -1   2   -1.51    1.00
  15  -1   2    0.07    0.35
 -15  -1  -2    0.73    0.88
  15  -1   2    0.55    0.46
  15  -1   2   -0.11    0.41
  15   1   2    0.73    0.70
  15   1   2    0.43    0.46
 -15   1  -2    0.17    0.83
  15   1   2   -0.16    0.56
  15   1   2    0.31    0.65
  15   1   2    0.39    0.57
  15   1   2   -0.24    0.49
 -16  -1  -2   73.48    3.94
  16  -1   2   78.37    3.80
  16  -1   2   74.19    3.96
  16  -1   2   69.40    3.69
  16   1   2   72.94    3.86
  16   1   2   73.37    3.72
  16   1   2   72.23    4.07
  16   1   2   71.63    3.75
  16   1   2   73.46    3.87
  16   1   2   74.16    3.79
 -17  -1  -2    0.88    0.68
  17  -1   2    0.20    0.39
  17  -1   2   -0.27    0.44
 -17  -1  -2    1.13    0.69
  17  -1   2    0.04    0.65
  17   1   2    0.22    0.48
  17   1   2    0.42    0.49
  17   1   2    0.03    0.42
  17   1   2    0.72    0.60
  17   1   2    0.29    0.58
  17   1   2    1.82    0.69
  18  -1   2   79.28    3.93
 -18  -1  -2   74.17    3.94
 -18  -1  -2   75.59    3.92
  18   1   2   77.87    3.63
  18   1   2   76.52    3.92
  18   1   2   78.01    3.59
 -18   1  -2   77.79    4.04
  18   1   2   81.31    4.02
  19  -1   2    1.18    0.65
  19  -1   2    1.51    0.51
 -19  -1  -2    0.49    0.51
 -19  -1  -2    1.06    0.59
  19   1   2    0.27    0.44
  19   1   2    2.24    0.60
 -19   1  -2   -0.03    0.61
  20  -1   2   63.53    3.15
 -20  -1  -2   61.56    3.06
 -20  -1  -2   62.47    3.08
  20  -1   2   61.82    3.09
 -20   1  -2   61.75    3.12
  20   1   2   65.73    3.08
  20   1   2   63.69    3.14
 -20   1  -2   63.15    3.10
 -21  -1  -2    4.05    0.54
  21  -1   2    4.66    0.56
  21  -1   2    3.68    0.52
 -21  -1  -2    4.15    0.54
 -21   1  -2    5.35    0.64
  21   1   2    4.02    0.50
  21  -2  -2   21.90    1.32
 -21  -2   2   22.09    1.41
  21  -2  -2   20.63    1.37
 -21  -2   2   17.28    1.53
 -21   2   2   20.05    1.33
 -21   2   2   18.21    1.34
  20  -2  -2   15.91    1.37
  20  -2  -2   14.99    1.20
 -20  -2   2   15.75    1.61
 -20  -2   2   15.09    1.19
  20  -2  -2   17.28    1.25
 -20  -2   2   14.11    1.52
  20   2  -2   14.97    1.22
 -20   2   2   14.87    1.35
  20   2  -2   14.91    1.16
 -20   2   2   15.41    1.32
  20   2  -2   13.28    1.15
  20   2  -2   16.43    1.24
  19  -2  -2    1.08    0.70
  19  -2  -2    1.81    0.69
  19  -2  -2    1.76    0.57
 -19  -2   2    1.39    0.57
 -19  -2   2    1.48    0.63
 -19  -2   2    1.15    0.79
  19   2  -2    2.03    0.68
  19   2  -2    1.20    0.65
 -19   2   2    1.26    1.31
  19   2  -2    1.35    0.40
  19   2  -2    1.73    0.71
  19   2  -2    1.82    0.65
 -19   2   2    1.20    0.71
  18  -2  -2   34.43    2.26
  18  -2  -2   34.05    2.30
 -18  -2   2   35.22    2.27
 -18  -2   2   37.94    2.38
  18  -2  -2   36.09    2.52
 -18  -2   2   35.15    2.83
  18  -2  -2   33.90    2.37
 -18   2   2   32.86    2.40
  18   2  -2   36.24    2.26
  18   2  -2   34.92    2.46
  18   2  -2   37.49    2.43
  18   2  -2   41.11    2.44
  18   2  -2   38.21    2.38
  18   2  -2   34.44    2.16
 -17  -2   2    6.31    1.10
  17  -2  -2    9.76    1.38
  17  -2  -2    6.83    1.08
  17  -2  -2    7.90    1.21
  17  -2  -2    6.83    0.68
  17  -2  -2    6.45    1.70
  17  -2  -2    6.63    0.63
 -17  -2   2    8.76    1.23
  17   2  -2    6.76    1.04
 -17   2   2    8.51    1.41
  17   2  -2    9.37    1.31
  17   2  -2    9.84    1.37
  17   2  -2    6.70    1.15
  17   2  -2    8.09    1.21
  17   2  -2    8.65    1.36
 -16  -2   2  138.11    6.56
  16  -2  -2  143.59    6.67
  16  -2  -2  140.70    6.12
  16  -2  -2  136.03    6.80
  16  -2  -2  145.63    6.13
  16  -2  -2  137.62    5.96
  16  -2  -2  133.95    7.53
  16  -2  -2  142.32    6.68
 -16  -2   2  133.26    6.57
  16   2  -2  139.53    6.58
  16   2  -2  147.01    6.78
  16   2  -2  137.08    6.69
  16   2  -2  132.89    6.87
  16   2  -2  136.98    6.66
  16   2  -2  141.50    6.81
  15  -2  -2   22.20    2.48
  15  -2  -2   22.44    2.35
  15  -2  -2   26.08    1.58
  15  -2  -2   21.76    1.51
  15  -2  -2   23.88    1.87
  15  -2  -2   23.44    1.53
  15  -2  -2   27.80    1.92
 -15  -2   2   25.37    2.01
 -15  -2   2   26.07    2.03
  15   2  -2   25.18    1.29
  15   2  -2   23.66    2.03
  15   2  -2   27.34    2.34
  15   2  -2   25.49    2.10
  15   2  -2   25.10    2.09
 -15   2   2   27.03    2.87
  15   2  -2   25.66    2.05
  15   2  -2   25.08    1.99
  14  -2  -2   25.78    1.66
 -14  -2   2   25.83    2.08
  14  -2  -2   27.12    1.91
  14  -2  -2   25.09    1.89
  14  -2  -2   25.90    1.60
  14  -2  -2   24.67    1.55
 -14  -2   2   27.41    2.02
  14  -2  -2   24.03    2.85
 -14   2   2   25.90    2.72
  14   2  -2   20.69    2.23
  14   2  -2   24.26    1.54
  14   2  -2   23.07    2.28
  14   2  -2   26.48    1.73
  14   2  -2   25.21    2.59
  14   2  -2   24.25    2.11
  14   2  -2   22.39    2.06
  14   2  -2   22.13    2.14
 -13  -2   2   91.69    5.18
  13  -2  -2   91.40    4.69
  13  -2  -2   96.50    4.39
  13  -2  -2   93.74    4.66
  13   2  -2   95.72    4.51
  13   2  -2   98.65    4.48
 -13   2   2   92.39    5.79
 -13   2   2   87.93    5.07
  12  -2  -2    5.11    0.95
  12  -2  -2    4.93    1.62
  12  -2  -2    4.76    0.81
 -12  -2   2    3.71    0.97
  12   2  -2    3.87    0.75
  12   2  -2    5.81    2.15
 -12   2   2    5.15    1.38
 -12   2   2    4.66    1.03
  12   2  -2    4.77    0.77
 -11  -2   2  193.43    9.15
  11  -2  -2  199.84    8.67
  11  -2  -2  185.21   10.60
  11  -2  -2  202.11    8.70
 -11   2   2  216.30    9.12
  11   2  -2  191.37   11.46
 -11   2   2  190.94    9.87
  11   2  -2  195.57    8.74
  11   2  -2  191.10    8.81
  10  -2  -2    3.49    1.34
  10  -2  -2    3.65    0.68
 -10  -2   2    3.36    0.80
  10  -2  -2    4.95    0.72
 -10   2   2    3.06    1.04
  10   2  -2    4.02    0.79
  10   2  -2    4.66    1.66
 -10   2   2    3.99    0.81
  10   2  -2    4.44    0.83
   9  -2  -2  199.20    8.43
   9  -2  -2  203.63    8.59
   9  -2  -2  199.79   10.54
  -9  -2   2  196.99    8.86
   9   2  -2  194.60   10.69
   9   2  -2  198.68    8.54
  -9   2   2  172.20    8.61
  -9   2   2  206.76    9.52
   8  -2  -2    5.00    1.52
   8  -2  -2    5.91    1.54
  -8  -2   2    6.79    0.87
   8  -2  -2    6.50    0.62
  -8  -2   2    5.50    3.27
   8  -2  -2    6.65    0.72
   8   2  -2    8.98    1.53
   8   2  -2    7.36    0.86
  -8   2   2    7.19    1.25
  -8   2   2    5.98    0.76
  -7  -2   2   76.39    4.83
  -7  -2   2   73.73    3.53
   7  -2  -2   72.17    4.82
  -7  -2   2   71.54    6.76
   7  -2  -2   66.62    3.13
   7  -2  -2   69.22    3.38
  -7   2   2   62.65    3.32
   7   2  -2   70.13    3.43
  -7   2   2   69.32    3.83
   7   2  -2   70.53    4.75
  -6  -2   2  192.79    8.49
   6  -2  -2  195.64   10.66
  -6  -2   2  187.36    9.69
   6  -2  -2  202.01   10.04
   6  -2  -2  200.68    8.17
  -6  -2   2  199.44   12.23
  -6  -2   2  209.23    8.53
   6  -2  -2  194.18    8.48
  -6   2   2  199.58    8.79
  -6   2   2  176.79    8.33
   6   2  -2  192.68    8.71
   6   2  -2  192.75    9.81
   6   2  -2  191.92    8.54
  -5  -2   2    2.22    0.49
  -5  -2   2    1.70    0.74
  -5  -2   2    2.09    0.47
   5  -2  -2    1.12    0.88
  -5  -2   2    2.58    0.80
   5  -2  -2    1.46    0.78
  -5  -2   2    3.51    1.61
  -5  -2   2    1.84    1.27
   5  -2  -2    2.53    1.15
   5  -2  -2    1.95    0.52
  -5   2   2    1.71    0.54
   5   2  -2    1.94    0.50
   5   2  -2    2.30    1.41
  -5   2   2    2.23    0.43
   5   2  -2    1.87    0.53
   5   2  -2    2.29    0.89
  -5   2   2    1.39    1.40
  -4  -2   2  166.33   10.53
  -4  -2   2  149.10    7.13
   4  -2  -2  157.76    7.46
   4  -2  -2  179.60    8.72
  -4  -2   2  165.75    9.95
  -4  -2   2  176.69    8.19
   4  -2  -2  162.21    9.63
  -4  -2   2  157.01    7.23
   4  -2  -2  172.79    7.04
   4   2  -2  176.99    7.43
  -4   2   2  152.79    7.39
   4   2  -2  185.50   10.48
  -4   2   2  176.10    9.12
   4   2  -2  154.26    8.21
  -4   2   2  177.76    7.21
  -4   2   2  166.97   11.50
   4   2  -2  171.38    7.47
  -4   2   2  176.14    7.47
  -3  -2   2    1.83    0.63
   3  -2  -2    1.60    0.56
   3  -2  -2    1.80    1.20
   3  -2  -2    2.32    1.14
   3  -2  -2    2.05    0.34
   3  -2  -2    1.44    0.98
  -3  -2   2    1.67    0.99
  -3  -2   2    2.19    0.22
  -3  -2   2    1.24    0.35
  -3  -2   2    1.59    1.15
   3  -2  -2    1.34    0.76
   3   2  -2    1.52    1.06
  -3   2   2    2.21    0.45
   3   2  -2    2.08    0.48
  -3   2   2    1.76    0.37
  -3   2   2    1.40    0.81
  -3   2   2    2.36    0.51
  -3   2   2    1.68    1.58
   3   2  -2    2.42    0.51
   2  -2  -2  321.34   16.01
  -2  -2   2  337.26   14.07
   2  -2  -2  393.04   18.36
   2  -2  -2  303.79   16.54
  -2  -2   2  300.07   14.65
   2  -2  -2  338.01   15.35
  -2  -2   2  336.18   16.85
   2  -2  -2  319.45   14.32
   2   2  -2  315.68   14.18
   2   2  -2  370.98   14.23
   2   2  -2  371.90   16.76
  -2   2   2  365.52   18.00
  -2   2   2  375.57   19.82
  -2   2   2  294.13   14.10
  -2   2   2  342.32   14.23
  -2   2   2  330.99   15.57
  -2   2   2  361.90   14.32
  -1  -2   2  145.42    6.37
   1  -2  -2  145.13    6.61
   1  -2  -2  155.91    6.23
  -1  -2   2  147.58    8.56
   1  -2  -2  129.02    8.58
  -1  -2   2  154.20    6.94
   1  -2  -2  168.24   10.75
   1  -2  -2  147.75    7.56
   1   2  -2  169.43    8.87
  -1   2   2  152.14   10.79
  -1   2   2  159.55    9.59
   1   2  -2  140.79    6.45
  -1   2   2  135.02    6.56
  -1   2   2  148.43    6.54
  -1   2   2  156.97    6.55
   1   2  -2  154.83    6.40
   0  -2   2    3.38    0.39
   0  -2   2    1.73    0.65
   0  -2   2    2.61    1.08
   0  -2   2    2.84    0.53
   0  -2  -2    1.71    0.31
   0  -2  -2    2.74    1.71
   0  -2  -2    2.74    1.32
   0  -2  -2    5.46    1.16
   0  -2  -2    2.24    0.52
   0   2  -2    2.81    0.99
   0   2   2    2.52    0.46
   0   2   2    3.16    0.48
   0   2  -2    2.78    0.34
   0   2   2    2.04    1.32
   0   2   2    2.87    0.53
   0   2   2    2.58    1.67
   0   2  -2    2.55    1.03
   1  -2   2  109.09    4.47
   1  -2   2   91.70    4.09
  -1  -2  -2   96.33    4.26
  -1  -2  -2  101.00    6.83
  -1  -2  -2   89.22    4.35
   1  -2   2   97.14    4.72
  -1  -2  -2   93.80    7.55
  -1  -2  -2   94.72    5.33
   1   2   2   90.25    4.40
   1   2   2  103.20    7.67
  -1   2  -2  101.78    5.90
   1   2   2   92.49    6.80
   1   2   2   93.18    4.33
   1   2   2   86.26    4.31
  -1   2  -2   96.01    4.04
  -2  -2  -2    5.38    2.12
   2  -2   2    5.26    0.45
  -2  -2  -2    6.54    0.98
  -2  -2  -2    5.25    0.61
  -2  -2  -2    5.75    1.70
  -2  -2  -2    5.49    1.02
   2  -2   2    5.54    0.53
  -2   2  -2    6.44    1.37
   2   2   2    6.95    1.81
   2   2   2    5.66    0.60
   2   2   2    5.80    2.09
   2   2   2    4.91    0.59
   2   2   2    5.18    0.69
  -3  -2  -2  333.78   13.26
  -3  -2  -2  311.86   16.65
   3  -2   2  309.61   12.91
  -3  -2  -2  316.52   17.36
  -3  -2  -2  309.11   13.57
   3  -2   2  301.14   12.98
  -3  -2  -2  298.61   14.38
   3   2   2  291.09   13.76
   3   2   2  299.92   13.19
   3   2   2  297.52   13.14
   3   2   2  353.85   17.58
   3   2   2  344.92   17.07
  -3   2  -2  314.82   15.26
  -4  -2  -2   23.38    1.87
   4  -2   2   30.12    1.31
  -4  -2  -2   27.30    1.68
  -4  -2  -2   34.20    2.72
  -4  -2  -2   31.69    4.94
  -4  -2  -2   28.38    3.80
   4   2   2   27.80    3.87
   4   2   2   27.20    1.64
  -4   2  -2   30.02    2.93
   4   2   2   28.50    3.75
  -5  -2  -2  229.15    9.91
   5  -2   2  230.87    9.38
  -5  -2  -2  231.58   13.87
  -5  -2  -2  229.43   10.30
   5   2   2  222.81    9.80
  -5   2  -2  223.49   11.89
  -6  -2  -2   61.65    3.56
  -6  -2  -2   59.48    3.19
  -6  -2  -2   64.32    7.72
  -6   2  -2   61.32    2.78
   6   2   2   59.01    2.88
   6   2   2   62.41    3.08
  -7  -2  -2   93.81    4.79
  -7  -2  -2   87.04    4.33
   7   2   2   79.57    3.90
   7   2   2   89.34    5.62
   7   2   2   86.83    4.09
  -7   2  -2   79.58    4.04
  -8  -2  -2  135.86    6.62
  -8  -2  -2  149.88    7.18
   8   2   2  138.32    6.17
  -8   2  -2  130.53    6.43
   8   2   2  131.88    6.25
   8   2   2  157.67    8.43
  -9  -2  -2   19.54    1.68
   9  -2   2   17.12    1.07
  -9  -2  -2   19.36    1.99
  -9   2  -2   19.06    1.55
   9   2   2   19.65    1.30
   9   2   2   19.87    1.30
   9   2   2   17.34    2.40
 -10  -2  -2  223.03   10.13
  10  -2   2  201.45    8.56
 -10  -2  -2  197.38    9.39
  10   2   2  191.29   10.97
 -10   2  -2  199.39    9.25
  10   2   2  198.36    8.61
  10   2   2  192.91    8.75
  11  -2   2    4.06    0.62
  11  -2   2    5.20    0.73
 -11  -2  -2    4.35    1.10
 -11  -2  -2    3.41    1.17
 -11   2  -2    6.01    1.14
  11   2   2    3.79    0.57
  11   2   2    4.98    0.84
  11   2   2    4.22    1.59
 -12  -2  -2   32.30    2.76
 -12  -2  -2   37.59    3.33
  12  -2   2   37.51    2.06
  12  -2   2   40.65    2.11
 -12   2  -2   41.06    2.78
  12   2   2   35.17    2.44
  12   2   2   38.72    2.28
  12   2   2   34.82    1.73
  13  -2   2   65.57    3.18
 -13  -2  -2   57.64    3.45
  13  -2   2   64.42    3.16
  13   2   2   57.11    3.48
  13   2   2   62.12    3.53
 -13   2  -2   63.53    3.94
  13   2   2   64.13    3.69
  13   2   2   60.16    3.48
  13   2   2   62.43    3.37
  14  -2   2    7.33    1.53
 -14  -2  -2    7.74    1.15
 -14  -2  -2    5.68    1.10
  14  -2   2    6.21    0.87
  14  -2   2    5.53    0.80
  14   2   2    6.57    1.16
  14   2   2    6.52    1.09
  14   2   2    7.72    1.28
  14   2   2    5.72    1.13
  14   2   2    5.11    1.06
 -14   2  -2    3.71    1.12
  14   2   2    5.49    1.24
  14   2   2    6.53    1.15
  15  -2   2   42.06    2.35
 -15  -2  -2   42.72    2.62
  15  -2   2   38.16    3.04
 -15  -2  -2   39.84    2.63
  15  -2   2   41.81    2.39
  15   2   2   39.01    2.56
  15   2   2   43.35    2.65
  15   2   2   40.95    2.74
  15   2   2   43.75    2.58
  15   2   2   42.15    2.74
  15   2   2   40.15    2.53
  15   2   2   40.93    2.70
 -16  -2  -2    0.43    0.76
  16  -2   2    0.90    0.49
  16  -2   2    1.25    0.47
  16  -2   2    1.42    1.11
 -16  -2  -2    0.93    0.69
  16   2   2    2.28    0.78
  16   2   2    1.50    0.69
  16   2   2    1.13    0.61
  16   2   2    2.46    0.78
  16   2   2    0.72    0.70
  16   2   2    1.49    0.70
  17  -2   2   96.69    4.66
  17  -2   2   96.78    4.80
 -17  -2  -2   96.65    4.83
 -17  -2  -2  101.04    4.82
  17  -2   2   98.18    4.68
  17   2   2  101.03    4.90
  17   2   2   98.36    4.80
  17   2   2   97.94    4.81
  17   2   2  101.10    4.86
  17   2   2   94.84    4.83
  18  -2   2   -0.17    0.47
 -18  -2  -2    0.12    0.47
  18  -2   2   -0.03    0.31
 -18  -2  -2    0.65    0.52
  18   2   2   -0.07    0.54
  18   2   2    0.55    0.45
  18   2   2    0.43    0.46
  18   2   2    0.91    0.52
  18   2   2    0.23    0.44
  19  -2   2   42.67    2.22
 -19  -2  -2   39.44    2.22
 -19  -2  -2   40.30    2.20
  19   2   2   38.88    2.19
  19   2   2   41.19    2.26
  19   2   2   37.58    1.88
 -19   2  -2   40.70    2.32
 -20  -2  -2   12.91    0.95
  20  -2   2   12.47    0.98
 -20  -2  -2   12.57    0.96
  20   2   2   13.40    0.97
 -20   2  -2   11.69    1.07
  21  -3  -2   41.23    2.06
  21  -3  -2   38.66    1.98
 -21  -3   2   48.88    3.40
 -21   3   2   37.69    2.02
  20  -3  -2    1.31    0.46
 -20  -3   2    1.11    0.60
  20  -3  -2    0.44    0.37
  20  -3  -2    0.81    0.35
 -20  -3   2    1.05    0.85
 -20   3   2    1.40    0.52
  20   3  -2    1.33    0.56
 -20   3   2    0.61    0.45
  20   3  -2    1.49    0.53
  20   3  -2    0.98    0.50
 -19  -3   2  144.65    7.60
  19  -3  -2  140.04    6.52
 -19  -3   2  135.53    6.99
 -19  -3   2  146.17    6.18
  19  -3  -2  140.97    6.47
  19  -3  -2  145.51    6.45
 -19   3   2  144.00    6.48
  19   3  -2  141.70    6.68
  19   3  -2  149.23    6.66
  19   3  -2  136.73    6.63
  19   3  -2  144.02    6.27
  18  -3  -2    6.24    0.89
 -18  -3   2    6.76    0.83
  18  -3  -2    7.76    1.44
  18  -3  -2    6.85    1.01
 -18  -3   2    7.26    1.38
  18  -3  -2    7.29    1.15
  18   3  -2    5.79    1.14
 -18   3   2    7.04    1.10
  18   3  -2    5.63    0.94
  18   3  -2    6.58    0.83
  18   3  -2    7.35    1.29
  18   3  -2    9.80    1.33
  17  -3  -2  114.63    5.46
 -17  -3   2  111.33    6.17
  17  -3  -2  116.54    5.61
 -17  -3   2  117.07    5.29
 -17  -3   2  115.19    5.33
  17  -3  -2  110.43    6.19
  17  -3  -2  110.33    5.49
  17   3  -2  106.83    5.68
  17   3  -2  111.47    5.88
  17   3  -2  117.36    5.34
  17   3  -2  112.82    5.63
  17   3  -2  114.03    5.83
  16  -3  -2    0.28    0.57
  16  -3  -2    1.30    0.95
 -16  -3   2    0.68    0.91
 -16  -3   2    1.20    0.60
 -16  -3   2    0.03    0.63
  16  -3  -2    0.33    0.45
  16  -3  -2    0.13    0.83
  16   3  -2    1.28    0.69
  16   3  -2    1.08    0.92
  16   3  -2    1.06    0.93
  16   3  -2    1.00    0.93
  16   3  -2    1.00    0.79
  15  -3  -2   92.44    4.01
  15  -3  -2   89.14    4.63
 -15  -3   2   94.12    5.42
  15  -3  -2   86.71    5.42
  15  -3  -2   91.70    3.97
  15  -3  -2   81.01    4.52
 -15  -3   2   98.76    4.55
 -15  -3   2   97.34    4.57
  15  -3  -2   85.33    4.80
  15   3  -2   92.21    4.32
  15   3  -2   92.24    4.26
  15   3  -2   90.48    4.58
  15   3  -2   82.85    5.12
  15   3  -2   89.88    4.97
 -14  -3   2   21.44    2.22
  14  -3  -2   21.42    1.28
  14  -3  -2   21.75    1.70
  14  -3  -2   19.86    1.64
  14  -3  -2   21.84    1.30
  14  -3  -2   20.77    1.12
 -14  -3   2   23.12    1.82
  14  -3  -2   20.43    2.50
 -14  -3   2   22.34    1.74
  14   3  -2   23.11    2.27
  14   3  -2   20.88    1.77
  14   3  -2   22.56    1.58
  14   3  -2   20.62    1.77
 -14   3   2   20.25    2.58
 -13  -3   2   40.19    2.46
  13  -3  -2   40.11    2.05
 -13  -3   2   54.48    4.91
  13  -3  -2   29.78    4.62
  13  -3  -2   38.85    2.07
  13  -3  -2   40.79    2.45
 -13  -3   2   36.15    2.40
  13  -3  -2   38.44    2.07
  13  -3  -2   41.63    2.55
 -13   3   2   41.04    3.49
  13   3  -2   40.59    2.42
  13   3  -2   40.34    2.72
  12  -3  -2   13.94    1.09
  12  -3  -2   14.53    1.41
  12  -3  -2   14.96    1.32
 -12   3   2   14.69    1.62
 -12   3   2   16.74    2.21
  12   3  -2   16.65    1.56
  12   3  -2   17.58    1.44
  11  -3  -2    6.77    0.94
  11  -3  -2    6.16    1.03
  11  -3  -2    7.17    0.80
  11  -3  -2    5.36    1.40
  11   3  -2    6.69    1.12
 -11   3   2    6.60    1.58
  11   3  -2    6.53    1.00
 -11   3   2    5.03    1.09
  10  -3  -2    1.21    0.46
  10  -3  -2    0.98    0.86
  10  -3  -2    1.17    0.42
 -10   3   2    1.82    0.93
 -10   3   2    0.55    0.50
  10   3  -2    1.56    0.61
   9  -3  -2   31.68    2.96
   9  -3  -2   34.45    1.89
   9  -3  -2   37.48    2.08
   9   3  -2   33.83    2.29
  -9   3   2   34.85    2.74
  -9   3   2   35.35    2.22
   8  -3  -2    2.17    1.00
   8  -3  -2    2.83    0.50
   8  -3  -2    2.36    0.54
  -8   3   2    3.78    0.97
  -8   3   2    2.32    0.60
  -7  -3   2  204.12   10.73
   7  -3  -2  199.34   10.15
  -7  -3   2  186.93   13.53
   7  -3  -2  190.91    8.44
   7  -3  -2  208.38    8.82
   7   3  -2  211.11    9.05
  -7   3   2  182.06    9.19
  -7   3   2  211.06    8.82
  -6  -3   2   14.00    1.91
   6  -3  -2   13.99    0.86
   6  -3  -2   14.13    1.15
   6  -3  -2   16.81    1.95
  -6  -3   2   12.81    1.17
  -6  -3   2   10.94    2.78
   6  -3  -2   10.68    1.84
  -6   3   2   13.48    1.08
  -6   3   2   12.65    1.27
   6   3  -2   15.24    1.42
   6   3  -2   15.63    1.32
  -5  -3   2  353.01   16.51
   5  -3  -2  408.14   16.70
  -5  -3   2  349.80   15.16
  -5  -3   2  325.66   19.04
   5  -3  -2  343.40   15.25
   5   3  -2  374.55   15.41
   5   3  -2  356.22   15.43
  -5   3   2  341.41   15.05
  -5   3   2  362.12   15.42
  -4  -3   2    7.49    2.07
  -4  -3   2    9.30    1.39
   4  -3  -2    8.13    1.35
   4  -3  -2    6.43    1.63
  -4  -3   2    9.68    0.89
   4  -3  -2    9.90    1.11
   4   3  -2   10.38    1.04
  -4   3   2    7.72    0.80
   4   3  -2    9.72    1.00
  -4   3   2   10.79    1.04
  -3  -3   2  293.68   14.08
  -3  -3   2  311.55   13.10
   3  -3  -2  299.37   13.32
   3  -3  -2  339.68   14.61
   3   3  -2  316.62   13.35
  -3   3   2  282.76   13.24
   3   3  -2  319.26   13.30
  -2  -3   2   22.55    1.37
  -2  -3   2   16.96    2.54
   2  -3  -2   25.67    2.37
   2  -3  -2   19.05    1.50
  -2  -3   2   25.97    2.07
  -2   3   2   23.74    1.48
   2   3  -2   21.04    1.45
  -2   3   2   21.62    1.53
   2   3  -2   23.22    3.62
   2   3  -2   21.75    1.52
  -2   3   2   25.46    4.72
  -1  -3   2  107.89    5.00
   1  -3  -2  131.62    6.65
  -1  -3   2  107.06    5.74
  -1  -3   2  120.83    8.47
   1  -3  -2  105.06    5.23
   1   3  -2  103.20    5.09
  -1   3   2  108.43    5.19
  -1   3   2  114.26    5.29
   1   3  -2  113.87    5.17
  -1   3   2  106.27    9.75
  -1   3   2  121.17    5.28
   0  -3   2   19.92    2.14
   0  -3   2   20.49    2.81
   0  -3   2   18.76    1.58
   0  -3  -2   19.33    2.12
   0  -3  -2   15.98    2.77
   0  -3  -2   17.67    1.35
   0  -3   2   18.72    1.18
   0   3  -2   18.14    2.87
   0   3  -2   19.09    1.22
   0   3   2   16.46    1.30
   0   3   2   19.24    1.42
   0   3  -2   22.38    1.23
   0   3   2   19.00    3.90
   0   3   2   18.94    1.33
   1  -3   2  126.14    6.53
   1  -3   2  123.83    6.06
  -1  -3  -2  114.73    8.47
  -1  -3  -2  118.50    6.86
  -1  -3  -2  117.75    5.62
   1  -3   2  128.41    5.91
   1  -3   2  111.22    5.32
  -1   3  -2  117.66    5.36
   1   3   2  117.30   10.07
   1   3   2  106.89    5.63
  -1   3  -2  129.79    8.45
   1   3   2  132.38    5.65
   1   3   2  136.84    5.74
  -2  -3  -2    8.71    1.55
   2  -3   2    7.47    1.20
   2  -3   2    6.86    0.66
  -2  -3  -2    6.20    2.00
  -2  -3  -2    6.77    0.96
  -2  -3  -2    4.74    0.58
   2  -3   2    6.71    0.81
  -2   3  -2    8.11    0.63
   2   3   2    7.56    0.93
   2   3   2    9.30    2.83
   2   3   2    6.88    0.80
   2   3   2    8.09    0.88
   3  -3   2   18.57    1.50
  -3  -3  -2   19.24    3.35
  -3  -3  -2   18.78    1.26
  -3  -3  -2   16.91    1.36
  -3  -3  -2   18.12    2.24
   3  -3   2   18.94    1.16
   3  -3   2   19.17    1.30
   3   3   2   18.43    3.84
   3   3   2   18.05    1.35
   3   3   2   16.18    1.43
   3   3   2   18.96    1.38
  -3   3  -2   18.15    1.06
   4  -3   2   23.33    1.22
  -4  -3  -2   23.07    1.52
   4  -3   2   19.56    1.26
  -4  -3  -2   23.17    2.61
   4  -3   2   25.82    1.44
  -4  -3  -2   21.70    3.76
   4   3   2   20.45    4.17
   4   3   2   22.75    1.52
   4   3   2   21.83    1.56
  -4   3  -2   21.10    1.20
   5  -3   2  139.00    5.63
  -5  -3  -2  132.31    6.15
  -5  -3  -2  139.69   10.70
  -5   3  -2  121.59    5.73
   5   3   2  133.83    6.19
   6  -3   2    6.41    0.45
  -6  -3  -2    6.85    0.95
   6   3   2    6.50    0.85
  -6   3  -2    7.04    0.68
  -7  -3  -2  190.07    8.88
  -7   3  -2  194.74    8.61
   7   3   2  201.64    8.83
  -8  -3  -2   35.64    2.40
  -8   3  -2   36.15    2.28
   8   3   2   32.18    2.00
   8   3   2   35.83    2.24
   8   3   2   35.46    3.85
  -9  -3  -2  211.14    9.69
   9  -3   2  224.16    8.81
   9   3   2  179.40    9.18
   9   3   2  217.99    9.37
   9   3   2  187.69   11.79
  -9   3  -2  216.39    9.59
  10  -3   2    4.00    0.62
  10  -3   2    3.80    0.63
 -10  -3  -2    3.61    1.05
  10   3   2    2.33    0.66
  10   3   2    3.49    0.75
  10   3   2    3.47    1.82
 -10   3  -2    4.91    1.01
 -11  -3  -2  173.35    8.66
  11  -3   2  175.55    7.72
  11  -3   2  177.19    7.74
  11   3   2  181.45    7.87
 -11   3  -2  183.16    8.56
  11   3   2  169.78    7.87
  12  -3   2    8.36    0.87
 -12  -3  -2   10.80    1.36
 -12  -3  -2    9.23    1.30
  12  -3   2    9.32    0.90
  12   3   2   10.23    1.52
  12   3   2    6.77    1.72
  12   3   2    8.56    0.90
  12   3   2    9.25    1.11
 -12   3  -2    9.75    1.40
  12   3   2    8.85    1.53
  12   3   2    8.48    1.51
  13  -3   2   51.43    3.65
  13  -3   2   49.35    2.64
 -13  -3  -2   51.54    2.96
  13  -3   2   54.49    2.71
 -13  -3  -2   51.92    2.96
 -13   3  -2   42.09    3.28
  13   3   2   43.89    3.11
  13   3   2   49.39    2.38
  13   3   2   55.10    3.29
  13   3   2   50.77    3.34
  13   3   2   53.50    3.01
  13   3   2   56.73    3.00
  13   3   2   49.57    3.45
 -14  -3  -2    0.95    0.66
 -14  -3  -2    0.09    0.60
  14  -3   2    0.22    0.40
  14  -3   2    0.18    0.32
  14  -3   2    1.54    0.99
  14   3   2    2.00    0.68
  14   3   2   -0.04    0.79
  14   3   2    1.58    0.81
  14   3   2   -0.03    0.74
  14   3   2   -0.08    0.77
  14   3   2    0.39    0.92
 -15  -3  -2   40.09    2.50
  15  -3   2   42.32    2.29
 -15  -3  -2   37.66    2.46
  15  -3   2   43.68    2.34
  15  -3   2   39.81    3.10
  15   3   2   36.16    2.69
  15   3   2   42.12    2.92
  15   3   2   42.83    2.82
  15   3   2   43.03    2.74
  15   3   2   40.70    2.52
  15   3   2   41.48    2.61
  16  -3   2    3.62    0.70
  16  -3   2    2.84    0.55
 -16  -3  -2    3.64    0.78
  16  -3   2    2.93    0.94
 -16  -3  -2    3.66    0.82
  16   3   2    1.99    0.73
  16   3   2    3.35    0.86
  16   3   2    2.14    0.83
  16   3   2    1.94    0.95
  16   3   2    3.23    1.01
  16   3   2    3.36    0.80
  17  -3   2    0.36    0.79
 -17  -3  -2    0.66    0.46
  17  -3   2    0.71    0.34
 -17  -3  -2    0.10    0.50
  17   3   2    0.55    0.47
  17   3   2    1.18    0.67
  17   3   2   -0.17    0.67
  17   3   2    0.58    0.58
  17   3   2   -0.11    0.56
  17   3   2    0.40    0.53
 -18  -3  -2   11.39    1.02
  18  -3   2   11.29    0.86
 -18  -3  -2   10.21    1.02
  18  -3   2   10.27    1.05
  18   3   2   10.00    1.15
  18   3   2   10.76    1.05
  18   3   2   10.03    1.12
  18   3   2   10.98    1.21
 -19  -3  -2   40.72    2.03
  19  -3   2   39.77    2.09
  19   3   2   40.01    2.04
  19   3   2   37.06    1.94
  20  -3   2    6.96    0.68
  20  -3   2    7.31    0.80
  20  -4  -2    4.93    0.57
 -20  -4   2    3.61    0.81
 -20  -4   2    3.38    1.04
  20  -4  -2    4.47    0.55
  20   4  -2    3.01    0.61
  20   4  -2    5.38    0.69
 -20   4   2    4.43    0.57
  19  -4  -2    2.10    0.45
 -19  -4   2    3.37    0.87
  19  -4  -2    3.97    0.66
 -19  -4   2    2.45    0.83
 -19  -4   2    4.23    1.05
  19  -4  -2    3.90    0.63
  19   4  -2    1.53    0.69
 -19   4   2    4.21    0.65
  19   4  -2    3.41    0.81
  19   4  -2    2.37    0.54
  19   4  -2    2.68    0.77
  18  -4  -2    5.02    0.93
  18  -4  -2    3.20    0.58
  18  -4  -2    5.53    1.09
 -18  -4   2    3.27    0.96
 -18  -4   2    3.69    0.98
 -18  -4   2    5.11    1.34
  18  -4  -2    4.91    0.77
  18   4  -2    5.13    1.08
  18   4  -2    4.07    1.05
 -18   4   2    4.31    0.81
  18   4  -2    4.36    0.86
  18   4  -2    3.79    1.03
  17  -4  -2   11.64    1.59
  17  -4  -2   11.17    1.03
 -17  -4   2   11.47    1.65
 -17  -4   2   12.52    2.08
 -17  -4   2   11.67    1.63
  17  -4  -2   12.08    1.31
  17   4  -2   12.37    1.46
  17   4  -2    9.54    1.56
  17   4  -2   13.24    1.74
  17   4  -2   13.22    1.64
  16  -4  -2    5.32    1.00
 -16  -4   2    4.95    1.53
 -16  -4   2    6.07    1.38
 -16  -4   2    7.11    1.44
  16  -4  -2    5.34    1.30
  16  -4  -2    5.48    0.85
  16  -4  -2    5.44    0.90
  16   4  -2    5.43    1.21
  16   4  -2    4.82    0.49
  16   4  -2    6.62    1.58
  15  -4  -2   44.85    3.44
 -15  -4   2   47.28    3.92
  15  -4  -2   44.01    2.97
 -15  -4   2   49.60    3.44
  15  -4  -2   49.06    2.80
  15  -4  -2   49.34    2.84
 -15  -4   2   48.57    3.60
 -15  -4   2   51.74    2.58
  15   4  -2   54.64    3.43
  15   4  -2   49.46    2.67
  15   4  -2   49.68    2.83
 -14  -4   2    9.87    2.07
  14  -4  -2    6.30    1.54
 -14  -4   2    2.74    1.13
  14  -4  -2    5.45    0.93
  14  -4  -2    5.55    0.90
 -14  -4   2    5.87    0.78
 -14  -4   2    8.13    1.67
  14   4  -2    4.75    1.00
  14   4  -2    5.51    1.53
  14   4  -2    3.90    0.80
 -13  -4   2  130.82    6.62
  13  -4  -2  124.86    5.30
  13  -4  -2  128.12    5.99
  13  -4  -2  123.90    5.25
  13  -4  -2  124.79    5.91
 -13  -4   2  126.71    5.65
  13  -4  -2  116.50    6.68
 -13  -4   2  117.84    7.14
 -13  -4   2  127.67    6.81
  13   4  -2  127.64    6.04
 -13   4   2  115.73    7.08
  13   4  -2  128.44    6.47
  12  -4  -2    2.32    0.65
 -12  -4   2    2.59    1.12
  12  -4  -2    2.03    1.26
 -12  -4   2    4.43    1.63
  12  -4  -2    1.55    0.58
  12  -4  -2    2.47    0.48
  12  -4  -2    2.98    1.14
  12  -4  -2    2.36    0.44
 -12  -4   2    2.96    0.68
 -12  -4   2    2.94    1.02
 -12   4   2    1.28    1.02
  12   4  -2    0.76    0.62
  12   4  -2    3.94    1.12
 -11  -4   2  120.48    5.28
 -11  -4   2  113.60    6.04
  11  -4  -2  116.54    5.45
  11  -4  -2  111.43    5.59
  11  -4  -2  119.95    5.36
  11  -4  -2  126.63    6.55
 -11   4   2  114.48    6.66
 -11   4   2  104.77    5.99
  11   4  -2  118.62    5.78
  11   4  -2  119.79    6.10
 -10  -4   2    1.31    0.89
  10  -4  -2    0.21    0.36
  10  -4  -2   -0.27    0.39
  10  -4  -2    0.60    0.33
  10  -4  -2    0.41    0.41
 -10   4   2    0.88    0.69
  10   4  -2    0.71    0.64
 -10   4   2    0.62    0.64
  10   4  -2    0.79    0.66
   9  -4  -2  193.05    8.28
   9  -4  -2  191.41    8.37
   9  -4  -2  196.02    8.17
  -9  -4   2  174.06    8.67
  -9   4   2  187.59    9.30
   9   4  -2  196.93    8.93
  -9   4   2  168.77    8.63
   8  -4  -2    3.13    1.07
   8  -4  -2    3.21    0.59
   8  -4  -2    4.28    0.73
  -8   4   2    4.79    0.95
  -8   4   2    2.88    0.98
   8   4  -2    5.80    1.19
  -7  -4   2  111.99    7.32
   7  -4  -2  106.76    6.33
   7  -4  -2  114.42    5.25
   7  -4  -2  104.03    4.86
   7   4  -2  110.16    5.58
  -7   4   2  105.93    5.71
  -7   4   2  112.68    5.42
   7   4  -2  108.23    5.62
  -6  -4   2   49.14    2.81
   6  -4  -2   46.50    2.67
   6  -4  -2   42.18    3.45
   6  -4  -2   45.99    2.25
  -6  -4   2   46.29    4.03
   6   4  -2   45.74    2.95
  -6   4   2   43.25    2.90
  -6   4   2   46.02    2.70
  -5  -4   2    4.74    0.89
   5  -4  -2    5.07    0.92
  -5  -4   2    5.74    1.55
   5  -4  -2    4.16    1.23
  -5   4   2    4.23    0.83
   5   4  -2    5.99    1.10
  -5   4   2    3.88    0.91
   5   4  -2    6.68    1.18
   4  -4  -2    9.77    1.63
   4  -4  -2    8.95    1.28
  -4  -4   2    7.58    1.72
  -4  -4   2   12.35    1.11
  -4   4   2    9.91    1.06
  -4   4   2    8.15    1.12
  -4   4   2    9.67    1.07
   4   4  -2    8.40    1.15
   4   4  -2    8.60    1.14
   3  -4  -2   17.13    1.46
   3  -4  -2   14.52    1.94
  -3  -4   2   16.11    1.92
  -3  -4   2    9.31    3.97
  -3  -4   2   16.68    1.30
  -3   4   2   18.75    1.55
  -3   4   2   15.32    1.35
   3   4  -2   14.79    1.49
   3   4  -2   16.24    1.44
   2  -4  -2    6.99    1.93
  -2  -4   2    9.96    1.00
  -2  -4   2   13.23    1.67
   2  -4  -2   11.92    1.75
  -2  -4   2    7.79    2.03
   2  -4  -2   10.44    1.19
  -2   4   2   12.30    1.16
   2   4  -2   10.65    1.23
   2   4  -2   10.85    1.12
  -2   4   2   11.09    1.18
  -1  -4   2   13.87    1.16
   1  -4  -2    9.70    2.34
  -1  -4   2   12.28    2.22
   1  -4  -2   15.50    1.37
  -1  -4   2   16.53    1.75
   1  -4  -2   15.24    2.03
  -1   4   2   14.05    1.36
   1   4  -2   15.83    1.30
   1   4  -2   16.15    1.45
  -1   4   2   15.76    1.37
   0  -4  -2   64.02    6.32
   0  -4   2   64.71    4.22
   0  -4   2   61.90    4.87
   0  -4  -2   73.56    3.85
   0  -4   2   77.00    3.63
   0   4  -2   77.60    3.74
   0   4  -2   82.24    3.94
   0   4   2   82.97    4.03
   1  -4   2  143.39    7.55
  -1  -4  -2  140.36    8.72
   1  -4   2  158.00    7.12
  -1  -4  -2  159.54    7.43
   1   4   2  176.53    7.64
  -1   4  -2  165.70    7.25
  -1   4  -2  170.76    7.25
   1   4   2  161.15    7.48
   2  -4   2    0.51    0.48
  -2  -4  -2    1.04    0.97
  -2  -4  -2    0.62    0.53
   2  -4   2    1.54    0.48
  -2  -4  -2    0.18    1.19
   2   4   2    0.33    0.50
   2   4   2    0.97    0.53
   2   4   2    0.25    0.44
  -2   4  -2    0.56    0.37
   3  -4   2  366.77   18.08
  -3  -4  -2  428.61   18.28
   3  -4   2  451.48   17.83
  -3  -4  -2  434.52   23.70
  -3  -4  -2  454.91   20.59
  -3   4  -2  381.89   17.83
   3   4   2  428.85   18.25
   3   4   2  458.91   18.29
   4  -4   2    1.31    0.43
  -4  -4  -2    1.34    1.07
   4  -4   2    1.47    0.41
  -4  -4  -2    1.32    1.69
   4   4   2    2.83    0.68
   4   4   2    0.75    0.53
  -4   4  -2    2.48    0.56
   5  -4   2  309.50   12.87
  -5   4  -2  323.44   13.30
   5   4   2  302.27   13.46
   5   4   2  297.95   13.57
   6  -4   2   20.46    1.05
   6   4   2   17.53    1.61
  -6   4  -2   20.80    1.51
   7   4   2   75.92    4.09
  -7   4  -2   71.95    3.88
   8  -4   2   10.37    0.94
   8   4   2   12.58    1.32
   8   4   2   12.79    1.41
  -8   4  -2   12.97    1.31
   9  -4   2    5.52    0.56
   9  -4   2    6.31    0.76
  -9   4  -2    4.54    1.00
   9   4   2    6.04    1.03
   9   4   2    4.38    0.96
  10  -4   2    0.27    0.33
 -10  -4  -2    0.86    0.62
  10  -4   2    1.00    0.34
 -10  -4  -2    0.05    0.65
 -10   4  -2    1.33    0.67
  10   4   2    0.99    1.27
  10   4   2    0.94    0.60
  10   4   2    0.03    0.50
  11  -4   2    8.36    0.82
  11  -4   2    9.53    0.87
 -11  -4  -2    9.77    1.22
 -11  -4  -2    6.58    0.99
  11  -4   2    8.88    1.66
  11   4   2    8.12    1.09
 -11   4  -2    7.05    1.31
  11   4   2    8.81    1.15
  11   4   2    6.46    1.30
  11   4   2    7.73    1.28
  11   4   2    7.86    1.72
  12  -4   2    4.48    0.72
  12  -4   2    3.68    0.61
 -12  -4  -2    3.29    0.84
  12  -4   2    5.56    1.36
 -12  -4  -2    4.91    0.89
  12   4   2    5.07    1.47
 -12   4  -2    3.41    1.01
  12   4   2    3.41    0.89
  12   4   2    4.78    0.94
  12   4   2    3.29    0.69
  12   4   2    7.38    1.40
 -13  -4  -2   24.71    1.78
  13  -4   2   24.66    2.41
  13  -4   2   23.93    1.55
 -13  -4  -2   24.16    1.82
  13  -4   2   25.60    1.62
  13   4   2   28.41    2.61
  13   4   2   26.50    1.89
  13   4   2   25.51    1.58
  13   4   2   25.51    2.37
  13   4   2   24.36    1.59
  14  -4   2   19.48    1.31
  14  -4   2   20.19    2.07
 -14  -4  -2   19.18    1.57
 -14  -4  -2   19.90    1.55
  14  -4   2   21.18    1.42
  14   4   2   20.23    2.20
  14   4   2   20.89    2.34
  14   4   2   18.60    1.60
  14   4   2   17.41    1.99
  14   4   2   23.39    2.53
 -15  -4  -2   77.79    4.01
  15  -4   2   81.31    4.68
  15  -4   2   82.66    3.89
 -15  -4  -2   80.40    4.02
  15   4   2   87.16    4.07
  15   4   2   83.07    4.47
  15   4   2   83.29    4.55
  15   4   2   84.78    4.65
  15   4   2   84.24    4.85
  16  -4   2   -0.01    0.25
 -16  -4  -2   -0.04    0.45
 -16  -4  -2    1.56    0.89
  16  -4   2    0.10    0.61
  16   4   2    0.69    0.69
  16   4   2   -0.32    0.81
  16   4   2    0.59    0.74
  16   4   2    0.35    0.49
  16   4   2   -0.20    0.61
 -17  -4  -2  119.17    5.33
  17  -4   2  118.87    5.32
 -17  -4  -2  110.70    6.68
  17  -4   2  125.84    5.98
  17   4   2  121.11    5.89
  17   4   2  126.37    5.50
  17   4   2  120.15    5.89
  17   4   2  127.03    5.87
 -18  -4  -2   -0.20    0.71
  18  -4   2    0.45    0.22
  18  -4   2    0.22    0.36
  18   4   2   -0.10    0.53
  18   4   2    1.00    0.49
 -19  -4  -2   56.90    3.41
  19  -4   2   60.84    2.78
 -19  -5   2   46.22    2.51
  19  -5  -2   53.01    2.43
  19  -5  -2   51.68    2.38
  19   5  -2   48.72    2.66
  18  -5  -2    1.29    0.58
 -18  -5   2    1.42    0.67
  18  -5  -2    2.72    0.63
  18  -5  -2    2.55    0.50
  18  -5  -2    1.43    0.35
 -18  -5   2    1.41    0.63
 -18   5   2    2.07    0.53
  18   5  -2    2.59    0.90
  18   5  -2    2.97    0.86
  18   5  -2    3.08    0.90
  18   5  -2    3.15    0.69
  17  -5  -2   54.54    2.80
  17  -5  -2   59.57    2.95
 -17  -5   2   57.08    3.28
 -17  -5   2   61.11    3.68
 -17  -5   2   56.10    3.47
  17  -5  -2   59.00    3.35
  17   5  -2   55.09    3.60
  17   5  -2   49.96    3.22
 -17   5   2   56.87    2.95
 -16  -5   2   18.32    1.91
 -16  -5   2   16.73    1.95
  16  -5  -2   17.81    1.81
 -16  -5   2   15.90    1.68
  16  -5  -2   15.79    1.21
  16  -5  -2   15.43    1.34
  16   5  -2   15.77    1.83
 -15  -5   2   27.33    2.63
 -15  -5   2   23.90    2.42
  15  -5  -2   29.36    1.95
  15  -5  -2   18.36    1.98
  15  -5  -2   26.96    1.72
 -15  -5   2   25.81    2.18
  15  -5  -2   25.89    2.27
  15   5  -2   27.43    2.49
  15   5  -2   26.64    1.81
  15   5  -2   25.15    1.66
 -14  -5   2   34.63    2.57
  14  -5  -2   25.88    2.10
 -14  -5   2   31.25    2.97
 -14  -5   2   32.41    2.80
  14  -5  -2   30.79    2.64
  14  -5  -2   33.05    2.05
  14  -5  -2   31.92    2.03
  14   5  -2   32.96    2.40
  14   5  -2   33.71    2.14
 -13  -5   2    9.06    1.47
  13  -5  -2    5.87    0.94
 -13  -5   2    8.24    1.80
 -13  -5   2    7.37    1.52
  13  -5  -2    7.36    1.04
  13  -5  -2    8.79    1.63
  13  -5  -2    9.19    1.58
  13   5  -2    7.91    1.32
  13   5  -2    7.18    1.11
  13   5  -2    7.90    1.39
 -12  -5   2   42.02    2.91
  12  -5  -2   39.23    2.32
 -12  -5   2   39.20    3.20
  12  -5  -2   39.75    3.08
  12  -5  -2   41.26    3.08
 -12  -5   2   37.10    3.34
  12  -5  -2   34.01    2.34
  12   5  -2   41.42    3.05
  12   5  -2   37.11    2.58
  12   5  -2   40.19    2.85
  11  -5  -2    4.86    0.86
  11  -5  -2    4.70    0.43
  11  -5  -2    4.59    1.34
  11  -5  -2    5.16    1.36
 -11  -5   2    4.96    1.44
  11  -5  -2    3.86    0.60
  11  -5  -2    4.82    0.81
 -11  -5   2    5.62    1.14
 -11  -5   2    5.41    1.61
  11   5  -2    5.62    1.08
  11   5  -2    5.26    1.36
 -11   5   2    2.98    1.24
  11   5  -2    4.68    1.14
  10  -5  -2   43.68    2.06
  10  -5  -2   43.20    2.39
 -10  -5   2   40.64    3.36
 -10  -5   2   34.75    3.19
 -10  -5   2   40.90    2.85
  10  -5  -2   40.83    2.24
  10  -5  -2   43.93    2.52
  10  -5  -2   44.33    3.09
  10  -5  -2   41.86    3.22
 -10   5   2   36.49    3.23
  10   5  -2   44.32    2.90
  10   5  -2   40.09    2.86
  10   5  -2   38.53    3.26
   9  -5  -2   18.58    1.33
   9  -5  -2   16.20    1.16
  -9  -5   2   17.20    2.18
  -9  -5   2   14.87    1.78
   9  -5  -2   17.79    1.44
  -9  -5   2   18.78    1.78
   9  -5  -2   18.90    1.32
   9  -5  -2   18.21    1.97
   9   5  -2   17.03    1.86
   9   5  -2   17.95    1.40
  -9   5   2   18.00    2.08
   9   5  -2   17.22    2.24
  -8  -5   2   64.10    3.72
   8  -5  -2   64.19    3.42
   8  -5  -2   65.38    3.39
   8  -5  -2   67.64    3.28
   8  -5  -2   62.49    3.15
  -8   5   2   67.68    4.05
  -8   5   2   67.43    4.29
  -8   5   2   64.60    4.02
   7  -5  -2  180.77    7.71
   7  -5  -2  176.79    7.59
   7  -5  -2  167.15    7.37
   7  -5  -2  164.26    7.35
  -7  -5   2  171.85    7.83
   7   5  -2  145.83    8.20
  -7   5   2  170.78    8.46
  -7   5   2  163.31    8.14
   6  -5  -2   22.49    1.45
  -6  -5   2   26.23    2.13
  -6  -5   2   21.06    3.07
   6  -5  -2   27.98    1.72
   6  -5  -2   27.19    1.90
  -6  -5   2   25.08    1.81
   6  -5  -2   22.92    2.45
   6   5  -2   22.63    2.19
  -6   5   2   26.14    2.23
  -6   5   2   23.05    2.05
  -5  -5   2  229.80   10.44
   5  -5  -2  229.58    9.86
   5  -5  -2  229.06   10.26
   5  -5  -2  220.01   11.44
  -5  -5   2  228.13   12.24
  -5   5   2  222.08   10.46
   5   5  -2  231.93   10.85
   5   5  -2  215.14   11.55
  -5   5   2  227.98   10.72
   4  -5  -2    1.85    0.99
  -4  -5   2    1.11    0.64
   4  -5  -2    1.26    0.73
  -4  -5   2    2.49    1.19
   4   5  -2    2.38    0.95
  -4   5   2    1.64    0.70
  -4   5   2    1.43    0.67
   4   5  -2    2.00    0.79
  -3  -5   2  133.07    7.76
   3  -5  -2  131.44    7.70
  -3  -5   2  134.46    6.40
   3  -5  -2  128.11    6.51
   3   5  -2  131.79    6.70
  -3   5   2  154.88    6.95
  -3   5   2  115.09    6.50
   3   5  -2  126.06    6.90
   2  -5  -2    3.41    0.92
  -2  -5   2    3.39    1.17
  -2  -5   2    3.40    0.82
   2  -5  -2    3.38    1.30
   2   5  -2    3.58    1.07
   2   5  -2    2.54    0.82
  -2   5   2    3.27    0.83
  -2   5   2    4.32    1.04
  -1  -5   2   66.91    3.63
   1  -5  -2   67.99    5.08
  -1  -5   2   54.91    4.27
   1  -5  -2   71.82    3.94
  -1   5   2   72.76    4.09
   1   5  -2   66.19    4.12
   1   5  -2   74.80    3.96
  -1   5   2   62.69    3.89
   0  -5  -2   69.44    5.34
   0  -5   2   75.71    3.85
   0  -5   2   77.24    4.69
   0  -5  -2   72.90    4.09
   0   5   2   67.71    4.17
   0   5  -2   67.10    3.96
   0   5   2   73.90    4.22
   0   5  -2   70.67    4.26
  -1  -5  -2   35.19    2.56
  -1  -5  -2   38.09    3.78
   1  -5   2   36.41    2.30
   1  -5   2   31.95    2.72
  -1   5  -2   39.21    2.53
   1   5   2   43.83    2.89
   1   5   2   34.51    2.64
  -1   5  -2   37.02    2.65
   2  -5   2  154.64    7.51
   2  -5   2  148.65    6.88
  -2  -5  -2  154.70    7.38
  -2  -5  -2  141.49    9.13
  -2   5  -2  152.10    7.37
   2   5   2  150.59    8.44
   2   5   2  133.00    7.27
  -2   5  -2  151.82    7.13
   3  -5   2    0.52    0.48
  -3  -5  -2    1.12    0.73
   3  -5   2    1.15    0.48
  -3  -5  -2    1.80    1.42
   3   5   2    1.09    0.69
  -3   5  -2    1.11    0.55
   4  -5   2   78.00    3.66
   4  -5   2   78.32    3.79
   4  -5   2   74.72    3.54
  -4   5  -2   72.11    4.07
   4   5   2   72.81    4.28
   5  -5   2   46.79    2.52
   5  -5   2   56.10    2.52
   5   5   2   51.37    3.33
  -5   5  -2   47.94    3.04
   6  -5   2   25.34    1.24
   6  -5   2   24.44    1.49
   6   5   2   26.77    2.22
  -6   5  -2   22.70    1.93
   7  -5   2   71.10    3.36
  -7  -5  -2   68.77    4.02
   7   5   2   67.45    4.12
  -7   5  -2   67.12    3.96
   7   5   2   70.78    3.92
   8  -5   2    4.35    1.18
   8  -5   2    3.76    0.66
  -8  -5  -2    5.81    1.26
  -8  -5  -2    4.46    0.76
   8   5   2    2.54    0.83
  -8   5  -2    3.99    0.97
   8   5   2    6.25    1.23
   9  -5   2   71.38    4.44
  -9  -5  -2   71.04    3.42
  -9  -5  -2   71.05    4.30
   9  -5   2   73.02    3.51
  -9  -5  -2   72.05    4.97
   9  -5   2   72.85    3.40
   9  -5   2   67.20    4.31
  -9   5  -2   68.00    4.18
   9   5   2   70.00    4.10
   9   5   2   73.87    3.99
   9   5   2   74.77    4.48
 -10  -5  -2    1.66    1.26
  10  -5   2    3.44    1.20
  10  -5   2    2.30    0.54
  10  -5   2    2.47    0.53
 -10  -5  -2    2.69    0.65
 -10  -5  -2    1.41    0.98
  10  -5   2    3.12    1.14
  10   5   2    1.61    0.99
  10   5   2    2.04    0.69
  10   5   2    2.28    0.95
 -10   5  -2    1.30    0.74
 -11  -5  -2   78.96    4.70
 -11  -5  -2   79.93    3.72
 -11  -5  -2   79.00    5.31
  11  -5   2   78.27    4.70
  11  -5   2   74.46    3.71
  11  -5   2   79.58    3.78
  11   5   2   75.69    4.09
  11   5   2   76.08    4.46
  11   5   2   78.67    4.50
 -12  -5  -2    0.92    1.09
  12  -5   2    1.01    0.82
  12  -5   2    1.50    0.49
  12  -5   2    0.39    0.36
 -12  -5  -2   -0.41    0.79
  12   5   2    0.10    1.24
  12   5   2    0.36    0.47
  12   5   2    0.65    0.59
  12   5   2    1.63    0.85
  13  -5   2   49.65    3.32
 -13  -5  -2   46.55    3.85
 -13  -5  -2   51.22    3.47
 -13  -5  -2   52.59    2.53
  13  -5   2   49.11    2.53
  13  -5   2   48.30    2.60
  13   5   2   48.98    2.62
  13   5   2   51.08    2.72
  13   5   2   49.80    3.47
  13   5   2   48.16    3.26
  14  -5   2   16.40    1.10
 -14  -5  -2   16.09    2.32
  14  -5   2   16.27    1.74
  14  -5   2   16.53    1.24
 -14  -5  -2   20.96    1.99
  14   5   2   15.07    1.76
  14   5   2   15.44    2.09
  14   5   2   17.78    2.01
  15  -5   2   10.27    1.35
  15  -5   2   11.46    0.83
 -15  -5  -2   11.83    1.83
  15   5   2   11.07    1.40
  15   5   2   12.64    1.63
  15   5   2   10.91    1.61
  15   5   2    9.66    1.56
 -16  -5  -2   53.26    3.56
  16  -5   2   53.11    2.42
  16  -5   2   53.52    3.03
  16   5   2   49.65    2.88
  16   5   2   49.18    3.16
  16   5   2   47.10    3.18
  17  -5   2    4.21    0.59
  17  -5   2    3.19    0.70
  17  -5   2    4.58    0.39
 -17  -5  -2    4.65    1.00
  17   5   2    4.04    0.84
  17   5   2    1.72    0.77
  17   5   2    4.19    0.59
  18  -5   2   24.23    1.32
 -18  -5  -2   23.15    1.75
  18   5   2   24.21    1.45
 -17  -6   2    9.99    1.20
  17  -6  -2    8.62    0.77
  17  -6  -2    8.87    0.99
  17  -6  -2   10.91    0.90
  17   6  -2    8.89    1.03
 -17   6   2    9.25    0.88
  17   6  -2    6.57    1.13
  16  -6  -2   43.05    2.22
  16  -6  -2   41.13    2.53
 -16  -6   2   40.75    2.14
  16  -6  -2   38.75    2.07
 -16  -6   2   40.55    2.72
  16  -6  -2   42.39    2.26
 -16   6   2   41.63    2.23
  16   6  -2   41.88    2.68
  15  -6  -2    1.82    0.68
 -15  -6   2    2.78    0.94
 -15  -6   2    2.92    0.70
  15  -6  -2    2.51    0.51
  15  -6  -2    2.03    0.56
  15   6  -2    2.44    0.42
  15   6  -2    2.47    0.49
  15   6  -2    2.93    1.08
  14  -6  -2   32.24    2.49
 -14  -6   2   32.13    2.71
  14  -6  -2   34.08    1.97
  14  -6  -2   33.70    2.04
 -14  -6   2   34.22    2.41
  14  -6  -2   33.64    2.50
  14   6  -2   32.28    2.06
  14   6  -2   30.51    2.22
  14   6  -2   35.39    2.51
  13  -6  -2   12.52    1.24
 -13  -6   2    8.65    1.33
  13  -6  -2    9.10    1.44
 -13  -6   2    9.82    1.73
  13  -6  -2    8.88    1.04
  13  -6  -2   11.43    1.62
  13  -6  -2    9.75    1.49
  13   6  -2    7.73    1.28
  13   6  -2    8.70    1.20
  13   6  -2    8.35    1.33
  12  -6  -2    3.83    0.72
  12  -6  -2    3.62    0.70
  12  -6  -2    4.25    1.05
  12  -6  -2    3.84    1.08
 -12  -6   2    6.16    1.28
 -12  -6   2    3.46    1.18
  12  -6  -2    5.42    0.95
  12   6  -2    4.13    1.00
  12   6  -2    4.45    1.17
  12   6  -2    4.18    0.95
  11  -6  -2   20.02    1.49
 -11  -6   2   16.49    2.21
  11  -6  -2   19.76    1.53
 -11  -6   2   19.69    1.97
  11  -6  -2   19.37    2.10
 -11  -6   2   18.10    2.39
  11  -6  -2   17.93    2.06
  11   6  -2   22.79    2.04
  11   6  -2   21.12    2.26
  11   6  -2   18.86    1.81
  10  -6  -2   11.32    1.30
  10  -6  -2   12.29    1.76
  10  -6  -2   16.95    2.15
  10  -6  -2   14.76    1.15
 -10  -6   2   12.14    1.98
 -10  -6   2   12.16    1.71
 -10  -6   2   10.78    2.01
  10   6  -2   12.32    1.66
  10   6  -2   11.62    1.61
  10   6  -2   15.55    2.28
   9  -6  -2   17.59    1.97
   9  -6  -2   16.71    2.10
  -9  -6   2   17.87    1.84
   9  -6  -2   17.40    1.36
  -9  -6   2   18.90    1.38
  -9  -6   2   19.05    2.35
   9  -6  -2   16.19    1.22
   9  -6  -2   16.74    1.45
   9  -6  -2   17.56    0.96
  -9  -6   2   18.29    2.35
   9   6  -2   17.33    1.97
   9   6  -2   16.44    1.35
   8  -6  -2   72.15    4.31
   8  -6  -2   69.12    3.56
   8  -6  -2   60.32    3.51
  -8  -6   2   69.20    4.63
   8  -6  -2   77.61    4.62
  -8  -6   2   74.09    3.62
  -8  -6   2   73.21    4.43
   8  -6  -2   68.34    3.72
  -8  -6   2   76.88    4.07
   8  -6  -2   73.54    3.33
   8   6  -2   71.90    4.13
   8   6  -2   71.95    3.56
  -8   6   2   76.92    4.80
   7  -6  -2   20.46    2.28
  -7  -6   2   21.49    1.61
   7  -6  -2   21.39    1.60
   7  -6  -2   17.82    1.91
   7  -6  -2   19.09    1.53
   7  -6  -2   18.53    1.42
   7  -6  -2   18.54    1.32
  -7  -6   2   23.97    2.57
  -7  -6   2   21.42    2.40
  -7  -6   2   22.31    2.43
  -7  -6   2   20.62    1.70
  -7  -6   2   20.37    1.88
   7   6  -2   22.77    1.98
  -7   6   2   19.52    2.30
   7   6  -2   19.99    1.57
   6  -6  -2  125.87    5.75
   6  -6  -2  132.37    5.79
   6  -6  -2  131.69    6.56
  -6  -6   2  123.16    5.58
   6  -6  -2  133.95    6.00
  -6  -6   2  134.62    6.82
   6  -6  -2  119.77    5.99
  -6  -6   2  130.91    6.47
  -6  -6   2  121.99    5.79
  -6  -6   2  128.05    5.74
  -6  -6   2  122.19    6.23
  -6  -6   2  119.61    6.44
   6  -6  -2  125.90    6.74
  -6  -6   2  118.52    6.92
  -6   6   2  120.89    6.84
   6   6  -2  114.64    5.73
  -5  -6   2    0.97    0.73
  -5  -6   2    0.77    0.72
  -5  -6   2    0.51    0.91
   5  -6  -2    0.61    0.46
   5  -6  -2    1.02    0.82
   5  -6  -2    1.42    0.59
   5  -6  -2    0.22    0.36
   5  -6  -2   -0.08    0.52
  -5  -6   2    1.86    0.93
   5   6  -2    1.49    0.64
  -5   6   2    0.51    0.75
   4  -6  -2   81.82    4.14
  -4  -6   2   86.63    4.77
   4  -6  -2   81.45    4.26
  -4  -6   2   81.09    4.43
   4  -6  -2   82.43    4.64
   4  -6  -2   84.90    4.57
   4  -6  -2   83.35    3.97
  -4  -6   2   78.70    4.53
  -4   6   2   79.27    5.00
   4   6  -2   82.82    4.11
   3  -6  -2   11.71    1.19
  -3  -6   2   12.76    1.77
   3  -6  -2    9.46    1.46
  -3  -6   2   15.13    1.30
   3  -6  -2   11.99    1.66
   3  -6  -2   12.35    1.59
  -3  -6   2   12.74    1.72
  -3  -6   2   14.28    1.76
  -3   6   2   10.00    2.45
  -3   6   2   12.72    1.77
   3   6  -2   10.62    1.83
   2  -6  -2   81.15    4.10
   2  -6  -2   84.74    4.69
  -2  -6   2   78.64    4.33
  -2  -6   2   84.99    4.58
  -2  -6   2   85.42    4.08
   2  -6  -2   81.72    4.43
  -2   6   2   71.52    4.75
   2   6  -2   78.34    4.90
   2   6  -2   78.06    5.21
  -2   6   2   88.89    5.12
  -1  -6   2    2.16    0.86
  -1  -6   2    2.30    0.82
   1  -6  -2    3.64    0.83
  -1  -6   2    3.47    0.72
   1  -6  -2    3.90    1.16
   1  -6  -2    2.20    0.94
  -1   6   2    3.74    1.08
   1   6  -2    3.99    1.15
  -1   6   2    3.44    1.19
   1   6  -2    3.81    1.20
   0  -6  -2   85.32    4.07
   0  -6   2   71.89    4.20
   0  -6   2   81.63    3.89
   0  -6   2   80.15    4.12
   0  -6  -2   77.10    4.41
   0  -6  -2   81.83    4.65
   0   6  -2   71.23    4.84
   0   6  -2   84.16    4.76
   0   6   2   76.58    4.75
   0   6   2   71.85    4.82
   1  -6   2   23.24    1.82
  -1  -6  -2   23.70    2.19
   1  -6   2   22.68    1.85
   1  -6   2   22.88    1.56
  -1  -6  -2   20.86    2.17
   1   6   2   22.48    2.31
  -1   6  -2   23.76    2.46
  -1   6  -2   24.53    2.19
  -2  -6  -2   42.97    3.23
  -2  -6  -2   46.73    3.39
   2  -6   2   49.60    3.32
   2  -6   2   46.44    2.77
   2  -6   2   46.40    2.57
   2  -6   2   45.89    2.51
   2   6   2   46.69    2.60
  -2   6  -2   47.15    3.22
  -2   6  -2   43.38    3.47
   2   6   2   46.60    3.41
   3  -6   2   31.17    2.02
  -3  -6  -2   29.61    2.67
   3  -6   2   31.16    1.87
   3  -6   2   29.69    1.79
   3  -6   2   29.82    2.47
  -3   6  -2   34.20    2.55
   3   6   2   28.07    2.30
   3   6   2   34.04    2.02
  -4  -6  -2    0.45    0.68
   4  -6   2    0.10    0.34
   4  -6   2    0.15    0.35
   4  -6   2    0.82    0.42
   4  -6   2    0.48    0.79
   4   6   2    0.44    0.53
   4   6   2    0.14    0.74
  -4   6  -2    0.39    0.55
  -5  -6  -2   35.79    2.69
   5  -6   2   31.41    1.94
  -5  -6  -2   30.03    3.09
  -5  -6  -2   32.45    2.07
   5  -6   2   34.77    1.72
   5  -6   2   36.55    2.69
   5  -6   2   33.25    2.75
  -5   6  -2   31.73    2.61
   5   6   2   33.82    2.05
   5   6   2   34.17    2.48
  -6  -6  -2   62.05    3.87
  -6  -6  -2   62.05    3.04
  -6  -6  -2   57.51    4.16
   6  -6   2   58.33    3.71
   6  -6   2   58.08    3.00
   6  -6   2   57.63    3.86
  -6   6  -2   54.35    3.69
   6   6   2   53.33    3.47
   6   6   2   58.08    2.94
  -7  -6  -2    7.28    1.46
  -7  -6  -2    9.58    2.13
   7  -6   2    7.76    1.55
   7  -6   2    8.71    1.51
   7  -6   2    7.09    0.90
  -7   6  -2    8.08    1.45
   7   6   2    8.52    1.43
   7   6   2    6.54    1.69
   7   6   2    9.67    1.42
  -8  -6  -2  100.38    5.85
   8  -6   2  101.25    4.75
   8  -6   2  106.56    5.85
   8  -6   2  107.04    4.88
   8  -6   2   99.73    5.63
   8   6   2  104.70    6.00
   8   6   2  104.82    5.42
   8   6   2  101.51    5.45
   9  -6   2    1.64    0.52
   9  -6   2    0.67    0.82
  -9  -6  -2    0.64    0.89
   9  -6   2    1.20    0.45
   9  -6   2    2.86    1.10
   9   6   2    1.50    0.92
   9   6   2    0.82    0.64
   9   6   2    0.76    0.68
 -10  -6  -2   75.74    4.78
  10  -6   2   74.65    3.64
  10  -6   2   81.08    4.54
  10  -6   2   73.35    3.65
  10  -6   2   67.73    4.38
  10   6   2   77.90    4.15
  10   6   2   80.02    4.44
  10   6   2   75.95    4.55
  11  -6   2    1.15    0.88
  11  -6   2    1.02    0.47
  11  -6   2    0.84    0.32
 -11  -6  -2    0.14    0.79
  11  -6   2    1.65    0.86
  11   6   2    1.32    0.58
  11   6   2    0.60    0.72
  11   6   2    0.63    0.62
  12  -6   2   57.17    3.04
 -12  -6  -2   57.81    3.92
  12  -6   2   59.78    2.87
  12  -6   2   60.19    3.63
  12   6   2   60.50    3.16
  12   6   2   55.75    3.56
  12   6   2   61.35    3.41
  12   6   2   56.28    4.01
  13  -6   2    7.34    1.12
 -13  -6  -2    6.33    1.29
  13  -6   2    8.45    0.69
  13   6   2    7.26    0.85
  13   6   2    8.00    0.78
  13   6   2   12.20    1.53
  13   6   2    7.03    1.35
 -14  -6  -2   35.53    2.59
  14  -6   2   33.79    1.73
  14  -6   2   33.99    2.30
  14   6   2   35.98    2.90
  14   6   2   35.20    2.50
  14   6   2   37.55    2.55
 -15  -6  -2   23.61    1.90
  15  -6   2   25.93    1.79
  15  -6   2   24.22    1.19
  15   6   2   22.29    2.16
  15   6   2   25.19    1.86
 -16  -6  -2    2.77    0.59
  16  -6   2    2.55    0.48
  16  -6   2    3.73    0.62
  16   6   2    3.15    0.58
  16   6   2    5.25    0.92
  15  -7  -2    1.08    0.31
  15  -7  -2    0.04    0.40
 -15  -7   2    0.25    0.53
  15  -7  -2    1.60    0.41
 -15  -7   2    0.39    0.72
  15   7  -2    0.56    0.68
 -15   7   2    0.54    0.38
 -14  -7   2   44.20    2.82
  14  -7  -2   43.87    2.37
 -14  -7   2   47.01    2.91
  14  -7  -2   45.00    2.23
  14  -7  -2   44.85    2.31
  14  -7  -2   44.79    2.63
  14  -7  -2   47.62    2.69
  14   7  -2   46.22    2.69
 -14   7   2   46.44    2.37
  14   7  -2   44.44    2.27
  14   7  -2   41.72    2.20
  13  -7  -2    1.55    0.63
  13  -7  -2    1.93    0.45
  13  -7  -2    1.50    0.73
  13  -7  -2    2.23    1.08
 -13  -7   2    2.32    0.89
 -13  -7   2    2.31    0.94
  13  -7  -2    2.25    0.51
  13   7  -2    1.95    0.59
  13   7  -2    2.24    0.65
  13   7  -2    1.85    0.75
 -13   7   2    0.98    0.65
  12  -7  -2   73.32    4.08
  12  -7  -2   73.94    3.60
 -12  -7   2   71.69    4.26
  12  -7  -2   78.23    3.62
 -12  -7   2   70.42    4.31
  12  -7  -2   67.86    4.00
  12   7  -2   73.01    3.86
  12   7  -2   71.63    4.04
  12   7  -2   72.65    4.19
  11  -7  -2    1.06    0.64
 -11  -7   2    0.63    0.91
  11  -7  -2    0.19    0.63
 -11  -7   2   -0.16    0.80
  11  -7  -2    0.88    0.50
  11  -7  -2    0.59    0.37
  11   7  -2    0.14    0.59
  11   7  -2    0.25    0.64
  11   7  -2    0.51    0.72
  10  -7  -2   98.02    5.19
  10  -7  -2   97.69    5.22
  10  -7  -2   88.92    4.52
 -10  -7   2   93.38    5.50
 -10  -7   2   96.87    5.30
  10  -7  -2   93.68    4.58
  10   7  -2   95.12    5.05
  10   7  -2   90.73    5.01
  10   7  -2   95.39    5.52
   9  -7  -2    0.56    0.48
  -9  -7   2    0.41    0.91
   9  -7  -2    1.00    0.76
   9  -7  -2    0.96    0.44
  -9  -7   2    0.85    0.99
   9  -7  -2    0.65    0.71
  -9  -7   2    0.30    1.07
   9   7  -2    0.19    0.68
   9   7  -2   -0.76    0.86
   8  -7  -2   95.51    5.25
   8  -7  -2   94.20    5.16
  -8  -7   2   99.39    5.30
  -8  -7   2   90.22    4.35
  -8  -7   2   89.88    5.14
   8  -7  -2   86.79    4.47
   8  -7  -2   97.38    4.65
  -8  -7   2   90.94    5.52
   8   7  -2   91.88    5.01
   8   7  -2   92.79    4.35
  -7  -7   2    4.26    0.77
   7  -7  -2    2.83    0.67
   7  -7  -2    2.99    0.91
   7  -7  -2    2.73    0.70
  -7  -7   2    2.30    1.20
  -7  -7   2    2.93    1.24
   7  -7  -2    2.46    0.37
  -7  -7   2    4.46    1.21
   7  -7  -2    3.93    1.20
   7   7  -2    4.15    1.05
   7   7  -2    2.26    0.61
   6  -7  -2   15.23    1.08
  -6  -7   2   15.58    1.43
   6  -7  -2   15.00    1.90
  -6  -7   2   14.96    2.01
   6  -7  -2   19.59    2.32
  -6  -7   2   12.02    1.97
   6  -7  -2   13.93    1.36
  -6  -7   2   19.66    2.17
   6   7  -2   14.82    1.33
   6   7  -2   16.36    1.76
   5  -7  -2    1.63    1.14
  -5  -7   2    2.18    0.77
   5  -7  -2    3.42    0.75
  -5  -7   2    0.64    1.00
   5  -7  -2    2.26    0.94
   5  -7  -2    3.56    0.77
   5  -7  -2    2.82    0.64
  -5  -7   2    1.77    1.00
  -5  -7   2    2.15    1.08
   5   7  -2    2.62    0.75
  -5   7   2    2.13    0.79
   5   7  -2    2.66    0.93
  -4  -7   2    6.27    1.57
  -4  -7   2    6.20    1.20
  -4  -7   2    4.15    1.18
   4  -7  -2    3.29    0.70
  -4  -7   2    5.06    0.96
   4  -7  -2    5.44    1.22
  -4  -7   2    3.59    1.11
   4  -7  -2    5.03    0.86
   4  -7  -2    4.11    0.95
   4  -7  -2    4.98    1.33
  -4  -7   2    3.72    1.07
   4  -7  -2    3.67    0.82
   4   7  -2    3.01    1.04
   4   7  -2    5.02    0.94
  -4   7   2    2.11    0.78
  -3  -7   2    2.49    0.97
   3  -7  -2    1.84    0.65
   3  -7  -2    2.85    0.68
  -3  -7   2    3.69    1.07
  -3  -7   2    1.75    0.88
   3  -7  -2    2.27    0.91
   3  -7  -2    2.72    0.82
   3  -7  -2    2.74    0.88
  -3  -7   2    1.56    0.94
  -3  -7   2    3.21    0.85
  -3  -7   2    3.28    0.91
  -3  -7   2    3.23    1.19
   3  -7  -2    1.67    0.86
  -3  -7   2    2.45    0.84
   3  -7  -2    4.76    1.30
   3   7  -2    3.01    0.85
   3   7  -2    2.99    1.00
  -3   7   2    2.66    0.77
  -2  -7   2   26.59    1.90
   2  -7  -2   21.02    1.96
   2  -7  -2   28.58    2.03
   2  -7  -2   27.55    2.39
  -2  -7   2   23.11    2.20
  -2  -7   2   27.99    2.35
  -2  -7   2   26.98    1.82
   2  -7  -2   27.84    1.97
  -2  -7   2   26.39    2.10
  -2  -7   2   29.06    2.78
   2  -7  -2   25.08    1.72
  -2  -7   2   27.02    1.97
  -2  -7   2   28.36    2.24
   2  -7  -2   26.18    2.48
   2   7  -2   26.13    2.24
  -2   7   2   25.31    1.89
   2   7  -2   19.93    2.91
   2   7  -2   23.55    1.87
   1  -7  -2    0.77    0.59
  -1  -7   2    1.73    0.90
  -1  -7   2    1.24    0.57
   1  -7  -2    0.35    0.63
   1  -7  -2    1.88    0.95
  -1  -7   2    1.13    0.72
   1  -7  -2    1.33    0.77
   1  -7  -2   -0.15    0.97
   1  -7  -2    0.83    0.82
  -1  -7   2   -0.43    0.44
  -1  -7   2   -0.27    0.66
  -1  -7   2    0.62    0.94
   1  -7  -2    1.22    0.72
  -1  -7   2    0.56    0.69
   1  -7  -2    0.67    0.44
  -1   7   2   -0.16    0.57
   1   7  -2    0.66    0.84
   1   7  -2    0.64    0.72
   0  -7  -2  122.52    5.60
   0  -7   2  116.72    5.63
   0  -7   2  116.50    6.18
   0  -7  -2  115.09    6.38
   0  -7   2  115.74    5.97
   0  -7  -2  119.48    6.13
   0  -7   2  114.37    5.65
   0  -7  -2  121.89    5.61
   0  -7  -2  108.23    6.37
   0  -7  -2  117.50    5.74
   0  -7  -2  117.34    6.11
   0  -7   2  117.55    6.58
   0   7   2  119.17    5.59
   0   7  -2  125.47    6.83
   1  -7   2   -1.08    0.70
  -1  -7  -2    1.00    1.14
  -1  -7  -2   -0.26    0.91
  -1  -7  -2    0.36    0.62
  -1  -7  -2   -0.02    0.89
   1  -7   2    0.40    0.61
   1  -7   2    0.25    0.44
  -1  -7  -2    1.06    0.85
   1  -7   2   -0.38    0.97
   1  -7   2    0.35    0.50
  -1   7  -2    0.37    0.82
   1   7   2   -0.07    0.53
   1   7   2    0.02    0.79
  -2  -7  -2   89.21    4.44
  -2  -7  -2   89.40    4.96
   2  -7   2   89.35    4.17
  -2  -7  -2   89.60    5.43
   2  -7   2   87.64    5.03
  -2  -7  -2   96.79    5.17
  -2  -7  -2   88.54    5.40
   2  -7   2   90.68    4.54
   2  -7   2   91.73    4.48
   2  -7   2   90.81    5.32
   2   7   2   91.18    4.91
   2   7   2   96.46    4.46
   3  -7   2    0.72    0.86
   3  -7   2    1.34    0.50
  -3  -7  -2    1.65    1.16
  -3  -7  -2   -1.22    1.02
  -3  -7  -2    0.99    0.99
   3  -7   2    1.21    0.80
  -3  -7  -2    1.44    0.68
   3  -7   2    1.06    0.31
   3  -7   2    0.91    0.48
  -3  -7  -2   -0.07    1.05
   3   7   2    0.99    0.78
   3   7   2    0.76    0.54
   4  -7   2  117.68    6.06
  -4  -7  -2  111.47    5.24
  -4  -7  -2  114.05    6.10
  -4  -7  -2  103.52    6.26
   4  -7   2  109.58    6.11
   4  -7   2  107.70    5.29
  -4  -7  -2  113.14    6.10
   4   7   2  113.82    5.81
   4   7   2  117.47    5.22
  -5  -7  -2    6.20    0.92
  -5  -7  -2    8.49    1.77
   5  -7   2    7.62    0.95
  -5  -7  -2    4.62    1.42
   5  -7   2    7.95    1.50
  -5  -7  -2    4.92    1.44
   5  -7   2    6.96    1.36
   5   7   2    7.60    0.90
   5   7   2    7.68    1.37
   6  -7   2   70.89    3.54
  -6  -7  -2   70.35    4.58
  -6  -7  -2   71.99    3.32
  -6  -7  -2   74.41    3.47
  -6  -7  -2   64.09    4.52
   6  -7   2   71.40    3.63
   6  -7   2   76.23    4.43
   6  -7   2   78.12    4.40
  -6  -7  -2   73.06    3.47
   6   7   2   74.75    4.17
   6   7   2   64.40    3.90
   7  -7   2   13.23    1.05
   7  -7   2   13.20    1.86
  -7  -7  -2   12.42    1.09
  -7  -7  -2   12.66    1.18
  -7  -7  -2    8.80    1.72
   7  -7   2   13.53    1.12
   7  -7   2   13.24    1.86
  -7  -7  -2   12.24    2.04
   7   7   2   13.81    1.76
   7   7   2   13.92    1.74
   7   7   2   15.82    2.25
   8  -7   2   11.83    0.98
  -8  -7  -2   10.79    1.05
   8  -7   2   10.24    1.53
   8  -7   2    8.08    1.34
   8  -7   2    8.59    0.91
  -8  -7  -2   11.16    1.16
  -8  -7  -2    8.80    1.87
   8   7   2   10.67    1.76
   8   7   2   11.20    1.52
   8   7   2    8.66    1.36
  -9  -7  -2    1.98    1.41
   9  -7   2    0.70    0.34
   9  -7   2    0.73    0.47
  -9  -7  -2    1.00    0.51
   9  -7   2    0.99    0.69
   9  -7   2    0.17    0.72
  -9  -7  -2    0.95    0.52
   9   7   2    0.33    0.66
   9   7   2    0.96    0.75
   9   7   2   -0.10    0.55
 -10  -7  -2    4.18    0.79
  10  -7   2    5.23    0.64
  10  -7   2    4.82    1.05
 -10  -7  -2    5.32    1.60
  10  -7   2    3.38    0.90
 -10  -7  -2    5.08    0.74
  10   7   2    5.82    1.11
  10   7   2    4.69    0.86
  10   7   2    5.10    1.05
  11  -7   2    0.05    0.23
 -11  -7  -2    0.18    0.39
 -11  -7  -2    0.00    1.09
 -11  -7  -2    0.58    0.41
  11  -7   2   -1.06    0.56
  11  -7   2   -0.15    0.50
  11   7   2    0.31    0.60
  11   7   2    0.08    0.46
  11   7   2    0.33    0.40
 -12  -7  -2    8.81    0.79
 -12  -7  -2    4.98    1.46
  12  -7   2    6.07    0.93
  12  -7   2    7.64    0.62
 -12  -7  -2    9.09    0.76
  12  -7   2    7.61    1.10
  12   7   2    7.79    0.81
  12   7   2    5.25    1.29
  12   7   2    7.96    0.80
  12   7   2    6.65    1.11
  13  -7   2    0.17    0.18
  13  -7   2    0.88    0.48
 -13  -7  -2    0.07    0.84
  13   7   2    1.86    0.81
  13   7   2   -0.65    0.51
  14  -7   2   43.56    2.40
  14  -7   2   45.51    2.16
 -14  -7  -2   48.54    2.81
  14   7   2   43.24    2.52
  14   7   2   42.09    2.87
  14   7   2   40.73    2.52
  13  -8  -2   25.91    1.44
  13  -8  -2   26.16    1.43
  13  -8  -2   28.30    1.65
 -13  -8   2   27.53    1.48
  12  -8  -2    1.54    0.46
  12  -8  -2    2.13    0.46
  12  -8  -2    1.20    0.53
 -12  -8   2    0.94    0.46
  12  -8  -2    1.54    0.36
 -12  -8   2    1.37    0.60
  12   8  -2    2.25    0.64
  12   8  -2    2.20    0.55
 -12   8   2    1.04    0.47
  11  -8  -2    6.98    0.98
 -11  -8   2    8.09    1.24
 -11  -8   2   10.26    1.07
  11  -8  -2   12.29    1.16
  11  -8  -2   10.72    0.92
  11  -8  -2   11.90    0.91
 -11  -8   2    7.98    1.13
  11  -8  -2   11.44    1.00
 -11   8   2   10.53    1.11
  11   8  -2   11.22    1.14
  11   8  -2   10.40    1.20
  11   8  -2   12.33    1.25
  10  -8  -2    1.47    0.40
 -10  -8   2    1.11    0.58
 -10  -8   2    2.41    0.81
  10  -8  -2    2.25    0.68
 -10  -8   2    0.54    0.69
  10  -8  -2    1.90    0.43
  10  -8  -2    0.52    0.53
  10  -8  -2    1.48    0.55
  10   8  -2    1.36    0.65
  10   8  -2    2.06    0.75
  10   8  -2    1.49    0.69
 -10   8   2    1.57    0.50
   9  -8  -2    2.48    0.69
  -9  -8   2    3.11    0.70
   9  -8  -2    3.79    0.73
   9  -8  -2    2.24    0.52
   9  -8  -2    2.10    0.72
  -9  -8   2    3.22    0.88
   9  -8  -2    3.02    0.59
  -9  -8   2    1.90    0.91
   9   8  -2    2.16    0.85
   9   8  -2    3.54    0.82
  -9   8   2    2.03    0.62
   9   8  -2    4.30    1.14
  -8  -8   2   25.05    1.77
   8  -8  -2   24.75    1.65
  -8  -8   2   27.86    2.10
   8  -8  -2   24.62    2.04
   8  -8  -2   23.60    1.71
   8  -8  -2   27.19    2.06
  -8  -8   2   21.90    2.26
  -8   8   2   26.78    1.76
   8   8  -2   24.71    1.96
   8   8  -2   25.58    2.52
   7  -8  -2    1.11    0.51
   7  -8  -2    0.01    0.64
   7  -8  -2    0.80    0.63
  -7  -8   2    1.68    0.76
  -7  -8   2   -0.03    0.80
  -7  -8   2    0.51    0.52
   7  -8  -2    0.99    0.53
  -7  -8   2    0.52    0.46
   7   8  -2    0.66    0.59
   7   8  -2    0.90    0.45
  -7   8   2    0.84    0.53
  -6  -8   2   69.98    3.41
  -6  -8   2   69.90    3.84
   6  -8  -2   65.91    3.52
  -6  -8   2   65.35    4.26
   6  -8  -2   69.84    3.61
   6  -8  -2   66.81    3.97
   6  -8  -2   72.74    4.12
  -6  -8   2   73.33    3.42
   6   8  -2   68.09    3.36
   6   8  -2   69.41    3.91
  -6   8   2   65.45    3.51
  -5  -8   2   15.25    1.35
  -5  -8   2   17.29    1.63
   5  -8  -2   15.64    1.67
  -5  -8   2   16.12    1.18
  -5  -8   2   16.36    2.17
   5  -8  -2   13.72    1.73
   5  -8  -2   19.24    1.51
   5  -8  -2   16.21    1.41
  -5   8   2   16.68    1.44
   5   8  -2   16.73    1.70
   5   8  -2   15.06    1.31
   4  -8  -2   42.12    1.98
   4  -8  -2   42.21    2.96
   4  -8  -2   37.89    2.39
  -4  -8   2   36.37    2.28
  -4  -8   2   42.50    3.13
  -4  -8   2   38.48    2.56
   4  -8  -2   42.78    2.86
   4  -8  -2   40.02    2.47
   4  -8  -2   36.87    2.58
  -4   8   2   41.04    2.39
   4   8  -2   41.89    2.35
   4   8  -2   38.14    2.69
  -3  -8   2    5.98    1.03
  -3  -8   2    8.08    0.99
  -3  -8   2    6.75    1.43
   3  -8  -2    7.27    1.26
   3  -8  -2   10.46    1.26
   3  -8  -2    3.99    1.17
   3  -8  -2    5.80    0.96
   3  -8  -2    4.94    0.74
  -3  -8   2    7.42    1.43
   3  -8  -2    6.80    0.96
  -3   8   2    6.93    0.91
   3   8  -2    6.47    1.24
   3   8  -2    7.64    1.00
   2  -8  -2   77.14    4.19
  -2  -8   2   79.39    4.02
   2  -8  -2   78.93    4.02
   2  -8  -2   80.40    3.91
   2  -8  -2   82.12    4.53
  -2  -8   2   82.71    4.19
   2  -8  -2   83.88    4.67
  -2  -8   2   78.70    3.99
  -2  -8   2   77.16    4.76
  -2   8   2   78.37    3.96
   2   8  -2   81.39    4.00
   2   8  -2   81.46    4.41
   1  -8  -2   19.03    1.96
  -1  -8   2   19.25    2.07
   1  -8  -2   16.48    1.83
  -1  -8   2   17.59    1.55
  -1  -8   2   19.03    1.93
   1  -8  -2   18.40    1.55
  -1  -8   2   18.19    1.53
  -1  -8   2   19.11    1.38
   1  -8  -2   18.83    1.67
   1   8  -2   18.22    1.48
  -1   8   2   16.46    1.38
   1   8  -2   15.03    1.76
   0  -8  -2   24.31    2.30
   0  -8   2   28.20    1.86
   0  -8  -2   26.15    1.97
   0  -8  -2   22.74    1.76
   0  -8   2   25.85    2.21
   0  -8   2   24.66    2.34
   0  -8   2   26.82    1.87
   0  -8   2   26.37    1.48
   0   8   2   23.11    1.66
   0   8  -2   24.83    1.78
   1  -8   2   11.26    1.24
   1  -8   2   12.33    1.69
   1  -8   2   10.65    1.22
  -1  -8  -2    9.38    1.36
   1  -8   2   11.47    1.66
  -1  -8  -2   10.65    1.61
  -1  -8  -2   11.46    1.19
  -1   8  -2   10.10    1.19
   1   8   2   11.50    1.12
  -2  -8  -2    2.19    1.05
   2  -8   2    1.50    0.58
  -2  -8  -2    2.00    0.65
   2  -8   2    3.27    1.06
  -2  -8  -2    2.20    0.62
   2  -8   2    2.13    0.82
  -2  -8  -2    1.13    0.76
   2  -8   2    1.23    0.52
   2   8   2    2.89    0.93
  -2   8  -2    0.69    0.65
   2   8   2    2.84    0.64
  -3  -8  -2   11.78    1.15
  -3  -8  -2   14.50    1.36
  -3  -8  -2   16.65    1.98
   3  -8   2   11.44    1.56
  -3  -8  -2    9.47    1.51
   3  -8   2   11.68    1.13
   3  -8   2   12.05    1.11
   3  -8   2   12.42    1.68
   3   8   2   14.99    1.72
  -3   8  -2    6.42    1.50
   3   8   2   12.41    1.09
   4  -8   2    6.53    1.29
  -4  -8  -2    6.94    1.06
  -4  -8  -2    6.08    1.30
   4  -8   2    6.59    0.92
  -4  -8  -2    8.23    0.85
   4  -8   2    7.84    1.00
  -4  -8  -2    2.40    1.08
   4  -8   2    6.08    1.22
   4   8   2    6.31    0.74
   4   8   2    3.76    0.96
   5  -8   2    4.75    1.04
  -5  -8  -2    8.39    1.46
  -5  -8  -2    6.04    1.07
   5  -8   2    4.36    1.05
  -5  -8  -2    3.66    1.15
   5  -8   2    5.23    0.77
   5   8   2    5.92    1.08
   6  -8   2   43.33    3.01
   6  -8   2   47.05    3.02
   6  -8   2   47.07    2.49
  -6  -8  -2   45.66    2.84
  -6  -8  -2   44.58    3.14
  -6  -8  -2   43.60    3.06
   6   8   2   46.95    3.40
   6   8   2   48.24    2.99
  -7  -8  -2    8.02    1.48
   7  -8   2    6.21    1.09
   7  -8   2    7.44    1.12
   7  -8   2    9.12    0.83
  -7  -8  -2    5.88    1.06
   7   8   2    8.79    1.29
   7   8   2    8.02    1.28
   7   8   2    8.21    1.40
   8  -8   2   44.76    2.81
  -8  -8  -2   46.97    3.13
  -8  -8  -2   42.68    2.82
   8  -8   2   47.64    2.34
   8  -8   2   48.72    2.92
   8   8   2   44.29    2.83
   8   8   2   46.01    3.06
   8   8   2   45.34    2.76
   9  -8   2    0.45    0.60
   9  -8   2    0.82    0.30
  -9  -8  -2    0.53    0.66
   9  -8   2    0.52    0.53
   9   8   2    0.68    0.54
   9   8   2    0.63    0.54
   9   8   2    0.36    0.45
  10  -8   2   63.48    3.28
  10  -8   2   59.10    2.91
 -10  -8  -2   57.85    3.28
  10  -8   2   59.15    3.30
  10   8   2   59.41    3.31
  10   8   2   59.54    3.03
  10   8   2   62.50    3.21
  11  -8   2   11.46    0.83
  11  -8   2    9.18    0.93
 -11  -8  -2    9.49    1.07
  11  -8   2    8.92    1.02
  11   8   2    6.63    0.94
 -12  -8  -2   38.20    2.09
  12  -8   2   41.83    2.10
  12  -8   2   39.79    2.07
  12   8   2   29.16    2.26
   9  -9  -2    5.51    0.85
  -9  -9   2    8.89    1.32
   9  -9  -2    9.85    0.84
   9  -9  -2    9.79    0.72
   9   9  -2    4.67    0.95
   9   9  -2    9.93    1.01
  -9   9   2    6.98    0.89
  -8  -9   2   17.19    1.42
   8  -9  -2   19.70    1.18
   8  -9  -2   18.61    1.13
   8  -9  -2   18.05    1.31
   8  -9  -2   18.59    1.38
   8   9  -2   18.96    1.42
   8   9  -2   18.66    1.63
   7  -9  -2    4.86    0.78
   7  -9  -2    7.80    0.99
   7  -9  -2    9.62    0.75
  -7  -9   2    8.43    0.80
   7  -9  -2    8.78    0.78
  -7  -9   2    8.58    1.10
  -7   9   2    8.30    0.80
   7   9  -2    7.20    0.94
   7   9  -2    8.07    1.21
   6  -9  -2    1.78    0.42
  -6  -9   2    1.80    0.44
  -6  -9   2    2.19    0.68
   6  -9  -2    2.95    0.54
   6  -9  -2    1.25    0.43
   6  -9  -2    1.41    0.53
   6  -9  -2    1.14    0.53
   6   9  -2    1.45    0.59
  -6   9   2    1.36    0.44
  -5  -9   2   11.87    0.84
  -5  -9   2   12.90    0.89
   5  -9  -2   10.88    0.96
   5  -9  -2   12.72    1.23
   5  -9  -2   10.71    0.91
   5  -9  -2   12.02    1.24
  -5  -9   2   12.47    1.37
   5   9  -2   10.74    0.85
   5   9  -2   10.41    1.23
  -5   9   2   10.24    0.97
  -4  -9   2    0.85    0.59
  -4  -9   2    0.10    0.38
  -4  -9   2   -0.16    0.25
   4  -9  -2   -0.26    0.48
   4  -9  -2   -0.30    0.34
   4  -9  -2    0.37    0.51
   4  -9  -2    0.32    0.46
   4   9  -2    0.49    0.37
  -4   9   2    0.34    0.40
   4   9  -2    0.36    0.51
   3  -9  -2   60.18    3.47
  -3  -9   2   62.39    3.65
  -3  -9   2   63.67    3.11
   3  -9  -2   59.26    3.46
   3  -9  -2   69.22    3.16
  -3   9   2   67.63    3.15
   3   9  -2   65.90    3.11
   3   9  -2   66.66    3.45
   2  -9  -2    2.41    0.67
   2  -9  -2    0.94    0.67
   2  -9  -2    2.63    0.53
  -2  -9   2    1.44    0.61
   2  -9  -2    2.62    0.77
  -2  -9   2    1.29    0.63
  -2  -9   2    2.51    0.56
   2   9  -2    3.31    0.57
  -2   9   2    2.72    0.51
  -1  -9   2   19.75    1.78
   1  -9  -2   23.72    1.87
  -1  -9   2   24.63    1.54
   1  -9  -2   22.80    1.42
  -1  -9   2   22.62    1.77
  -1  -9   2   21.49    1.60
  -1   9   2   22.45    1.41
   1   9  -2   23.69    1.48
   0  -9   2   22.23    1.59
   0  -9   2   23.01    1.78
   0  -9   2   24.03    1.56
   0  -9  -2   22.78    1.30
   0  -9  -2   25.02    1.44
   0  -9   2   21.33    1.85
   0  -9  -2   20.27    1.76
   0   9  -2   25.90    1.54
   0   9   2   23.94    1.42
  -1  -9  -2    2.90    0.46
   1  -9   2    3.85    0.82
   1  -9   2    1.42    0.66
  -1  -9  -2    3.61    0.88
   1  -9   2    4.28    0.71
   1  -9   2    3.71    0.70
  -1  -9  -2    3.89    0.56
   1   9   2    3.97    0.55
  -1   9  -2    3.01    0.59
  -2  -9  -2   34.73    1.82
  -2  -9  -2   33.00    2.29
  -2  -9  -2   34.12    1.98
   2  -9   2   37.14    2.44
   2  -9   2   39.42    2.11
   2  -9   2   35.62    2.36
   2  -9   2   38.83    2.11
   2   9   2   36.01    1.83
  -2   9  -2   35.53    2.03
  -3  -9  -2    1.63    0.66
   3  -9   2    1.10    0.45
   3  -9   2    0.85    0.58
  -3  -9  -2    0.58    0.48
   3  -9   2    0.72    0.54
   3  -9   2    0.74    0.47
  -3   9  -2    1.83    0.47
   4  -9   2   32.57    2.20
   4  -9   2   37.74    1.97
  -4  -9  -2   31.71    2.00
   4  -9   2   34.07    2.27
   4   9   2   35.11    2.20
  -4   9  -2   32.89    1.92
   4   9   2   37.91    2.70
   5  -9   2    2.95    0.56
  -5  -9  -2    1.48    0.53
   5  -9   2    2.06    0.58
   5  -9   2    2.54    0.48
   5  -9   2    2.92    0.69
   5   9   2    1.61    0.71
   5   9   2    1.36    0.62
  -5   9  -2    1.98    0.49
   6  -9   2   11.98    0.96
   6  -9   2   12.86    0.87
   6  -9   2   11.23    1.16
   6  -9   2   12.75    1.16
   6   9   2   13.29    1.40
   6   9   2   13.36    1.20
   7  -9   2   13.59    1.01
   7  -9   2   12.96    1.14
   7  -9   2   12.93    1.18
  -7  -9  -2   14.81    1.62
   7   9   2   13.85    1.18
   7   9   2   12.62    1.26
   8  -9   2    1.66    0.52
   8  -9   2    3.02    0.43
   8  -9   2    1.92    0.44
   8   9   2    2.12    0.80
   8   9   2    3.44    0.57
  22   0  -3    0.22    0.32
 -22   0   3    0.62    0.34
 -22   0   3    0.34    0.44
  21   0  -3    3.40    0.67
 -21   0   3    6.23    0.80
  21   0  -3    6.00    0.80
 -21   0   3    6.28    0.84
  20   0  -3    0.06    0.31
 -20   0   3   -0.12    0.52
  20   0  -3    0.83    0.57
 -20   0   3   -0.38    0.52
  20   0  -3    1.03    0.56
  20   0  -3    0.07    0.31
  19   0  -3    0.16    0.39
  19   0  -3    0.83    0.46
  19   0  -3    2.69    0.72
 -19   0   3    1.35    0.72
  19   0  -3    0.31    0.44
  19   0  -3    1.29    0.80
 -19   0   3    1.33    0.83
  18   0  -3   -0.17    0.44
 -18   0   3    0.31    0.73
  18   0  -3    0.42    0.29
  18   0  -3    0.43    0.79
  18   0  -3   -0.03    0.44
  18   0  -3   -0.59    0.55
  18   0  -3   -0.22    0.48
  18   0  -3   -0.09    0.62
 -18   0   3    0.45    0.75
  17   0  -3   77.32    4.41
  17   0  -3   84.49    4.15
  17   0  -3   83.23    4.18
  17   0  -3   79.61    4.34
  17   0  -3   76.03    4.17
  17   0  -3   81.95    3.93
 -17   0   3   83.91    4.47
  17   0  -3   86.79    4.56
 -17   0   3   81.99    4.40
 -16   0   3   -0.07    0.89
  16   0  -3   -0.63    0.72
  16   0  -3    1.91    1.00
  16   0  -3   -0.29    0.55
  16   0  -3    1.90    0.65
  16   0  -3    0.10    0.54
  16   0  -3   -0.54    0.59
  16   0  -3    0.74    0.66
 -16   0   3    0.22    0.85
  16   0  -3   -0.30    0.60
  15   0  -3   70.77    3.81
  15   0  -3   76.37    4.05
  15   0  -3   75.58    3.96
  15   0  -3   72.14    4.33
  15   0  -3   77.58    4.09
  15   0  -3   74.39    3.90
  15   0  -3   74.26    4.11
  15   0  -3   82.65    4.29
 -14   0   3    0.89    1.08
  14   0  -3    0.16    0.64
  14   0  -3    0.05    0.62
  14   0  -3   -0.84    0.54
 -13   0   3  225.93   11.70
  13   0  -3  234.99   10.40
 -13   0   3  235.07   10.88
  13   0  -3  237.49    9.76
  13   0  -3  238.69   10.58
 -12   0   3    0.59    0.52
 -12   0   3    0.27    0.73
  12   0  -3   -0.36    0.40
  12   0  -3    0.30    0.92
 -11   0   3  162.60    7.42
 -11   0   3  157.00    8.10
  11   0  -3  142.09    9.05
  11   0  -3  155.13    7.00
  11   0  -3  159.53    6.76
  10   0  -3   -0.01    0.33
  10   0  -3    0.11    0.66
 -10   0   3    0.32    0.60
 -10   0   3   -0.08    0.37
  -9   0   3  103.81    4.99
   9   0  -3  103.84    6.45
   9   0  -3  104.34    4.71
  -9   0   3  102.26    5.53
  -8   0   3   -0.10    0.45
  -8   0   3    0.35    0.53
  -8   0   3    0.26    0.38
   8   0  -3    0.31    0.66
   8   0  -3    0.02    0.33
   8   0  -3   -0.04    0.29
   7   0  -3    2.76    0.58
  -7   0   3    2.46    0.71
  -7   0   3    3.81    0.67
  -7   0   3    2.64    1.62
  -7   0   3    2.69    0.82
  -7   0   3    1.93    0.92
   7   0  -3    2.44    0.91
  -6   0   3   -0.57    0.40
   6   0  -3    0.75    0.24
  -6   0   3    0.13    0.40
   6   0  -3    0.46    0.91
   6   0  -3   -0.33    0.43
  -6   0   3    0.32    0.55
   6   0  -3    0.11    0.25
  -6   0   3    1.69    0.45
  -6   0   3    0.31    0.90
   5   0  -3    2.69    0.52
   5   0  -3    4.01    1.53
   5   0  -3    2.81    0.87
   5   0  -3    2.80    0.40
  -5   0   3    4.00    0.67
  -5   0   3    4.03    1.60
  -5   0   3    3.74    0.56
  -5   0   3    3.97    0.95
  -5   0   3    4.77    0.81
  -4   0   3    0.04    0.25
  -4   0   3    0.28    0.37
  -4   0   3    0.10    0.45
   4   0  -3    0.58    0.83
   4   0  -3    0.17    0.37
   4   0  -3    0.04    0.21
  -4   0   3    0.04    0.70
  -4   0   3    0.35    0.32
  -3   0   3  265.84   12.59
  -3   0   3  306.15   11.93
   3   0  -3  298.81   14.22
  -3   0   3  264.09   11.99
   3   0  -3  277.61   11.91
  -3   0   3  309.08   14.39
   3   0  -3  283.23   12.69
   2   0  -3    0.08    0.18
  -2   0   3    0.11    0.22
  -2   0   3    0.67    0.22
   2   0  -3    0.07    0.60
  -2   0   3    0.09    0.37
  -2   0   3    0.31    0.66
   2   0  -3    0.14    0.38
  -1   0   3  498.73   20.65
   1   0  -3  523.03   20.81
  -1   0   3  572.07   21.64
   1   0  -3  525.95   23.28
  -1   0   3  464.70   20.82
   1   0  -3  460.14   21.49
  -1   0   3  486.25   21.51
  -1   0   3  538.18   23.02
   0   0  -3    0.97    0.58
   0   0   3    0.03    0.49
   0   0  -3    0.25    0.86
   0   0   3   -0.04    0.62
   0   0   3    0.07    0.41
   0   0   3    0.59    0.19
   1   0   3  312.44   14.57
   1   0   3  323.15   14.25
  -1   0  -3  363.67   15.69
  -1   0  -3  327.60   15.33
   2   0   3   -0.03    0.35
  -2   0  -3   -0.03    0.62
  -2   0  -3    0.71    0.20
  -2   0  -3    0.32    0.56
  -3   0  -3  124.09    6.85
  -3   0  -3  124.16    5.38
  -3   0  -3  121.59    6.96
   3   0   3  139.91    5.91
  -4   0  -3    0.07    0.55
  -4   0  -3    0.15    0.20
   4   0   3    0.07    0.47
   4   0   3    0.29    0.34
  -5   0  -3  275.40   12.01
  -5   0  -3  296.70   14.37
   6   0   3   -0.06    0.35
   6   0   3    0.09    0.37
  -6   0  -3    0.17    0.21
   6   0   3    0.42    0.38
  -6   0  -3    0.05    0.27
  -7   0  -3   49.66    2.82
  -7   0  -3   53.26    2.65
   7   0   3   54.52    3.28
   7   0   3   52.21    2.44
   7   0   3   58.34    3.48
   8   0   3    0.75    0.23
   8   0   3    0.09    0.48
  -8   0  -3    0.10    0.38
  -8   0  -3    0.21    0.36
  -9   0  -3   40.61    2.40
   9   0   3   36.73    2.89
   9   0   3   39.18    1.99
  -9   0  -3   41.63    2.54
  10   0   3   -0.06    0.46
 -10   0  -3    0.08    0.45
  10   0   3    0.37    0.29
 -10   0  -3    0.27    0.41
  11   0   3  166.42    8.87
 -11   0  -3  166.60    8.19
  11   0   3  174.78    7.56
  11   0   3  170.60    7.63
 -11   0  -3  188.46    8.48
  12   0   3    0.39    0.36
 -12   0  -3    0.01    0.53
 -12   0  -3    0.66    0.74
  12   0   3    0.21    0.49
  12   0   3    0.72    0.42
  13   0   3  179.26    7.64
  13   0   3  163.49    7.69
  13   0   3  168.69    7.57
  13   0   3  173.06    7.65
 -13   0  -3  179.75    8.77
 -13   0  -3  166.82    9.75
  14   0   3    0.39    0.58
  14   0   3    0.27    0.37
  14   0   3    0.07    0.36
  14   0   3    0.52    0.45
 -14   0  -3    0.76    0.76
  14   0   3    0.04    0.46
  15   0   3  177.55    7.96
  15   0   3  174.11    8.02
  15   0   3  178.94    7.73
  15   0   3  183.44    7.57
  15   0   3  167.49    8.05
  15   0   3  177.57    7.73
  16   0   3    0.00    0.44
  16   0   3    0.21    0.34
  16   0   3    0.15    0.63
  16   0   3    0.65    0.41
 -17   0  -3  163.06    7.50
  17   0   3  157.15    7.36
  17   0   3  167.29    7.45
 -18   0  -3    0.69    0.59
  18   0   3    0.96    0.63
  18   0   3   -0.17    0.48
  19   0   3   36.16    2.11
 -19   0  -3   35.75    2.17
 -19   0  -3   36.97    2.19
  19   0   3   40.23    2.25
  20   0   3    0.22    0.35
 -20   0  -3   -0.29    0.41
  20   0   3    0.27    0.39
 -20   0  -3   -0.54    0.39
 -21   0  -3    6.66    0.69
  21   0   3    7.26    0.66
  21   0   3    6.37    0.64
 -22  -1   3    1.28    0.51
  22  -1  -3    2.31    0.43
 -22   1   3    2.30    0.43
 -22   1   3    1.56    0.46
  21  -1  -3   66.75    3.17
 -21  -1   3   61.62    3.55
 -21  -1   3   63.25    3.07
 -21  -1   3   64.00    3.00
  21  -1  -3   63.84    3.18
 -21   1   3   65.31    3.17
 -21   1   3   64.55    3.17
  21   1  -3   63.99    3.03
  21   1  -3   59.00    2.73
  21   1  -3   64.45    2.85
 -20  -1   3    0.01    0.54
  20  -1  -3    0.74    0.54
  20  -1  -3    1.31    0.57
 -20  -1   3    0.40    0.51
  20  -1  -3   -0.84    0.56
  20   1  -3    0.29    0.40
  20   1  -3    0.90    0.67
  20   1  -3    0.77    0.54
 -20   1   3   -0.27    0.59
  20   1  -3   -0.37    0.37
 -20   1   3    0.46    0.54
  20   1  -3    1.19    0.43
 -19  -1   3   97.32    4.69
  19  -1  -3   97.00    4.86
  19  -1  -3   92.85    4.82
 -19  -1   3   98.04    4.72
  19  -1  -3   95.32    4.75
  19  -1  -3   96.50    4.23
  19  -1  -3  100.05    4.21
  19   1  -3   93.72    4.72
  19   1  -3   96.33    4.63
 -19   1   3   97.61    4.81
  19   1  -3   88.13    4.60
  19   1  -3   87.27    3.98
 -19   1   3   98.17    4.75
  19   1  -3   94.20    4.59
  19   1  -3   93.11    4.60
  18  -1  -3    6.90    1.21
  18  -1  -3    9.42    0.90
  18  -1  -3    8.85    1.33
  18  -1  -3    7.93    0.92
 -18  -1   3    7.38    1.25
 -18  -1   3    9.47    1.26
  18  -1  -3    8.55    1.39
  18  -1  -3    5.05    1.10
  18  -1  -3    9.37    0.87
 -18   1   3    9.16    1.30
  18   1  -3    9.00    1.25
  18   1  -3   11.19    1.37
  18   1  -3    7.57    1.13
 -18   1   3    9.90    1.43
  18   1  -3    9.85    1.04
  18   1  -3    7.76    1.17
  18   1  -3    9.59    1.28
  17  -1  -3   39.53    2.30
  17  -1  -3   40.54    2.26
 -17  -1   3   41.06    2.69
  17  -1  -3   38.80    2.69
  17  -1  -3   39.47    2.63
 -17  -1   3   39.94    2.62
  17  -1  -3   45.19    2.94
  17  -1  -3   37.66    2.24
  17  -1  -3   37.54    2.58
  17   1  -3   41.47    2.68
  17   1  -3   35.74    2.40
  17   1  -3   40.58    2.59
 -17   1   3   36.38    2.71
  17   1  -3   38.32    2.52
  17   1  -3   39.06    2.71
  17   1  -3   40.16    2.57
  16  -1  -3    7.53    0.82
 -16  -1   3    6.64    1.26
  16  -1  -3    9.13    1.55
  16  -1  -3    7.45    1.40
  16  -1  -3    6.49    0.95
 -16  -1   3    6.93    1.25
  16  -1  -3    8.12    1.30
  16  -1  -3    6.69    0.99
  16  -1  -3    8.40    1.03
  16  -1  -3    7.98    1.24
 -16   1   3    7.25    3.12
  16   1  -3    9.02    1.37
 -16   1   3    6.82    1.35
  16   1  -3    6.91    1.12
  16   1  -3    8.70    1.25
  16   1  -3    8.53    1.26
  16   1  -3    9.36    1.50
  16   1  -3    5.75    1.35
  15  -1  -3   16.62    2.28
  15  -1  -3   12.89    1.60
 -15  -1   3   13.57    1.59
  15  -1  -3   10.22    1.30
  15  -1  -3   10.88    1.47
  15  -1  -3   12.60    1.28
 -15  -1   3   11.21    1.51
  15  -1  -3   12.04    1.60
  15  -1  -3   12.04    1.14
  15  -1  -3   12.02    1.21
 -15   1   3   10.97    2.19
  15   1  -3   15.49    2.32
  15   1  -3   12.65    1.68
  15   1  -3   11.32    1.58
 -15   1   3   10.65    1.56
  15   1  -3   11.28    1.53
  15   1  -3   13.44    1.55
  15   1  -3   10.65    1.44
  15   1  -3    9.99    1.64
  14  -1  -3   18.21    1.51
  14  -1  -3   21.17    1.66
 -14  -1   3   23.43    2.29
  14  -1  -3   17.55    1.52
 -14  -1   3   17.95    1.84
  14  -1  -3   21.06    1.72
  14   1  -3   20.33    1.23
  14   1  -3   17.69    1.82
 -14   1   3   17.97    2.41
  14   1  -3   18.37    1.69
  13  -1  -3    9.62    3.19
 -13  -1   3   10.33    1.44
  13  -1  -3   11.89    1.16
  13  -1  -3   11.35    1.36
  13  -1  -3   13.84    1.56
  13   1  -3   11.77    0.92
 -13   1   3   11.53    2.11
  13   1  -3   14.16    3.19
  13   1  -3   12.05    1.23
 -13   1   3   10.95    1.44
  13   1  -3   12.35    0.99
 -12  -1   3   16.45    1.64
  12  -1  -3   16.96    1.36
 -12  -1   3   17.05    2.18
  12   1  -3   19.09    1.39
  12   1  -3   16.24    1.22
 -12   1   3   13.47    1.47
 -12   1   3   15.72    2.01
  12   1  -3   15.74    1.19
 -11  -1   3   63.84    4.30
  11  -1  -3   68.19    5.44
 -11  -1   3   69.81    3.77
  11  -1  -3   67.72    3.36
 -11   1   3   67.21    4.43
  11   1  -3   63.12    5.24
  11   1  -3   64.96    3.36
  11   1  -3   67.08    3.38
 -11   1   3   65.39    3.66
  10  -1  -3   31.27    1.92
 -10  -1   3   32.55    2.61
 -10  -1   3   30.98    2.08
  10  -1  -3   30.67    3.35
  10  -1  -3   30.92    1.79
  10   1  -3   32.47    1.84
 -10   1   3   26.31    1.97
  10   1  -3   30.84    3.24
 -10   1   3   33.12    2.65
   9  -1  -3   92.81    4.32
  -9  -1   3   93.50    4.65
   9  -1  -3   98.50    4.53
   9  -1  -3   89.48    6.16
  -9  -1   3   97.34    5.23
   9   1  -3   91.76    6.09
  -9   1   3   97.06    4.62
   9   1  -3   94.76    4.36
  -9   1   3   94.05    5.23
  -8  -1   3   14.55    1.33
   8  -1  -3   13.67    0.97
  -8  -1   3   16.45    3.26
  -8  -1   3   15.03    1.51
   8  -1  -3   15.05    1.13
   8  -1  -3   15.17    2.10
  -8  -1   3   15.35    1.24
  -8   1   3   14.86    1.18
  -8   1   3   13.81    1.52
   8   1  -3   14.38    1.96
   8   1  -3   13.42    1.03
  -7  -1   3  433.78   21.66
   7  -1  -3  411.31   17.20
  -7  -1   3  407.73   17.69
  -7  -1   3  382.87   18.51
   7  -1  -3  356.48   18.69
  -7  -1   3  436.42   17.29
   7  -1  -3  406.51   16.95
  -7  -1   3  396.31   17.39
  -7   1   3  462.26   22.65
  -7   1   3  377.72   17.15
  -7   1   3  396.08   17.69
   7   1  -3  449.75   18.86
   6  -1  -3   32.95    1.96
  -6  -1   3   33.92    2.74
  -6  -1   3   38.35    2.13
  -6  -1   3   38.54    2.34
   6  -1  -3   37.85    3.95
   6  -1  -3   36.26    3.08
  -6  -1   3   36.70    2.01
  -6  -1   3   35.98    4.07
   6   1  -3   37.54    1.97
  -6   1   3   33.12    2.26
   6   1  -3   40.79    2.95
  -6   1   3   41.47    3.26
   6   1  -3   34.01    2.09
  -6   1   3   36.35    1.97
   6   1  -3   38.42    4.19
  -6   1   3   41.57    4.70
  -6   1   3   32.71    2.20
   5  -1  -3  426.24   18.75
  -5  -1   3  446.21   18.69
   5  -1  -3  494.13   22.00
   5  -1  -3  456.26   20.26
  -5  -1   3  450.67   19.65
  -5  -1   3  434.58   18.79
  -5  -1   3  421.53   18.77
  -5  -1   3  442.24   19.00
  -5  -1   3  477.94   21.98
  -5   1   3  481.32   22.85
  -5   1   3  429.22   18.68
   5   1  -3  447.70   19.72
   5   1  -3  409.38   18.81
  -5   1   3  422.86   18.91
  -5   1   3  445.18   19.00
  -5   1   3  486.74   20.37
   5   1  -3  450.91   18.73
   5   1  -3  479.52   22.09
   4  -1  -3   41.15    2.28
   4  -1  -3   50.50    4.41
   4  -1  -3   46.01    4.59
  -4  -1   3   46.22    3.98
  -4  -1   3   42.88    2.12
  -4  -1   3   43.32    2.73
   4  -1  -3   41.90    1.92
   4  -1  -3   44.73    3.32
  -4  -1   3   40.34    2.21
   4   1  -3   40.38    2.19
  -4   1   3   40.22    2.29
  -4   1   3   49.10    2.45
   4   1  -3   41.35    2.77
   4   1  -3   43.96    2.28
  -4   1   3   43.03    3.21
  -4   1   3   41.70    4.38
   4   1  -3   45.81    3.99
  -4   1   3   45.76    2.18
  -3  -1   3  238.77   10.33
   3  -1  -3  208.90   11.21
  -3  -1   3  249.57   10.95
   3  -1  -3  265.01   13.75
  -3  -1   3  247.05   10.22
   3  -1  -3  283.04   13.80
  -3  -1   3  261.19   12.50
   3  -1  -3  247.85   11.79
  -3   1   3  214.05   10.32
  -3   1   3  251.84   11.85
   3   1  -3  246.57   10.39
  -3   1   3  241.66   10.48
  -3   1   3  237.16   13.48
  -3   1   3  211.82   10.48
   3   1  -3  282.23   11.15
   3   1  -3  268.33   12.74
   3   1  -3  236.59   10.43
   2  -1  -3   66.63    5.61
  -2  -1   3   61.31    3.23
  -2  -1   3   65.66    3.37
   2  -1  -3   56.57    2.82
  -2  -1   3   58.50    4.12
   2  -1  -3   58.50    5.08
   2  -1  -3   65.58    4.05
  -2   1   3   64.12    4.13
   2   1  -3   64.64    2.83
   2   1  -3   62.68    2.90
   2   1  -3   68.54    4.42
  -2   1   3   64.03    3.02
  -2   1   3   62.23    5.50
  -2   1   3   63.55    2.96
  -2   1   3   56.13    2.85
   2   1  -3   66.36    3.33
   1  -1  -3    5.10    2.06
   1  -1  -3    4.95    1.22
  -1  -1   3    6.09    1.11
  -1  -1   3    5.21    1.07
   1  -1  -3    4.99    0.52
   1  -1  -3    5.26    1.68
  -1  -1   3    5.01    0.62
  -1   1   3    5.21    0.56
   1   1  -3    5.77    1.10
   1   1  -3    5.40    0.50
  -1   1   3    6.39    1.44
  -1   1   3    4.26    1.95
  -1   1   3    4.33    0.49
  -1   1   3    5.86    1.76
   1   1  -3    5.40    0.67
   0  -1  -3  203.01   10.06
   0  -1  -3  245.79   12.70
   0  -1  -3  231.56   10.98
   0  -1   3  259.40   10.01
   0  -1   3  238.61   10.21
   0  -1  -3  232.61   13.41
   0  -1  -3  240.53    9.88
   0  -1   3  205.97    9.99
   0   1   3  226.74    9.81
   0   1   3  227.41   12.26
   0   1   3  232.51    9.88
   0   1   3  233.81   11.03
   0   1  -3  264.71   10.90
   0   1   3  257.49   13.33
  -1  -1  -3   99.18    4.39
  -1  -1  -3   98.14    6.58
  -1  -1  -3   97.80    4.19
  -1  -1  -3   82.04    4.93
  -1  -1  -3  105.08    6.95
   1  -1   3   96.37    4.04
   1   1   3   82.20    4.00
   1   1   3   94.57    4.15
  -1   1  -3   92.47    4.63
   1   1   3   99.71    6.57
  -2  -1  -3  106.39    5.16
  -2  -1  -3   98.94    6.63
  -2  -1  -3   84.37    4.34
  -2  -1  -3   79.44    6.31
  -2  -1  -3   95.97    4.22
   2   1   3   92.99    6.28
   2   1   3   97.36    5.02
   2   1   3  101.10    6.40
   2   1   3   94.75    4.16
  -3  -1  -3   62.05    3.35
  -3  -1  -3   74.14    3.25
  -3  -1  -3   72.76    5.60
  -3  -1  -3   66.19    3.96
  -3  -1  -3   74.03    5.58
  -3   1  -3   68.70    3.34
   3   1   3   75.60    4.05
   3   1   3   68.66    3.14
   3   1   3   73.90    5.34
   3   1   3   59.61    4.99
  -4  -1  -3   27.41    2.25
  -4  -1  -3   29.54    1.64
  -4  -1  -3   29.85    3.47
   4   1   3   30.84    3.30
   4   1   3   25.60    1.50
   4   1   3   31.28    2.32
  -4   1  -3   28.91    2.03
   4   1   3   29.65    1.50
  -5  -1  -3  152.53    6.76
   5  -1   3  155.34    6.57
  -5  -1  -3  160.80   10.00
  -5  -1  -3  135.32    6.87
   5   1   3  161.11    9.45
   5   1   3  141.46    6.57
  -5   1  -3  171.92    7.97
   5   1   3  146.59    6.51
  -6  -1  -3    0.27    0.34
   6  -1   3    0.42    0.30
  -6  -1  -3    0.98    0.47
   6  -1   3    0.50    0.26
   6   1   3    0.83    0.29
  -6   1  -3    0.45    0.25
   6   1   3    0.43    0.20
  -7  -1  -3  361.28   16.28
   7  -1   3  377.50   15.97
   7  -1   3  360.52   16.12
  -7  -1  -3  377.02   16.10
  -7   1  -3  403.08   15.92
   7   1   3  391.43   17.29
   7   1   3  373.13   15.69
   7   1   3  377.57   15.52
   7   1   3  382.52   15.58
   8  -1   3    7.53    0.96
  -8  -1  -3    8.56    1.01
  -8  -1  -3    8.01    1.06
   8  -1   3    5.33    1.23
   8  -1   3    6.53    0.54
   8   1   3    7.19    0.67
   8   1   3    8.08    1.40
  -8   1  -3    6.51    0.81
  -9  -1  -3  228.73   11.17
   9  -1   3  242.87   11.27
   9  -1   3  244.15   10.51
  -9  -1  -3  272.00   11.58
  -9   1  -3  262.19   11.12
   9   1   3  270.04   12.51
   9   1   3  244.64   10.67
 -10  -1  -3   34.65    2.48
  10  -1   3   28.51    1.54
 -10  -1  -3   28.52    2.18
  10  -1   3   26.43    2.07
 -10   1  -3   28.95    2.04
  10   1   3   26.26    2.74
  10   1   3   28.11    1.66
  11  -1   3   49.36    2.56
  11  -1   3   50.31    2.91
 -11  -1  -3   54.29    3.55
  11  -1   3   53.32    2.55
 -11  -1  -3   50.23    3.32
  11   1   3   48.98    2.64
  11   1   3   52.56    2.78
 -11   1  -3   50.95    3.14
  11   1   3   47.16    4.06
 -12  -1  -3   30.19    2.53
  12  -1   3   28.20    1.62
  12  -1   3   30.29    1.74
  12  -1   3   28.42    1.74
  12   1   3   27.50    1.93
  12   1   3   30.05    1.84
 -12   1  -3   30.96    2.33
  12   1   3   31.22    1.95
  13  -1   3    1.83    0.44
  13  -1   3    0.67    0.36
  13  -1   3    0.93    0.45
  13  -1   3    1.40    0.43
  13   1   3    0.68    0.46
 -13   1  -3    0.57    0.61
  13   1   3    0.60    0.72
  13   1   3    0.95    0.67
  13   1   3    1.31    0.64
  13   1   3    0.12    0.58
 -14  -1  -3   45.67    3.79
  14  -1   3   48.76    2.65
  14  -1   3   46.51    2.26
  14  -1   3   47.75    2.60
  14  -1   3   49.35    2.16
  14   1   3   47.16    2.78
  14   1   3   46.05    2.69
  14   1   3   48.75    2.74
  14   1   3   53.84    2.92
  14   1   3   48.34    2.57
  14   1   3   45.18    2.83
 -14   1  -3   49.22    3.45
  15  -1   3    4.76    0.77
  15  -1   3    5.63    0.88
 -15  -1  -3    3.80    1.11
  15   1   3    7.45    1.00
  15   1   3    4.52    0.84
  15   1   3    3.77    0.88
  15   1   3    5.99    1.01
  15   1   3    5.11    0.87
 -16  -1  -3   28.40    2.17
  16  -1   3   32.12    1.96
  16  -1   3   30.34    1.95
  16   1   3   35.73    2.02
  16   1   3   30.60    2.17
  16   1   3   31.88    2.01
  16   1   3   30.11    2.06
  16   1   3   31.24    2.33
  16   1   3   31.04    1.99
 -17  -1  -3    7.85    1.18
  17  -1   3    9.60    0.96
 -17  -1  -3    7.48    1.09
  17  -1   3    8.24    1.14
  17   1   3    8.26    1.23
  17   1   3    9.11    0.94
  17   1   3    7.12    0.84
  17   1   3    9.13    1.15
  17   1   3    8.89    1.21
 -18  -1  -3    9.86    1.15
  18  -1   3   11.00    1.09
 -18  -1  -3   11.35    1.25
  18   1   3    7.80    1.00
  18   1   3    9.99    1.18
  19  -1   3   53.64    2.71
 -19  -1  -3   49.75    2.72
 -19  -1  -3   50.58    2.69
  19  -1   3   49.51    2.80
 -19   1  -3   52.65    2.77
  19   1   3   53.42    2.76
  19   1   3   50.10    2.67
 -20  -1  -3    4.77    0.65
  20  -1   3    6.22    0.75
 -20  -1  -3    5.69    0.70
  20  -1   3    7.77    0.75
 -20   1  -3    8.60    0.86
  20   1   3    7.94    0.81
  20   1   3    7.54    0.79
  21  -2  -3    6.18    0.78
 -21  -2   3    4.33    0.83
 -21  -2   3    7.52    1.32
  21  -2  -3    6.20    0.70
  21   2  -3    4.56    0.58
  21   2  -3    7.23    0.69
 -21   2   3    5.23    0.76
 -21   2   3    4.22    0.64
  20  -2  -3   70.68    3.56
  20  -2  -3   66.84    3.57
 -20  -2   3   74.68    4.15
 -20  -2   3   69.31    3.37
  20   2  -3   74.18    3.55
 -20   2   3   71.43    3.61
  20   2  -3   74.69    3.57
  20   2  -3   68.58    3.55
 -20   2   3   72.10    3.57
  19  -2  -3    0.03    0.46
 -19  -2   3   -0.28    0.45
  19  -2  -3    0.04    0.55
 -19  -2   3   -0.11    0.76
 -19  -2   3    0.15    0.47
  19  -2  -3    0.15    0.58
 -19   2   3    0.51    0.68
  19   2  -3   -0.33    0.54
  19   2  -3    0.12    0.51
  19   2  -3    0.71    0.47
 -19   2   3    0.13    0.63
  19   2  -3    0.63    0.60
  19   2  -3   -0.51    0.53
  18  -2  -3   47.01    3.00
  18  -2  -3   50.33    2.26
  18  -2  -3   50.60    2.35
  18  -2  -3   54.25    3.20
 -18  -2   3   49.40    2.86
 -18  -2   3   53.34    2.90
  18  -2  -3   52.50    3.01
  18  -2  -3   47.23    3.02
 -18   2   3   48.98    3.07
  18   2  -3   48.78    2.86
  18   2  -3   50.54    3.05
  18   2  -3   49.12    3.12
  18   2  -3   57.23    2.93
  18   2  -3   53.92    3.12
 -17  -2   3   13.59    1.47
  17  -2  -3   13.52    1.79
  17  -2  -3   12.43    0.82
  17  -2  -3   13.45    1.59
  17  -2  -3   14.08    1.66
  17  -2  -3   12.46    1.01
  17  -2  -3   14.71    1.05
  17  -2  -3   14.85    2.19
 -17  -2   3   15.58    1.59
  17  -2  -3   13.61    1.56
  17   2  -3   14.82    1.64
  17   2  -3   12.68    1.48
  17   2  -3   14.74    1.52
  17   2  -3    9.54    1.26
  17   2  -3   11.58    1.62
  17   2  -3   13.87    1.71
 -17   2   3   13.17    1.63
  16  -2  -3   21.53    2.02
  16  -2  -3   18.24    1.33
 -16  -2   3   21.34    1.74
  16  -2  -3   18.27    1.67
  16  -2  -3   18.57    1.74
 -16  -2   3   18.90    1.75
  16  -2  -3   19.93    2.66
  16  -2  -3   19.85    1.36
  16  -2  -3   19.74    1.34
 -16   2   3   19.25    2.16
  16   2  -3   19.61    1.74
  16   2  -3   19.25    2.01
  16   2  -3   17.20    1.71
  16   2  -3   22.68    2.03
  16   2  -3   22.59    1.91
  16   2  -3   18.36    1.95
  15  -2  -3  120.23    6.57
 -15  -2   3  113.49    5.59
  15  -2  -3  114.43    5.31
 -15  -2   3  113.20    5.61
  15  -2  -3  119.55    5.77
  15  -2  -3  114.82    5.29
  15  -2  -3  114.03    5.86
  15  -2  -3  112.89    5.27
  15  -2  -3  120.84    5.79
  15   2  -3  121.74    5.63
  15   2  -3  110.72    5.89
  15   2  -3  115.29    6.07
  15   2  -3  114.40    5.20
  15   2  -3  116.39    5.87
  15   2  -3  113.88    5.80
  15   2  -3  117.41    5.67
 -15   2   3  111.07    7.09
  15   2  -3  116.74    5.20
  14  -2  -3    0.22    0.42
  14  -2  -3    0.42    0.51
  14  -2  -3   -0.13    0.40
 -14  -2   3    0.65    0.83
  14  -2  -3   -0.12    0.50
 -14  -2   3    1.43    0.74
  14  -2  -3   -0.19    0.56
  14  -2  -3    0.34    0.47
  14  -2  -3   -0.79    1.36
 -14   2   3    0.75    0.95
  14   2  -3    0.46    0.41
  14   2  -3   -0.78    0.92
  14   2  -3    0.89    0.56
  14   2  -3   -0.11    0.89
  13  -2  -3  125.97    5.97
  13  -2  -3  129.23    6.22
 -13  -2   3  140.51    6.84
  13  -2  -3  131.92    6.37
 -13   2   3  126.93    6.67
  13   2  -3  129.40    6.17
 -13   2   3  133.61    7.71
  13   2  -3  137.42    6.09
  12  -2  -3    6.15    1.08
  12  -2  -3    4.46    0.80
  12  -2  -3    4.41    1.76
 -12  -2   3    5.37    1.12
 -12   2   3    4.50    1.43
  12   2  -3    3.38    0.73
  12   2  -3    5.17    2.93
 -12   2   3    3.57    0.92
  12   2  -3    5.19    0.87
 -11  -2   3   32.77    2.26
  11  -2  -3   29.21    1.93
  11  -2  -3   32.56    3.57
  11  -2  -3   30.72    1.90
  11   2  -3   30.89    3.73
  11   2  -3   31.46    2.06
 -11   2   3   28.52    2.73
 -11   2   3   28.34    2.15
  10  -2  -3   72.92    5.54
  10  -2  -3   74.09    3.64
 -10  -2   3   69.37    3.82
  10  -2  -3   69.16    3.45
  10   2  -3   75.60    5.72
 -10   2   3   67.18    3.76
 -10   2   3   71.94    4.55
   9  -2  -3   14.40    2.31
   9  -2  -3   15.26    1.04
  -9  -2   3   14.66    1.30
   9  -2  -3   13.60    1.17
  -9   2   3   16.18    1.30
   9   2  -3   11.69    2.07
  -9   2   3   10.34    1.49
   8  -2  -3  295.99   12.72
  -8  -2   3  301.37   12.81
   8  -2  -3  322.32   15.12
  -8  -2   3  286.80   17.90
   8  -2  -3  292.52   12.45
  -8   2   3  299.72   13.40
  -8   2   3  266.40   12.70
   8   2  -3  308.46   14.73
   8   2  -3  301.67   12.71
   7  -2  -3  104.34    6.68
   7  -2  -3  106.78    4.52
   7  -2  -3  104.41    4.71
  -7  -2   3  115.17    5.04
   7  -2  -3  106.95    5.03
  -7  -2   3  110.56    8.84
  -7  -2   3  101.47    6.28
  -7   2   3  102.42    4.96
  -7   2   3  115.69    5.55
   7   2  -3  104.13    5.04
   7   2  -3  108.30    6.43
   6  -2  -3  183.90    8.00
   6  -2  -3  188.81   10.08
  -6  -2   3  204.66    8.28
  -6  -2   3  180.92    8.28
   6  -2  -3  189.68    8.42
  -6  -2   3  194.57    9.61
  -6  -2   3  190.90   11.99
   6   2  -3  195.04    8.44
   6   2  -3  196.96    8.59
  -6   2   3  183.44    8.26
  -6   2   3  182.65    8.66
   6   2  -3  185.29    9.60
  -5  -2   3    1.53    1.20
   5  -2  -3    0.22    0.80
  -5  -2   3    0.42    1.08
   5  -2  -3    0.60    0.90
   5  -2  -3    0.22    0.36
  -5  -2   3    0.87    0.32
  -5  -2   3    1.22    0.68
   5  -2  -3    0.66    0.76
  -5  -2   3    0.93    0.29
   5   2  -3    1.33    0.75
   5   2  -3    0.91    0.40
   5   2  -3    0.97    0.44
  -5   2   3    0.96    0.38
  -5   2   3    0.20    1.31
  -5   2   3    1.11    0.49
  -4  -2   3   56.02    2.32
   4  -2  -3   52.15    3.94
  -4  -2   3   45.68    4.45
   4  -2  -3   46.97    2.83
   4  -2  -3   51.74    5.08
   4  -2  -3   41.12    4.56
  -4  -2   3   56.65    3.39
  -4  -2   3   52.97    5.09
  -4  -2   3   50.46    2.55
   4   2  -3   55.27    3.48
  -4   2   3   57.76    6.34
  -4   2   3   47.70    2.74
   4   2  -3   52.59    2.75
  -4   2   3   53.06    4.28
  -4   2   3   52.68    2.81
  -4   2   3   60.44    2.67
   4   2  -3   54.69    2.74
   3  -2  -3  133.66    9.34
   3  -2  -3  116.70    8.45
  -3  -2   3  128.04    5.78
   3  -2  -3  125.45    6.15
   3  -2  -3  134.75    7.45
  -3  -2   3  136.04    8.56
  -3  -2   3  135.28    6.54
  -3  -2   3  126.26    7.94
  -3   2   3  129.54    7.58
  -3   2   3  123.75    5.98
  -3   2   3  136.04    6.09
   3   2  -3  153.52    6.84
   3   2  -3  133.26    5.97
   3   2  -3  137.80    5.96
  -3   2   3  145.58    5.93
  -3   2   3  133.58   10.52
   2  -2  -3  464.46   22.76
  -2  -2   3  415.99   17.47
   2  -2  -3  368.50   20.58
   2  -2  -3  456.98   17.36
   2  -2  -3  410.15   17.85
  -2  -2   3  396.93   20.02
   2  -2  -3  451.08   19.31
  -2  -2   3  424.81   18.13
  -2   2   3  430.64   19.46
   2   2  -3  424.05   17.58
  -2   2   3  441.70   22.11
  -2   2   3  390.89   17.62
   2   2  -3  422.89   17.62
  -2   2   3  437.94   17.74
  -2   2   3  433.92   17.82
   2   2  -3  379.31   18.20
  -2   2   3  455.68   23.64
  -1  -2   3  258.83   12.79
   1  -2  -3  244.57   11.09
  -1  -2   3  258.51   11.25
   1  -2  -3  254.80   14.23
   1  -2  -3  244.51   10.79
   1  -2  -3  286.98   16.22
  -1  -2   3  265.07   10.76
   1  -2  -3  278.21   12.48
   1   2  -3  261.01   10.67
  -1   2   3  289.98   16.58
  -1   2   3  250.08   12.45
  -1   2   3  273.72   11.04
  -1   2   3  218.34   14.03
  -1   2   3  242.65   11.07
   1   2  -3  261.45   10.85
  -1   2   3  259.01   10.98
   0  -2  -3   23.44    3.96
   0  -2  -3   19.82    3.01
   0  -2   3   19.02    1.04
   0  -2   3   20.06    1.33
   0  -2  -3   18.28    1.35
   0  -2  -3   21.66    1.24
   0  -2  -3   21.64    2.20
   0  -2   3   22.46    1.63
   0   2   3   20.65    1.29
   0   2   3   21.42    1.42
   0   2   3   20.73    1.30
   0   2  -3   22.84    1.11
   0   2   3   18.24    2.96
   0   2   3   18.65    3.56
   0   2  -3   19.61    2.22
  -1  -2  -3  350.44   17.95
   1  -2   3  325.62   14.43
  -1  -2  -3  355.13   14.29
  -1  -2  -3  323.81   14.63
  -1  -2  -3  338.61   19.10
  -1  -2  -3  357.59   15.85
   1  -2   3  330.57   13.98
   1  -2   3  332.52   14.20
   1   2   3  340.33   14.28
  -1   2  -3  360.58   15.59
   1   2   3  379.31   18.34
   1   2   3  326.68   14.29
   1   2   3  330.83   18.65
   1   2   3  322.05   14.41
  -2  -2  -3   65.34    3.77
  -2  -2  -3   81.18    3.57
   2  -2   3   68.88    3.17
  -2  -2  -3   74.55    6.32
  -2  -2  -3   66.95    6.57
  -2  -2  -3   81.15    4.83
  -2   2  -3   71.76    4.30
   2   2   3   74.52    3.46
   2   2   3   83.22    6.97
   2   2   3   73.67    3.52
   2   2   3   84.83    6.57
  -3  -2  -3  176.24    8.01
   3  -2   3  187.81    7.09
  -3  -2  -3  163.00   11.61
  -3  -2  -3  182.11    7.67
  -3  -2  -3  183.21   11.42
  -3  -2  -3  187.56    9.11
  -3   2  -3  156.29    8.45
   3   2   3  168.27   11.28
   3   2   3  158.82    7.41
   3   2   3  169.55    7.59
   3   2   3  187.42   11.29
  -4  -2  -3  156.40    6.66
  -4  -2  -3  130.10    6.87
  -4  -2  -3  151.04    8.02
  -4  -2  -3  157.83   10.58
   4   2   3  141.31   10.21
   4   2   3  148.31    6.54
  -5  -2  -3   89.61    7.73
  -5  -2  -3   80.16    4.05
  -5  -2  -3   87.95    4.45
   5   2   3   81.29    3.90
   5   2   3   76.23    3.71
  -6  -2  -3  306.32   13.54
  -6  -2  -3  331.46   14.02
   6   2   3  312.44   13.15
   6   2   3  305.66   13.29
  -7  -2  -3   23.78    2.00
  -7  -2  -3   21.21    1.65
   7   2   3   22.06    1.42
  -7   2  -3   21.15    1.33
   7   2   3   22.91    1.36
  -8  -2  -3   80.34    4.86
  -8  -2  -3   87.78    4.59
  -8   2  -3   89.64    4.24
   8   2   3   91.87    4.16
   8   2   3   92.75    6.03
   8   2   3   84.97    4.09
  -9  -2  -3   14.83    1.71
  -9  -2  -3   13.57    1.49
   9   2   3   14.43    2.18
   9   2   3   13.59    0.97
  -9   2  -3   14.58    1.27
   9   2   3   13.06    1.07
 -10  -2  -3   73.29    4.23
  10  -2   3   72.88    3.30
 -10  -2  -3   68.21    4.49
  10   2   3   69.61    5.39
  10   2   3   75.33    3.60
 -10   2  -3   71.43    3.87
 -11  -2  -3   74.68    4.30
 -11  -2  -3   75.23    4.72
  11  -2   3   65.38    3.25
  11  -2   3   70.02    3.26
  11   2   3   69.62    3.51
  11   2   3   66.41    3.03
  11   2   3   61.19    5.25
 -11   2  -3   68.96    3.87
 -12  -2  -3   64.42    4.53
  12  -2   3   62.03    3.02
  12  -2   3   60.76    3.03
 -12   2  -3   61.13    3.70
  12   2   3   63.70    3.52
  12   2   3   58.06    3.24
  13  -2   3   28.02    1.71
 -13  -2  -3   27.95    2.17
  13  -2   3   41.57    4.78
  13  -2   3   32.88    1.79
 -13  -2  -3   27.82    3.06
 -13   2  -3   29.58    2.36
  13   2   3   27.57    1.93
  13   2   3   27.17    2.19
  13   2   3   26.00    2.13
  13   2   3   27.42    2.05
  13   2   3   27.98    2.06
  13   2   3   26.11    2.23
 -14  -2  -3   10.11    1.41
  14  -2   3    8.48    1.58
 -14  -2  -3    6.45    1.16
  14  -2   3    6.49    0.85
  14  -2   3    8.89    0.99
  14   2   3   10.53    1.41
  14   2   3    7.59    1.14
 -14   2  -3    6.47    1.26
  14   2   3    8.58    1.33
  14   2   3    6.32    1.11
  14   2   3    6.11    1.05
  14   2   3    7.21    1.14
  14   2   3    7.47    1.14
  15  -2   3   60.77    3.17
 -15  -2  -3   62.90    3.47
 -15  -2  -3   59.45    3.45
  15  -2   3   60.96    3.98
  15  -2   3   57.89    3.14
  15   2   3   64.56    3.28
  15   2   3   72.89    3.63
  15   2   3   60.37    3.39
  15   2   3   63.38    3.46
  15   2   3   59.76    3.45
  15   2   3   63.06    3.53
  15   2   3   66.56    3.64
  16  -2   3    7.89    0.99
 -16  -2  -3    7.07    1.13
  16  -2   3    6.54    0.85
 -16  -2  -3    9.22    1.23
  16  -2   3    9.73    1.58
  16   2   3    9.04    1.26
  16   2   3    8.09    1.23
  16   2   3    8.71    1.14
  16   2   3    6.82    1.04
  16   2   3    7.38    1.09
  16   2   3    8.49    0.77
 -17  -2  -3   50.51    2.87
  17  -2   3   50.89    2.67
 -17  -2  -3   47.11    2.82
  17  -2   3   46.85    2.74
  17   2   3   54.32    2.80
  17   2   3   50.91    2.81
  17   2   3   52.40    2.83
  17   2   3   57.41    2.88
  17   2   3   50.11    2.91
 -18  -2  -3   42.87    2.39
  18  -2   3   44.34    2.40
 -18  -2  -3   42.72    2.39
  18   2   3   40.75    2.20
  18   2   3   41.74    2.42
  18   2   3   40.50    2.36
 -19  -2  -3   14.02    1.08
  19  -2   3   14.07    1.09
 -19  -2  -3   12.67    1.10
  19   2   3   13.12    1.12
  19   2   3   13.38    1.06
  20  -2   3   49.07    2.44
 -20  -2  -3   50.10    2.39
 -20  -2  -3   48.23    2.40
 -20   2  -3   51.90    2.48
  20   2   3   50.48    2.40
  21  -3  -3   -0.34    0.31
 -21  -3   3   -0.20    0.45
 -21  -3   3    0.07    0.57
  21  -3  -3   -0.17    0.28
 -21   3   3    0.43    0.38
 -21   3   3    0.57    0.47
  21   3  -3    0.23    0.35
  20  -3  -3    0.29    0.38
  20  -3  -3    0.10    0.32
  20  -3  -3    1.17    0.46
 -20  -3   3    1.09    0.83
 -20  -3   3    0.84    0.60
  20   3  -3    0.55    0.54
 -20   3   3    0.71    0.46
  20   3  -3    0.57    0.51
  20   3  -3   -0.33    0.52
 -20   3   3    0.92    0.48
 -19  -3   3    5.01    1.12
  19  -3  -3    7.08    1.00
  19  -3  -3    4.97    0.79
 -19  -3   3    5.08    1.36
  19  -3  -3    4.61    0.80
 -19   3   3    7.23    0.94
  19   3  -3    5.58    1.00
  19   3  -3    5.13    0.92
 -19   3   3    7.28    0.99
  19   3  -3    4.47    0.79
  19   3  -3    4.60    0.96
  18  -3  -3   51.04    3.11
 -18  -3   3   54.07    4.04
  18  -3  -3   51.06    3.51
  18  -3  -3   51.91    3.03
 -18  -3   3   57.17    2.72
  18  -3  -3   51.82    2.93
 -18  -3   3   51.76    3.59
  18   3  -3   55.09    3.34
  18   3  -3   53.22    3.09
  18   3  -3   55.57    3.39
 -18   3   3   56.15    3.11
  18   3  -3   54.30    3.21
  17  -3  -3   11.02    1.41
 -17  -3   3   13.62    1.22
  17  -3  -3   12.21    1.23
 -17  -3   3    9.64    1.68
  17  -3  -3   11.59    1.45
  17  -3  -3   13.93    2.03
 -17   3   3   11.46    1.38
  17   3  -3   11.84    1.54
  17   3  -3   10.01    1.64
  17   3  -3   11.75    1.24
  17   3  -3    9.77    1.59
  17   3  -3    8.64    1.35
  16  -3  -3   94.83    4.06
  16  -3  -3   89.42    5.39
  16  -3  -3   91.19    4.09
 -16  -3   3   95.18    4.49
  16  -3  -3   87.30    4.81
 -16  -3   3   97.88    4.52
  16  -3  -3   86.84    4.74
 -16  -3   3   91.34    5.47
  16  -3  -3   92.09    4.73
  16   3  -3   93.38    4.18
  16   3  -3   90.99    4.50
  16   3  -3  102.06    5.37
  16   3  -3   90.94    5.25
  16   3  -3   99.55    5.13
  15  -3  -3    1.99    0.45
  15  -3  -3    1.22    0.74
 -15  -3   3    1.89    0.70
  15  -3  -3    2.33    0.72
 -15  -3   3    2.68    1.24
  15  -3  -3    2.00    1.20
  15  -3  -3    1.96    0.45
 -15  -3   3    2.06    0.70
  15  -3  -3    1.82    0.38
  15  -3  -3    1.11    0.92
  15   3  -3    1.52    0.62
  15   3  -3    0.78    0.99
  15   3  -3    0.55    0.37
  15   3  -3    1.37    0.80
  14  -3  -3   94.97    4.40
  14  -3  -3   92.70    4.85
  14  -3  -3   90.51    5.59
  14  -3  -3   99.13    4.45
  14  -3  -3  103.70    5.05
 -14  -3   3  101.13    4.72
 -14  -3   3  103.94    4.76
  14  -3  -3   92.91    5.06
  14  -3  -3   97.36    4.45
 -14  -3   3   97.40    5.62
  14   3  -3   87.61    5.18
  14   3  -3   95.66    4.77
  14   3  -3  107.65    4.86
  14   3  -3   97.47    5.10
 -14   3   3   92.25    6.28
 -13  -3   3    0.81    1.48
  13  -3  -3    0.54    0.43
 -13  -3   3    0.15    0.59
  13  -3  -3    0.97    0.54
  13  -3  -3    0.40    0.41
 -13  -3   3    0.68    0.67
  13  -3  -3    0.22    0.44
  13  -3  -3   -0.10    0.55
  13   3  -3    0.25    0.46
 -13   3   3    0.33    1.02
  13   3  -3   -0.34    0.62
  12  -3  -3  178.14    7.89
  12  -3  -3  186.63    7.89
  12  -3  -3  173.93    8.11
 -12   3   3  154.05    8.26
 -12   3   3  170.65    9.35
  12   3  -3  171.01    8.18
  12   3  -3  183.24    8.00
  11  -3  -3   16.18    1.25
  11  -3  -3   13.45    2.13
  11  -3  -3   15.14    1.25
  11  -3  -3   14.89    1.40
 -11   3   3   16.39    1.59
 -11   3   3   12.59    2.18
  11   3  -3   14.91    1.48
  11   3  -3   14.53    1.44
  10  -3  -3  140.47    8.39
  10  -3  -3  154.79    6.69
  10  -3  -3  155.64    6.54
  10   3  -3  147.61    6.99
 -10   3   3  119.83    6.77
 -10   3   3  153.47    7.84
   9  -3  -3    9.26    1.01
   9  -3  -3   10.81    1.87
   9  -3  -3    9.52    0.87
  -9   3   3   10.64    1.52
  -9   3   3   10.44    1.15
   8  -3  -3   40.28    3.57
  -8  -3   3   31.46    5.41
   8  -3  -3   40.08    2.34
   8  -3  -3   40.37    2.05
  -8   3   3   42.58    2.93
   8   3  -3   38.98    2.43
  -8   3   3   37.80    2.35
  -7  -3   3    0.47    0.79
   7  -3  -3    1.41    0.49
  -7  -3   3    0.66    0.52
   7  -3  -3    0.32    0.89
   7  -3  -3    0.76    0.34
  -7  -3   3    0.71    1.34
  -7   3   3    1.37    0.67
   7   3  -3    0.74    0.49
  -7   3   3    1.34    0.50
   6  -3  -3    8.95    1.62
  -6  -3   3    7.82    2.50
   6  -3  -3    9.17    0.73
  -6  -3   3    9.14    0.97
   6  -3  -3    7.00    1.96
  -6  -3   3    8.91    1.57
   6  -3  -3    8.39    1.14
  -6   3   3   10.54    1.00
  -6   3   3   12.57    1.32
   6   3  -3    9.85    1.09
   6   3  -3    9.70    1.09
  -5  -3   3   68.44    3.35
  -5  -3   3   64.89    4.35
   5  -3  -3   62.35    3.53
   5  -3  -3   70.56    3.03
  -5  -3   3   57.81    5.90
   5  -3  -3   71.44    4.75
  -5   3   3   63.56    3.33
  -5   3   3   66.36    3.60
   5   3  -3   68.79    3.57
   5   3  -3   64.20    3.54
   4  -3  -3   34.30    2.22
  -4  -3   3   34.91    1.93
   4  -3  -3   34.01    1.66
   4  -3  -3   25.30    3.50
  -4  -3   3   25.71    3.59
   4  -3  -3   40.02    3.22
  -4  -3   3   41.28    2.88
  -4   3   3   33.64    1.99
   4   3  -3   35.14    2.13
   4   3  -3   35.86    2.17
  -4   3   3   31.52    2.14
   3  -3  -3    7.47    1.62
   3  -3  -3    5.62    1.98
  -3  -3   3    6.50    1.06
  -3  -3   3    5.34    1.60
   3  -3  -3    7.72    1.08
  -3  -3   3    6.42    0.69
  -3   3   3    8.32    0.86
  -3   3   3    8.33    0.95
   3   3  -3    6.95    0.82
   3   3  -3    6.92    0.87
  -2  -3   3  522.55   20.37
   2  -3  -3  486.09   21.33
   2  -3  -3  453.13   19.73
  -2  -3   3  470.83   19.37
  -2   3   3  484.20   27.42
  -2   3   3  474.06   19.61
   2   3  -3  461.46   19.60
  -2   3   3  475.47   19.77
   2   3  -3  383.19   19.44
  -2   3   3  453.55   19.64
   1  -3  -3   28.04    2.77
   1  -3  -3   23.44    3.53
  -1  -3   3   24.84    1.94
  -1  -3   3   30.84    1.58
  -1  -3   3   21.45    2.51
   1  -3  -3   26.40    1.83
  -1  -3   3   30.64    3.55
   1   3  -3   27.55    1.64
  -1   3   3   30.45    5.29
   1   3  -3   27.84    1.65
  -1   3   3   29.03    1.78
  -1   3   3   27.78    1.78
  -1   3   3   35.01    2.00
   0  -3   3  372.00   14.97
   0  -3   3  347.91   16.01
   0  -3   3  342.55   14.33
   0  -3  -3  317.92   16.21
   0  -3  -3  335.29   14.72
   0  -3   3  338.35   15.55
   0  -3  -3  318.81   18.38
   0   3   3  323.26   14.64
   0   3  -3  374.46   14.47
   0   3   3  361.44   14.69
   0   3   3  356.44   14.83
   0   3   3  327.09   21.05
   1  -3   3   20.36    1.46
   1  -3   3   21.70    1.90
  -1  -3  -3   20.84    3.57
  -1  -3  -3   22.35    2.52
   1  -3   3   22.04    1.21
  -1  -3  -3   19.13    1.50
   1   3   3   19.79    1.56
   1   3   3   22.09    1.47
   1   3   3   20.51    1.45
  -1   3  -3   18.29    1.18
   1   3   3   23.31    4.52
  -2  -3  -3  173.69    7.74
  -2  -3  -3  165.12   11.59
   2  -3   3  173.88    7.28
  -2  -3  -3  178.20    7.51
  -2  -3  -3  177.40    9.46
   2  -3   3  154.69    7.40
   2   3   3  181.00    7.88
   2   3   3  178.02    7.68
   2   3   3  162.34    7.59
  -2   3  -3  159.26    7.21
   2   3   3  180.24   13.19
   3  -3   3    0.09    0.12
  -3  -3  -3    0.23    1.08
   3  -3   3    1.18    0.29
  -3  -3  -3    0.35    0.77
  -3  -3  -3    0.44    0.40
  -3  -3  -3    0.01    0.33
   3  -3   3    0.15    0.11
  -3   3  -3    0.17    0.15
   3   3   3    1.41    1.62
   3   3   3    1.01    0.46
   3   3   3    0.00    0.27
  -4  -3  -3  339.05   14.69
  -4  -3  -3  357.37   16.95
  -4  -3  -3  319.62   19.89
   4  -3   3  371.67   14.09
   4   3   3  352.81   14.75
  -4   3  -3  303.61   14.11
   4   3   3  351.56   21.27
   4   3   3  357.36   14.59
  -5  -3  -3   -0.04    1.17
  -5  -3  -3    1.33    0.58
  -5   3  -3    0.50    0.16
   5   3   3    0.57    0.39
  -6  -3  -3   44.62    2.71
  -6  -3  -3   50.71    4.02
   6   3   3   46.87    2.64
  -6   3  -3   43.27    2.16
  -7  -3  -3   13.19    1.37
  -7   3  -3   12.65    1.00
   7   3   3   13.79    1.23
  -8  -3  -3    9.01    1.22
   8   3   3   10.42    2.54
   8   3   3   10.63    1.10
  -8   3  -3    9.96    1.05
  -9  -3  -3   21.56    2.00
   9   3   3   24.44    1.67
  -9   3  -3   25.29    1.79
   9   3   3   23.70    1.70
   9   3   3   25.22    3.38
  10  -3   3   28.53    1.55
 -10  -3  -3   24.77    2.26
 -10   3  -3   29.31    2.07
  10   3   3   21.66    3.36
  10   3   3   26.67    1.76
  10   3   3   28.08    1.77
  11  -3   3    0.48    0.38
 -11  -3  -3    1.02    0.81
  11  -3   3    0.57    0.33
 -11  -3  -3   -0.02    0.67
  11   3   3    0.01    0.38
 -11   3  -3    0.40    0.49
  11   3   3    0.66    0.36
  11   3   3    0.35    1.02
 -12  -3  -3   95.03    4.62
  12  -3   3   84.47    6.53
  12  -3   3   90.40    4.24
 -12  -3  -3   90.67    4.60
  12  -3   3   93.88    4.28
  12   3   3   91.83    4.68
  12   3   3   97.01    4.95
  12   3   3   89.61    4.88
  12   3   3   91.11    5.06
  12   3   3   90.58    4.93
 -12   3  -3   92.26    5.01
  12   3   3   88.42    4.56
  12   3   3   92.68    4.13
 -13  -3  -3    2.26    0.82
  13  -3   3    2.51    0.54
  13  -3   3    3.85    0.60
  13  -3   3    1.64    1.04
 -13  -3  -3    1.99    0.75
  13   3   3    1.92    0.92
  13   3   3    4.26    0.88
 -13   3  -3    2.32    0.82
  13   3   3    2.23    1.02
  13   3   3    2.23    1.11
  13   3   3    2.21    0.90
  13   3   3    3.97    1.12
  14  -3   3  148.42    6.68
  14  -3   3  153.31    7.65
 -14  -3  -3  145.31    6.93
 -14  -3  -3  143.03    6.94
  14   3   3  152.31    7.46
  14   3   3  155.91    6.98
  14   3   3  136.61    7.15
  14   3   3  157.16    7.11
  14   3   3  166.05    7.29
  14   3   3  147.86    7.29
 -15  -3  -3    0.87    0.62
  15  -3   3    0.95    0.41
  15  -3   3    0.16    0.26
  15  -3   3    1.49    0.88
 -15  -3  -3    0.25    0.58
  15   3   3   -0.65    0.87
  15   3   3   -0.02    0.58
  15   3   3    0.04    0.64
  15   3   3    0.28    0.65
  15   3   3    1.65    0.77
  15   3   3   -0.16    0.70
  16  -3   3  107.67    5.60
  16  -3   3  100.24    4.79
 -16  -3  -3  104.86    5.00
 -16  -3  -3  108.62    5.06
  16  -3   3   99.86    4.83
  16   3   3  102.08    5.06
  16   3   3  105.50    5.38
  16   3   3  107.97    4.92
  16   3   3  105.86    5.01
  16   3   3  110.07    5.28
  16   3   3  104.97    5.28
  17  -3   3    1.19    0.37
 -17  -3  -3    1.70    0.59
 -17  -3  -3    1.11    0.48
  17   3   3    0.56    0.51
  17   3   3    2.26    0.72
  17   3   3    1.76    0.70
  17   3   3    1.06    0.56
  17   3   3    1.56    0.68
 -18  -3  -3   31.38    1.82
  18  -3   3   30.57    1.82
 -18  -3  -3   32.30    1.83
  18   3   3   30.83    1.79
  18   3   3   32.15    1.72
  18   3   3   30.82    1.91
 -19  -3  -3    1.91    0.43
  19  -3   3    1.99    0.42
  19   3   3    1.78    0.41
  20  -3   3   11.79    0.85
  20  -4  -3   82.94    3.75
 -20  -4   3   75.70    4.21
  20  -4  -3   84.61    3.73
 -20  -4   3   80.68    4.11
  20   4  -3   78.44    3.90
  20   4  -3   81.56    3.89
 -20   4   3   84.73    3.74
 -19  -4   3    2.96    0.93
  19  -4  -3    4.90    0.71
 -19  -4   3    3.00    0.82
  19  -4  -3    2.22    0.49
  19  -4  -3    3.41    0.66
 -19  -4   3    3.49    0.85
  19   4  -3    3.22    0.92
  19   4  -3    3.78    0.88
  19   4  -3    2.91    0.76
 -19   4   3    4.38    0.77
 -19   4   3    4.54    0.69
  19   4  -3    3.71    0.67
  18  -4  -3   57.85    3.44
 -18  -4   3   54.90    3.44
 -18  -4   3   53.56    3.76
  18  -4  -3   58.06    2.91
  18  -4  -3   55.65    3.02
 -18  -4   3   51.73    3.33
  18  -4  -3   53.02    2.83
 -18   4   3   54.11    2.92
  18   4  -3   52.88    3.09
  18   4  -3   54.83    3.30
  18   4  -3   49.68    3.31
  18   4  -3   54.62    3.35
  17  -4  -3    5.66    0.99
  17  -4  -3    6.34    1.24
  17  -4  -3    5.64    0.87
  17  -4  -3    5.87    1.17
 -17  -4   3    6.05    1.34
 -17  -4   3    5.68    1.50
 -17  -4   3    6.69    1.31
  17   4  -3    5.02    1.09
  17   4  -3    5.67    1.28
 -17   4   3    6.29    1.00
 -16  -4   3   20.53    2.29
 -16  -4   3   23.45    2.19
  16  -4  -3   24.77    1.87
 -16  -4   3   26.91    2.72
  16  -4  -3   22.91    1.75
  16  -4  -3   21.35    1.64
  16  -4  -3   23.02    2.30
  16   4  -3   23.36    2.18
  16   4  -3   23.31    1.43
  16   4  -3   20.42    1.30
 -15  -4   3    5.57    1.41
  15  -4  -3    5.47    0.97
 -15  -4   3    7.31    1.75
 -15  -4   3    7.32    1.62
  15  -4  -3    7.60    1.28
  15  -4  -3    4.86    1.28
  15  -4  -3    7.81    1.09
  15   4  -3    7.89    1.51
  15   4  -3    8.19    1.20
  15   4  -3    5.90    0.88
  14  -4  -3    4.00    0.50
  14  -4  -3    3.75    1.01
 -14  -4   3    5.42    1.28
  14  -4  -3    5.49    1.00
 -14  -4   3    5.08    1.39
 -14  -4   3    3.65    0.68
  14  -4  -3    3.83    1.18
 -14  -4   3    4.09    1.44
  14  -4  -3    3.63    0.44
  14  -4  -3    3.36    0.74
  14   4  -3    3.13    0.75
  14   4  -3    4.65    1.05
  13  -4  -3    9.12    1.29
 -13  -4   3   11.55    1.87
 -13  -4   3    9.88    0.95
  13  -4  -3    7.69    1.61
  13  -4  -3   10.67    1.85
 -13  -4   3   14.71    1.92
  13  -4  -3    8.59    0.79
  13  -4  -3    8.97    0.83
  13  -4  -3    9.60    1.26
  13  -4  -3    8.22    0.65
 -13  -4   3   10.98    2.04
  13   4  -3    7.40    1.14
 -13   4   3    8.09    1.81
  13   4  -3   10.86    1.59
  12  -4  -3    8.22    1.11
  12  -4  -3   10.14    1.81
 -12  -4   3    9.03    1.81
  12  -4  -3    8.87    1.71
 -12  -4   3    9.36    1.53
  12  -4  -3   10.09    0.86
  12  -4  -3   10.25    1.30
 -12  -4   3   11.42    2.13
  12  -4  -3    9.97    1.00
 -12  -4   3   10.19    0.97
  12   4  -3    8.18    1.57
  12   4  -3   11.20    1.45
 -12   4   3    6.91    1.73
  11  -4  -3    7.85    0.85
 -11  -4   3    9.65    1.54
 -11  -4   3    6.00    0.82
  11  -4  -3    6.07    0.96
  11  -4  -3    7.03    1.07
  11  -4  -3    7.04    1.60
  11  -4  -3    6.90    0.82
  11   4  -3    9.22    1.28
 -11   4   3    5.61    1.43
  11   4  -3    7.29    1.39
  10  -4  -3   48.19    2.86
  10  -4  -3   51.52    2.64
 -10  -4   3   48.89    3.20
  10  -4  -3   51.56    2.84
  10  -4  -3   51.77    2.73
  10   4  -3   50.00    3.18
  10   4  -3   50.76    3.30
 -10   4   3   50.31    3.26
 -10   4   3   53.28    3.81
   9  -4  -3    3.04    1.21
   9  -4  -3    2.94    0.59
   9  -4  -3    2.07    0.60
  -9  -4   3    4.10    0.97
   9  -4  -3    3.21    0.75
   9   4  -3    3.10    0.99
  -9   4   3    3.42    0.90
  -9   4   3    2.41    0.99
   8  -4  -3  257.62   10.88
   8  -4  -3  271.32   11.27
   8  -4  -3  214.19   12.41
  -8   4   3  264.38   11.52
   8   4  -3  250.31   11.61
   8   4  -3  262.10   11.67
  -8   4   3  265.47   12.09
  -7  -4   3    3.84    1.57
   7  -4  -3    2.64    1.15
  -7  -4   3    2.83    0.83
   7  -4  -3    2.54    0.50
   7  -4  -3    2.05    0.65
  -7   4   3    3.01    0.97
   7   4  -3    2.67    0.83
  -7   4   3    3.37    0.79
  -6  -4   3  216.40   10.22
   6  -4  -3  230.00   10.28
   6  -4  -3  216.71   11.62
  -6  -4   3  234.55   12.08
   6  -4  -3  225.11    9.69
  -6   4   3  223.47   10.57
   6   4  -3  236.78   10.65
   6   4  -3  242.62   10.65
  -6   4   3  224.51   10.28
   5  -4  -3    2.89    0.80
   5  -4  -3    3.54    0.54
  -5  -4   3    4.07    0.83
   5  -4  -3    3.55    1.24
  -5  -4   3    4.12    1.34
  -5   4   3    3.88    0.84
  -5   4   3    3.39    0.91
  -5   4   3    3.67    0.82
   5   4  -3    4.33    1.02
   5   4  -3    4.96    1.06
   4  -4  -3  173.56    9.33
  -4  -4   3  160.97    8.77
  -4  -4   3  164.79    7.57
   4  -4  -3  159.08    7.82
  -4   4   3  172.53    8.00
  -4   4   3  155.75    7.67
   4   4  -3  171.76    8.00
   4   4  -3  172.95    7.90
  -3  -4   3    5.51    1.36
   3  -4  -3    8.98    1.26
   3  -4  -3    5.36    1.55
  -3  -4   3    6.75    0.91
  -3   4   3    6.93    0.93
   3   4  -3    8.65    1.02
  -3   4   3    7.79    1.06
   3   4  -3    6.87    1.05
  -2  -4   3  102.45    5.69
   2  -4  -3   91.39    6.27
   2  -4  -3  103.72    5.16
  -2  -4   3  105.08    4.80
  -2   4   3   91.48    5.00
  -2   4   3  107.87    5.27
   2   4  -3  104.09    5.01
   2   4  -3  101.81    5.18
   1  -4  -3   25.57    1.83
  -1  -4   3   20.81    1.41
  -1  -4   3   19.26    2.54
  -1  -4   3   23.51    2.03
   1  -4  -3   19.64    2.52
   1  -4  -3   16.64    3.29
  -1   4   3   20.43    1.66
  -1   4   3   20.71    1.75
   1   4  -3   23.11    1.60
   1   4  -3   22.18    1.77
   0  -4   3    1.12    0.41
   0  -4   3    1.13    0.64
   0  -4  -3    0.33    1.02
   0  -4   3    1.07    0.59
   0  -4  -3    1.61    0.68
   0  -4  -3    1.50    1.00
   0   4  -3    1.46    0.50
   0   4  -3    1.06    0.54
   0   4   3    1.56    0.61
   0   4   3    2.80    0.77
  -1  -4  -3   62.19    3.63
   1  -4   3   65.86    3.26
  -1  -4  -3   52.24    6.31
  -1  -4  -3   73.81    5.28
   1  -4   3   72.50    3.79
   1   4   3   67.71    3.64
  -1   4  -3   61.99    3.32
   1   4   3   70.25    3.83
   1   4   3   67.29    3.63
   2  -4   3   14.43    1.13
  -2  -4  -3   14.79    3.54
   2  -4   3   15.73    1.33
  -2  -4  -3   19.15    2.67
  -2  -4  -3   15.72    1.49
   2   4   3   17.55    1.48
   2   4   3   14.88    1.46
  -2   4  -3   17.76    1.25
   3  -4   3    6.84    0.67
  -3  -4  -3    6.48    2.06
  -3  -4  -3    5.72    2.81
   3  -4   3    6.54    0.68
   3   4   3    5.68    0.90
   3   4   3    8.11    0.96
  -3   4  -3    6.56    0.74
   4  -4   3  158.62    6.50
  -4  -4  -3  137.39   12.09
   4   4   3  162.02    7.28
  -4   4  -3  141.71    6.75
   4   4   3  160.05    7.12
   5  -4   3    8.76    0.49
  -5   4  -3    8.40    0.84
   5   4   3    8.60    1.12
   6   4   3  298.09   13.08
  -6   4  -3  290.78   12.64
  -7   4  -3    6.63    0.88
   7   4   3    7.16    1.16
   8  -4   3  140.75    6.41
   8   4   3  146.75    7.12
   8   4   3  150.16    6.93
  -8   4  -3  152.91    6.95
   9  -4   3    4.58    0.63
   9   4   3    3.21    0.81
   9   4   3    3.32    0.80
  -9   4  -3    3.76    0.85
  10  -4   3  118.27    5.34
 -10  -4  -3  115.07    5.62
  10  -4   3  120.64    5.31
 -10  -4  -3  117.83    5.60
  10   4   3  125.00    5.77
  10   4   3  117.56    6.13
 -10   4  -3  120.76    6.03
  10   4   3  125.40    6.20
  11  -4   3    1.33    0.96
  11  -4   3    0.04    0.28
 -11  -4  -3   -0.06    0.54
 -11  -4  -3   -0.12    0.62
  11  -4   3    0.31    0.34
  11   4   3    0.03    0.75
  11   4   3   -0.18    1.10
 -11   4  -3   -0.07    0.50
  11   4   3    0.34    0.80
  11   4   3   -0.14    0.39
  11   4   3    0.38    0.63
  11   4   3   -1.18    0.61
  12  -4   3   60.58    3.86
 -12  -4  -3   54.98    3.06
  12  -4   3   56.33    2.84
  12  -4   3   58.04    2.86
 -12  -4  -3   55.19    3.11
 -12   4  -3   60.93    3.61
  12   4   3   59.02    3.10
  12   4   3   55.95    3.70
  12   4   3   57.17    3.65
  12   4   3   58.05    2.97
  12   4   3   53.98    3.13
  12   4   3   57.76    3.18
  12   4   3   54.86    3.98
  13  -4   3    4.76    0.66
  13  -4   3    4.96    1.23
  13  -4   3    5.95    0.80
 -13  -4  -3    5.53    0.92
 -13  -4  -3    5.08    0.89
  13   4   3    7.79    1.48
  13   4   3    4.29    0.47
  13   4   3    2.62    1.45
  13   4   3    7.62    1.39
  13   4   3    4.48    1.41
  13   4   3    6.19    0.99
  14  -4   3   10.50    0.88
 -14  -4  -3   12.90    1.24
 -14  -4  -3   11.44    1.21
  14  -4   3   11.94    1.02
  14  -4   3   11.31    1.56
  14   4   3   12.56    1.63
  14   4   3   10.41    1.18
  14   4   3   16.78    1.97
  14   4   3   10.16    1.60
  14   4   3   12.40    1.83
 -15  -4  -3    8.48    0.98
  15  -4   3    8.74    0.93
  15  -4   3   10.34    1.52
 -15  -4  -3    8.09    0.99
  15  -4   3    8.26    0.74
  15   4   3    7.60    1.01
  15   4   3    7.05    1.16
  15   4   3    7.71    1.28
  15   4   3   10.40    1.46
  15   4   3    7.62    1.40
 -16  -4  -3   36.90    2.01
 -16  -4  -3   35.65    2.03
  16  -4   3   37.21    2.46
  16  -4   3   35.57    1.85
  16   4   3   35.33    2.52
  16   4   3   37.21    2.03
  16   4   3   33.07    2.15
  16   4   3   34.54    2.49
  16   4   3   35.07    2.47
  17  -4   3    0.58    0.24
 -17  -4  -3    0.52    0.37
  17  -4   3    0.06    0.53
  17   4   3    0.72    0.64
  17   4   3    0.62    0.68
  18  -4   3   38.54    1.97
 -18  -4  -3   34.99    2.73
  18   4   3   38.66    1.98
  18   4   3   38.46    2.13
  19  -4   3    0.64    0.28
  19  -5  -3   17.89    1.14
  19  -5  -3   18.67    1.18
 -19  -5   3   17.41    1.39
 -19  -5   3   19.77    1.54
  19   5  -3   21.07    1.56
 -19   5   3   21.92    1.28
  19   5  -3   19.24    1.20
  18  -5  -3   14.14    1.03
  18  -5  -3   13.15    1.16
 -18  -5   3   14.41    1.47
  18  -5  -3   13.44    0.97
  18  -5  -3    9.11    1.17
 -18  -5   3   12.96    1.38
 -18   5   3   14.62    1.16
  18   5  -3   14.26    1.77
  18   5  -3   15.31    1.40
  18   5  -3   13.90    1.65
  18   5  -3   11.92    1.92
 -17  -5   3   12.03    1.39
  17  -5  -3    7.83    1.18
  17  -5  -3   11.20    1.17
 -17  -5   3    8.59    1.35
 -17  -5   3    8.26    1.30
  17  -5  -3   10.64    1.04
  17  -5  -3   10.56    0.91
  17   5  -3   13.66    1.60
  17   5  -3    8.94    1.53
 -17   5   3   11.74    1.13
  16  -5  -3   33.13    2.06
 -16  -5   3   38.04    2.86
  16  -5  -3   36.98    2.19
 -16  -5   3   37.98    2.91
  16  -5  -3   33.78    2.61
 -16  -5   3   33.05    2.50
  16   5  -3   35.93    1.90
  16   5  -3   37.36    2.74
 -16   5   3   36.32    2.28
  15  -5  -3    2.79    0.65
  15  -5  -3    2.90    0.81
  15  -5  -3    1.13    0.72
 -15  -5   3    2.83    0.90
 -15  -5   3    2.49    1.14
 -15  -5   3    3.18    1.19
  15  -5  -3    2.83    0.77
  15   5  -3    4.63    1.48
  15   5  -3    2.25    0.60
  15   5  -3    2.95    0.79
 -14  -5   3   45.63    3.60
 -14  -5   3   44.37    3.47
 -14  -5   3   50.42    3.23
  14  -5  -3   46.05    2.73
  14  -5  -3   45.30    3.35
  14  -5  -3   48.96    2.85
  14  -5  -3   47.97    2.78
  14  -5  -3   47.79    3.34
  14   5  -3   53.59    3.29
  14   5  -3   50.42    2.89
  13  -5  -3   -0.02    0.79
  13  -5  -3    1.02    0.53
  13  -5  -3    1.53    1.01
 -13  -5   3    0.94    0.76
  13  -5  -3    0.92    0.70
  13  -5  -3    0.09    0.45
 -13  -5   3    0.44    1.05
 -13  -5   3   -0.70    0.77
  13   5  -3    0.46    0.58
  13   5  -3   -0.20    0.68
  13   5  -3    0.81    0.92
  12  -5  -3   28.34    2.64
  12  -5  -3   31.73    2.03
  12  -5  -3   30.60    2.11
 -12  -5   3   29.18    2.87
 -12  -5   3   30.74    2.45
  12  -5  -3   31.05    1.56
  12  -5  -3   28.19    2.22
 -12  -5   3   31.10    2.80
  12  -5  -3   30.28    1.50
  12  -5  -3   33.66    2.76
  12   5  -3   32.62    2.36
  12   5  -3   32.55    2.52
  12   5  -3   34.20    2.77
  11  -5  -3    6.95    1.05
 -11  -5   3    6.33    1.25
  11  -5  -3    4.96    0.76
 -11  -5   3    5.82    1.46
  11  -5  -3    4.88    0.88
  11  -5  -3    5.53    0.66
  11  -5  -3    5.60    0.50
  11  -5  -3    3.46    1.28
 -11  -5   3    4.50    1.42
  11  -5  -3    7.14    1.49
 -11   5   3    3.87    1.17
  11   5  -3    5.62    1.12
  11   5  -3    6.59    1.43
  11   5  -3    6.71    1.54
 -10  -5   3  121.93    6.59
  10  -5  -3  116.95    5.26
  10  -5  -3  119.41    6.42
  10  -5  -3  116.96    5.51
 -10  -5   3  116.18    6.01
  10  -5  -3  111.80    6.24
 -10  -5   3  118.62    6.54
  10  -5  -3  118.39    5.68
 -10  -5   3  116.06    5.37
 -10  -5   3  119.36    5.98
  10   5  -3  122.21    5.34
 -10   5   3  107.72    6.66
  10   5  -3  123.14    6.06
   9  -5  -3   79.28    3.96
  -9  -5   3   75.59    4.22
   9  -5  -3   73.98    3.81
  -9  -5   3   75.53    4.27
   9  -5  -3   73.29    3.98
   9  -5  -3   79.10    3.73
  -9  -5   3   78.68    4.72
   9  -5  -3   79.36    4.55
   9   5  -3   81.11    3.80
  -9   5   3   80.92    5.06
   9   5  -3   74.96    4.33
   8  -5  -3   19.67    1.37
   8  -5  -3   16.84    1.49
   8  -5  -3   21.33    2.24
  -8  -5   3   22.70    1.77
   8  -5  -3   22.22    1.58
   8  -5  -3   19.27    1.42
  -8   5   3   17.98    2.10
   8   5  -3   18.44    1.56
  -8   5   3   19.91    2.00
  -7  -5   3   61.59    3.70
  -7  -5   3   57.67    5.23
  -7  -5   3   53.57    3.17
   7  -5  -3   61.89    3.33
   7  -5  -3   59.59    2.95
   7  -5  -3   54.40    3.04
   7  -5  -3   57.74    3.11
  -7   5   3   59.34    3.67
   7   5  -3   56.29    3.84
  -7   5   3   53.20    3.84
   6  -5  -3   35.08    1.98
  -6  -5   3   36.91    2.62
   6  -5  -3   29.66    3.17
   6  -5  -3   39.51    2.25
  -6  -5   3   38.41    3.93
   6  -5  -3   35.11    2.45
  -6   5   3   33.91    2.57
  -6   5   3   38.09    2.86
   6   5  -3   37.28    2.93
   5  -5  -3   20.89    1.60
   5  -5  -3   23.59    1.45
  -5  -5   3   25.39    1.99
   5  -5  -3   25.89    1.97
  -5  -5   3   23.21    2.87
   5  -5  -3   23.21    2.77
  -5   5   3   20.92    2.10
  -5   5   3   22.27    1.97
   5   5  -3   25.44    2.25
   5   5  -3   22.65    2.22
  -4  -5   3    8.27    1.25
   4  -5  -3    8.34    0.78
   4  -5  -3    8.95    1.42
  -4  -5   3    7.09    1.78
   4  -5  -3    8.37    1.96
   4   5  -3    8.42    1.21
  -4   5   3    7.65    1.42
   4   5  -3   10.27    1.75
  -4   5   3    9.46    1.22
   3  -5  -3   62.36    4.81
   3  -5  -3   62.99    3.63
  -3  -5   3   58.81    4.35
  -3  -5   3   63.84    3.38
  -3   5   3   52.33    3.62
   3   5  -3   59.52    3.60
  -3   5   3   54.23    3.49
   3   5  -3   53.47    3.74
  -2  -5   3   51.05    3.72
  -2  -5   3   48.55    2.79
   2  -5  -3   45.61    3.03
  -2   5   3   41.60    2.96
  -2   5   3   45.30    3.18
   2   5  -3   43.32    3.21
   2   5  -3   48.73    3.03
   1  -5  -3    1.85    1.17
  -1  -5   3    2.06    0.60
  -1  -5   3    1.88    0.85
   1  -5  -3    1.96    0.79
   1   5  -3    1.69    0.88
   1   5  -3    1.65    0.61
  -1   5   3    1.79    0.82
  -1   5   3    1.75    0.70
   0  -5  -3  140.68    8.61
   0  -5  -3  125.24    6.66
   0  -5   3  139.32    7.07
   0  -5   3  135.23    6.27
   0   5   3  141.76    7.00
   0   5   3  120.45    6.60
   0   5  -3  128.26    6.80
   0   5  -3  133.87    6.52
  -1  -5  -3    1.69    0.74
   1  -5   3    0.77    0.58
   1  -5   3    0.83    0.46
  -1  -5  -3    2.65    1.50
  -1   5  -3    1.02    0.71
   1   5   3    0.55    0.61
  -1   5  -3    1.42    0.53
  -2  -5  -3  112.29    7.94
   2  -5   3  119.02    5.35
   2  -5   3  101.78    5.60
  -2  -5  -3  117.22    6.00
   2   5   3  116.51    5.95
  -2   5  -3  115.94    5.64
   3  -5   3   10.06    0.93
   3  -5   3   13.24    1.04
   3  -5   3   13.19    0.92
  -3   5  -3   15.24    1.35
   3   5   3   11.84    1.46
   4  -5   3  122.82    5.16
   4  -5   3  112.83    5.16
   4   5   3  129.47    6.21
  -4   5  -3  105.07    5.67
   5  -5   3  102.26    3.97
   5  -5   3   95.39    4.31
  -5   5  -3   89.91    4.81
   5   5   3   85.53    5.08
   6  -5   3    4.88    0.64
   6   5   3    3.82    1.04
   6   5   3    5.19    1.24
  -6   5  -3    4.13    0.86
   7  -5   3   51.06    2.61
   7  -5   3   54.51    3.81
  -7   5  -3   50.85    3.17
   7   5   3   53.38    3.33
   7   5   3   52.43    3.43
   7   5   3   52.55    3.20
   8  -5   3    3.21    1.23
  -8  -5  -3    2.24    1.50
   8  -5   3    1.60    0.45
  -8  -5  -3    2.78    1.02
  -8  -5  -3    1.76    0.62
  -8   5  -3    1.84    0.72
   8   5   3    3.41    0.95
   8   5   3    2.35    1.07
   8   5   3    1.07    0.67
   9  -5   3   34.96    1.92
  -9  -5  -3   37.28    2.79
   9  -5   3   34.80    1.87
   9  -5   3   35.36    2.88
  -9  -5  -3   32.35    2.01
  -9  -5  -3   32.63    3.38
   9  -5   3   36.20    2.88
  -9   5  -3   34.62    2.51
   9   5   3   36.35    2.43
   9   5   3   35.73    2.61
   9   5   3   36.18    2.84
  10  -5   3   10.07    0.89
  10  -5   3    9.90    0.91
 -10  -5  -3   12.20    1.18
  10  -5   3   12.48    1.88
 -10  -5  -3   11.50    2.23
 -10  -5  -3   10.85    1.77
  10   5   3   13.32    1.83
 -10   5  -3   13.25    1.48
  10   5   3   12.71    1.32
  10   5   3   12.76    1.77
 -11  -5  -3   81.57    5.38
 -11  -5  -3   76.01    4.65
  11  -5   3   73.80    3.64
  11  -5   3   76.46    3.69
  11  -5   3   75.12    4.57
 -11  -5  -3   80.54    3.77
  11   5   3   74.24    4.79
  11   5   3   81.38    4.07
  11   5   3   77.75    4.36
  11   5   3   81.85    4.55
  12  -5   3   31.29    2.53
 -12  -5  -3   33.05    3.18
 -12  -5  -3   30.01    1.84
 -12  -5  -3   33.89    2.68
  12  -5   3   28.23    1.74
  12  -5   3   29.08    1.68
  12   5   3   33.60    2.58
  12   5   3   29.53    2.06
  12   5   3   30.63    2.74
  12   5   3   31.86    1.94
 -13  -5  -3   21.25    2.13
  13  -5   3   20.79    1.41
 -13  -5  -3   22.21    2.61
  13  -5   3   22.11    2.06
  13  -5   3   21.32    1.28
 -13  -5  -3   22.25    1.46
  13   5   3   24.55    2.12
  13   5   3   21.52    2.31
  13   5   3   21.14    1.23
  13   5   3   25.24    2.75
  14  -5   3   92.55    4.93
  14  -5   3   92.46    4.15
 -14  -5  -3   92.13    5.67
  14   5   3   98.43    5.25
  14   5   3   91.17    4.91
  14   5   3   92.90    5.11
  14   5   3   88.70    5.20
  14   5   3   96.27    5.04
 -15  -5  -3    3.40    1.18
  15  -5   3    4.51    0.95
  15  -5   3    4.11    0.47
  15   5   3    4.28    1.16
  15   5   3    4.03    1.21
  15   5   3    3.69    0.88
 -16  -5  -3   90.56    5.13
  16  -5   3   88.39    4.51
  16  -5   3   91.90    3.91
  16   5   3   94.62    4.70
  16   5   3   90.02    4.32
  16   5   3   91.58    4.73
  17  -5   3   15.01    1.21
 -17  -5  -3   14.36    1.55
  17   5   3   13.63    1.28
  17   5   3   13.84    1.34
  17  -6  -3   26.48    1.81
  17  -6  -3   27.97    1.58
 -17  -6   3   26.68    1.96
  17  -6  -3   28.42    1.55
 -17  -6   3   27.30    2.20
 -17   6   3   27.15    1.59
  17   6  -3   27.16    1.93
  17   6  -3   29.23    2.78
  16  -6  -3    0.81    0.53
  16  -6  -3    0.75    0.36
 -16  -6   3    0.60    0.64
  16  -6  -3    2.02    0.59
  16  -6  -3    0.90    0.45
 -16  -6   3    1.79    0.95
  16   6  -3    1.38    0.84
 -16   6   3    1.52    0.53
  15  -6  -3   46.97    2.48
 -15  -6   3   47.04    3.21
  15  -6  -3   43.92    2.40
 -15  -6   3   44.55    2.47
  15  -6  -3   43.26    2.83
 -15  -6   3   49.40    3.29
  15  -6  -3   48.63    2.62
  15   6  -3   40.44    2.39
 -15   6   3   48.09    2.51
  15   6  -3   40.55    3.84
  15   6  -3   45.58    2.53
  14  -6  -3    1.22    0.72
 -14  -6   3    4.58    1.30
  14  -6  -3    1.23    0.55
 -14  -6   3    1.70    0.90
 -14  -6   3    1.58    0.63
  14  -6  -3    1.71    0.83
  14  -6  -3    1.44    0.50
 -14   6   3    2.11    1.10
  14   6  -3    1.26    0.83
  14   6  -3    2.04    0.76
  14   6  -3    1.76    0.59
  13  -6  -3   49.07    2.76
  13  -6  -3   53.70    3.34
 -13  -6   3   44.41    3.49
  13  -6  -3   46.30    2.84
  13  -6  -3   45.03    3.17
  13  -6  -3   52.17    2.82
 -13  -6   3   46.91    3.55
 -13  -6   3   48.62    3.04
  13   6  -3   49.81    2.97
  13   6  -3   49.99    3.17
  13   6  -3   51.03    3.35
 -12  -6   3    4.40    1.49
  12  -6  -3    1.43    0.91
 -12  -6   3    1.58    0.77
  12  -6  -3    1.44    0.51
  12  -6  -3    0.78    0.78
  12  -6  -3    2.12    0.69
  12  -6  -3    2.50    0.66
 -12  -6   3    3.32    1.21
  12   6  -3    2.04    0.86
  12   6  -3    3.25    1.03
  12   6  -3    3.39    0.86
  11  -6  -3   52.93    2.98
  11  -6  -3   58.88    3.72
  11  -6  -3   52.84    3.06
  11  -6  -3   57.84    3.68
 -11  -6   3   47.17    3.87
 -11  -6   3   58.98    4.09
 -11  -6   3   57.41    3.39
  11   6  -3   55.65    3.46
  11   6  -3   56.29    3.51
  11   6  -3   53.58    3.86
  10  -6  -3    5.76    0.96
  10  -6  -3    6.98    0.59
 -10  -6   3    8.20    1.27
 -10  -6   3    6.25    1.47
  10  -6  -3    9.18    1.64
  10  -6  -3    5.53    1.38
 -10  -6   3    7.56    0.89
 -10  -6   3   10.36    2.04
  10  -6  -3    7.46    1.06
  10   6  -3    8.51    1.41
  10   6  -3    8.29    1.78
   9  -6  -3   35.05    2.11
  -9  -6   3   32.55    2.99
   9  -6  -3   30.44    2.57
  -9  -6   3   34.62    2.31
  -9  -6   3   32.10    3.03
   9  -6  -3   33.34    1.79
   9  -6  -3   35.80    2.25
   9  -6  -3   32.71    2.67
   9  -6  -3   30.00    1.98
  -9  -6   3   34.83    2.08
   9   6  -3   32.22    1.98
   9   6  -3   33.64    2.52
  -8  -6   3  110.01    5.78
   8  -6  -3  100.75    5.16
  -8  -6   3  109.19    5.63
  -8  -6   3  116.05    5.21
   8  -6  -3  108.18    4.90
  -8  -6   3  107.23    5.06
   8  -6  -3  105.17    5.75
   8  -6  -3  103.80    5.96
  -8  -6   3  115.92    6.33
   8  -6  -3  111.61    5.12
   8  -6  -3  110.76    5.29
  -8  -6   3  102.14    5.82
   8   6  -3  100.42    5.58
  -8   6   3   96.88    6.27
   8   6  -3  109.13    5.06
  -7  -6   3    0.11    0.68
  -7  -6   3    1.53    1.12
   7  -6  -3   -0.63    0.86
  -7  -6   3   -1.08    1.00
   7  -6  -3    0.37    0.40
  -7  -6   3   -0.20    0.80
  -7  -6   3    1.34    1.12
   7  -6  -3    0.12    0.44
   7  -6  -3    0.99    0.75
   7  -6  -3    0.59    0.43
  -7  -6   3    0.18    0.60
  -7  -6   3    1.14    0.75
   7  -6  -3    0.25    0.50
   7   6  -3    0.59    0.54
  -7   6   3   -0.25    0.85
  -6  -6   3   21.89    2.26
  -6  -6   3   25.31    2.74
   6  -6  -3   23.60    1.80
  -6  -6   3   25.76    2.09
   6  -6  -3   24.02    2.18
  -6  -6   3   25.32    2.34
   6  -6  -3   26.46    1.83
  -6  -6   3   24.33    1.79
   6  -6  -3   22.72    2.38
   6  -6  -3   24.28    1.64
   6  -6  -3   25.21    2.00
  -6  -6   3   19.53    2.15
  -6   6   3   27.69    2.66
   6   6  -3   27.78    1.80
   5  -6  -3    6.80    1.18
  -5  -6   3    6.70    1.34
   5  -6  -3    8.08    1.13
  -5  -6   3    7.44    1.41
   5  -6  -3    8.79    1.50
   5  -6  -3    6.71    0.93
  -5  -6   3    6.92    1.39
  -5  -6   3    7.45    1.35
   5  -6  -3    8.93    1.21
   5   6  -3    8.66    1.12
  -5   6   3    7.75    1.67
  -4  -6   3   17.14    1.97
   4  -6  -3   17.81    1.79
   4  -6  -3   21.07    1.82
  -4  -6   3   17.20    1.81
  -4  -6   3   14.42    2.05
   4  -6  -3   18.42    1.53
  -4  -6   3   16.92    1.74
   4  -6  -3   20.07    1.37
  -4  -6   3   18.02    1.74
   4  -6  -3   16.80    1.96
  -4  -6   3   19.75    1.52
   4   6  -3   19.12    2.14
  -4   6   3   16.85    2.09
   4   6  -3   19.47    1.64
   3  -6  -3   61.74    3.89
   3  -6  -3   60.53    3.14
   3  -6  -3   59.67    3.74
  -3  -6   3   60.66    3.68
  -3  -6   3   64.23    3.61
   3  -6  -3   61.53    3.66
   3  -6  -3   61.06    3.34
  -3  -6   3   57.52    3.51
  -3  -6   3   60.83    3.25
   3   6  -3   66.73    4.21
  -3   6   3   62.11    4.24
   2  -6  -3   29.16    2.47
  -2  -6   3   24.65    2.07
   2  -6  -3   27.10    1.93
  -2  -6   3   29.21    2.16
   2  -6  -3   25.90    2.22
  -2  -6   3   29.80    1.82
   2  -6  -3   26.17    1.70
   2   6  -3   22.48    2.75
  -2   6   3   25.30    2.56
   2   6  -3   28.64    2.50
   1  -6  -3  119.33    6.40
  -1  -6   3  127.48    6.05
   1  -6  -3  116.91    6.18
  -1  -6   3  119.29    5.79
  -1  -6   3  128.93    5.61
   1  -6  -3  119.63    5.78
   1  -6  -3  128.31    5.58
   1   6  -3  113.61    6.70
  -1   6   3  105.11    6.61
  -1   6   3  123.63    6.78
   1   6  -3  116.12    6.41
   0  -6   3    1.39    0.85
   0  -6  -3   -0.22    1.00
   0  -6  -3    1.62    0.84
   0  -6   3    1.50    0.50
   0  -6   3    1.05    0.63
   0  -6   3    0.38    0.53
   0  -6  -3    1.03    0.44
   0   6   3    1.59    1.16
   0   6   3    0.52    0.76
   0   6  -3    1.17    0.73
   0   6  -3    1.00    0.84
   1  -6   3  105.80    4.82
  -1  -6  -3  104.13    5.78
   1  -6   3  102.87    5.46
  -1  -6  -3   93.85    5.42
  -1  -6  -3  104.86    4.81
   1  -6   3  103.18    4.74
   1  -6   3  102.89    5.04
   1   6   3  100.15    4.79
   1   6   3   93.48    5.78
  -1   6  -3   98.24    5.86
  -1   6  -3   95.31    5.49
   2  -6   3    0.49    0.35
  -2  -6  -3   -0.08    0.87
   2  -6   3    0.20    0.48
   2  -6   3    0.26    0.45
   2  -6   3    0.89    0.84
   2   6   3    0.40    0.57
   2   6   3    1.30    0.83
  -2   6  -3    0.36    0.56
   2   6   3    0.43    0.89
  -3  -6  -3  144.31    7.37
   3  -6   3  154.11    6.52
   3  -6   3  156.60    6.85
   3  -6   3  156.91    6.88
   3  -6   3  150.05    7.66
  -3   6  -3  159.05    7.73
   3   6   3  152.21    7.43
   3   6   3  156.51    6.91
  -4  -6  -3   33.73    2.60
   4  -6   3   30.15    1.85
   4  -6   3   31.22    1.61
  -4  -6  -3   39.27    3.82
   4  -6   3   39.11    3.30
   4  -6   3   32.54    2.58
  -4   6  -3   30.92    2.45
   4   6   3   28.55    2.32
   4   6   3   31.55    1.96
   5  -6   3   19.04    1.31
  -5  -6  -3   18.51    2.01
  -5  -6  -3   18.15    1.51
   5  -6   3   21.19    2.40
   5  -6   3   17.44    1.96
  -5   6  -3   17.68    1.84
   5   6   3   18.84    1.35
   5   6   3   20.82    1.95
   6  -6   3   52.55    3.63
  -6  -6  -3   54.11    3.66
   6  -6   3   53.04    3.48
   6  -6   3   49.79    2.67
  -6  -6  -3   49.38    2.69
  -6   6  -3   54.43    3.45
   6   6   3   52.72    3.91
   6   6   3   52.52    3.27
   6   6   3   43.08    3.48
   7  -6   3    0.77    0.41
   7  -6   3    1.21    1.08
   7  -6   3    1.59    0.96
  -7  -6  -3    0.85    0.89
  -7   6  -3    1.99    0.81
   7   6   3    1.44    0.80
   7   6   3    1.44    0.77
   7   6   3    1.07    1.02
   8  -6   3   21.04    2.22
   8  -6   3   21.01    1.36
   8  -6   3   20.25    2.11
  -8  -6  -3   21.97    2.35
   8  -6   3   19.62    1.37
   8   6   3   22.27    1.98
   8   6   3   22.17    2.28
   8   6   3   20.11    1.85
   9  -6   3   14.38    1.87
  -9  -6  -3   18.61    2.19
   9  -6   3   15.18    1.18
   9  -6   3   17.72    1.20
   9  -6   3   17.90    1.94
   9   6   3   18.02    1.67
   9   6   3   16.81    1.95
   9   6   3   13.67    1.78
  10  -6   3    5.04    1.19
  10  -6   3    6.96    0.85
 -10  -6  -3    8.02    1.59
  10  -6   3    5.41    1.17
  10  -6   3    7.74    0.73
  10   6   3    7.22    1.29
  10   6   3    6.41    1.03
  10   6   3    7.38    1.29
  11  -6   3   18.41    1.24
  11  -6   3   16.79    1.92
  11  -6   3   19.55    1.87
  11  -6   3   15.25    1.07
 -11  -6  -3   16.87    2.05
  11   6   3   16.63    1.63
  11   6   3   14.78    1.37
  11   6   3   19.07    1.89
  12  -6   3    5.29    0.60
  12  -6   3    3.62    0.93
 -12  -6  -3    4.57    1.27
  12   6   3    4.85    0.70
  12   6   3    5.34    0.82
  12   6   3    5.75    1.22
  12   6   3    5.32    1.41
 -13  -6  -3   64.55    4.01
  13  -6   3   63.01    2.92
  13  -6   3   68.92    3.73
  13   6   3   64.13    3.81
  13   6   3   62.77    3.73
  14  -6   3    1.32    0.55
  14  -6   3    0.75    0.22
 -14  -6  -3    0.51    0.59
  14   6   3    2.63    1.06
  14   6   3    1.81    0.72
  14   6   3    0.36    0.71
  15  -6   3   66.74    3.38
 -15  -6  -3   63.81    3.59
  15   6   3   62.87    3.58
  15   6   3   62.60    3.65
  15   6   3   65.81    3.33
  16  -6   3    5.22    0.71
 -16  -6  -3    4.71    0.57
 -16  -6  -3    6.18    0.81
  16   6   3    6.15    0.90
  16   6   3    5.35    0.56
  15  -7  -3   12.50    0.92
  15  -7  -3    9.67    0.82
 -15  -7   3   10.16    1.26
  15   7  -3   11.52    1.51
 -15   7   3   11.34    0.94
  14  -7  -3   -0.07    0.40
  14  -7  -3    0.07    0.35
  14  -7  -3    0.13    0.53
 -14  -7   3   -0.36    0.56
  14  -7  -3    0.37    0.29
  14  -7  -3    0.46    0.46
 -14  -7   3    0.33    0.70
  14   7  -3    0.10    0.58
 -14   7   3    0.35    0.41
  14   7  -3   -0.43    0.35
  14   7  -3    0.76    0.42
  13  -7  -3    0.54    0.34
 -13  -7   3    0.60    0.78
  13  -7  -3   -0.13    0.54
  13  -7  -3   -0.29    0.46
  13  -7  -3   -0.09    0.48
  13  -7  -3    0.47    0.40
 -13  -7   3    0.99    0.75
  13   7  -3    0.55    0.51
  13   7  -3    0.28    0.58
 -13   7   3    0.97    0.60
  13   7  -3    0.44    0.46
  12  -7  -3    1.60    0.71
  12  -7  -3    1.31    0.51
 -12  -7   3    3.04    1.09
  12  -7  -3    1.11    0.67
  12  -7  -3    1.33    0.51
 -12  -7   3    0.90    0.89
  12  -7  -3    2.14    0.70
  12   7  -3    2.29    0.71
  12   7  -3    1.68    0.68
  12   7  -3    1.03    0.72
 -12   7   3    1.09    0.67
 -11  -7   3   12.90    1.85
  11  -7  -3   14.04    1.27
  11  -7  -3   13.00    1.60
  11  -7  -3   14.33    1.39
 -11  -7   3   15.12    1.84
  11  -7  -3   16.29    1.70
  11  -7  -3   15.63    1.27
 -11  -7   3   15.40    2.03
  11   7  -3   15.25    1.89
  11   7  -3   14.62    1.74
  11   7  -3   15.88    1.59
 -11   7   3   15.70    1.39
 -10  -7   3    2.87    1.11
 -10  -7   3    3.16    1.17
  10  -7  -3    3.39    0.80
  10  -7  -3    1.88    0.89
  10  -7  -3    4.49    0.77
  10  -7  -3    3.05    0.99
 -10  -7   3    3.62    1.17
  10  -7  -3    4.99    0.87
  10   7  -3    3.82    0.96
  10   7  -3    2.38    1.14
 -10   7   3    2.41    0.78
   9  -7  -3   78.00    4.50
   9  -7  -3   70.74    3.87
  -9  -7   3   75.37    3.69
   9  -7  -3   79.05    4.01
   9  -7  -3   76.00    4.48
  -9  -7   3   77.43    4.51
  -9  -7   3   86.03    4.64
  -9  -7   3   83.93    5.02
   9   7  -3   79.33    4.40
   9   7  -3   78.33    3.69
  -9   7   3   78.92    3.99
   8  -7  -3   -0.45    0.39
  -8  -7   3   -0.51    0.81
   8  -7  -3    0.20    0.23
   8  -7  -3   -0.87    0.73
  -8  -7   3    1.33    0.56
  -8  -7   3    1.03    0.94
  -8  -7   3    0.83    0.91
   8  -7  -3    0.97    0.82
   8  -7  -3   -0.12    0.47
   8   7  -3    0.02    0.47
   8   7  -3   -0.04    0.61
  -8   7   3    1.18    0.74
  -7  -7   3  135.44    6.73
   7  -7  -3  125.46    6.18
   7  -7  -3  129.90    5.85
   7  -7  -3  139.46    6.91
  -7  -7   3  137.82    6.16
  -7  -7   3  126.31    6.70
   7  -7  -3  136.07    6.38
   7  -7  -3  135.83    6.98
  -7  -7   3  138.46    7.38
   7   7  -3  133.04    6.11
   7   7  -3  128.04    6.67
  -7   7   3  142.91    6.36
   6  -7  -3    5.84    1.35
  -6  -7   3    5.22    0.92
  -6  -7   3    7.25    1.62
   6  -7  -3    7.34    1.00
   6  -7  -3    4.06    1.10
  -6  -7   3    4.56    1.15
   6  -7  -3    5.67    0.71
   6  -7  -3    5.87    0.97
  -6  -7   3    6.40    1.31
  -6  -7   3    7.61    1.33
   6  -7  -3    5.86    1.24
   6   7  -3    6.89    1.25
   6   7  -3    5.00    0.87
  -6   7   3    5.72    0.97
   5  -7  -3  115.08    6.16
  -5  -7   3  112.00    5.80
   5  -7  -3  110.87    5.34
   5  -7  -3  117.18    6.04
  -5  -7   3  116.10    5.84
  -5  -7   3  113.27    6.46
   5  -7  -3  110.85    5.53
   5  -7  -3  114.20    5.33
  -5  -7   3  105.32    5.62
  -5  -7   3  110.49    5.35
   5   7  -3  119.12    5.93
   5   7  -3  116.67    5.38
  -5   7   3  109.60    5.40
   4  -7  -3   12.93    1.52
   4  -7  -3   13.18    1.50
  -4  -7   3   13.34    1.35
  -4  -7   3   15.48    1.56
  -4  -7   3   15.90    1.86
   4  -7  -3   12.41    1.20
   4  -7  -3   11.44    1.73
  -4  -7   3   13.08    2.10
  -4  -7   3   11.19    1.52
  -4  -7   3   10.58    1.65
  -4  -7   3   14.09    1.45
  -4  -7   3   13.01    2.08
   4  -7  -3   13.48    1.34
   4  -7  -3   13.92    1.88
  -4   7   3   12.54    1.32
   4   7  -3   13.78    1.34
  -3  -7   3   49.98    3.37
   3  -7  -3   52.96    3.03
  -3  -7   3   51.11    3.73
  -3  -7   3   55.17    2.99
   3  -7  -3   51.74    3.57
   3  -7  -3   49.83    2.94
   3  -7  -3   53.18    3.38
   3  -7  -3   46.05    3.28
  -3  -7   3   55.12    3.19
  -3  -7   3   50.99    2.79
   3  -7  -3   53.75    3.09
  -3  -7   3   45.51    3.31
  -3  -7   3   51.21    3.20
  -3  -7   3   44.40    2.85
   3  -7  -3   50.89    2.83
   3   7  -3   48.23    2.84
  -3   7   3   49.33    2.81
   2  -7  -3    1.35    0.93
  -2  -7   3    0.63    0.54
  -2  -7   3    1.13    0.69
  -2  -7   3    1.05    0.49
  -2  -7   3    0.75    0.71
   2  -7  -3    0.41    0.96
   2  -7  -3    0.01    0.75
  -2  -7   3   -0.23    0.65
   2  -7  -3    1.30    0.56
   2  -7  -3    0.70    0.69
   2  -7  -3    1.63    0.85
  -2  -7   3    0.80    1.07
  -2  -7   3    0.19    0.83
  -2  -7   3   -0.11    0.85
   2  -7  -3    0.14    0.56
  -2   7   3    0.91    0.59
   2   7  -3    1.75    0.72
   1  -7  -3   23.43    1.88
   1  -7  -3   23.34    2.39
  -1  -7   3   21.55    2.03
  -1  -7   3   23.96    2.51
   1  -7  -3   25.30    2.18
  -1  -7   3   23.58    2.15
   1  -7  -3   21.49    2.39
   1  -7  -3   22.26    1.67
   1  -7  -3   21.23    1.75
   1  -7  -3   26.14    2.16
  -1  -7   3   21.47    1.77
  -1  -7   3   26.71    1.77
  -1  -7   3   20.16    1.91
  -1   7   3   20.75    1.65
   0  -7   3    0.60    0.89
   0  -7   3    0.72    0.45
   0  -7  -3   -0.09    0.62
   0  -7   3    0.93    0.56
   0  -7  -3    0.37    1.01
   0  -7  -3    0.29    0.89
   0  -7   3    1.87    0.66
   0  -7   3   -0.26    0.76
   0  -7  -3   -0.40    0.73
   0  -7  -3    0.66    1.07
   0   7   3    0.83    0.57
  -1  -7  -3    1.40    1.06
  -1  -7  -3   -0.05    0.96
   1  -7   3    0.52    0.41
   1  -7   3    0.28    0.43
   1  -7   3   -1.54    0.85
   1  -7   3    0.60    0.56
  -1  -7  -3    1.09    0.66
   1  -7   3    0.47    0.64
  -1  -7  -3    0.39    0.96
  -1  -7  -3    1.12    0.88
   1   7   3   -0.23    0.65
   1   7   3    0.88    0.53
   2  -7   3    3.65    0.68
  -2  -7  -3    5.14    1.78
  -2  -7  -3    2.52    1.21
  -2  -7  -3    6.49    1.45
   2  -7   3    4.54    1.18
   2  -7   3    5.38    0.50
   2  -7   3    4.56    0.79
  -2  -7  -3    6.44    1.48
  -2  -7  -3    4.65    0.87
   2  -7   3    8.13    1.57
   2   7   3    4.70    1.06
   2   7   3    4.67    0.77
   3  -7   3   29.74    2.48
  -3  -7  -3   33.75    2.90
   3  -7   3   32.84    2.74
  -3  -7  -3   33.25    2.75
  -3  -7  -3   31.87    3.69
   3  -7   3   31.30    1.94
  -3  -7  -3   28.85    1.98
   3   7   3   31.33    1.92
   3   7   3   31.74    2.41
   4  -7   3    6.21    1.30
   4  -7   3    6.64    1.29
  -4  -7  -3    5.96    0.73
  -4  -7  -3    5.13    0.86
  -4  -7  -3    5.26    1.56
   4  -7   3    4.61    0.74
  -4  -7  -3    8.52    1.72
   4   7   3    5.74    0.82
   4   7   3    7.32    1.26
  -5  -7  -3   64.25    3.25
   5  -7   3   65.08    4.08
  -5  -7  -3   66.35    4.33
  -5  -7  -3   69.19    3.34
  -5  -7  -3   65.52    3.14
   5  -7   3   63.93    3.36
   5  -7   3   66.04    4.15
   5   7   3   69.65    3.26
   5   7   3   70.13    3.96
   6  -7   3    1.81    0.84
  -6  -7  -3    1.44    0.60
  -6  -7  -3    0.87    0.49
  -6  -7  -3    0.32    1.17
   6  -7   3    1.28    0.47
   6  -7   3    1.35    0.92
   6   7   3    0.93    0.73
   6   7   3    0.79    0.93
   6   7   3    1.48    0.84
  -7  -7  -3  105.20    5.14
   7  -7   3  104.15    4.80
  -7  -7  -3  103.83    4.81
   7  -7   3   99.64    4.82
   7  -7   3  100.28    5.58
   7  -7   3   98.86    5.58
  -7  -7  -3  111.12    6.03
   7   7   3  105.20    5.51
   7   7   3  100.92    5.41
   7   7   3  110.98    6.04
   8  -7   3    0.08    0.35
   8  -7   3    0.38    0.60
   8  -7   3   -0.36    0.22
  -8  -7  -3   -0.17    0.48
  -8  -7  -3    0.14    0.50
   8  -7   3   -0.70    0.56
  -8  -7  -3   -0.53    1.26
   8   7   3   -0.09    0.54
   8   7   3    0.09    0.66
   8   7   3    0.73    0.73
  -9  -7  -3  116.99    6.45
   9  -7   3  116.42    5.97
  -9  -7  -3  118.09    5.39
   9  -7   3  126.14    6.17
   9  -7   3  115.14    5.23
  -9  -7  -3  111.33    5.69
   9   7   3  120.93    5.79
   9   7   3  113.37    5.94
   9   7   3  119.53    6.17
 -10  -7  -3    5.29    0.91
  10  -7   3    5.80    0.64
  10  -7   3    6.01    1.07
 -10  -7  -3    4.41    1.44
 -10  -7  -3    4.34    0.71
  10  -7   3    5.60    1.05
  10   7   3    5.36    1.00
  10   7   3    5.92    1.16
  10   7   3    6.00    0.87
 -11  -7  -3   31.66    3.20
  11  -7   3   26.90    2.16
 -11  -7  -3   30.15    1.74
  11  -7   3   26.57    2.05
 -11  -7  -3   32.31    1.98
  11  -7   3   30.59    1.53
  11   7   3   29.17    2.20
  11   7   3   30.66    1.93
  11   7   3   27.40    1.76
 -12  -7  -3   -0.12    0.34
 -12  -7  -3    0.20    0.33
  12  -7   3    0.37    0.19
  12  -7   3    0.48    0.47
  12   7   3    0.71    0.83
  12   7   3    0.06    0.24
  12   7   3   -0.38    0.48
  13  -7   3   12.79    1.12
 -13  -7  -3   10.32    1.68
  13   7   3   13.94    1.29
  13   7   3    8.83    1.21
  14  -7   3    1.59    0.48
  14   7   3    1.43    1.39
  14   7   3    1.80    0.55
  13  -8  -3   44.26    2.08
  13  -8  -3   42.70    2.28
 -13  -8   3   37.24    2.84
  13  -8  -3   44.51    2.11
  12  -8  -3   11.60    0.85
 -12  -8   3    5.54    0.99
  12  -8  -3   11.35    0.91
  12  -8  -3   12.03    1.06
  12  -8  -3   10.34    1.05
 -12  -8   3   10.79    0.86
 -12   8   3   10.02    0.91
  12   8  -3    9.82    1.06
  12   8  -3   10.82    1.14
  11  -8  -3   58.57    3.24
 -11  -8   3   57.94    2.92
  11  -8  -3   61.75    2.88
 -11  -8   3   54.78    3.40
  11  -8  -3   58.60    2.91
 -11  -8   3   61.05    3.30
  11  -8  -3   63.27    3.22
  11  -8  -3   57.50    2.91
  11   8  -3   56.26    3.42
  11   8  -3   58.73    3.19
 -11   8   3   62.03    2.96
  11   8  -3   56.19    3.25
  10  -8  -3   13.39    1.03
 -10  -8   3    7.63    1.13
  10  -8  -3   11.29    1.22
 -10  -8   3    8.80    1.36
  10  -8  -3   11.70    0.96
  10  -8  -3   11.58    1.05
  10  -8  -3   11.13    1.27
 -10  -8   3   12.94    1.11
  10   8  -3    7.88    1.10
  10   8  -3   11.33    1.35
  10   8  -3   13.57    1.56
  -9  -8   3   34.36    2.72
   9  -8  -3   36.26    2.41
  -9  -8   3   32.82    2.40
   9  -8  -3   34.90    2.46
   9  -8  -3   40.31    2.15
  -9  -8   3   38.19    2.15
   9  -8  -3   38.02    2.06
   9  -8  -3   36.09    2.14
  -9   8   3   38.06    2.11
   9   8  -3   35.25    2.41
   9   8  -3   38.53    2.93
  -8  -8   3   -0.77    0.66
   8  -8  -3    0.71    0.60
   8  -8  -3    0.54    0.53
   8  -8  -3    0.73    0.43
  -8  -8   3    0.54    0.44
   8  -8  -3    0.55    0.42
   8  -8  -3    0.82    0.64
  -8  -8   3    1.52    0.71
  -8  -8   3   -0.08    0.44
  -8   8   3   -0.68    0.46
   8   8  -3    0.12    0.57
   7  -8  -3    0.33    0.62
  -7  -8   3    1.33    0.52
  -7  -8   3    1.89    0.72
  -7  -8   3    2.34    0.54
  -7  -8   3    1.64    1.00
   7  -8  -3    0.69    0.54
   7  -8  -3    2.07    0.55
   7  -8  -3    1.58    0.68
   7   8  -3    0.37    0.60
  -7   8   3    1.80    0.58
   7   8  -3    1.60    0.49
  -6  -8   3    4.64    0.94
   6  -8  -3    7.14    0.93
  -6  -8   3    9.07    0.96
  -6  -8   3    6.62    0.69
   6  -8  -3    6.02    0.92
  -6  -8   3    9.10    1.63
   6  -8  -3    5.09    1.09
   6  -8  -3    6.95    1.23
   6   8  -3    5.22    1.00
  -6   8   3    5.96    0.86
   6   8  -3    6.13    0.83
   5  -8  -3   11.09    1.26
  -5  -8   3    9.57    1.21
   5  -8  -3    9.21    1.17
   5  -8  -3   11.17    0.81
   5  -8  -3   11.25    1.53
   5  -8  -3   10.82    1.60
  -5  -8   3   13.49    1.93
  -5  -8   3   13.31    1.18
   5   8  -3   11.23    1.14
  -5   8   3   11.24    1.16
   5   8  -3   12.95    1.59
   4  -8  -3   41.91    2.36
   4  -8  -3   34.99    2.80
   4  -8  -3   40.95    2.81
  -4  -8   3   40.68    3.08
   4  -8  -3   38.31    2.09
  -4  -8   3   39.70    2.44
  -4  -8   3   42.29    2.34
   4  -8  -3   39.16    2.47
  -4   8   3   39.19    2.34
   4   8  -3   39.21    2.29
   4   8  -3   36.42    2.66
   3  -8  -3   22.31    1.58
  -3  -8   3   21.83    1.71
   3  -8  -3   23.10    1.68
   3  -8  -3   21.82    2.02
  -3  -8   3   25.61    1.79
   3  -8  -3   25.93    1.87
  -3  -8   3   22.77    2.06
  -3  -8   3   24.07    1.78
  -3  -8   3   22.32    2.29
   3  -8  -3   24.68    2.24
   3   8  -3   24.15    1.71
  -3   8   3   25.21    1.69
   3   8  -3   26.07    2.08
   2  -8  -3    1.42    0.93
   2  -8  -3    2.61    0.87
  -2  -8   3    1.88    0.95
  -2  -8   3    1.23    0.49
   2  -8  -3    1.62    0.59
  -2  -8   3    1.78    0.62
  -2  -8   3    2.36    0.90
  -2  -8   3    1.20    0.70
   2  -8  -3    0.94    0.59
   2   8  -3    2.40    0.88
  -2   8   3    1.72    0.59
   2   8  -3    2.57    0.67
  -1  -8   3   93.26    4.59
   1  -8  -3   93.94    4.91
  -1  -8   3   84.03    4.49
  -1  -8   3   90.97    5.23
   1  -8  -3   90.10    5.05
   1  -8  -3   87.03    4.59
  -1  -8   3   88.44    4.93
  -1  -8   3   93.18    4.16
   1  -8  -3   92.79    4.42
   1   8  -3   98.52    4.54
   1   8  -3   95.89    4.87
  -1   8   3   93.48    4.42
   0  -8  -3   -0.30    0.59
   0  -8   3   -0.78    0.39
   0  -8  -3   -0.88    0.46
   0  -8  -3    1.19    0.81
   0  -8   3    0.11    0.63
   0  -8   3    0.36    0.70
   0  -8   3    1.51    0.80
   0   8  -3    0.38    0.58
   0   8   3    0.29    0.46
  -1  -8  -3   89.07    4.82
   1  -8   3   91.90    4.54
  -1  -8  -3   97.16    5.19
   1  -8   3   92.85    5.22
  -1  -8  -3  102.60    4.43
   1  -8   3   91.78    5.05
   1   8   3   84.40    4.33
  -1   8  -3   90.85    4.54
  -2  -8  -3    5.60    0.78
   2  -8   3    4.97    0.82
   2  -8   3    5.25    1.12
  -2  -8  -3    4.15    0.82
  -2  -8  -3    2.84    1.05
  -2  -8  -3    3.42    0.98
   2  -8   3    4.19    1.04
   2   8   3    3.78    0.66
   2   8   3    3.54    1.04
  -3  -8  -3   48.98    2.86
  -3  -8  -3   48.64    3.88
   3  -8   3   42.14    2.53
   3  -8   3   50.03    2.66
  -3  -8  -3   49.18    2.49
  -3  -8  -3   45.42    3.11
   3  -8   3   47.32    3.17
   3  -8   3   51.34    3.28
   3   8   3   47.71    2.46
   3   8   3   49.29    3.09
  -4  -8  -3    1.47    0.55
  -4  -8  -3    1.04    0.71
  -4  -8  -3   -1.03    0.80
   4  -8   3    1.47    0.84
   4  -8   3    1.67    0.53
   4  -8   3    1.92    0.79
   4   8   3    1.07    0.76
   5  -8   3   23.82    2.10
  -5  -8  -3   22.66    1.94
   5  -8   3   26.99    2.20
  -5  -8  -3   27.78    2.40
   5  -8   3   27.39    1.67
   5   8   3   25.70    2.11
   5   8   3   26.43    2.49
   6  -8   3    7.90    1.29
  -6  -8  -3    5.24    1.32
   6  -8   3    6.42    0.77
   6  -8   3    6.85    1.23
  -6  -8  -3    7.74    1.19
   6   8   3    7.30    1.16
   6   8   3    8.06    1.26
   6   8   3    6.41    1.33
  -7  -8  -3    0.43    1.00
   7  -8   3    0.67    0.31
  -7  -8  -3    1.74    0.79
   7  -8   3    0.37    0.57
   7  -8   3    0.32    0.54
   7   8   3    2.35    0.74
   7   8   3    1.49    0.64
   7   8   3    1.37    0.80
   8  -8   3   25.80    1.41
  -8  -8  -3   26.83    2.03
   8  -8   3   24.64    1.93
   8  -8   3   26.66    1.93
   8   8   3   24.92    1.98
   8   8   3   23.37    1.78
   8   8   3   24.89    2.02
   9  -8   3    0.81    0.48
   9  -8   3    0.64    0.24
  -9  -8  -3    2.28    0.79
   9  -8   3    0.00    0.51
   9   8   3    0.22    0.39
   9   8   3    0.86    0.51
   9   8   3    1.13    0.62
 -10  -8  -3    8.68    1.09
  10  -8   3    9.96    1.11
  10  -8   3   10.76    0.89
  10  -8   3   10.78    1.06
  10   8   3    9.07    0.82
  10   8   3    9.48    1.17
  10   8   3   10.28    0.86
  11  -8   3   30.36    1.81
  11  -8   3   29.05    1.55
 -11  -8  -3   29.71    1.86
  11   8   3   29.56    2.54
  11   8   3   28.37    1.91
   9  -9  -3    8.90    1.03
   9  -9  -3    4.15    0.96
   9  -9  -3    8.21    0.67
   9  -9  -3    8.66    0.64
  -9  -9   3    7.87    0.95
   9   9  -3   10.61    1.59
  -9   9   3    8.58    0.86
   9   9  -3    8.55    1.45
   8  -9  -3    4.28    0.66
   8  -9  -3    6.60    0.84
  -8  -9   3    3.11    0.70
   8  -9  -3    4.92    0.57
   8   9  -3    5.49    0.81
  -8   9   3    4.71    0.57
   8   9  -3    5.04    0.94
  -7  -9   3   13.45    1.36
   7  -9  -3   16.11    1.01
   7  -9  -3   13.86    1.26
   7  -9  -3   13.14    1.18
  -7  -9   3   14.49    0.89
   7  -9  -3   15.01    1.03
   7   9  -3   15.41    1.35
   7   9  -3   16.01    1.66
   6  -9  -3    0.45    0.49
  -6  -9   3    1.10    0.58
   6  -9  -3    1.11    0.49
   6  -9  -3    0.80    0.35
  -6  -9   3    0.39    0.28
   6  -9  -3    0.43    0.29
   6   9  -3   -0.41    0.41
  -6   9   3    0.31    0.33
   5  -9  -3   13.14    0.99
  -5  -9   3   14.32    1.43
  -5  -9   3   14.07    1.03
   5  -9  -3   14.25    1.07
   5  -9  -3   14.19    1.29
   5  -9  -3   14.03    1.18
   5  -9  -3   14.80    1.38
  -5   9   3   14.61    1.06
   5   9  -3   15.05    0.99
   5   9  -3   14.64    1.33
  -4  -9   3    8.19    1.15
   4  -9  -3    8.17    1.05
   4  -9  -3    9.87    0.81
  -4  -9   3    8.38    0.82
   4  -9  -3    8.43    0.86
   4  -9  -3    7.03    0.95
   4   9  -3    8.68    1.05
  -4   9   3    8.28    0.83
   4   9  -3    8.94    0.83
  -3  -9   3   24.77    1.90
  -3  -9   3   21.15    1.40
   3  -9  -3   21.69    1.39
   3  -9  -3   21.30    1.69
   3  -9  -3   21.03    1.30
   3  -9  -3   22.32    1.70
   3   9  -3   22.08    1.36
  -3   9   3   18.58    1.33
   3   9  -3   20.91    1.63
  -2  -9   3   64.76    3.48
   2  -9  -3   63.09    3.03
  -2  -9   3   65.23    3.17
   2  -9  -3   67.89    3.12
   2  -9  -3   67.00    3.55
  -2  -9   3   60.04    3.30
  -2  -9   3   65.90    3.70
   2   9  -3   63.70    3.14
  -2   9   3   65.39    3.10
  -1  -9   3   13.07    1.11
   1  -9  -3   11.70    0.97
  -1  -9   3   12.63    1.35
  -1  -9   3    9.80    1.22
  -1  -9   3    8.96    1.07
   1  -9  -3   12.25    1.38
   1  -9  -3   13.05    0.84
   1  -9  -3   11.09    1.05
   1   9  -3   10.90    1.01
  -1   9   3   11.71    0.96
   0  -9   3   45.82    2.40
   0  -9   3   45.48    2.73
   0  -9  -3   43.96    2.69
   0  -9   3   48.96    2.51
   0  -9   3   42.06    2.75
   0  -9  -3   46.34    2.26
   0  -9  -3   44.88    2.24
   0   9  -3   42.53    2.36
   0   9   3   43.03    2.22
   1  -9   3    0.39    0.52
   1  -9   3   -0.51    0.47
   1  -9   3   -0.08    0.41
  -1  -9  -3    0.16    0.33
  -1  -9  -3    0.85    0.39
   1  -9   3   -0.08    0.39
  -1   9  -3    0.35    0.42
   1   9   3    0.55    0.36
   2  -9   3   19.04    1.34
   2  -9   3   19.33    1.39
   2  -9   3   19.16    1.64
   2  -9   3   18.69    1.62
  -2  -9  -3   19.66    1.38
  -2   9  -3   21.81    1.37
   3  -9   3    6.38    0.79
   3  -9   3    5.90    1.00
   3  -9   3    7.34    0.80
   3  -9   3    6.89    1.02
  -3  -9  -3    6.01    0.79
   3   9   3    7.47    1.37
  -3   9  -3    7.40    0.86
   4  -9   3    9.48    0.81
   4  -9   3   10.04    1.00
   4  -9   3    8.30    1.13
  -4  -9  -3    7.86    0.93
   4  -9   3    9.38    1.12
   4   9   3    9.30    1.38
   4   9   3    8.63    1.02
   5  -9   3   27.82    1.86
   5  -9   3   29.72    1.68
   5  -9   3   29.90    1.93
  -5  -9  -3   29.45    1.83
  -5   9  -3   30.34    1.69
   5   9   3   25.32    1.84
   5   9   3   28.53    2.15
   6  -9   3   13.67    1.02
   6  -9   3   14.11    1.18
   6  -9   3   14.25    1.24
  -6  -9  -3   11.99    1.16
   6   9   3   13.50    1.30
   6   9   3   12.12    1.17
   7  -9   3   18.19    1.51
   7  -9   3   15.89    1.33
   7  -9   3   19.26    1.34
   7   9   3   19.81    1.39
   7   9   3   20.63    1.45
 -22   0   4   89.38    4.01
 -22   0   4   93.94    4.55
  21   0  -4    0.32    0.42
  21   0  -4   -0.29    0.19
 -21   0   4   -0.26    0.48
 -21   0   4    0.11    0.43
  20   0  -4   80.10    3.73
  20   0  -4   81.92    3.57
  20   0  -4   77.47    3.94
 -20   0   4   80.15    4.00
  20   0  -4   82.91    4.06
 -20   0   4   78.75    4.03
  20   0  -4   78.73    3.74
 -19   0   4    0.22    0.73
  19   0  -4   -0.22    0.41
  19   0  -4   -0.18    0.41
  19   0  -4    1.68    0.64
 -19   0   4   -0.53    0.61
  19   0  -4    0.07    0.68
  19   0  -4   -0.37    0.41
 -18   0   4   38.54    2.64
  18   0  -4   39.57    2.42
  18   0  -4   39.79    2.13
  18   0  -4   36.91    2.38
  18   0  -4   39.61    2.38
 -18   0   4   39.29    2.63
  18   0  -4   42.39    2.70
  18   0  -4   37.49    2.49
  17   0  -4    0.80    0.70
  17   0  -4    0.85    0.71
  17   0  -4    0.65    0.66
  17   0  -4    1.55    0.86
  17   0  -4    0.75    0.52
 -17   0   4    0.76    0.76
 -17   0   4   -0.23    0.77
  17   0  -4   -0.56    0.54
  16   0  -4    0.38    0.91
 -16   0   4    0.61    0.91
  16   0  -4    0.01    0.66
  16   0  -4   -0.42    0.58
  16   0  -4    0.84    0.60
  16   0  -4   -0.33    0.57
  16   0  -4    0.27    0.72
 -16   0   4    0.08    0.83
  16   0  -4    1.61    0.77
  15   0  -4   -0.21    0.59
  15   0  -4    0.87    1.00
  15   0  -4    0.01    0.64
  15   0  -4    0.17    0.62
 -15   0   4   -0.21    0.76
  15   0  -4    0.75    0.69
 -15   0   4    0.98    0.93
  15   0  -4    1.12    0.81
  15   0  -4    1.00    0.77
  14   0  -4   35.20    2.36
  14   0  -4   34.90    1.67
  14   0  -4   38.04    2.39
 -13   0   4   -0.15    0.49
  13   0  -4    0.42    0.31
  13   0  -4    0.97    0.47
 -13   0   4    0.11    0.90
  13   0  -4    0.09    1.13
 -12   0   4  161.89    7.86
  12   0  -4  161.69   10.14
  12   0  -4  163.39    7.44
 -12   0   4  166.16    8.82
  12   0  -4  167.68    7.16
 -11   0   4   -0.12    0.65
 -11   0   4   -0.29    0.37
  11   0  -4   -0.20    0.38
  11   0  -4    0.58    0.97
 -10   0   4  197.66    8.64
 -10   0   4  190.10    9.35
  10   0  -4  185.35    8.24
  10   0  -4  179.20   10.43
  -9   0   4   -0.04    0.55
   9   0  -4    0.02    0.67
   9   0  -4    0.13    0.38
   9   0  -4    0.46    0.40
  -9   0   4   -0.23    0.35
  -8   0   4  501.24   21.79
   8   0  -4  490.32   21.18
  -8   0   4  486.20   21.48
   8   0  -4  518.56   23.04
  -8   0   4  562.68   21.32
   8   0  -4  498.75   20.93
  -8   0   4  476.46   26.23
  -7   0   4   -0.10    0.45
   7   0  -4    0.21    0.55
  -7   0   4    0.16    0.30
  -7   0   4   -0.25    0.84
  -7   0   4    0.24    0.45
  -7   0   4    0.30    0.66
   7   0  -4   -0.02    0.23
  -6   0   4  384.51   15.30
   6   0  -4  348.05   15.09
   6   0  -4  385.73   19.13
  -6   0   4  377.17   16.67
   6   0  -4  365.16   16.63
  -6   0   4  346.94   15.45
  -6   0   4  371.04   19.28
   6   0  -4  333.18   15.24
  -6   0   4  352.58   15.64
  -5   0   4    0.02    0.41
  -5   0   4   -0.09    0.82
   5   0  -4    0.08    0.41
  -5   0   4    0.48    0.51
   5   0  -4    0.22    0.24
   5   0  -4    0.20    0.29
   5   0  -4    0.65    0.97
  -5   0   4    0.04    0.27
  -5   0   4    0.14    0.34
   5   0  -4    0.24    0.38
  -4   0   4   38.74    2.25
  -4   0   4   44.29    2.06
   4   0  -4   43.24    2.93
   4   0  -4   37.81    2.14
  -4   0   4   37.52    2.11
   4   0  -4   37.92    2.01
  -4   0   4   41.30    4.12
   4   0  -4   39.50    3.98
  -4   0   4   41.62    2.86
  -3   0   4    0.27    0.25
  -3   0   4    0.95    0.61
   3   0  -4    0.62    0.59
   3   0  -4    0.32    0.82
   3   0  -4    0.51    0.37
   3   0  -4    0.37    0.29
  -3   0   4    0.46    0.33
  -3   0   4    0.74    0.99
  -2   0   4    6.64    0.61
  -2   0   4    7.21    1.75
   2   0  -4    6.43    0.60
  -2   0   4    6.51    0.98
   2   0  -4    6.73    1.00
   2   0  -4    8.47    0.78
  -2   0   4    6.10    0.47
   2   0  -4    7.54    1.95
  -1   0   4    0.43    0.26
   1   0  -4    0.86    1.13
   1   0  -4    0.23    0.57
   1   0  -4   -0.28    0.18
  -1   0   4   -0.44    0.50
   1   0  -4    0.18    0.38
  -1   0   4    0.88    0.63
  -1   0   4    0.69    1.06
   0   0  -4   16.79    2.67
   0   0  -4   16.94    0.81
   0   0   4   17.12    1.61
   0   0   4   18.27    1.55
   0   0  -4   15.96    1.08
   0   0  -4   17.54    1.65
   0   0   4   16.46    0.87
   0   0   4   19.00    2.20
   1   0   4    1.44    0.73
   1   0   4    0.24    0.44
   1   0   4    1.62    0.61
  -1   0  -4    0.25    0.82
  -1   0  -4    1.61    1.26
   2   0   4   32.39    2.08
  -2   0  -4   29.49    3.18
  -2   0  -4   28.53    1.45
  -2   0  -4   29.35    2.89
  -3   0  -4   -0.10    0.68
  -3   0  -4   -0.05    0.18
   3   0   4    0.36    0.44
  -4   0  -4  283.39   12.64
  -4   0  -4  315.58   15.18
   4   0   4  312.61   13.33
   5   0   4    0.08    0.30
   5   0   4    0.36    0.40
  -5   0  -4    0.08    0.23
  -5   0  -4    0.10    0.67
  -6   0  -4  236.38    9.79
   6   0   4  216.07   10.18
   7   0   4   -0.24    0.20
  -7   0  -4    0.08    0.31
   7   0   4    0.22    0.40
   8   0   4  127.84    5.42
   8   0   4  120.08    6.38
  -8   0  -4  128.49    5.96
   9   0   4    0.01    0.28
   9   0   4    0.12    0.44
  -9   0  -4   -0.08    0.33
  10   0   4   35.16    2.75
 -10   0  -4   26.47    3.14
  10   0   4   40.32    1.94
 -10   0  -4   38.60    2.51
 -11   0  -4    0.81    0.57
  11   0   4   -0.18    0.27
 -11   0  -4   -0.31    0.54
  11   0   4    0.86    0.40
  11   0   4    0.23    0.56
  12   0   4    4.10    0.65
 -12   0  -4    2.62    1.00
  12   0   4    4.20    0.72
 -12   0  -4    2.35    0.89
  12   0   4    2.74    0.60
  13   0   4    0.15    0.48
  13   0   4   -0.15    0.31
  13   0   4   -0.99    0.55
 -13   0  -4    0.79    0.69
  13   0   4    0.50    0.48
  13   0   4    1.01    0.45
  14   0   4    6.55    0.78
  14   0   4    6.92    0.74
  14   0   4    6.67    0.95
  14   0   4    4.51    0.80
  14   0   4    6.12    0.80
  15   0   4    0.16    0.39
  15   0   4    0.13    0.68
  15   0   4   -0.35    0.34
  16   0   4   38.57    2.30
  16   0   4   41.16    2.45
 -17   0  -4    0.69    0.72
  17   0   4    0.86    0.48
  17   0   4    0.58    0.51
  18   0   4   60.61    3.19
  18   0   4   64.79    3.34
 -18   0  -4   60.58    3.24
  19   0   4    0.07    0.37
 -19   0  -4    1.18    0.53
  19   0   4    0.58    0.48
 -19   0  -4    0.40    0.52
  20   0   4   74.43    3.66
 -20   0  -4   81.47    3.66
 -20   0  -4   79.78    3.64
 -22  -1   4    1.50    0.54
  22  -1  -4    0.64    0.33
 -22   1   4    0.40    0.34
  21  -1  -4   21.97    1.50
  21  -1  -4   22.72    1.47
 -21  -1   4   24.10    1.95
 -21  -1   4   22.22    1.38
  21   1  -4   20.33    1.27
  21   1  -4   23.05    1.36
  21   1  -4   21.95    1.30
 -21   1   4   21.13    1.50
 -21   1   4   22.39    1.50
  20  -1  -4    7.95    1.12
  20  -1  -4    9.23    0.64
  20  -1  -4   10.58    1.13
 -20  -1   4   10.32    1.09
 -20  -1   4    7.74    0.94
  20  -1  -4    9.02    1.16
  20   1  -4    8.64    0.93
 -20   1   4    9.29    1.18
 -20   1   4    7.99    1.05
  20   1  -4    7.76    0.94
  20   1  -4    9.27    1.01
  20   1  -4   12.41    1.12
 -19  -1   4    5.59    0.91
  19  -1  -4    4.76    0.89
  19  -1  -4    6.32    0.74
 -19  -1   4    9.34    1.11
  19  -1  -4    6.48    0.61
  19  -1  -4    8.51    1.28
  19  -1  -4    7.32    1.24
  19  -1  -4    5.87    0.73
  19   1  -4    5.96    0.97
 -19   1   4    6.60    1.08
  19   1  -4    5.74    0.93
  19   1  -4    7.50    1.08
  19   1  -4    4.99    0.89
 -19   1   4    5.27    0.99
  19   1  -4    6.68    0.74
  19   1  -4    6.60    1.04
  18  -1  -4   42.24    2.78
 -18  -1   4   42.88    2.75
  18  -1  -4   45.84    2.96
  18  -1  -4   46.72    2.48
  18  -1  -4   40.36    2.37
 -18  -1   4   43.66    2.71
  18  -1  -4   45.93    2.45
  18  -1  -4   40.63    2.89
  18  -1  -4   45.73    2.93
  18   1  -4   43.57    2.67
  18   1  -4   46.53    2.79
 -18   1   4   44.71    2.87
  18   1  -4   43.26    2.80
  18   1  -4   47.16    2.76
  18   1  -4   44.99    2.59
  18   1  -4   45.22    2.72
 -18   1   4   45.00    2.91
  17  -1  -4    1.26    0.76
  17  -1  -4    4.87    0.83
  17  -1  -4    4.01    1.06
  17  -1  -4    5.47    1.23
  17  -1  -4    1.82    0.83
[truncated: 4,151,451 more chars]
